# Supplementary material for: Thyme (Thymus vulgaris L.) polyphenols ameliorate DSS-induced ulcerative colitis of mice by mitigating intestinal barrier damage, regulating gut microbiota, and suppressing TLR4/NF-κB-NLRP3 inflammasome pathways
Source: Royal Society of Chemistry journal article supplement (doi:10.1039/d2fo02523j), 2022-12-12
Supplement: d2fo02523j2.xlsx [file d2fo02523j2.xlsx]

## Sheet: Sample 1
TP Sample 1
	Serial number	Retention time (min)	Peak area (mAU*min)	Peak name
	1	3.12	26.49	Gallic acid
	2	15.01	998.444	Scutellarin
	3	17.29	50.1	Ferulic acid
	4	19.5	86.254	Apigenin-7-O-glucuronide
	5	21.23	981.02	Rosmarinic acid
	6	22.45	405.2	Scutellarein

## Sheet: Sample 2
TP Sample 2
	Serial number	Retention time (min)	Peak area (mAU*min)	Peak name
	1	3.08	28.33	Gallic acid
	2	14.99	979.256	Scutellarin
	3	17.33	51.65	Ferulic acid
	4	19.42	91.375	Apigenin-7-O-glucuronide
	5	21.24	993.57	Rosmarinic acid
	6	22.48	392.57	Scutellarein

## Sheet: Sample 3
TP Sample 3
	Serial number	Retention time (min)	Peak area (mAU*min)	Peak name
	1	3.13	26.12	Gallic acid
	2	15.06	1003.5	Scutellarin
	3	17.38	50.98	Ferulic acid
	4	19.48	88.514	Apigenin-7-O-glucuronide
	5	21.18	1023.47	Rosmarinic acid
	6	22.54	387.68	Scutellarein

## Sheet: Standard sample
Standard Sample 3
Qualitative Standard	Serial number	Retention time (min)	Peak area (mAU*min)	Peak name
	1	3.17	/	Gallic acid
	2	14.97	/	Scutellarin
	3	17.35	/	Ferulic acid
	4	19.54	/	Apigenin-7-O-glucuronide
	5	21.28	/	Rosmarinic acid
	6	22.52	/	Scutellarein
