# Supplementary material for: Thyme (Thymus vulgaris L.) polyphenols ameliorate DSS-induced ulcerative colitis of mice by mitigating intestinal barrier damage, regulating gut microbiota, and suppressing TLR4/NF-κB-NLRP3 inflammasome pathways
Source: Royal Society of Chemistry journal article supplement (doi:10.1039/d2fo02523j), 2022-12-12
Supplement: d2fo02523j3.xlsx [file d2fo02523j3.xlsx]

## Sheet: Food intake (g)
Food intake (g)
	NC						DSS						DSS+TP-SASP						DSS+TP-L						DSS+TP-M						DSS+TP-H
Day	1	2	3	4	5	6	1	2	3	4	5	6	1	2	3	4	5	6	1	2	3	4	5	6	1	2	3	4	5	6	1	2	3	4	5	6
1	2.22	2.27	2.41	2.31	2.33	2.38	2.33	2.29	2.26	2.31	2.34	2.33	2.58	2.53	2.5	2.55	2.56	2.56	2.48	2.42	2.36	2.41	2.44	2.45	2.52	2.5	2.58	2.56	2.47	2.51	2.66	2.58	2.63	2.64	2.54	2.61
5	2.3	2.25	2.26	2.25	2.24	2.3	2.35	2.24	2.27	2.3	2.16	2.24	2.32	2.35	2.38	2.37	2.44	2.42	2.22	2.16	2.14	2.23	2.25	2.22	2.37	2.34	2.34	2.4	2.42	2.39	2.44	2.39	2.38	2.43	2.46	2.46
10	2.24	2.28	2.12	2.16	2.28	2.2	1.92	1.91	1.87	1.94	1.96	1.9	2.02	2	2.11	2.04	1.98	2.07	1.96	1.92	1.91	1.96	1.95	1.94	1.82	1.88	1.94	1.9	1.91	1.89	1.92	1.91	1.94	1.93	1.88	1.9
15	2.34	2.2	2.28	2.3	2.19	2.31	2.08	2.05	2.02	2.1	2.13	2.08	2.18	2.21	2.32	2.23	2.24	2.3	2.09	2.12	2.06	2.07	2.18	2.14	2.11	2.17	2.23	2.16	2.13	2.14	2.15	2.19	2.24	2.26	2.26	2.2
20	2.21	2.25	2.32	2.27	2.28	2.29	1.97	1.9	1.88	1.96	1.94	1.93	1.92	1.93	1.96	2	2.07	2.02	1.97	2.01	1.91	1.96	2.06	1.97	2	2.02	2.08	2.05	1.98	1.99	1.96	2.05	2.08	2.08	2.11	2.02
25	2.28	2.3	2.37	2.33	2.24	2.26	1.96	1.91	1.86	1.93	1.91	1.89	1.98	2.1	2.06	2.03	2.18	2.09	2.01	2.04	2	2.06	2.12	2.03	2.09	2.06	2.13	2.1	2.04	2.1	2.09	2.13	2.17	2.2	2.21	2.14
30	2.22	2.19	2.18	2.26	2.27	2.22	1.8	1.79	1.77	1.81	1.83	1.8	1.82	1.85	1.88	1.89	1.93	1.89	1.92	1.91	1.89	1.94	1.97	1.93	1.95	1.92	2.03	2	1.88	1.94	1.96	1.99	2.06	2.03	1.94	1.94
35	2.32	2.27	2.24	2.3	2.34	2.33	1.93	1.85	1.82	1.93	1.9	1.87	1.86	1.91	2.02	2	1.96	1.93	2	1.95	1.96	2	2.06	2.07	2.16	1.99	2.05	2.1	1.97	2.09	2.04	2.1	2.16	2.09	2.07	2.08
40	2.34	2.27	2.23	2.2	2.19	2.29	1.86	1.72	1.69	1.82	1.76	1.77	1.74	1.8	1.92	1.89	1.82	1.79	1.82	1.81	1.78	1.75	1.76	1.8	1.95	1.87	1.88	1.91	1.84	1.89	1.99	2.01	2.06	2.06	2.02	2
45	2.19	2.23	2.28	2.23	2.23	2.22	1.81	1.85	1.88	1.83	1.82	1.83	1.87	1.91	1.98	1.95	1.96	1.95	1.86	1.82	1.79	1.78	1.78	1.83	2.04	1.96	1.95	2.01	1.93	1.95	2.11	2.1	2.15	2.14	2.09	2.11

## Sheet: Body weight (g)
Body weight (g)
	NC						DSS						DSS+SASP						DSS+TP-L						DSS+TP-M						DSS+TP-H
Day	1	2	3	4	5	6	1	2	3	4	5	6	1	2	3	4	5	6	1	2	3	4	5	6	1	2	3	4	5	6	1	2	3	4	5	6
1	22.3	22.5	22.4	21.7	22.2	22.8	21.8	21.8	22	21.6	21.8	21.7	21.7	22.3	21.8	21.5	22.4	21.5	21.4	21.8	22.4	22.5	22.1	22.9	21.4	21.8	21.4	22.3	21.3	22.5	22.5	22.3	22.1	22.6	22.2	23
5	22.7	22.6	22.5	22.2	22.8	22.9	21.4	21.6	21.8	21.4	21.5	21.4	22	22.1	22.3	21.8	22.1	21.7	21.6	22	22.5	21.9	22.3	23.1	21.6	22	21.5	22	21.7	22.6	22	21.8	21.4	22	21.8	22.2
10	23.4	22.8	22.8	22.8	23.4	23.1	19.7	20.1	20.4	19.8	19.6	20.3	20.7	19.8	20.6	20.5	20.2	20.6	19.8	20.6	20.7	19.6	20.1	20.2	19.8	20.6	20.6	20.8	20.5	20.6	20.7	20.3	19.8	20.9	20.2	21
15	23.1	23.2	22.9	22.7	23.7	22.6	20.3	20.6	20.7	20.4	20.5	20.9	21.4	20.9	21.1	21.3	21.9	21.5	20.6	21	21.3	20.7	20.7	21.2	20.6	21	21.3	21.3	21.2	21.3	21.1	21.3	20.5	21.6	21.1	21.5
20	23.1	23	22.9	23	23.5	22.6	19.5	19.4	19.9	19.6	19.6	20.2	20.8	20.2	20.5	20.6	20.7	20.5	20	20.6	20.4	20.2	20.1	21	20	20.6	21	20.7	20.9	20.7	20.6	20.7	20.4	21	20.5	21.1
25	22.9	22.6	22.6	23	23.2	22	20	20.5	20.7	20.1	20.3	20.7	21.2	20.8	20.9	21.1	21.3	21.1	20.7	21.1	20.6	21.1	19	20.6	20.7	21.1	21.4	21.4	21.3	21.5	21.1	21.4	21.1	21.5	20.8	21.4
30	22.7	21.9	22.4	22.5	22.6	22.4	19.1	19.6	19.5	18.8	19.2	19.5	20.6	19.8	20.2	20.1	20.4	20.3	19.5	20.3	19.8	20.3	19.4	19.2	20.4	20.3	20.7	20.8	20.9	20.9	20.9	20.8	20.4	21.1	20.3	20.6
35	22.4	22.6	22.8	22.5	22.9	22.3	19.6	20.1	20.3	19.3	20.3	20.4	21.1	21.4	20.9	21.2	20.9	20.9	20.4	20.9	20.1	20.6	20.3	19.9	20.9	20.9	21.8	22.1	21.3	20.4	21.4	21.7	20.9	21.5	20.9	21.7
40	22.7	22.1	22.7	23.2	23.2	23	18.7	19	18.9	18.5	18.8	19.5	20.2	19.6	19.7	19.9	20	19.9	19.6	20.2	19.2	19.5	19.3	19	20.2	20.6	21.2	21.4	21	19.7	20.6	21.2	20.6	20.9	20.2	21
45	23	23.3	22.9	22.7	23.4	22.7	19.5	20.4	20.4	19.5	19.2	20.1	20.8	20.5	20.9	20.8	20.7	20.5	20.5	20.5	20.1	20.6	19.8	19.5	21.2	21.1	21.1	22.3	21.5	20.4	21.3	21.5	21.3	21.6	21.2	21.7

## Sheet: DAI score
DAI score
	NC						DSS						DSS+SASP						DSS+TP-L						DSS+TP-M						DSS+TP-H
Day	1	2	3	4	5	6	1	2	3	4	5	6	1	2	3	4	5	6	1	2	3	4	5	6	1	2	3	4	5	6	1	2	3	4	5	6
1	0	0	0	0	0	0	0	0	0	0	0	0	0	0	0	0	0	0	0	0	0	0	0	0	0	0	0	0	0	0	0	0	0	0	0	0
5	0	0.3	0.7	0	0	0.4	1	1.1	1.3	1	1.3	1.5	0	0.7	1	0.3	1	1	0	1	1	1	1	0	0	1.3	1.3	0.3	1.3	1	0	0.3	1	0.7	1	1
10	0	0	0	0	0	0	3	3.3	3.7	3.4	3.7	3.7	3	3.5	3.5	3	3.5	3.5	3	4	4	3	4	3	3	3.7	3.7	3.7	3.7	3	2	2.7	3.7	3.3	3.3	3
15	0.5	0	0	0.5	0	0	2	1.7	2	1.3	1	2	1	1.3	1.5	1	1.5	1.7	1	0.7	0.7	0.7	0.7	1	1	1	1	1	1	1	1	1.3	1.3	1	1.3	1.3
20	0.3	0	0	0.1	0	0.2	2	2.2	2.3	2.1	2	2	2	1.7	1.5	1.5	2	2.3	1	1.3	1.7	1	1.3	1.7	1	1.3	1.3	1	1	1.3	1	1.7	1.3	1	1.7	1.3
25	0.3	0	0	0	0	0.3	1	1.2	1.7	1.7	1.3	1.1	1	1.2	1.5	1.3	1	1	1	0.7	1	1	0.7	1	1	1.3	1.3	1	1	1.3	1	1.3	1.3	0.7	0.7	1
30	0.5	0	0	0.1	0	0.4	2	2.7	2.7	1.7	1.7	2	1	1.5	2	1.7	1.5	1.3	3	1.7	1.3	2.3	2	2.3	2	2	1.7	1.4	1.7	2	1	1	1	1.3	1.3	1
35	0	0.1	0.5	0.2	0	0.2	2	2.2	2	2.1	2	2.3	2	1.3	1.5	1.7	2	1.5	2	1.8	0.7	1.5	1.3	0.7	2	1.7	1.3	1.3	1.3	1.6	2	1.3	1	1.7	1	1
40	0	0	0	0	0	0	3	3.7	2.7	2.6	3.5	3.3	2	1.5	1.5	1.3	2	1.7	2	0.7	1	0.7	0.3	1.9	1	1	1.3	1	0.7	1	1	1.3	1.3	1	1.3	1.3
45	0	0	0	0	0	0	2.7	2	1.7	1.7	2.3	2.4	2	1.3	1.5	2	1	1.2	1	1.5	1.3	1	0.7	0.5	1	0.7	1	1	0.7	1	1	0.7	1	1	0.7	1

## Sheet: Length of Colon (cm)
Length of Colon (cm)
	NC	DSS	DSS+SASP	DSS+TP-L	DSS+TP-M	DSS+TP-H
1	6.25	3.65	4.81	5.01	5.83	5.77
2	6.37	4.42	4.96	4.28	5.7	4.9
3	5.69	3.86	5.03	4.56	6.02	5.42
4	6.75	3.75	5.25	4.09	5.5	4.58
5	7.06	3.54	4.79	4.77	5.15	5.61
6	6.1	4.88	4.57	3.98	4.88	5.06

## Sheet: Spleen Weight (mg)
Spleen Weight
	NC	DSS	DSS+SASP	DSS+TP-L	DSS+TP-M	DSS+TP-H
	52.2	68.7	54.8	57.3	53.8	47.1
	47.7	68.2	67.9	59.6	52.9	53.9
	44.3	71.4	60.5	63.8	53.1	55.2
	49	84.9	58.8	62.7	44.6	47.9
	44.4	73.9	64.7	57.6	46.9	46.5
	42.7	77.8	65	58.4	55.6	48.2

## Sheet: Cecum Weight (g)
Cecum Weight (g)
	NC	DSS	DSS+SASP	DSS+TP-L	DSS+TP-M	DSS+TP-H
	0.322	0.5047	0.4329	0.4306	0.3538	0.3645
	0.3315	0.4811	0.4176	0.4099	0.3742	0.3933
	0.3722	0.4929	0.4017	0.4003	0.3811	0.3703
	0.3621	0.4886	0.4703	0.4155	0.4011	0.3856
	0.364	0.5164	0.4344	0.3956	0.385	0.3603
	0.3508	0.4683	0.4282	0.4499	0.3967	0.3816
