# Supplementary material for: Thyme (Thymus vulgaris L.) polyphenols ameliorate DSS-induced ulcerative colitis of mice by mitigating intestinal barrier damage, regulating gut microbiota, and suppressing TLR4/NF-κB-NLRP3 inflammasome pathways
Source: Royal Society of Chemistry journal article supplement (doi:10.1039/d2fo02523j), 2022-12-12
Supplement: d2fo02523j4.xlsx [file d2fo02523j4.xlsx]

## Sheet: Histological Score
Histological Score
	NC	DSS	DSS+SASP	DSS+TP-L	DSS+TP-M	DSS+TP-H
	1	12	7	6	5	5
	0	10	8	7	5	4
	0	11	7	7	4	3
	1	9	6	6	3	3
	0	10	6	5	4	5
	0	11	5	7	5	5

## Sheet: Figure
																		NC
																		DSS
																		DSS+SASP
																		DSS+TP-L
																		DSS+TP-M
																		DSS+TP-H

## Sheet: MPO
MPO (U/g wet tissue)
	NC	DSS	DSS+SASP	DSS+TP-L	DSS+TP-M	DSS+TP-H
	0.206	0.993	0.374	0.423	0.243	0.252
	0.265	0.895	0.226	0.511	0.297	0.203
	0.177	0.973	0.257	0.265	0.306	0.282
	0.216	1.003	0.344	0.315	0.267	0.293
	0.138	1.101	0.433	0.551	0.246	0.264
	0.177	0.836	0.324	0.344	0.276	0.292

## Sheet: NO
NO (μmol/g wet tissue)
	NC	DSS	DSS+SASP	DSS+TP-L	DSS+TP-M	DSS+TP-H
	0.0205	0.1127	0.0922	0.0717	0.0409	0.0512
	0.041	0.1536	0.0819	0.0615	0.0409	0.0307
	0.0205	0.1639	0.0717	0.0717	0.0307	0.0409
	0.041	0.1434	0.0615	0.0615	0.0512	0.0512
	0.0307	0.1229	0.0717	0.0615	0.0409	0.0409
	0.0205	0.1434	0.1024	0.0615	0.0512	0.0512
