# Supplementary material for: Thyme (Thymus vulgaris L.) polyphenols ameliorate DSS-induced ulcerative colitis of mice by mitigating intestinal barrier damage, regulating gut microbiota, and suppressing TLR4/NF-κB-NLRP3 inflammasome pathways
Source: Royal Society of Chemistry journal article supplement (doi:10.1039/d2fo02523j), 2022-12-12
Supplement: d2fo02523j5.xlsx [file d2fo02523j5.xlsx]

## Sheet: NLRP3
NLRP3 (pg/ml)
	NC	DSS	DSS+SASP	DSS+TP-L	DSS+TP-M	DSS+TP-H
	95	211.67	145	161.67	111.67	128.33
	95	195	178.33	178.33	128.33	111.67
	78.33	195	161.67	195	111.67	95
	111.67	228.33	178.33	195	111.67	95
	95	211.67	178.33	178.33	128.33	111.67
	95	195	161.67	145	95	95

## Sheet: TLR4
TLR4 (ng/ml)
	NC	DSS	DSS+SASP	DSS+TP-L	DSS+TP-M	DSS+TP-H
	7.279	12.525	9.902	7.279	6.623	3.344
	5.967	13.836	8.59	7.934	4.656	5.967
	4	11.869	8.59	5.967	7.279	4.656
	4.656	15.148	9.246	5.967	4	4
	3.344	13.18	9.902	5.967	5.311	5.967
	5.311	16.459	7.934	6.623	4.656	4

## Sheet: Caspase-1
Caspase-1 (pmol/L)
	NC	DSS	DSS+SASP	DSS+TP-L	DSS+TP-M	DSS+TP-H
	10.28	23.364	17.757	10.28	8.411	4.673
	6.542	25.234	19.626	10.28	10.28	10.28
	6.542	21.495	14.019	12.15	6.542	4.673
	8.411	23.364	15.888	14.019	4.673	8.411
	10.28	27.103	17.757	10.28	6.542	4.673
	4.673	25.234	19.626	12.15	8.411	6.542

## Sheet: NF-κB
NF-κB (pg/ml)
	NC	DSS	DSS+SASP	DSS+TP-L	DSS+TP-M	DSS+TP-H
	698.33	1198.33	848.33	1048.33	861.67	689.33
	873.33	1315.22	926.67	998.33	698.33	798.33
	831.67	1031.67	917	831.67	766.67	823.33
	723.33	1265	798.33	956.67	912	881.67
	865	1148.33	881.67	848.33	844.34	756.67
	763.7	1206.67	824.67	923.33	865	899.33

## Sheet: INF-γ
INF-γ (pg/ml)
	NC	DSS	DSS+SASP	DSS+TP-L	DSS+TP-M	DSS+TP-H
	111.67	186.67	136.67	128.33	128.33	115
	101.67	211.67	145.33	153.33	116.67	116.67
	128.33	186.67	136.67	145.67	128.33	124
	97	195	133.33	145	124	103.33
	117	228.33	128.33	133.33	120	121.79
	111.67	195	124.21	128.33	111.67	111.67

## Sheet: IL-1β
IL-1β (ng/L)
	NC	DSS	DSS+SASP	DSS+TP-L	DSS+TP-M	DSS+TP-H
	187.354	495.661	383.689	412.488	374.77	374.77
	211.799	520.669	358.936	484.733	327.164	353.66
	202.162	469.295	400.98	374.77	383.689	335.215
	153.974	453.116	318.388	457.692	378.714	340.664
	158.259	464.626	362.169	458.842	399.947	337.024
	197.766	466.956	335.215	375.753	359.307	359.307

## Sheet: IL-6
IL-6 (ng/L)
	NC	DSS	DSS+SASP	DSS+TP-L	DSS+TP-M	DSS+TP-H
	59.448	174.077	107.087	159.641	94.677	90.635
	51.394	161.411	94.677	141.752	79.835	90.885
	87.171	147.072	110.667	132.053	56.393	63.773
	40.842	183.822	87.662	154.822	93.404	80.442
	55.971	138.317	93.404	145.096	95.445	92.333
	79.502	155.155	87.417	139.273	82.903	76.251

## Sheet: LTB4
LTB4 (pg/ml)
	NC	DSS	DSS+SASP	DSS+TP-L	DSS+TP-M	DSS+TP-H
	24.375	177.946	112.946	118.125	104.732	82.411
	53.839	189.554	104.732	130.625	69.196	88.661
	57.411	182.054	94.018	108.304	88.661	93.161
	60.089	161.339	109.196	99.375	102.982	101.696
	40.446	193.125	101.161	96.696	107.411	82.982
	50.268	210.982	92.232	127.946	86.875	91.589

## Sheet: PGE2
PGE2 (pg/ml)
	NC	DSS	DSS+SASP	DSS+TP-L	DSS+TP-M	DSS+TP-H
	399.77	654.32	440.68	404.32	427.05	427.05
	368.86	558.86	395.23	510.23	429.32	429.32
	327.05	536.14	386.14	452.05	377.05	386.14
	377.05	563.41	345.23	483.86	402.05	402.05
	356.59	579.32	367.95	454.32	436.14	479.32
	392.95	615.68	406.59	478.86	463.41	395.23

## Sheet: TNF-α
TNF-α (pg/ml)
	NC	DSS	DSS+SASP	DSS+TP-L	DSS+TP-M	DSS+TP-H
	63.16	152.63	89.47	105.26	78.95	91.74
	57.49	173.68	98.95	89.47	89.47	78.95
	57.89	147.37	89.47	110.53	68.42	73.68
	63.16	141.84	105.26	89.47	80.57	83.68
	65.42	163.16	88.95	110.53	93.26	78.95
	69.42	138.58	82.72	97.89	84.21	84.21

[truncated: 2 more sheets: MCP-1, LPS]
