# Supplementary material for: Thyme (Thymus vulgaris L.) polyphenols ameliorate DSS-induced ulcerative colitis of mice by mitigating intestinal barrier damage, regulating gut microbiota, and suppressing TLR4/NF-κB-NLRP3 inflammasome pathways
Source: Royal Society of Chemistry journal article supplement (doi:10.1039/d2fo02523j), 2022-12-12
Supplement: d2fo02523j6.xlsx [file d2fo02523j6.xlsx]

## Sheet: NF-κB p65
NF-κB p65
Mean density	NC	DSS	DSS+SASP	DSS+TP-L	DSS+TP-M	DSS+TP-H
	0.1329	0.2584	0.2077	0.1889	0.1513	0.1489
	0.1417	0.2216	0.1983	0.1867	0.1529	0.1541
	0.1432	0.2412	0.2123	0.1925	0.1612	0.1602
	0.1455	0.2306	0.2204	0.1958	0.1577	0.1562
	0.1491	0.2268	0.1916	0.2023	0.1684	0.1654
	0.1577	0.2479	0.2095	0.1826	0.1722	0.1497
														NC
														DSS
														DSS+SASP
														DSS+TP-L
														DSS+TP-M
														DSS+TP-H

## Sheet: NLRP3
NLRP3
Mean density	NC	DSS	DSS+SASP	DSS+TP-L	DSS+TP-M	DSS+TP-H
	0.1644	0.3254	0.1763	0.2611	0.2044	0.1816
	0.2145	0.285	0.1842	0.2473	0.1877	0.1919
	0.2029	0.3093	0.2015	0.2366	0.2133	0.1854
	0.1774	0.3348	0.2129	0.2621	0.1931	0.1756
	0.1735	0.2928	0.1936	0.2317	0.1952	0.1883
	0.1946	0.3011	0.2156	0.2423	0.1854	0.2019
														NC
														DSS
														DSS+SASP
														DSS+TP-L
														DSS+TP-M
														DSS+TP-H

## Sheet: TLR4
TLR4
Mean density	NC	DSS	DSS+SASP	DSS+TP-L	DSS+TP-M	DSS+TP-H
	0.1755	0.2091	0.1692	0.176	0.1794	0.1686
	0.1545	0.212	0.1596	0.1781	0.1688	0.1634
	0.1577	0.1992	0.1853	0.1724	0.1723	0.1779
	0.1663	0.1889	0.1729	0.1845	0.1817	0.1812
	0.1473	0.1958	0.1821	0.1892	0.1823	0.1724
	0.1712	0.2131	0.1889	0.1677	0.1907	0.1925
														NC
														DSS
														DSS+SASP
														DSS+TP-L
														DSS+TP-M
														DSS+TP-H

## Sheet: Caspase-1
Caspase-1
Mean density	NC	DSS	DSS+SASP	DSS+TP-L	DSS+TP-M	DSS+TP-H
	0.1572	0.2105	0.2526	0.1949	0.1615	0.1565
	0.1638	0.2239	0.2318	0.2107	0.1732	0.1691
	0.1682	0.2426	0.2133	0.2051	0.1843	0.1716
	0.1725	0.2252	0.2424	0.1902	0.1559	0.162
	0.1545	0.2505	0.2377	0.2143	0.1727	0.1885
	0.1773	0.2389	0.2089	0.2236	0.1688	0.1779
														NC
														DSS
														DSS+SASP
														DSS+TP-L
														DSS+TP-M
														DSS+TP-H

## Sheet: MCP-1
MCP-1
Mean density	NC	DSS	DSS+SASP	DSS+TP-L	DSS+TP-M	DSS+TP-H
	0.1794	0.2483	0.1879	0.1916	0.1981	0.1737
	0.1618	0.2525	0.2016	0.2047	0.1655	0.1792
	0.1886	0.2733	0.1921	0.2204	0.1873	0.1689
	0.1936	0.2884	0.2122	0.2123	0.2012	0.1542
	0.1715	0.2467	0.2073	0.2088	0.1739	0.1677
	0.1832	0.252	0.2146	0.1846	0.1829	0.1574
														NC
														DSS
														DSS+SASP
														DSS+TP-L
														DSS+TP-M
														DSS+TP-H

## Sheet: IL-6
IL-6
Mean density	NC	DSS	DSS+SASP	DSS+TP-L	DSS+TP-M	DSS+TP-H
	0.1857	0.2064	0.1758	0.1864	0.1612	0.1625
	0.1637	0.182	0.1839	0.1756	0.1576	0.1701
	0.1518	0.1957	0.1637	0.1832	0.1679	0.1769
	0.157	0.2044	0.1802	0.1779	0.1724	0.1567
	0.1642	0.1896	0.1933	0.1811	0.1636	0.1522
	0.1597	0.2151	0.1902	0.1682	0.1493	0.1649
														NC
														DSS
														DSS+SASP
														DSS+TP-L
														DSS+TP-M
														DSS+TP-H

## Sheet: IL-1β
IL-1β
Mean density	NC	DSS	DSS+SASP	DSS+TP-L	DSS+TP-M	DSS+TP-H
	0.1455	0.2531	0.2231	0.182	0.1798	0.1916
	0.1327	0.2279	0.2194	0.1837	0.1814	0.1725
	0.1479	0.2357	0.2327	0.1894	0.1751	0.1824
	0.1512	0.2441	0.2142	0.1922	0.1824	0.1885
	0.1465	0.2621	0.2376	0.2065	0.1905	0.1861
	0.1398	0.2207	0.2265	0.1812	0.1854	0.1742
														NC
														DSS
														DSS+SASP
														DSS+TP-L
														DSS+TP-M
														DSS+TP-H

## Sheet: TNF-α
TNF-α
Mean density	NC	DSS	DSS+SASP	DSS+TP-L	DSS+TP-M	DSS+TP-H
	0.1364	0.2243	0.2531	0.1796	0.1682	0.1599
	0.1601	0.216	0.2237	0.168	0.1803	0.1732
	0.1417	0.2462	0.2136	0.1752	0.1838	0.1683
	0.1393	0.2533	0.2271	0.1813	0.1579	0.1706
	0.1305	0.2201	0.2312	0.1722	0.1742	0.1857
	0.1452	0.2015	0.2058	0.1886	0.1816	0.1788
														NC
														DSS
														DSS+SASP
														DSS+TP-L
														DSS+TP-M
														DSS+TP-H
