# Supplementary material for: Thyme (Thymus vulgaris L.) polyphenols ameliorate DSS-induced ulcerative colitis of mice by mitigating intestinal barrier damage, regulating gut microbiota, and suppressing TLR4/NF-κB-NLRP3 inflammasome pathways
Source: Royal Society of Chemistry journal article supplement (doi:10.1039/d2fo02523j), 2022-12-12
Supplement: d2fo02523j7.xlsx [file d2fo02523j7.xlsx]

## Sheet: Claudin-1
Claudin-1
Mean density	NC	DSS	DSS+SASP	DSS+TP-L	DSS+TP-M	DSS+TP-H
	0.171	0.098	0.115	0.109	0.127	0.133
	0.189	0.091	0.095	0.096	0.151	0.119
	0.168	0.104	0.105	0.112	0.138	0.143
	0.161	0.108	0.104	0.116	0.148	0.123
	0.186	0.084	0.116	0.102	0.129	0.133
	0.183	0.08	0.122	0.103	0.145	0.138
														NC
														DSS
														DSS+SASP
														DSS+TP-L
														DSS+TP-M
														DSS+TP-H

## Sheet: Occludin
Occludin
Mean density	NC	DSS	DSS+SASP	DSS+TP-L	DSS+TP-M	DSS+TP-H
	0.137	0.085	0.112	0.086	0.122	0.118
	0.123	0.075	0.099	0.09	0.118	0.122
	0.127	0.074	0.097	0.089	0.124	0.109
	0.118	0.079	0.092	0.097	0.103	0.114
	0.132	0.091	0.103	0.105	0.113	0.113
	0.116	0.081	0.102	0.098	0.11	0.103
														NC
														DSS
														DSS+SASP
														DSS+TP-L
														DSS+TP-M
														DSS+TP-H

## Sheet: ZO-1
ZO-1
Mean density	NC	DSS	DSS+SASP	DSS+TP-L	DSS+TP-M	DSS+TP-H
	0.175	0.064	0.085	0.081	0.159	0.164
	0.167	0.089	0.106	0.086	0.156	0.149
	0.162	0.075	0.097	0.091	0.171	0.172
	0.155	0.073	0.097	0.078	0.164	0.179
	0.158	0.086	0.089	0.091	0.146	0.161
	0.187	0.077	0.101	0.101	0.177	0.152
														NC
														DSS
														DSS+SASP
														DSS+TP-L
														DSS+TP-M
														DSS+TP-H
