# Supplementary material for: Thyme (Thymus vulgaris L.) polyphenols ameliorate DSS-induced ulcerative colitis of mice by mitigating intestinal barrier damage, regulating gut microbiota, and suppressing TLR4/NF-κB-NLRP3 inflammasome pathways
Source: Royal Society of Chemistry journal article supplement (doi:10.1039/d2fo02523j), 2022-12-12
Supplement: d2fo02523j9.xlsx [file d2fo02523j9.xlsx]

## Sheet: Figure 8A
common				group_NC				group_DSS				group_DSS+SASP				group_DSS+TP-L				group_DSS+TP-M				group_DSS+TP-H
OTUID	taxonomy	Sum_Abundance		OTUID	taxonomy	Sum_Abundance		OTUID	taxonomy	Sum_Abundance		OTUID	taxonomy	Sum_Abundance		OTUID	taxonomy	Sum_Abundance		OTUID	taxonomy	Sum_Abundance		OTUID	taxonomy	Sum_Abundance
OTU_1279	k__Bacteria; p__Bacteroidetes; c__Bacteroidia; o__Bacteroidales; f__Muribaculaceae; g__uncultured bacterium; s__uncultured bacterium	126		OTU_322	k__Bacteria; p__Bacteroidetes; c__Bacteroidia; o__Flavobacteriales; f__Flavobacteriaceae; g__Tenacibaculum; s__Tenacibaculum soleae	31		OTU_1079	k__Bacteria; p__Actinobacteria; c__Acidimicrobiia; o__Microtrichales; f__uncultured; g__uncultured actinobacterium; s__uncultured actinobacterium	3		OTU_1019	k__Bacteria; p__Bacteroidetes; c__Bacteroidia; o__Bacteroidales	3		OTU_1150	k__Bacteria; p__Bacteroidetes; c__Bacteroidia; o__Bacteroidales; f__Muribaculaceae	2		OTU_1102	k__Bacteria; p__Bacteroidetes; c__Bacteroidia; o__Bacteroidales; f__Muribaculaceae	17		OTU_927	k__Bacteria; p__Bacteroidetes; c__Bacteroidia; o__Bacteroidales; f__Muribaculaceae; g__uncultured bacterium; s__uncultured bacterium	2
OTU_1	k__Bacteria; p__Verrucomicrobia; c__Verrucomicrobiae; o__Verrucomicrobiales; f__Akkermansiaceae; g__Akkermansia; s__uncultured bacterium	159639		OTU_642	k__Bacteria; p__Firmicutes; c__Clostridia; o__Clostridiales; f__Ruminococcaceae	4		OTU_1283	k__Bacteria; p__Bacteroidetes; c__Bacteroidia; o__Bacteroidales; f__Muribaculaceae	2		OTU_1008	k__Bacteria; p__Bacteroidetes; c__Bacteroidia; o__Bacteroidales; f__Muribaculaceae; g__uncultured bacterium; s__uncultured bacterium	2		OTU_1284	k__Bacteria; p__Bacteroidetes; c__Bacteroidia; o__Bacteroidales	2		OTU_583	k__Bacteria; p__Bacteroidetes; c__Bacteroidia; o__Bacteroidales; f__Bacteroidaceae; g__Bacteroides	4		OTU_354	k__Bacteria; p__Bacteroidetes; c__Bacteroidia; o__Bacteroidales; f__Muribaculaceae; g__uncultured bacterium; s__uncultured bacterium	34
OTU_3	k__Bacteria; p__Firmicutes; c__Erysipelotrichia; o__Erysipelotrichales; f__Erysipelotrichaceae; g__Faecalibaculum; s__uncultured bacterium	118307		OTU_309	k__Bacteria; p__Bacteroidetes; c__Bacteroidia; o__Flavobacteriales; f__Weeksellaceae; g__uncultured; s__uncultured bacterium	15		OTU_382	k__Bacteria; p__Firmicutes; c__Negativicutes; o__Selenomonadales; f__Veillonellaceae; g__Megamonas; s__uncultured bacterium	18		OTU_1042	k__Bacteria; p__Firmicutes; c__Clostridia; o__Clostridiales; f__Ruminococcaceae	3		OTU_1066	k__Bacteria; p__Firmicutes; c__Erysipelotrichia; o__Erysipelotrichales; f__Erysipelotrichaceae; g__Ileibacterium; s__Erysipelotrichaceae bacterium NYU-BL-F16	2		OTU_566	k__Bacteria; p__Firmicutes; c__Clostridia; o__Clostridiales; f__Lachnospiraceae	3		OTU_1072	k__Bacteria; p__Bacteroidetes; c__Bacteroidia; o__Bacteroidales; f__Muribaculaceae; g__uncultured bacterium; s__uncultured bacterium	2
OTU_13	k__Bacteria; p__Bacteroidetes; c__Bacteroidia; o__Bacteroidales; f__Muribaculaceae; g__uncultured bacterium; s__uncultured bacterium	36170		OTU_378	k__Bacteria; p__Firmicutes; c__Clostridia; o__Clostridiales; f__Lachnospiraceae	15		OTU_947	k__Bacteria; p__Bacteroidetes; c__Bacteroidia; o__Bacteroidales; f__Muribaculaceae; g__Muribaculum; s__Parabacteroides sp. YL27	2		OTU_596	k__Bacteria; p__Bacteroidetes; c__Bacteroidia; o__Bacteroidales; f__Muribaculaceae	3		OTU_841	k__Bacteria; p__Firmicutes; c__Erysipelotrichia; o__Erysipelotrichales; f__Erysipelotrichaceae; g__Ileibacterium; s__Erysipelotrichaceae bacterium NYU-BL-F16	2		OTU_1067	k__Bacteria	4		OTU_783	k__Bacteria; p__Bacteroidetes; c__Bacteroidia; o__Bacteroidales; f__Muribaculaceae; g__uncultured bacterium; s__uncultured bacterium	3
OTU_4	k__Bacteria; p__Bacteroidetes; c__Bacteroidia; o__Bacteroidales; f__Bacteroidaceae; g__Bacteroides; s__Bacteroides acidifaciens	77905		OTU_300	k__Bacteria; p__Firmicutes; c__Clostridia; o__Clostridiales; f__Lachnospiraceae; g__Marvinbryantia; s__uncultured bacterium	77		OTU_497	k__Bacteria; p__Firmicutes; c__Clostridia; o__Clostridiales; f__Lachnospiraceae; g__Lachnospiraceae NK4A136 group; s__Lachnospiraceae bacterium COE1	3		OTU_1176	k__Bacteria; p__Firmicutes; c__Clostridia; o__Clostridiales; f__Lachnospiraceae	2		OTU_854	k__Bacteria; p__Firmicutes; c__Erysipelotrichia; o__Erysipelotrichales; f__Erysipelotrichaceae; g__Faecalibaculum; s__Faecalibaculum rodentium	3		OTU_1069	k__Bacteria; p__Bacteroidetes; c__Bacteroidia; o__Bacteroidales	3		OTU_926	k__Bacteria; p__Bacteroidetes; c__Bacteroidia; o__Bacteroidales; f__Muribaculaceae; g__Muribaculum	2
OTU_22	k__Bacteria; p__Actinobacteria; c__Coriobacteriia; o__Coriobacteriales; f__Atopobiaceae; g__Coriobacteriaceae UCG-002; s__uncultured bacterium	16883		OTU_490	k__Bacteria; p__Tenericutes; c__Mollicutes; o__Mollicutes RF39	3		OTU_758	k__Bacteria; p__Bacteroidetes; c__Bacteroidia; o__Bacteroidales; f__Muribaculaceae	3		OTU_1328	k__Bacteria; p__Firmicutes; c__Clostridia; o__Clostridiales; f__Lachnospiraceae	3		OTU_1319	k__Bacteria; p__Firmicutes; c__Clostridia; o__Clostridiales; f__Ruminococcaceae; g__Ruminiclostridium 6	4		OTU_637	k__Bacteria; p__Bacteroidetes; c__Bacteroidia; o__Bacteroidales	2		OTU_420	k__Bacteria; p__Proteobacteria; c__Deltaproteobacteria; o__Desulfuromonadales; f__Geobacteraceae; g__Geobacter	7
OTU_7	k__Bacteria; p__Actinobacteria; c__Coriobacteriia; o__Coriobacteriales; f__Atopobiaceae; g__Coriobacteriaceae UCG-002; s__uncultured bacterium	48315		OTU_1011	k__Bacteria; p__Bacteroidetes; c__Bacteroidia; o__Chitinophagales; f__Saprospiraceae; g__Aureispira; s__uncultured Bacteroidetes bacterium	2		OTU_944	k__Bacteria; p__Firmicutes; c__Bacilli; o__Lactobacillales	2		OTU_1285	k__Bacteria	2		OTU_1306	k__Bacteria; p__Bacteroidetes; c__Bacteroidia; o__Bacteroidales	2		OTU_1222	k__Bacteria; p__Bacteroidetes; c__Bacteroidia; o__Bacteroidales	2		OTU_1165	k__Bacteria; p__Bacteroidetes; c__Bacteroidia; o__Bacteroidales; f__Muribaculaceae; g__uncultured bacterium; s__uncultured bacterium	4
OTU_10	k__Bacteria; p__Bacteroidetes; c__Bacteroidia; o__Bacteroidales; f__Muribaculaceae; g__uncultured bacterium; s__uncultured bacterium	51427		OTU_450	k__Bacteria; p__Proteobacteria; c__Gammaproteobacteria; o__Steroidobacterales; f__Steroidobacteraceae; g__Steroidobacter; s__uncultured bacterium	9		OTU_966	k__Bacteria; p__Chloroflexi; c__Gitt-GS-136	2		OTU_1183	k__Bacteria; p__Firmicutes	2		OTU_360	k__Bacteria; p__Bacteroidetes; c__Bacteroidia; o__Bacteroidales; f__Prevotellaceae; g__Prevotella 1; s__uncultured bacterium	8		OTU_968	k__Bacteria; p__Acidobacteria; c__Subgroup 6	2		OTU_924	k__Bacteria; p__Bacteroidetes; c__Bacteroidia; o__Bacteroidales; f__Muribaculaceae	6
OTU_12	k__Bacteria; p__Bacteroidetes; c__Bacteroidia; o__Bacteroidales; f__Muribaculaceae; g__uncultured bacterium; s__uncultured bacterium	41962		OTU_840	k__Bacteria; p__Firmicutes; c__Clostridia; o__Clostridiales; f__Lachnospiraceae	3		OTU_1323	k__Bacteria; p__Bacteroidetes; c__Bacteroidia; o__Bacteroidales; f__Muribaculaceae; g__uncultured bacterium; s__uncultured bacterium	2		OTU_550	k__Bacteria; p__Bacteroidetes; c__Bacteroidia; o__Bacteroidales; f__Rikenellaceae; g__Alistipes	3		OTU_1315	k__Bacteria; p__Firmicutes; c__Clostridia; o__Clostridiales; f__Clostridiaceae 1; g__Clostridium sensu stricto 1	2		OTU_547	k__Bacteria; p__Actinobacteria; c__Thermoleophilia; o__Gaiellales	3		OTU_1087	k__Bacteria; p__Bacteroidetes; c__Bacteroidia; o__Bacteroidales; f__Muribaculaceae; g__uncultured bacterium; s__uncultured bacterium	3
OTU_15	k__Bacteria; p__Firmicutes; c__Clostridia; o__Clostridiales; f__Peptostreptococcaceae; g__Romboutsia; s__uncultured bacterium	25231		OTU_797	k__Bacteria; p__Firmicutes; c__Clostridia; o__Clostridiales	7		OTU_967	k__Bacteria; p__Chloroflexi; c__Chloroflexia; o__Chloroflexales; f__Herpetosiphonaceae; g__Herpetosiphon; s__uncultured Chloroflexi bacterium	2		OTU_1263	k__Bacteria; p__Firmicutes; c__Clostridia; o__Clostridiales; f__Lachnospiraceae; g__uncultured; s__uncultured bacterium	3		OTU_897	k__Bacteria; p__Actinobacteria; c__Coriobacteriia; o__Coriobacteriales; f__Eggerthellaceae; g__Enterorhabdus; s__mouse gut metagenome	3		OTU_562	k__Bacteria; p__Firmicutes; c__Clostridia; o__Clostridiales; f__Lachnospiraceae; g__uncultured; s__Clostridium sp. Culture-27	9		OTU_465	k__Bacteria; p__Proteobacteria; c__Alphaproteobacteria; o__Rhodobacterales; f__Rhodobacteraceae	6
OTU_16	k__Bacteria; p__Bacteroidetes; c__Bacteroidia; o__Bacteroidales; f__Muribaculaceae; g__uncultured bacterium; s__uncultured bacterium	21436		OTU_1274	k__Bacteria; p__Firmicutes; c__Erysipelotrichia; o__Erysipelotrichales; f__Erysipelotrichaceae; g__Faecalibaculum; s__Faecalibaculum rodentium	2		OTU_1116	k__Bacteria; p__Bacteroidetes; c__Bacteroidia; o__Bacteroidales	4		OTU_665	k__Bacteria; p__Bacteroidetes; c__Bacteroidia; o__Bacteroidales; f__Tannerellaceae; g__Parabacteroides; s__Parabacteroides goldsteinii CL02T12C30	2		OTU_1122	k__Bacteria	2		OTU_339	k__Bacteria; p__Firmicutes; c__Clostridia; o__Clostridiales; f__Ruminococcaceae; g__Ruminococcaceae UCG-010	14		OTU_1180	k__Bacteria; p__Bacteroidetes; c__Bacteroidia; o__Bacteroidales; f__Muribaculaceae; g__uncultured bacterium; s__uncultured bacterium	3
OTU_46	k__Bacteria; p__Bacteroidetes; c__Bacteroidia; o__Bacteroidales; f__Muribaculaceae; g__uncultured bacterium; s__uncultured bacterium	11552		OTU_314	k__Bacteria; p__Bacteroidetes; c__Bacteroidia; o__Chitinophagales; f__Chitinophagaceae; g__Chitinophaga	10		OTU_990	k__Bacteria; p__Acidobacteria; c__Blastocatellia (Subgroup 4)	2		OTU_1007	k__Bacteria; p__Firmicutes; c__Erysipelotrichia; o__Erysipelotrichales; f__Erysipelotrichaceae; g__Erysipelatoclostridium; s__uncultured bacterium	3		OTU_670	k__Bacteria; p__Bacteroidetes; c__Bacteroidia; o__Bacteroidales	3		OTU_1333	k__Bacteria; p__Bacteroidetes; c__Bacteroidia; o__Bacteroidales	2		OTU_1134	k__Bacteria	2
OTU_19	k__Bacteria; p__Bacteroidetes; c__Bacteroidia; o__Bacteroidales; f__Muribaculaceae; g__Muribaculum; s__uncultured bacterium	16957		OTU_855	k__Bacteria	2		OTU_963	k__Bacteria; p__Bacteroidetes; c__Bacteroidia; o__Bacteroidales	2		OTU_994	k__Bacteria; p__Firmicutes; c__Negativicutes; o__Selenomonadales; f__Veillonellaceae; g__Megasphaera; s__uncultured bacterium	2		OTU_912	k__Bacteria; p__Actinobacteria; c__Actinobacteria; o__Propionibacteriales; f__Propionibacteriaceae; g__Cutibacterium; s__Propionibacterium sp. KPL1844	2		OTU_1106	k__Bacteria; p__Bacteroidetes; c__Bacteroidia; o__Bacteroidales; f__Muribaculaceae; g__uncultured bacterium; s__uncultured bacterium	3		OTU_788	k__Bacteria; p__Bacteroidetes; c__Bacteroidia; o__Bacteroidales; f__Muribaculaceae; g__uncultured bacterium; s__uncultured bacterium	2
OTU_8	k__Bacteria; p__Bacteroidetes; c__Bacteroidia; o__Bacteroidales; f__Prevotellaceae; g__Alloprevotella	37342		OTU_574	k__Bacteria; p__Firmicutes; c__Clostridia; o__Clostridiales; f__Clostridiales vadinBB60 group; g__uncultured bacterium; s__uncultured bacterium	5		OTU_970	k__Bacteria; p__Bacteroidetes; c__Bacteroidia; o__Bacteroidales; f__Muribaculaceae; g__uncultured bacterium; s__uncultured bacterium	2		OTU_885	k__Bacteria; p__Firmicutes; c__Clostridia; o__Clostridiales; f__Lachnospiraceae	2		OTU_1330	k__Bacteria	2		OTU_613	k__Bacteria; p__Firmicutes; c__Clostridia; o__Clostridiales	3		OTU_1226	k__Bacteria; p__Bacteroidetes; c__Bacteroidia; o__Bacteroidales	2
OTU_161	k__Bacteria; p__Firmicutes; c__Bacilli; o__Bacillales; f__Bacillaceae; g__Virgibacillus; s__uncultured bacterium	270		OTU_177	k__Bacteria; p__Epsilonbacteraeota; c__Campylobacteria; o__Campylobacterales; f__Arcobacteraceae; g__Arcobacter	112		OTU_1185	k__Bacteria; p__Bacteroidetes; c__Bacteroidia; o__Bacteroidales; f__Muribaculaceae	2		OTU_1043	k__Bacteria; p__Firmicutes; c__Erysipelotrichia; o__Erysipelotrichales; f__Erysipelotrichaceae; g__Ileibacterium; s__Erysipelotrichaceae bacterium NYU-BL-F16	2		OTU_470	k__Bacteria; p__Firmicutes; c__Negativicutes; o__Selenomonadales; f__Veillonellaceae; g__Veillonella	11		OTU_953	k__Bacteria; p__Bacteroidetes; c__Bacteroidia; o__Bacteroidales; f__Muribaculaceae; g__uncultured bacterium; s__uncultured bacterium	8		OTU_496	k__Bacteria; p__Firmicutes; c__Clostridia; o__Clostridiales; f__Ruminococcaceae; g__Fournierella	11
OTU_763	k__Bacteria; p__Bacteroidetes; c__Bacteroidia; o__Bacteroidales	1078		OTU_266	k__Bacteria; p__Firmicutes; c__Clostridia; o__Clostridiales; f__Ruminococcaceae; g__Anaerotruncus; s__uncultured bacterium	23		OTU_1113	k__Bacteria; p__Bacteroidetes; c__Bacteroidia; o__Sphingobacteriales; f__Sphingobacteriaceae; g__Olivibacter	2		OTU_714	k__Bacteria; p__Proteobacteria; c__Gammaproteobacteria; o__Cardiobacteriales; f__Cardiobacteriaceae; g__uncultured; s__uncultured bacterium	3		OTU_829	k__Bacteria; p__Bacteroidetes; c__Bacteroidia; o__Bacteroidales; f__Muribaculaceae; g__uncultured bacterium; s__uncultured bacterium	2		OTU_1093	k__Bacteria; p__Firmicutes; c__Clostridia; o__Clostridiales; f__Lachnospiraceae	2		OTU_690	k__Bacteria; p__Bacteroidetes; c__Bacteroidia; o__Bacteroidales; f__Muribaculaceae; g__uncultured bacterium; s__uncultured bacterium	3
OTU_51	k__Bacteria; p__Firmicutes; c__Clostridia; o__Clostridiales; f__Lachnospiraceae	5413		OTU_191	k__Bacteria; p__Proteobacteria; c__Alphaproteobacteria; o__Rhodobacterales; f__Rhodobacteraceae	115		OTU_971	k__Bacteria; p__Gemmatimonadetes; c__Longimicrobia; o__Longimicrobiales; f__Longimicrobiaceae; g__uncultured bacterium; s__uncultured bacterium	2		OTU_933	k__Bacteria; p__Firmicutes; c__Clostridia; o__Clostridiales; f__Lachnospiraceae	3		OTU_464	k__Bacteria; p__Bacteroidetes; c__Bacteroidia; o__Bacteroidales; f__Muribaculaceae	3		OTU_1194	k__Bacteria; p__Chloroflexi; c__Anaerolineae; o__Anaerolineales; f__Anaerolineaceae; g__uncultured; s__uncultured prokaryote	4		OTU_345	k__Bacteria; p__Firmicutes; c__Clostridia; o__Clostridiales; f__Ruminococcaceae; g__Butyricicoccus; s__Butyricicoccus pullicaecorum 1.2	9
OTU_11	k__Bacteria; p__Bacteroidetes; c__Bacteroidia; o__Bacteroidales; f__Bacteroidaceae; g__Bacteroides	83307		OTU_289	k__Bacteria; p__Firmicutes; c__Clostridia; o__Clostridiales; f__Lachnospiraceae; g__uncultured; s__uncultured bacterium	19		OTU_1121	k__Bacteria; p__Bacteroidetes; c__Bacteroidia; o__Bacteroidales; f__Rikenellaceae	2		OTU_1338	k__Bacteria	2		OTU_1291	k__Bacteria; p__Firmicutes; c__Clostridia; o__Clostridiales; f__Ruminococcaceae	2		OTU_1091	k__Bacteria; p__Firmicutes; c__Clostridia; o__Clostridiales; f__Lachnospiraceae; g__Blautia; s__Lachnospiraceae bacterium 28-4	2		OTU_929	k__Bacteria; p__Bacteroidetes; c__Bacteroidia; o__Bacteroidales; f__Muribaculaceae; g__uncultured bacterium; s__uncultured bacterium	2
OTU_18	k__Bacteria; p__Bacteroidetes; c__Bacteroidia; o__Bacteroidales; f__Tannerellaceae; g__Parabacteroides; s__Parabacteroides goldsteinii CL02T12C30	11726		OTU_319	k__Bacteria; p__Bacteroidetes; c__Bacteroidia; o__Flavobacteriales; f__Flavobacteriaceae; g__Tenacibaculum	20		OTU_1120	k__Bacteria; p__Firmicutes; c__Clostridia; o__Clostridiales; f__Family XI; g__Peptoniphilus	2		OTU_565	k__Bacteria; p__Bacteroidetes; c__Bacteroidia; o__Bacteroidales	3		OTU_601	k__Bacteria; p__Bacteroidetes; c__Bacteroidia; o__Bacteroidales; f__Muribaculaceae; g__uncultured bacterium; s__uncultured bacterium	2		OTU_1099	k__Bacteria; p__Bacteroidetes; c__Bacteroidia; o__Bacteroidales; f__Bacteroidaceae; g__Bacteroides	2		OTU_748	k__Bacteria; p__Bacteroidetes; c__Bacteroidia; o__Bacteroidales; f__Muribaculaceae; g__uncultured bacterium; s__uncultured bacterium	5
OTU_636	k__Bacteria; p__Bacteroidetes; c__Bacteroidia; o__Bacteroidales; f__Muribaculaceae	45		OTU_858	k__Bacteria; p__Actinobacteria; c__Actinobacteria; o__Bifidobacteriales; f__Bifidobacteriaceae; g__Bifidobacterium	2		OTU_1336	k__Bacteria; p__Actinobacteria; c__MB-A2-108	2		OTU_1026	k__Bacteria; p__Firmicutes; c__Clostridia; o__Clostridiales; f__Family XII; g__Fusibacter	2		OTU_610	k__Bacteria; p__Bacteroidetes; c__Bacteroidia; o__Bacteroidales; f__Muribaculaceae	2		OTU_772	k__Bacteria	2		OTU_673	k__Bacteria	2
OTU_732	k__Bacteria; p__Bacteroidetes; c__Bacteroidia; o__Bacteroidales; f__Muribaculaceae; g__uncultured bacterium; s__uncultured bacterium	1081		OTU_578	k__Bacteria; p__Proteobacteria; c__Gammaproteobacteria; o__Alteromonadales; f__Colwelliaceae; g__Colwellia	3		OTU_1322	k__Bacteria; p__Bacteroidetes; c__Bacteroidia; o__Bacteroidales; f__Rikenellaceae; g__Rikenellaceae RC9 gut group; s__uncultured bacterium	2		OTU_664	k__Bacteria; p__Bacteroidetes; c__Bacteroidia; o__Bacteroidales	2		OTU_611	k__Bacteria; p__Bacteroidetes; c__Bacteroidia; o__Bacteroidales; f__Bacteroidaceae; g__Bacteroides	3		OTU_290	k__Bacteria; p__Firmicutes; c__Clostridia; o__Clostridiales; f__Clostridiaceae 1; g__Candidatus Arthromitus; s__uncultured bacterium	16		OTU_702	k__Bacteria; p__Bacteroidetes; c__Bacteroidia; o__Bacteroidales	2
OTU_26	k__Bacteria; p__Bacteroidetes; c__Bacteroidia; o__Bacteroidales; f__Muribaculaceae; g__uncultured bacterium; s__uncultured bacterium	27894		OTU_981	k__Bacteria; p__Proteobacteria; c__Gammaproteobacteria; o__Oceanospirillales; f__Halomonadaceae; g__Halomonas	2		OTU_986	k__Bacteria; p__Bacteroidetes; c__Bacteroidia; o__Bacteroidales; f__Muribaculaceae; g__uncultured bacterium; s__uncultured bacterium	2		OTU_1028	k__Bacteria; p__Firmicutes; c__Erysipelotrichia; o__Erysipelotrichales; f__Erysipelotrichaceae; g__Dubosiella; s__uncultured Erysipelotrichales bacterium	2		OTU_407	k__Bacteria; p__Firmicutes; c__Clostridia; o__Clostridiales; f__Christensenellaceae	4		OTU_1101	k__Bacteria	2		OTU_494	k__Bacteria; p__Bacteroidetes; c__Bacteroidia; o__Bacteroidales; f__Muribaculaceae; g__uncultured bacterium; s__uncultured bacterium	3
OTU_78	k__Bacteria; p__Bacteroidetes; c__Bacteroidia; o__Bacteroidales; f__Muribaculaceae; g__uncultured bacterium; s__uncultured bacterium	4397		OTU_872	k__Bacteria; p__Bacteroidetes; c__Bacteroidia; o__Chitinophagales; f__Chitinophagaceae; g__Flavihumibacter; s__uncultured bacterium	2		OTU_645	k__Bacteria; p__Bacteroidetes; c__Bacteroidia; o__Bacteroidales; f__Muribaculaceae; g__uncultured bacterium; s__uncultured bacterium	2		OTU_886	k__Bacteria; p__Actinobacteria; c__Coriobacteriia; o__Coriobacteriales; f__Eggerthellaceae; g__Enterorhabdus	2		OTU_828	k__Bacteria	2		OTU_740	k__Bacteria; p__Bacteroidetes; c__Bacteroidia; o__Bacteroidales	2		OTU_823	k__Bacteria; p__Bacteroidetes; c__Bacteroidia; o__Bacteroidales; f__Muribaculaceae; g__uncultured bacterium; s__uncultured bacterium	2
OTU_17	k__Bacteria; p__Bacteroidetes; c__Bacteroidia; o__Bacteroidales; f__Muribaculaceae; g__uncultured bacterium; s__uncultured bacterium	50709		OTU_1157	k__Bacteria; p__Actinobacteria; c__Actinobacteria; o__Pseudonocardiales; f__Pseudonocardiaceae	2		OTU_987	k__Bacteria; p__Verrucomicrobia; c__Verrucomicrobiae; o__Verrucomicrobiales; f__Akkermansiaceae; g__Akkermansia; s__uncultured bacterium	4		OTU_659	k__Bacteria; p__Firmicutes; c__Clostridia; o__Clostridiales; f__Family XII; g__Fusibacter; s__uncultured bacterium	3		OTU_598	k__Bacteria; p__Tenericutes; c__Mollicutes; o__Mollicutes RF39	3		OTU_556	k__Bacteria; p__Firmicutes; c__Clostridia; o__Clostridiales; f__Lachnospiraceae	3		OTU_1307	k__Bacteria; p__Bacteroidetes; c__Bacteroidia; o__Bacteroidales; f__Muribaculaceae	2
OTU_25	k__Bacteria; p__Bacteroidetes; c__Bacteroidia; o__Bacteroidales; f__Rikenellaceae; g__Alistipes; s__uncultured bacterium	7765		OTU_568	k__Bacteria; p__Proteobacteria; c__Gammaproteobacteria; o__Betaproteobacteriales; f__Burkholderiaceae; g__Acidovorax	5		OTU_651	k__Bacteria; p__Actinobacteria; c__Actinobacteria; o__Corynebacteriales; f__Corynebacteriaceae; g__Corynebacterium 1; s__Corynebacterium casei	2		OTU_932	k__Bacteria; p__Bacteroidetes; c__Bacteroidia; o__Bacteroidales	2		OTU_1063	k__Bacteria	2		OTU_942	k__Bacteria; p__Firmicutes; c__Clostridia; o__Clostridiales; f__Lachnospiraceae	3		OTU_847	k__Bacteria; p__Bacteroidetes; c__Bacteroidia; o__Bacteroidales	5
OTU_666	k__Bacteria; p__Bacteroidetes; c__Bacteroidia; o__Bacteroidales; f__Muribaculaceae; g__uncultured bacterium; s__uncultured bacterium	114		OTU_449	k__Bacteria; p__Firmicutes; c__Clostridia; o__Clostridiales; f__Lachnospiraceae	9		OTU_1085	k__Bacteria	2		OTU_881	k__Bacteria; p__Bacteroidetes; c__Bacteroidia; o__Bacteroidales; f__Tannerellaceae; g__Parabacteroides	3		OTU_1143	k__Bacteria; p__Firmicutes; c__Clostridia; o__Clostridiales; f__Lachnospiraceae	3		OTU_455	k__Bacteria; p__Firmicutes; c__Clostridia; o__Clostridiales; f__Lachnospiraceae; g__Tyzzerella 3; s__unidentified	4		OTU_1321	k__Bacteria; p__Bacteroidetes; c__Bacteroidia; o__Bacteroidales; f__Muribaculaceae; g__uncultured bacterium; s__uncultured bacterium	2
OTU_14	k__Bacteria; p__Bacteroidetes; c__Bacteroidia; o__Bacteroidales; f__Muribaculaceae; g__uncultured bacterium; s__uncultured bacterium	22084		OTU_537	k__Bacteria	3		OTU_1311	k__Bacteria	4		OTU_517	k__Bacteria; p__Bacteroidetes; c__Bacteroidia; o__Bacteroidales	3		OTU_837	k__Bacteria; p__Bacteroidetes; c__Bacteroidia; o__Bacteroidales; f__Muribaculaceae; g__uncultured bacterium; s__uncultured bacterium	2		OTU_952	k__Bacteria; p__Bacteroidetes; c__Bacteroidia; o__Bacteroidales; f__Muribaculaceae; g__uncultured bacterium; s__uncultured bacterium	2		OTU_801	k__Bacteria; p__Firmicutes; c__Erysipelotrichia; o__Erysipelotrichales; f__Erysipelotrichaceae; g__Faecalibaculum; s__Faecalibaculum rodentium	3
OTU_49	k__Bacteria; p__Firmicutes; c__Erysipelotrichia; o__Erysipelotrichales; f__Erysipelotrichaceae; g__Dubosiella; s__uncultured bacterium	16691		OTU_853	k__Bacteria; p__Actinobacteria; c__Actinobacteria; o__Propionibacteriales; f__Nocardioidaceae; g__Nocardioides	3		OTU_499	k__Bacteria; p__Bacteroidetes; c__Bacteroidia; o__Bacteroidales; f__Muribaculaceae; g__uncultured bacterium; s__uncultured bacterium	7		OTU_1023	k__Bacteria; p__Firmicutes; c__Clostridia; o__Clostridiales; f__Lachnospiraceae	2		OTU_1062	k__Bacteria; p__Firmicutes; c__Clostridia; o__Clostridiales; f__Family XIII; g__Family XIII AD3011 group; s__uncultured bacterium	3		OTU_1196	k__Bacteria; p__Bacteroidetes; c__Bacteroidia; o__Bacteroidales; f__Bacteroidaceae; g__Bacteroides	2		OTU_1179	k__Bacteria; p__Bacteroidetes; c__Bacteroidia; o__Bacteroidales	2
OTU_24	k__Bacteria; p__Bacteroidetes; c__Bacteroidia; o__Bacteroidales; f__Rikenellaceae; g__Alistipes	13370		OTU_871	k__Bacteria; p__Firmicutes; c__Clostridia; o__Clostridiales; f__Lachnospiraceae	5		OTU_1086	k__Bacteria; p__Bacteroidetes; c__Bacteroidia; o__Flavobacteriales; f__Flavobacteriaceae; g__Flavobacterium	2		OTU_1025	k__Bacteria; p__Actinobacteria; c__Actinobacteria	2		OTU_1181	k__Bacteria; p__Proteobacteria; c__Deltaproteobacteria; o__Desulfovibrionales; f__Desulfovibrionaceae	2		OTU_1141	k__Bacteria; p__Bacteroidetes; c__Bacteroidia; o__Bacteroidales	2		OTU_1212	k__Bacteria; p__Proteobacteria; c__Deltaproteobacteria; o__Desulfovibrionales; f__Desulfovibrionaceae; g__uncultured; s__uncultured bacterium	4
OTU_9	k__Bacteria; p__Firmicutes; c__Clostridia; o__Clostridiales; f__Lachnospiraceae; g__Blautia; s__Lachnospiraceae bacterium 28-4	57253		OTU_789	k__Bacteria; p__Bacteroidetes; c__Bacteroidia; o__Bacteroidales	8		OTU_430	k__Bacteria; p__Firmicutes; c__Bacilli; o__Bacillales; f__Bacillaceae; g__Bacillus	7		OTU_730	k__Bacteria; p__Firmicutes; c__Clostridia; o__Clostridiales	3		OTU_1187	k__Bacteria; p__Bacteroidetes; c__Bacteroidia; o__Bacteroidales; f__Muribaculaceae; g__uncultured bacterium; s__uncultured bacterium	3		OTU_498	k__Bacteria	3		OTU_761	k__Bacteria; p__Firmicutes; c__Erysipelotrichia; o__Erysipelotrichales; f__Erysipelotrichaceae; g__Faecalibaculum; s__Faecalibaculum rodentium	2
OTU_65	k__Bacteria; p__Bacteroidetes; c__Bacteroidia; o__Bacteroidales; f__Muribaculaceae	4242		OTU_995	k__Bacteria; p__Firmicutes; c__Clostridia; o__Clostridiales; f__Lachnospiraceae	4		OTU_649	k__Bacteria; p__Bacteroidetes; c__Bacteroidia; o__Bacteroidales	2		OTU_722	k__Bacteria; p__Chloroflexi; c__Chloroflexia; o__Thermomicrobiales; f__JG30-KF-CM45	2		OTU_838	k__Bacteria; p__Bacteroidetes; c__Bacteroidia; o__Bacteroidales; f__Muribaculaceae; g__uncultured bacterium; s__uncultured bacterium	2		OTU_747	k__Bacteria; p__Firmicutes; c__Clostridia; o__Clostridiales	2		OTU_1280	k__Bacteria; p__Bacteroidetes; c__Bacteroidia; o__Bacteroidales; f__Muribaculaceae	2
OTU_70	k__Bacteria; p__Bacteroidetes; c__Bacteroidia; o__Bacteroidales; f__Muribaculaceae; g__uncultured bacterium; s__uncultured bacterium	3065		OTU_793	k__Bacteria; p__Firmicutes; c__Clostridia; o__Clostridiales; f__Ruminococcaceae	2		OTU_992	k__Bacteria; p__Chloroflexi; c__Chloroflexia; o__Thermomicrobiales; f__JG30-KF-CM45; g__uncultured bacterium; s__uncultured bacterium	3		OTU_1010	k__Bacteria; p__Proteobacteria; c__Gammaproteobacteria; o__Pseudomonadales; f__Moraxellaceae; g__Psychrobacter	2		OTU_1331	k__Bacteria; p__Bacteroidetes; c__Bacteroidia; o__Bacteroidales	2		OTU_1139	k__Bacteria	2		OTU_427	k__Bacteria; p__Firmicutes; c__Clostridia; o__Clostridiales; f__Ruminococcaceae	7
OTU_777	k__Bacteria; p__Bacteroidetes; c__Bacteroidia; o__Bacteroidales; f__Muribaculaceae; g__uncultured bacterium; s__uncultured bacterium	288		OTU_792	k__Bacteria	2		OTU_534	k__Bacteria; p__Proteobacteria; c__Gammaproteobacteria; o__Betaproteobacteriales; f__Burkholderiaceae; g__Sphaerotilus; s__uncultured bacterium	7		OTU_724	k__Bacteria	2		OTU_1184	k__Bacteria	3		OTU_791	k__Bacteria; p__Firmicutes; c__Clostridia; o__Clostridiales; f__Lachnospiraceae	2		OTU_426	k__Bacteria; p__Firmicutes; c__Clostridia; o__Clostridiales; f__Ruminococcaceae; g__[Eubacterium] coprostanoligenes group	11
OTU_928	k__Bacteria; p__Bacteroidetes; c__Bacteroidia; o__Bacteroidales	95		OTU_445	k__Bacteria; p__Firmicutes; c__Clostridia; o__Clostridiales; f__Ruminococcaceae	12		OTU_474	k__Bacteria; p__Bacteroidetes; c__Bacteroidia; o__Bacteroidales	13		OTU_1266	k__Bacteria; p__Firmicutes; c__Clostridia; o__Clostridiales	2		OTU_1100	k__Bacteria; p__Bacteroidetes; c__Bacteroidia; o__Bacteroidales; f__Muribaculaceae; g__uncultured bacterium; s__uncultured bacterium	2		OTU_1269	k__Bacteria; p__Firmicutes; c__Clostridia; o__Clostridiales; f__Ruminococcaceae	3		OTU_938	k__Bacteria	2
OTU_28	k__Bacteria; p__Firmicutes; c__Clostridia; o__Clostridiales; f__Lachnospiraceae; g__Lachnospiraceae NK4A136 group	9238		OTU_1335	k__Bacteria; p__Firmicutes; c__Clostridia; o__Clostridiales; f__Ruminococcaceae	2		OTU_1117	k__Bacteria; p__Planctomycetes; c__OM190	3		OTU_1029	k__Bacteria; p__Firmicutes; c__Clostridia; o__Clostridiales; f__Lachnospiraceae; g__Lachnospiraceae NK4A136 group	3		OTU_833	k__Bacteria; p__Firmicutes; c__Clostridia; o__Clostridiales; f__Ruminococcaceae; g__Anaerotruncus; s__Anaerotruncus colihominis DSM 17241	2		OTU_1252	k__Bacteria; p__Bacteroidetes; c__Bacteroidia; o__Bacteroidales	2		OTU_612	k__Bacteria; p__Bacteroidetes; c__Bacteroidia; o__Bacteroidales; f__Muribaculaceae; g__uncultured bacterium; s__uncultured bacterium	3
OTU_200	k__Bacteria; p__Bacteroidetes; c__Bacteroidia; o__Bacteroidales; f__Muribaculaceae; g__uncultured bacterium; s__uncultured bacterium	2269		OTU_1020	k__Bacteria	2		OTU_625	k__Bacteria	2		OTU_1218	k__Bacteria; p__Firmicutes; c__Clostridia; o__Clostridiales; f__Lachnospiraceae; g__Lachnospiraceae NK4A136 group; s__Clostridiales bacterium CIEAF 020	2		OTU_1056	k__Bacteria; p__Bacteroidetes; c__Bacteroidia; o__Bacteroidales; f__Muribaculaceae; g__uncultured bacterium; s__uncultured bacterium	2		OTU_1083	k__Bacteria; p__Firmicutes; c__Clostridia; o__Clostridiales; f__Ruminococcaceae; g__Ruminiclostridium 9	2		OTU_627	k__Bacteria; p__Bacteroidetes; c__Bacteroidia; o__Bacteroidales	2
OTU_364	k__Bacteria; p__Bacteroidetes; c__Bacteroidia; o__Bacteroidales; f__Muribaculaceae	1030		OTU_869	k__Bacteria; p__Firmicutes; c__Clostridia; o__Clostridiales; f__Lachnospiraceae	3		OTU_552	k__Bacteria; p__Proteobacteria; c__Gammaproteobacteria; o__Betaproteobacteriales; f__SC-I-84	5		OTU_936	k__Bacteria	2		OTU_1090	k__Bacteria; p__Firmicutes; c__Clostridia; o__Clostridiales; f__Lachnospiraceae; g__Lachnospiraceae AC2044 group; s__uncultured bacterium	4		OTU_1288	k__Bacteria	2		OTU_535	k__Bacteria; p__Firmicutes; c__Clostridia; o__Clostridiales; f__Ruminococcaceae; g__Anaerofilum; s__uncultured bacterium	8
OTU_1061	k__Bacteria; p__Bacteroidetes; c__Bacteroidia; o__Bacteroidales; f__Muribaculaceae; g__uncultured bacterium; s__uncultured bacterium	184		OTU_1203	k__Bacteria; p__Firmicutes; c__Clostridia; o__Clostridiales; f__Lachnospiraceae; g__uncultured; s__Clostridium sp. Culture-54	2		OTU_1115	k__Bacteria; p__Bacteroidetes; c__Bacteroidia; o__Bacteroidales; f__Bacteroidaceae; g__Bacteroides; s__uncultured Bacteroides sp.	3		OTU_1326	k__Bacteria	2		OTU_1054	k__Bacteria	3		OTU_1094	k__Bacteria	2		OTU_667	k__Bacteria; p__Bacteroidetes; c__Bacteroidia; o__Bacteroidales; f__Muribaculaceae	2
OTU_1339	k__Bacteria; p__Bacteroidetes; c__Bacteroidia; o__Bacteroidales; f__Muribaculaceae	217		OTU_1192	k__Bacteria; p__Bacteroidetes; c__Bacteroidia; o__Bacteroidales; f__Muribaculaceae	2		OTU_1172	k__Bacteria; p__Proteobacteria; c__Gammaproteobacteria	2		OTU_387	k__Bacteria; p__Firmicutes; c__Clostridia; o__Clostridiales; f__Lachnospiraceae; g__uncultured	13		OTU_1055	k__Bacteria; p__Firmicutes; c__Clostridia; o__Clostridiales	2		OTU_1146	k__Bacteria; p__Firmicutes; c__Clostridia; o__Clostridiales; f__Ruminococcaceae	2		OTU_604	k__Bacteria; p__Bacteroidetes; c__Bacteroidia; o__Bacteroidales; f__Bacteroidaceae; g__Bacteroides; s__uncultured bacterium	2
OTU_33	k__Bacteria; p__Proteobacteria; c__Gammaproteobacteria; o__Enterobacteriales; f__Enterobacteriaceae; g__Escherichia-Shigella; s__Escherichia coli	5617		OTU_846	k__Bacteria; p__Bacteroidetes; c__Bacteroidia; o__Bacteroidales	2		OTU_588	k__Bacteria; p__Chloroflexi; c__Anaerolineae; o__RBG-13-54-9; f__uncultured sludge bacterium A31; g__uncultured sludge bacterium A31; s__uncultured sludge bacterium A31	3		OTU_699	k__Bacteria; p__Bacteroidetes; c__Bacteroidia; o__Bacteroidales; f__Muribaculaceae	2		OTU_718	k__Bacteria; p__Bacteroidetes; c__Bacteroidia; o__Bacteroidales; f__Muribaculaceae; g__Muribaculum; s__Parabacteroides sp. YL27	2		OTU_1275	k__Bacteria; p__Bacteroidetes; c__Bacteroidia; o__Bacteroidales; f__Bacteroidaceae; g__Bacteroides	2		OTU_844	k__Bacteria; p__Firmicutes; c__Clostridia; o__Clostridiales; f__Lachnospiraceae	2
OTU_458	k__Bacteria; p__Bacteroidetes; c__Bacteroidia; o__Bacteroidales; f__Muribaculaceae; g__uncultured bacterium; s__uncultured bacterium	39		OTU_753	k__Bacteria; p__Firmicutes; c__Clostridia; o__Clostridiales; f__Ruminococcaceae	2		OTU_958	k__Bacteria; p__Gemmatimonadetes; c__Gemmatimonadetes; o__Gemmatimonadales; f__Gemmatimonadaceae; g__uncultured; s__uncultured soil bacterium	7		OTU_684	k__Bacteria; p__Bacteroidetes; c__Bacteroidia; o__Bacteroidales	3		OTU_720	k__Bacteria	3		OTU_1318	k__Bacteria; p__Bacteroidetes; c__Bacteroidia; o__Bacteroidales	3
OTU_2	k__Bacteria; p__Bacteroidetes; c__Bacteroidia; o__Bacteroidales; f__Rikenellaceae; g__Rikenellaceae RC9 gut group; s__uncultured bacterium	126018		OTU_614	k__Bacteria; p__Firmicutes; c__Clostridia; o__Clostridiales; f__Lachnospiraceae; g__uncultured; s__uncultured bacterium	6		OTU_960	k__Bacteria; p__Bacteroidetes; c__Bacteroidia; o__Bacteroidales	3		OTU_1030	k__Bacteria; p__Bacteroidetes; c__Bacteroidia; o__Bacteroidales; f__Bacteroidaceae; g__Bacteroides; s__Bacteroides acidifaciens JCM 10556	2		OTU_1060	k__Bacteria; p__Firmicutes; c__Clostridia; o__Clostridiales	2		OTU_492	k__Bacteria; p__Bacteroidetes; c__Bacteroidia; o__Bacteroidales; f__Muribaculaceae; g__uncultured bacterium; s__uncultured bacterium	3
OTU_31	k__Bacteria; p__Deferribacteres; c__Deferribacteres; o__Deferribacterales; f__Deferribacteraceae; g__Mucispirillum	5236		OTU_516	k__Bacteria; p__Bacteroidetes; c__Bacteroidia; o__Bacteroidales	3		OTU_1163	k__Bacteria	2		OTU_1199	k__Bacteria; p__Bacteroidetes; c__Bacteroidia; o__Bacteroidales; f__Muribaculaceae	2		OTU_1088	k__Bacteria; p__Firmicutes; c__Clostridia; o__Clostridiales	2		OTU_955	k__Bacteria; p__Bacteroidetes; c__Bacteroidia; o__Bacteroidales	2
OTU_60	k__Bacteria; p__Actinobacteria; c__Actinobacteria; o__Bifidobacteriales; f__Bifidobacteriaceae; g__Bifidobacterium; s__uncultured bacterium	2907		OTU_1286	k__Bacteria; p__Firmicutes; c__Erysipelotrichia; o__Erysipelotrichales; f__Erysipelotrichaceae; g__Dubosiella; s__uncultured Erysipelotrichales bacterium	2		OTU_438	k__Bacteria; p__Actinobacteria; c__Acidimicrobiia; o__Microtrichales; f__Ilumatobacteraceae; g__CL500-29 marine group; s__metagenome	5		OTU_707	k__Bacteria; p__Bacteroidetes; c__Bacteroidia; o__Bacteroidales	2		OTU_624	k__Bacteria; p__Bacteroidetes; c__Bacteroidia; o__Bacteroidales	2		OTU_954	k__Bacteria; p__Bacteroidetes; c__Bacteroidia; o__Bacteroidales; f__Muribaculaceae	2
OTU_119	k__Bacteria; p__Firmicutes; c__Clostridia; o__Clostridiales; f__Ruminococcaceae; g__Anaerotruncus	342		OTU_538	k__Bacteria; p__Proteobacteria; c__Alphaproteobacteria; o__Acetobacterales; f__Acetobacteraceae	4		OTU_1109	k__Bacteria; p__Bacteroidetes; c__Bacteroidia; o__Bacteroidales; f__Muribaculaceae; g__uncultured bacterium; s__uncultured bacterium	2		OTU_708	k__Bacteria; p__Rokubacteria; c__NC10; o__Rokubacteriales; f__metagenome; g__metagenome; s__metagenome	2		OTU_622	k__Bacteria; p__Firmicutes; c__Clostridia; o__Clostridiales; f__Lachnospiraceae	2		OTU_1145	k__Bacteria	2
OTU_943	k__Bacteria; p__Bacteroidetes; c__Bacteroidia; o__Bacteroidales; f__Muribaculaceae; g__uncultured bacterium; s__uncultured bacterium	187		OTU_845	k__Bacteria; p__Firmicutes; c__Clostridia; o__Clostridiales; f__Ruminococcaceae	2		OTU_1206	k__Bacteria; p__Bacteroidetes; c__Bacteroidia; o__Bacteroidales; f__Muribaculaceae	2		OTU_880	k__Bacteria; p__Firmicutes; c__Clostridia; o__Clostridiales; f__Lachnospiraceae	2		OTU_620	k__Bacteria; p__Firmicutes; c__Clostridia; o__Clostridiales; f__Lachnospiraceae	2		OTU_1178	k__Bacteria; p__Bacteroidetes; c__Bacteroidia; o__Bacteroidales; f__Muribaculaceae; g__uncultured bacterium; s__uncultured bacterium	3
OTU_102	k__Bacteria; p__Firmicutes; c__Bacilli; o__Lactobacillales; f__Streptococcaceae; g__Streptococcus	530		OTU_1186	k__Bacteria	2		OTU_691	k__Bacteria; p__Bacteroidetes; c__Bacteroidia; o__Bacteroidales	2		OTU_894	k__Bacteria; p__Firmicutes	2		OTU_1097	k__Bacteria; p__Firmicutes; c__Clostridia; o__Clostridiales; f__Lachnospiraceae; g__uncultured; s__uncultured bacterium	2		OTU_1082	k__Bacteria; p__Bacteroidetes; c__Bacteroidia; o__Bacteroidales; f__Muribaculaceae	2
OTU_410	k__Bacteria; p__Bacteroidetes; c__Bacteroidia; o__Bacteroidales; f__Muribaculaceae; g__uncultured bacterium; s__uncultured bacterium	720		OTU_906	k__Bacteria; p__Bacteroidetes; c__Bacteroidia; o__Bacteroidales; f__Muribaculaceae; g__uncultured bacterium; s__uncultured bacterium	2		OTU_1262	k__Bacteria; p__Acidobacteria; c__Subgroup 6	2		OTU_887	k__Bacteria; p__Bacteroidetes; c__Bacteroidia; o__Bacteroidales	3		OTU_725	k__Bacteria	2
OTU_989	k__Bacteria; p__Bacteroidetes; c__Bacteroidia; o__Bacteroidales; f__Muribaculaceae; g__uncultured bacterium; s__uncultured bacterium	520		OTU_843	k__Bacteria; p__Firmicutes; c__Clostridia; o__Clostridiales; f__Ruminococcaceae; g__Oscillibacter	3		OTU_674	k__Bacteria; p__Bacteroidetes; c__Bacteroidia; o__Bacteroidales	2		OTU_888	k__Bacteria; p__Firmicutes; c__Erysipelotrichia; o__Erysipelotrichales; f__Erysipelotrichaceae; g__Faecalibaculum; s__Faecalibaculum rodentium	2		OTU_957	k__Bacteria; p__Firmicutes; c__Clostridia; o__Clostridiales; f__Ruminococcaceae; g__Ruminiclostridium 5	2
OTU_341	k__Bacteria; p__Bacteroidetes; c__Bacteroidia; o__Bacteroidales; f__Muribaculaceae; g__uncultured bacterium; s__uncultured bacterium	1386		OTU_909	k__Bacteria	2		OTU_1154	k__Bacteria	2		OTU_1305	k__Bacteria; p__Bacteroidetes; c__Bacteroidia; o__Bacteroidales; f__Tannerellaceae; g__Parabacteroides	5
OTU_397	k__Bacteria; p__Bacteroidetes; c__Bacteroidia; o__Bacteroidales; f__Muribaculaceae; g__uncultured bacterium; s__uncultured bacterium	271		OTU_1257	k__Bacteria; p__Firmicutes; c__Clostridia; o__Clostridiales; f__Lachnospiraceae; g__A2; s__uncultured bacterium	3		OTU_1123	k__Bacteria; p__Bacteroidetes; c__Bacteroidia; o__Bacteroidales	2		OTU_735	k__Bacteria; p__Proteobacteria; c__Gammaproteobacteria; o__Enterobacteriales; f__Enterobacteriaceae	2
OTU_850	k__Bacteria; p__Bacteroidetes; c__Bacteroidia; o__Bacteroidales; f__Muribaculaceae; g__uncultured bacterium; s__uncultured bacterium	652		OTU_1167	k__Bacteria; p__Bacteroidetes; c__Bacteroidia; o__Bacteroidales; f__Muribaculaceae	2		OTU_679	k__Bacteria; p__Bacteroidetes; c__Bacteroidia; o__Bacteroidales; f__Muribaculaceae	2
OTU_654	k__Bacteria; p__Bacteroidetes; c__Bacteroidia; o__Bacteroidales; f__Muribaculaceae; g__uncultured bacterium; s__uncultured bacterium	81		OTU_460	k__Bacteria; p__Firmicutes; c__Clostridia; o__Clostridiales; f__Lachnospiraceae	3		OTU_1111	k__Bacteria; p__Bacteroidetes; c__Bacteroidia; o__Flavobacteriales; f__Flavobacteriaceae; g__Flavobacterium	2
OTU_55	k__Bacteria; p__Bacteroidetes; c__Bacteroidia; o__Bacteroidales; f__Muribaculaceae; g__uncultured bacterium; s__uncultured bacterium	6675		OTU_1035	k__Bacteria; p__Firmicutes; c__Clostridia; o__Clostridiales; f__Ruminococcaceae	3		OTU_519	k__Bacteria; p__Bacteroidetes; c__Bacteroidia; o__Bacteroidales	3
OTU_694	k__Bacteria; p__Bacteroidetes; c__Bacteroidia; o__Bacteroidales; f__Muribaculaceae; g__uncultured bacterium; s__uncultured bacterium	770		OTU_1267	k__Bacteria; p__Firmicutes; c__Clostridia; o__Clostridiales; f__Lachnospiraceae	2		OTU_1017	k__Bacteria; p__Bacteroidetes; c__Bacteroidia; o__Bacteroidales; f__Muribaculaceae; g__uncultured bacterium; s__uncultured bacterium	2
OTU_63	k__Bacteria; p__Bacteroidetes; c__Bacteroidia; o__Bacteroidales; f__Muribaculaceae	7678		OTU_531	k__Bacteria; p__Firmicutes; c__Clostridia; o__Clostridiales; f__Lachnospiraceae	3		OTU_1015	k__Bacteria; p__Bacteroidetes; c__Bacteroidia; o__Bacteroidales; f__Muribaculaceae	2
OTU_505	k__Bacteria; p__Bacteroidetes; c__Bacteroidia; o__Bacteroidales; f__Muribaculaceae; g__uncultured bacterium; s__uncultured bacterium	1159		OTU_765	k__Bacteria; p__Bacteroidetes; c__Bacteroidia	2		OTU_983	k__Bacteria; p__Bacteroidetes; c__Bacteroidia; o__Bacteroidales; f__Muribaculaceae; g__uncultured bacterium; s__uncultured bacterium	2
OTU_628	k__Bacteria; p__Bacteroidetes; c__Bacteroidia; o__Bacteroidales; f__Muribaculaceae; g__uncultured bacterium; s__uncultured bacterium	1014		OTU_461	k__Bacteria; p__Firmicutes; c__Clostridia; o__Clostridiales; f__Ruminococcaceae	3		OTU_984	k__Bacteria; p__Bacteroidetes; c__Bacteroidia; o__Bacteroidales; f__Muribaculaceae; g__uncultured bacterium; s__uncultured bacterium	2
OTU_1014	k__Bacteria; p__Bacteroidetes; c__Bacteroidia; o__Bacteroidales; f__Muribaculaceae; g__uncultured bacterium; s__uncultured bacterium	870		OTU_781	k__Bacteria; p__Firmicutes; c__Clostridia; o__Clostridiales; f__Lachnospiraceae	2		OTU_1295	k__Bacteria; p__Actinobacteria; c__Coriobacteriia; o__Coriobacteriales; f__Atopobiaceae; g__Coriobacteriaceae UCG-002; s__uncultured bacterium	2
OTU_6	k__Bacteria; p__Firmicutes; c__Erysipelotrichia; o__Erysipelotrichales; f__Erysipelotrichaceae; g__Ileibacterium; s__Erysipelotrichaceae bacterium NYU-BL-F16	52733		OTU_1325	k__Bacteria; p__Firmicutes; c__Clostridia; o__Clostridiales	2		OTU_979	k__Bacteria; p__Bacteroidetes; c__Bacteroidia; o__Bacteroidales; f__Muribaculaceae; g__uncultured bacterium; s__uncultured bacterium	2
OTU_27	k__Bacteria; p__Bacteroidetes; c__Bacteroidia; o__Bacteroidales; f__Tannerellaceae; g__Parabacteroides	4898		OTU_996	k__Bacteria; p__Firmicutes; c__Clostridia; o__Clostridiales; f__Lachnospiraceae	2		OTU_849	k__Bacteria; p__Bacteroidetes; c__Bacteroidia; o__Bacteroidales; f__Muribaculaceae; g__uncultured bacterium; s__uncultured bacterium	2
OTU_48	k__Bacteria; p__Firmicutes; c__Clostridia; o__Clostridiales; f__Clostridiaceae 1; g__Clostridium sensu stricto 1; s__uncultured bacterium	4487		OTU_997	k__Bacteria	2		OTU_543	k__Bacteria; p__Bacteroidetes; c__Bacteroidia; o__Bacteroidales; f__Muribaculaceae; g__uncultured bacterium; s__uncultured bacterium	3
OTU_506	k__Bacteria; p__Bacteroidetes; c__Bacteroidia; o__Bacteroidales	896		OTU_779	k__Bacteria; p__Bacteroidetes; c__Bacteroidia; o__Bacteroidales; f__Muribaculaceae; g__uncultured bacterium; s__uncultured bacterium	2
OTU_281	k__Bacteria; p__Firmicutes; c__Erysipelotrichia; o__Erysipelotrichales; f__Erysipelotrichaceae; g__Dubosiella	145		OTU_780	k__Bacteria; p__Firmicutes; c__Clostridia; o__Clostridiales; f__Lachnospiraceae	2
OTU_767	k__Bacteria; p__Bacteroidetes; c__Bacteroidia; o__Bacteroidales; f__Muribaculaceae; g__uncultured bacterium; s__uncultured bacterium	455		OTU_451	k__Bacteria; p__Proteobacteria; c__Alphaproteobacteria; o__Rhizobiales; f__Beijerinckiaceae	8
OTU_32	k__Bacteria; p__Firmicutes; c__Clostridia; o__Clostridiales; f__Ruminococcaceae; g__Intestinimonas; s__uncultured bacterium	6513		OTU_916	k__Bacteria; p__Firmicutes; c__Clostridia; o__Clostridiales; f__Lachnospiraceae	3
OTU_68	k__Bacteria; p__Proteobacteria; c__Gammaproteobacteria; o__Oceanospirillales; f__Halomonadaceae; g__Halomonas	1149		OTU_1024	k__Bacteria; p__Bacteroidetes; c__Bacteroidia; o__Bacteroidales; f__Rikenellaceae; g__Alistipes	2
OTU_545	k__Bacteria; p__Bacteroidetes; c__Bacteroidia; o__Bacteroidales; f__Muribaculaceae; g__uncultured bacterium; s__uncultured bacterium	1258		OTU_768	k__Bacteria; p__Firmicutes; c__Clostridia; o__Clostridiales; f__Ruminococcaceae	2
OTU_1309	k__Bacteria	94		OTU_1234	k__Bacteria; p__Firmicutes; c__Clostridia; o__Clostridiales; f__Lachnospiraceae	2
OTU_481	k__Bacteria; p__Bacteroidetes; c__Bacteroidia; o__Bacteroidales; f__Muribaculaceae	565		OTU_919	k__Bacteria; p__Firmicutes; c__Clostridia; o__Clostridiales; f__Lachnospiraceae	2
OTU_54	k__Bacteria; p__Firmicutes; c__Clostridia; o__Clostridiales; f__Lachnospiraceae; g__Lachnoclostridium; s__uncultured bacterium	4467		OTU_1317	k__Bacteria; p__Firmicutes; c__Clostridia; o__Clostridiales; f__Ruminococcaceae; g__uncultured	2
OTU_109	k__Bacteria; p__Actinobacteria; c__Coriobacteriia; o__Coriobacteriales; f__Eggerthellaceae; g__Enterorhabdus	1335		OTU_810	k__Bacteria	4
OTU_959	k__Bacteria; p__Bacteroidetes; c__Bacteroidia; o__Bacteroidales; f__Muribaculaceae; g__uncultured bacterium; s__uncultured bacterium	56		OTU_1161	k__Bacteria; p__Firmicutes; c__Clostridia; o__Clostridiales; f__Family XI; g__Finegoldia; s__uncultured bacterium	3
OTU_592	k__Bacteria; p__Bacteroidetes; c__Bacteroidia; o__Bacteroidales; f__Muribaculaceae; g__uncultured bacterium; s__uncultured bacterium	122		OTU_536	k__Bacteria; p__Bacteroidetes; c__Bacteroidia; o__Bacteroidales; f__Muribaculaceae; g__uncultured bacterium; s__uncultured bacterium	3
OTU_95	k__Bacteria; p__Firmicutes; c__Clostridia; o__Clostridiales; f__Ruminococcaceae; g__UBA1819; s__uncultured organism	620		OTU_1316	k__Bacteria	2
OTU_662	k__Bacteria; p__Firmicutes; c__Erysipelotrichia; o__Erysipelotrichales; f__Erysipelotrichaceae; g__Faecalibaculum; s__uncultured bacterium	4680		OTU_207	k__Bacteria; p__Firmicutes; c__Clostridia; o__Clostridiales; f__Ruminococcaceae; g__Ruminococcaceae UCG-014; s__uncultured bacterium	66
OTU_429	k__Bacteria; p__Bacteroidetes; c__Bacteroidia; o__Bacteroidales; f__Muribaculaceae	365		OTU_657	k__Bacteria; p__Firmicutes; c__Clostridia; o__Clostridiales; f__Lachnospiraceae; g__Lachnospiraceae NK4A136 group	16
OTU_503	k__Bacteria; p__Bacteroidetes; c__Bacteroidia; o__Bacteroidales; f__Muribaculaceae; g__uncultured bacterium; s__uncultured bacterium	188		OTU_1195	k__Bacteria	2
OTU_567	k__Bacteria; p__Bacteroidetes; c__Bacteroidia; o__Bacteroidales; f__Muribaculaceae; g__uncultured bacterium; s__uncultured bacterium	869		OTU_1224	k__Bacteria; p__Firmicutes; c__Clostridia; o__Clostridiales; f__Lachnospiraceae	5
OTU_409	k__Bacteria; p__Bacteroidetes; c__Bacteroidia; o__Bacteroidales; f__Muribaculaceae; g__uncultured Bacteroidales bacterium; s__uncultured Bacteroidales bacterium	3553		OTU_776	k__Bacteria; p__Firmicutes; c__Erysipelotrichia; o__Erysipelotrichales; f__Erysipelotrichaceae; g__Dubosiella	2
OTU_307	k__Bacteria; p__Firmicutes; c__Clostridia; o__Clostridiales; f__Lachnospiraceae; g__Anaerostipes	23		OTU_376	k__Bacteria; p__Firmicutes; c__Clostridia; o__Clostridiales; f__Family XIII	8
OTU_35	k__Bacteria; p__Firmicutes; c__Clostridia; o__Clostridiales; f__Ruminococcaceae	21392		OTU_860	k__Bacteria; p__Firmicutes; c__Clostridia; o__Clostridiales	2
OTU_42	k__Bacteria; p__Firmicutes; c__Clostridia; o__Clostridiales; f__Lachnospiraceae	6133		OTU_1155	k__Bacteria; p__Firmicutes; c__Clostridia; o__Clostridiales	2
OTU_187	k__Bacteria; p__Firmicutes; c__Erysipelotrichia; o__Erysipelotrichales; f__Erysipelotrichaceae; g__Erysipelatoclostridium; s__unidentified	81		OTU_785	k__Bacteria; p__Chloroflexi; c__AD3; o__uncultured bacterium; f__uncultured bacterium; g__uncultured bacterium; s__uncultured bacterium	2
OTU_171	k__Bacteria; p__Proteobacteria; c__Gammaproteobacteria; o__Enterobacteriales; f__Enterobacteriaceae; g__Citrobacter	244		OTU_406	k__Bacteria; p__Firmicutes; c__Clostridia; o__Clostridiales	4
OTU_1058	k__Bacteria; p__Bacteroidetes; c__Bacteroidia; o__Bacteroidales; f__Muribaculaceae; g__uncultured bacterium; s__uncultured bacterium	488		OTU_1038	k__Bacteria; p__Firmicutes; c__Clostridia; o__Clostridiales; f__Lachnospiraceae	10
OTU_590	k__Bacteria; p__Bacteroidetes; c__Bacteroidia; o__Bacteroidales; f__Muribaculaceae; g__uncultured bacterium; s__uncultured bacterium	209		OTU_1278	k__Bacteria; p__Actinobacteria; c__Coriobacteriia; o__Coriobacteriales; f__Eggerthellaceae; g__Enterorhabdus; s__uncultured bacterium	5
OTU_136	k__Bacteria; p__Firmicutes; c__Clostridia; o__Clostridiales; f__Lachnospiraceae; g__Lachnospiraceae NK4A136 group; s__uncultured bacterium	545		OTU_814	k__Bacteria; p__Actinobacteria; c__Thermoleophilia; o__Gaiellales; f__uncultured	2
OTU_442	k__Bacteria; p__Bacteroidetes; c__Bacteroidia; o__Bacteroidales; f__Muribaculaceae; g__uncultured bacterium; s__uncultured bacterium	1095		OTU_1205	k__Bacteria; p__Bacteroidetes; c__Bacteroidia; o__Bacteroidales	2
OTU_584	k__Bacteria; p__Bacteroidetes; c__Bacteroidia; o__Bacteroidales; f__Muribaculaceae; g__uncultured bacterium; s__uncultured bacterium	122		OTU_861	k__Bacteria	2
OTU_52	k__Bacteria; p__Firmicutes; c__Bacilli; o__Lactobacillales; f__Lactobacillaceae; g__Lactobacillus; s__Lactobacillus gasseri	2081		OTU_913	k__Bacteria; p__Firmicutes; c__Clostridia; o__Clostridiales; f__Lachnospiraceae; g__uncultured	4
OTU_1000	k__Bacteria; p__Bacteroidetes; c__Bacteroidia; o__Bacteroidales	311		OTU_859	k__Bacteria; p__Firmicutes; c__Clostridia; o__Clostridiales; f__Ruminococcaceae	2
OTU_122	k__Bacteria; p__Firmicutes; c__Bacilli; o__Lactobacillales; f__Lactobacillaceae; g__Lactobacillus; s__Lactobacillus murinus	353		OTU_512	k__Bacteria	4
OTU_291	k__Bacteria; p__Proteobacteria; c__Gammaproteobacteria; o__Betaproteobacteriales; f__Burkholderiaceae; g__Ralstonia; s__uncultured bacterium	30		OTU_806	k__Bacteria; p__Actinobacteria; c__Coriobacteriia; o__Coriobacteriales; f__Eggerthellaceae; g__Enterorhabdus; s__Enterorhabdus caecimuris B7	2
OTU_112	k__Bacteria; p__Firmicutes; c__Clostridia; o__Clostridiales; f__Lachnospiraceae; g__Lachnospiraceae NK4A136 group	1633		OTU_661	k__Bacteria; p__Firmicutes; c__Clostridia; o__Clostridiales; f__Lachnospiraceae	2
OTU_99	k__Bacteria; p__Bacteroidetes; c__Bacteroidia; o__Bacteroidales; f__Muribaculaceae; g__uncultured bacterium; s__uncultured bacterium	1698		OTU_865	k__Bacteria; p__Firmicutes; c__Clostridia; o__Clostridiales	5
OTU_703	k__Bacteria; p__Bacteroidetes; c__Bacteroidia; o__Bacteroidales; f__Muribaculaceae; g__uncultured bacterium; s__uncultured bacterium	1291		OTU_656	k__Bacteria; p__Bacteroidetes; c__Bacteroidia; o__Bacteroidales	2
OTU_262	k__Bacteria; p__Firmicutes; c__Clostridia; o__Clostridiales; f__Lachnospiraceae	59		OTU_804	k__Bacteria; p__Actinobacteria; c__Coriobacteriia; o__Coriobacteriales; f__Eggerthellaceae; g__Eggerthella; s__uncultured bacterium	2
OTU_138	k__Bacteria; p__Bacteroidetes; c__Bacteroidia; o__Bacteroidales; f__Muribaculaceae; g__uncultured bacterium; s__uncultured bacterium	390		OTU_701	k__Bacteria; p__Firmicutes; c__Erysipelotrichia; o__Erysipelotrichales; f__Erysipelotrichaceae; g__Dubosiella; s__uncultured bacterium	2
OTU_103	k__Bacteria; p__Firmicutes; c__Erysipelotrichia; o__Erysipelotrichales; f__Erysipelotrichaceae; g__Dubosiella; s__uncultured bacterium	641		OTU_1229	k__Bacteria; p__Firmicutes; c__Clostridia; o__Clostridiales; f__Lachnospiraceae	3
OTU_61	k__Bacteria; p__Firmicutes; c__Clostridia; o__Clostridiales; f__Ruminococcaceae; g__Flavonifractor; s__uncultured bacterium	2580		OTU_323	k__Bacteria; p__Bacteroidetes; c__Bacteroidia; o__Bacteroidales; f__Prevotellaceae; g__Prevotella 6; s__unidentified	13
OTU_900	k__Bacteria; p__Bacteroidetes; c__Bacteroidia; o__Bacteroidales; f__Muribaculaceae; g__uncultured bacterium; s__uncultured bacterium	805		OTU_295	k__Bacteria; p__Actinobacteria; c__Coriobacteriia; o__Coriobacteriales; f__Atopobiaceae; g__Atopobium; s__Atopobium sp. oral taxon 810 str. F0209	20
OTU_29	k__Bacteria; p__Firmicutes; c__Clostridia; o__Clostridiales; f__Ruminococcaceae; g__Intestinimonas; s__uncultured bacterium	12646		OTU_824	k__Bacteria; p__Firmicutes; c__Clostridia; o__Clostridiales	2
OTU_92	k__Bacteria; p__Actinobacteria; c__Coriobacteriia; o__Coriobacteriales; f__Eggerthellaceae; g__Enterorhabdus; s__mouse gut metagenome	1388		OTU_704	k__Bacteria; p__Bacteroidetes; c__Bacteroidia; o__Bacteroidales; f__Bacteroidaceae; g__Bacteroides	2
OTU_386	k__Bacteria; p__Bacteroidetes; c__Bacteroidia; o__Bacteroidales	1111		OTU_1300	k__Bacteria; p__Firmicutes; c__Clostridia; o__Clostridiales	2
OTU_491	k__Bacteria; p__Bacteroidetes; c__Bacteroidia; o__Bacteroidales; f__Muribaculaceae; g__uncultured bacterium; s__uncultured bacterium	224		OTU_1039	k__Bacteria; p__Firmicutes; c__Clostridia; o__Clostridiales; f__Lachnospiraceae	3
OTU_770	k__Bacteria; p__Bacteroidetes; c__Bacteroidia; o__Bacteroidales; f__Muribaculaceae	271		OTU_904	k__Bacteria; p__Firmicutes; c__Clostridia; o__Clostridiales; f__Lachnospiraceae; g__[Eubacterium] oxidoreducens group; s__uncultured bacterium	3
OTU_38	k__Bacteria; p__Bacteroidetes; c__Bacteroidia; o__Bacteroidales; f__Muribaculaceae; g__uncultured bacterium; s__uncultured bacterium	11374		OTU_895	k__Bacteria; p__Bacteroidetes; c__Bacteroidia; o__Bacteroidales; f__Muribaculaceae	2
OTU_597	k__Bacteria; p__Actinobacteria; c__Coriobacteriia; o__Coriobacteriales; f__Atopobiaceae	147		OTU_1207	k__Bacteria; p__Firmicutes; c__Clostridia; o__Clostridiales; f__Lachnospiraceae	2
OTU_759	k__Bacteria; p__Bacteroidetes; c__Bacteroidia; o__Bacteroidales; f__Muribaculaceae; g__uncultured bacterium; s__uncultured bacterium	63		OTU_587	k__Bacteria; p__Firmicutes; c__Clostridia; o__Clostridiales; f__Ruminococcaceae; g__Ruminococcaceae UCG-014	3
OTU_111	k__Bacteria; p__Firmicutes; c__Clostridia; o__Clostridiales; f__Ruminococcaceae	432		OTU_1200	k__Bacteria; p__Actinobacteria; c__Coriobacteriia; o__Coriobacteriales; f__Eggerthellaceae	2
OTU_129	k__Bacteria; p__Firmicutes; c__Clostridia; o__Clostridiales; f__Ruminococcaceae; g__Ruminiclostridium; s__uncultured bacterium	321		OTU_1219	k__Bacteria; p__Firmicutes; c__Clostridia; o__Clostridiales; f__Ruminococcaceae	2
OTU_395	k__Bacteria; p__Bacteroidetes; c__Bacteroidia; o__Bacteroidales; f__Muribaculaceae; g__uncultured bacterium; s__uncultured bacterium	557		OTU_643	k__Bacteria; p__Firmicutes; c__Clostridia; o__Clostridiales; f__Lachnospiraceae	5
OTU_128	k__Bacteria; p__Bacteroidetes; c__Bacteroidia; o__Bacteroidales; f__Bacteroidaceae; g__Bacteroides	416		OTU_682	k__Bacteria; p__Bacteroidetes; c__Bacteroidia; o__Bacteroidales; f__Tannerellaceae; g__Parabacteroides	2
OTU_294	k__Bacteria; p__Firmicutes; c__Bacilli; o__Bacillales; f__Bacillaceae; g__Bacillus; s__Bacillus velezensis	71		OTU_896	k__Bacteria; p__Firmicutes; c__Clostridia; o__Clostridiales; f__Ruminococcaceae	2
OTU_447	k__Bacteria; p__Bacteroidetes; c__Bacteroidia; o__Bacteroidales; f__Muribaculaceae; g__uncultured bacterium; s__uncultured bacterium	202		OTU_862	k__Bacteria; p__Firmicutes; c__Negativicutes; o__Selenomonadales; f__Veillonellaceae	3
OTU_296	k__Bacteria; p__Bacteroidetes; c__Bacteroidia; o__Bacteroidales; f__Muribaculaceae; g__uncultured bacterium; s__uncultured bacterium	102		OTU_863	k__Bacteria; p__Bacteroidetes; c__Bacteroidia; o__Bacteroidales; f__Muribaculaceae	2
OTU_1276	k__Bacteria; p__Firmicutes; c__Erysipelotrichia; o__Erysipelotrichales; f__Erysipelotrichaceae; g__Dubosiella; s__uncultured Erysipelotrichales bacterium	20		OTU_677	k__Bacteria	2
OTU_1290	k__Bacteria; p__Bacteroidetes; c__Bacteroidia; o__Bacteroidales	203		OTU_1204	k__Bacteria; p__Chloroflexi; c__Chloroflexia; o__Thermomicrobiales; f__AKYG1722; g__uncultured Chloroflexi bacterium; s__uncultured Chloroflexi bacterium	3
OTU_501	k__Bacteria; p__Bacteroidetes; c__Bacteroidia; o__Bacteroidales; f__Muribaculaceae; g__uncultured bacterium; s__uncultured bacterium	161		OTU_1169	k__Bacteria; p__Firmicutes	2
OTU_253	k__Bacteria; p__Proteobacteria; c__Deltaproteobacteria; o__Desulfovibrionales; f__Desulfovibrionaceae; g__uncultured; s__uncultured bacterium	33		OTU_1190	k__Bacteria; p__Bacteroidetes; c__Bacteroidia; o__Bacteroidales; f__Bacteroidaceae; g__Bacteroides	2
OTU_1048	k__Bacteria; p__Firmicutes; c__Erysipelotrichia; o__Erysipelotrichales; f__Erysipelotrichaceae; g__Dubosiella; s__uncultured Erysipelotrichales bacterium	20		OTU_1037	k__Bacteria	2
OTU_175	k__Bacteria; p__Firmicutes; c__Clostridia; o__Clostridiales; f__Lachnospiraceae	302		OTU_688	k__Bacteria; p__Chloroflexi; c__Anaerolineae; o__Anaerolineales; f__Anaerolineaceae; g__Anaerolinea; s__uncultured soil bacterium	2
OTU_56	k__Bacteria; p__Firmicutes; c__Clostridia; o__Clostridiales; f__Ruminococcaceae; g__Ruminococcaceae UCG-004; s__uncultured bacterium	3483		OTU_902	k__Bacteria; p__Firmicutes; c__Clostridia; o__Clostridiales; f__Lachnospiraceae	2
OTU_241	k__Bacteria; p__Firmicutes; c__Erysipelotrichia; o__Erysipelotrichales; f__Erysipelotrichaceae; g__Erysipelotrichaceae UCG-003; s__uncultured bacterium	39		OTU_901	k__Bacteria; p__Firmicutes; c__Erysipelotrichia; o__Erysipelotrichales; f__Erysipelotrichaceae; g__Dubosiella; s__uncultured Erysipelotrichales bacterium	2
OTU_444	k__Bacteria; p__Bacteroidetes; c__Bacteroidia; o__Bacteroidales; f__Muribaculaceae; g__uncultured bacterium; s__uncultured bacterium	127		OTU_1220	k__Bacteria; p__Proteobacteria; c__Gammaproteobacteria; o__Betaproteobacteriales; f__Neisseriaceae; g__Neisseria	4
OTU_44	k__Bacteria; p__Proteobacteria; c__Deltaproteobacteria; o__Desulfovibrionales; f__Desulfovibrionaceae; g__Bilophila; s__uncultured bacterium	3114		OTU_820	k__Bacteria; p__Firmicutes; c__Clostridia; o__Clostridiales	3
OTU_151	k__Bacteria; p__Actinobacteria; c__Coriobacteriia; o__Coriobacteriales; f__Eggerthellaceae; g__Gordonibacter; s__uncultured bacterium	223		OTU_585	k__Bacteria; p__Firmicutes; c__Clostridia; o__Clostridiales; f__Lachnospiraceae; g__Lachnospiraceae NK4A136 group	3
OTU_822	k__Bacteria; p__Bacteroidetes; c__Bacteroidia; o__Bacteroidales; f__Muribaculaceae; g__uncultured bacterium; s__uncultured bacterium	87		OTU_903	k__Bacteria; p__Cyanobacteria; c__Oxyphotobacteria; o__Nostocales; f__Oscillatoriaceae; g__Oscillatoria PCC-6304; s__uncultured cyanobacterium	4
OTU_325	k__Bacteria; p__Firmicutes; c__Clostridia; o__Clostridiales; f__Ruminococcaceae; g__Intestinimonas; s__uncultured bacterium	2918		OTU_891	k__Bacteria; p__Firmicutes; c__Clostridia; o__Clostridiales; f__Peptococcaceae; g__Peptococcus; s__unidentified	2
OTU_82	k__Bacteria; p__Firmicutes; c__Clostridia; o__Clostridiales; f__Ruminococcaceae; g__Anaerotruncus; s__uncultured bacterium	1065		OTU_431	k__Bacteria; p__Firmicutes	4
OTU_1282	k__Bacteria; p__Bacteroidetes; c__Bacteroidia; o__Bacteroidales	211		OTU_687	k__Bacteria	3
OTU_466	k__Bacteria; p__Bacteroidetes; c__Bacteroidia; o__Bacteroidales; f__Muribaculaceae; g__uncultured bacterium; s__uncultured bacterium	418		OTU_1156	k__Bacteria; p__Bacteroidetes; c__Bacteroidia; o__Bacteroidales; f__Bacteroidaceae; g__Bacteroides	2
OTU_34	k__Bacteria; p__Firmicutes; c__Clostridia; o__Clostridiales; f__Lachnospiraceae	5892		OTU_1005	k__Bacteria; p__Chloroflexi; c__Anaerolineae; o__Caldilineales; f__Caldilineaceae; g__uncultured; s__uncultured soil bacterium	2
OTU_62	k__Bacteria; p__Bacteroidetes; c__Bacteroidia; o__Bacteroidales; f__Muribaculaceae; g__uncultured bacterium; s__uncultured bacterium	2836		OTU_1047	k__Bacteria; p__Firmicutes; c__Clostridia; o__Clostridiales; f__Ruminococcaceae	2
OTU_398	k__Bacteria; p__Bacteroidetes; c__Bacteroidia; o__Bacteroidales; f__Muribaculaceae; g__uncultured Bacteroidales bacterium; s__uncultured Bacteroidales bacterium	518		OTU_605	k__Bacteria; p__Firmicutes	2
OTU_79	k__Bacteria; p__Firmicutes; c__Clostridia; o__Clostridiales; f__Lachnospiraceae; g__Tyzzerella; s__uncultured bacterium	838		OTU_618	k__Bacteria; p__Acidobacteria; c__Subgroup 6; o__uncultured Acidobacteriales bacterium; f__uncultured Acidobacteriales bacterium; g__uncultured Acidobacteriales bacterium; s__uncultured Acidobacteriales bacterium	2
OTU_154	k__Bacteria; p__Bacteroidetes; c__Bacteroidia; o__Bacteroidales; f__Muribaculaceae; g__uncultured bacterium; s__uncultured bacterium	5557
OTU_94	k__Bacteria; p__Actinobacteria; c__Coriobacteriia; o__Coriobacteriales; f__Eggerthellaceae; g__Parvibacter; s__uncultured bacterium	631
OTU_1171	k__Bacteria; p__Bacteroidetes; c__Bacteroidia; o__Bacteroidales; f__Muribaculaceae	444
OTU_194	k__Bacteria; p__Firmicutes; c__Clostridia; o__Clostridiales; f__Lachnospiraceae; g__Hungatella	75
OTU_145	k__Bacteria; p__Firmicutes; c__Bacilli; o__Bacillales; f__Thermoactinomycetaceae; g__Kroppenstedtia; s__uncultured Kroppenstedtia sp.	460
OTU_921	k__Bacteria; p__Bacteroidetes; c__Bacteroidia; o__Bacteroidales; f__Muribaculaceae	634
OTU_551	k__Bacteria	59
OTU_709	k__Bacteria; p__Bacteroidetes; c__Bacteroidia; o__Bacteroidales; f__Muribaculaceae	114
OTU_74	k__Bacteria; p__Bacteroidetes; c__Bacteroidia; o__Bacteroidales; f__Rikenellaceae; g__Alistipes; s__uncultured bacterium	1149
OTU_1049	k__Bacteria; p__Bacteroidetes; c__Bacteroidia; o__Bacteroidales; f__Muribaculaceae; g__uncultured bacterium; s__uncultured bacterium	56
OTU_1103	k__Bacteria; p__Bacteroidetes; c__Bacteroidia; o__Bacteroidales; f__Muribaculaceae; g__uncultured bacterium; s__uncultured bacterium	2768
OTU_50	k__Bacteria; p__Firmicutes; c__Clostridia; o__Clostridiales; f__Clostridiales vadinBB60 group; g__uncultured bacterium; s__uncultured bacterium	3951
OTU_303	k__Bacteria; p__Bacteroidetes; c__Bacteroidia; o__Bacteroidales; f__Muribaculaceae; g__uncultured bacterium; s__uncultured bacterium	368
OTU_1159	k__Bacteria; p__Bacteroidetes; c__Bacteroidia; o__Bacteroidales; f__Muribaculaceae; g__uncultured bacterium; s__uncultured bacterium	86
OTU_1108	k__Bacteria; p__Bacteroidetes; c__Bacteroidia; o__Bacteroidales	192
OTU_1016	k__Bacteria; p__Bacteroidetes; c__Bacteroidia; o__Bacteroidales; f__Muribaculaceae; g__uncultured bacterium; s__uncultured bacterium	118
OTU_513	k__Bacteria; p__Bacteroidetes; c__Bacteroidia; o__Bacteroidales	167
OTU_1114	k__Bacteria; p__Firmicutes; c__Erysipelotrichia; o__Erysipelotrichales; f__Erysipelotrichaceae; g__Dubosiella; s__uncultured Erysipelotrichales bacterium	65
OTU_165	k__Bacteria; p__Firmicutes; c__Clostridia; o__Clostridiales; f__Lachnospiraceae	269
OTU_233	k__Bacteria; p__Firmicutes; c__Clostridia; o__Clostridiales; f__Eubacteriaceae; g__Anaerofustis; s__unidentified	28
OTU_179	k__Bacteria; p__Firmicutes; c__Clostridia; o__Clostridiales; f__Lachnospiraceae; g__uncultured; s__uncultured bacterium	806
OTU_925	k__Bacteria; p__Bacteroidetes; c__Bacteroidia; o__Bacteroidales; f__Muribaculaceae; g__uncultured bacterium; s__uncultured bacterium	105
OTU_169	k__Bacteria; p__Cyanobacteria; c__Melainabacteria; o__Gastranaerophilales; f__uncultured bacterium; g__uncultured bacterium; s__uncultured bacterium	84
OTU_1013	k__Bacteria; p__Bacteroidetes; c__Bacteroidia; o__Bacteroidales; f__Muribaculaceae; g__uncultured bacterium; s__uncultured bacterium	171
OTU_641	k__Bacteria; p__Bacteroidetes; c__Bacteroidia; o__Bacteroidales; f__Muribaculaceae; g__uncultured bacterium; s__uncultured bacterium	585
OTU_446	k__Bacteria; p__Bacteroidetes; c__Bacteroidia; o__Bacteroidales; f__Muribaculaceae	53
OTU_1110	k__Bacteria; p__Bacteroidetes; c__Bacteroidia; o__Bacteroidales; f__Muribaculaceae	26
OTU_1080	k__Bacteria; p__Bacteroidetes; c__Bacteroidia; o__Bacteroidales; f__Muribaculaceae; g__uncultured bacterium; s__uncultured bacterium	192
OTU_120	k__Bacteria; p__Firmicutes; c__Clostridia; o__Clostridiales; f__Lachnospiraceae; g__uncultured; s__uncultured bacterium	882
OTU_632	k__Bacteria; p__Firmicutes; c__Erysipelotrichia; o__Erysipelotrichales; f__Erysipelotrichaceae; g__Faecalibaculum; s__uncultured bacterium	536
OTU_57	k__Bacteria; p__Firmicutes; c__Clostridia; o__Clostridiales; f__Ruminococcaceae; g__Ruminiclostridium; s__uncultured bacterium	2490
OTU_257	k__Bacteria; p__Actinobacteria; c__Actinobacteria; o__Micrococcales; f__Micrococcaceae; g__Pseudarthrobacter; s__Nesterenkonia sp.	46
OTU_910	k__Bacteria; p__Bacteroidetes; c__Bacteroidia; o__Bacteroidales; f__Muribaculaceae; g__uncultured bacterium; s__uncultured bacterium	97
OTU_1270	k__Bacteria; p__Bacteroidetes; c__Bacteroidia; o__Bacteroidales	140
OTU_934	k__Bacteria; p__Bacteroidetes; c__Bacteroidia; o__Bacteroidales; f__Muribaculaceae	124
OTU_454	k__Bacteria; p__Bacteroidetes; c__Bacteroidia; o__Bacteroidales; f__Muribaculaceae; g__uncultured bacterium; s__uncultured bacterium	25
OTU_377	k__Bacteria; p__Bacteroidetes; c__Bacteroidia; o__Bacteroidales; f__Muribaculaceae; g__uncultured bacterium; s__uncultured bacterium	389
OTU_162	k__Bacteria; p__Firmicutes; c__Clostridia; o__Clostridiales; f__Lachnospiraceae; g__Lachnospiraceae NK4A136 group; s__Clostridiales bacterium CIEAF 020	167
OTU_424	k__Bacteria; p__Bacteroidetes; c__Bacteroidia; o__Bacteroidales	42
OTU_256	k__Bacteria; p__Firmicutes; c__Bacilli; o__Bacillales; f__Thermoactinomycetaceae; g__Kroppenstedtia	117
OTU_1258	k__Bacteria; p__Bacteroidetes; c__Bacteroidia; o__Bacteroidales; f__Muribaculaceae; g__uncultured bacterium; s__uncultured bacterium	68
OTU_358	k__Bacteria; p__Bacteroidetes; c__Bacteroidia; o__Bacteroidales; f__Muribaculaceae; g__uncultured bacterium; s__uncultured bacterium	285
OTU_874	k__Bacteria; p__Bacteroidetes; c__Bacteroidia; o__Bacteroidales; f__Muribaculaceae	190
OTU_425	k__Bacteria; p__Bacteroidetes; c__Bacteroidia; o__Bacteroidales; f__Muribaculaceae; g__uncultured bacterium; s__uncultured bacterium	863
OTU_532	k__Bacteria; p__Bacteroidetes; c__Bacteroidia; o__Bacteroidales; f__Muribaculaceae; g__uncultured bacterium; s__uncultured bacterium	196
OTU_47	k__Bacteria; p__Bacteroidetes; c__Bacteroidia; o__Bacteroidales; f__Prevotellaceae; g__Prevotellaceae UCG-001; s__uncultured Bacteroidales bacterium	3013
OTU_546	k__Bacteria; p__Firmicutes; c__Erysipelotrichia; o__Erysipelotrichales; f__Erysipelotrichaceae; g__Faecalibaculum; s__Faecalibaculum rodentium	308
OTU_148	k__Bacteria; p__Firmicutes; c__Clostridia; o__Clostridiales; f__Family XIII; g__[Eubacterium] nodatum group; s__uncultured bacterium	259
OTU_813	k__Bacteria; p__Bacteroidetes; c__Bacteroidia; o__Bacteroidales; f__Muribaculaceae; g__uncultured bacterium; s__uncultured bacterium	75
OTU_130	k__Bacteria; p__Bacteroidetes; c__Bacteroidia; o__Bacteroidales; f__Muribaculaceae	571
OTU_520	k__Bacteria; p__Bacteroidetes; c__Bacteroidia; o__Bacteroidales; f__Muribaculaceae; g__uncultured bacterium; s__uncultured bacterium	29
OTU_1264	k__Bacteria; p__Bacteroidetes; c__Bacteroidia; o__Bacteroidales; f__Muribaculaceae; g__uncultured bacterium; s__uncultured bacterium	144
OTU_232	k__Bacteria; p__Proteobacteria; c__Alphaproteobacteria; o__Rhizobiales; f__Xanthobacteraceae; g__Bradyrhizobium	84
OTU_336	k__Bacteria; p__Bacteroidetes; c__Bacteroidia; o__Bacteroidales	349
OTU_363	k__Bacteria; p__Bacteroidetes; c__Bacteroidia; o__Bacteroidales	150
OTU_264	k__Bacteria; p__Bacteroidetes; c__Bacteroidia; o__Bacteroidales; f__Muribaculaceae; g__uncultured bacterium; s__uncultured bacterium	26
OTU_21	k__Bacteria; p__Bacteroidetes; c__Bacteroidia; o__Bacteroidales; f__Bacteroidaceae; g__Bacteroides	12267
OTU_23	k__Bacteria; p__Bacteroidetes; c__Bacteroidia; o__Bacteroidales; f__Muribaculaceae; g__uncultured Bacteroidales bacterium; s__uncultured Bacteroidales bacterium	14477
OTU_581	k__Bacteria; p__Firmicutes; c__Erysipelotrichia; o__Erysipelotrichales; f__Erysipelotrichaceae; g__Dubosiella; s__uncultured Erysipelotrichales bacterium	64
OTU_76	k__Bacteria; p__Bacteroidetes; c__Bacteroidia; o__Bacteroidales; f__Muribaculaceae; g__uncultured bacterium; s__uncultured bacterium	1624
OTU_976	k__Bacteria; p__Bacteroidetes; c__Bacteroidia; o__Bacteroidales; f__Muribaculaceae; g__uncultured bacterium; s__uncultured bacterium	31
OTU_1259	k__Bacteria; p__Bacteroidetes; c__Bacteroidia; o__Bacteroidales; f__Muribaculaceae	314
OTU_1001	k__Bacteria; p__Bacteroidetes; c__Bacteroidia; o__Bacteroidales; f__Muribaculaceae; g__uncultured bacterium; s__uncultured bacterium	41
OTU_193	k__Bacteria; p__Firmicutes; c__Clostridia; o__Clostridiales; f__Ruminococcaceae; g__Faecalibacterium; s__uncultured bacterium	154
OTU_680	k__Bacteria; p__Firmicutes; c__Erysipelotrichia; o__Erysipelotrichales; f__Erysipelotrichaceae; g__Faecalibaculum; s__Faecalibaculum rodentium	106
OTU_559	k__Bacteria; p__Bacteroidetes; c__Bacteroidia; o__Bacteroidales; f__Muribaculaceae; g__uncultured bacterium; s__uncultured bacterium	34
OTU_1168	k__Bacteria; p__Bacteroidetes; c__Bacteroidia; o__Bacteroidales; f__Muribaculaceae; g__uncultured bacterium; s__uncultured bacterium	29
OTU_93	k__Bacteria; p__Bacteroidetes; c__Bacteroidia; o__Bacteroidales; f__Muribaculaceae; g__uncultured bacterium; s__uncultured bacterium	1985
OTU_36	k__Bacteria; p__Firmicutes; c__Clostridia; o__Clostridiales; f__Lachnospiraceae; g__[Eubacterium] fissicatena group; s__uncultured bacterium	5923
OTU_150	k__Bacteria; p__Firmicutes; c__Clostridia; o__Clostridiales; f__Lachnospiraceae	181
OTU_1050	k__Bacteria; p__Bacteroidetes; c__Bacteroidia; o__Bacteroidales; f__Muribaculaceae; g__uncultured bacterium; s__uncultured bacterium	147
OTU_623	k__Bacteria; p__Bacteroidetes; c__Bacteroidia; o__Bacteroidales; f__Muribaculaceae; g__uncultured bacterium; s__uncultured bacterium	79
OTU_515	k__Bacteria; p__Bacteroidetes; c__Bacteroidia; o__Bacteroidales; f__Muribaculaceae; g__uncultured bacterium; s__uncultured bacterium	67
OTU_75	k__Bacteria; p__Bacteroidetes; c__Bacteroidia; o__Bacteroidales; f__Muribaculaceae; g__uncultured bacterium; s__uncultured bacterium	3855
OTU_30	k__Bacteria; p__Bacteroidetes; c__Bacteroidia; o__Bacteroidales; f__Rikenellaceae; g__Alistipes; s__gut metagenome	5627
OTU_373	k__Bacteria; p__Firmicutes; c__Erysipelotrichia; o__Erysipelotrichales; f__Erysipelotrichaceae; g__Ileibacterium; s__Erysipelotrichaceae bacterium NYU-BL-F16	247
OTU_67	k__Bacteria; p__Firmicutes; c__Clostridia; o__Clostridiales; f__Ruminococcaceae	6407
OTU_40	k__Bacteria; p__Bacteroidetes; c__Bacteroidia; o__Bacteroidales; f__Muribaculaceae; g__uncultured bacterium; s__uncultured bacterium	5558
OTU_280	k__Bacteria; p__Firmicutes; c__Bacilli; o__Lactobacillales; f__Enterococcaceae; g__Enterococcus; s__Enterococcus faecium	50
OTU_234	k__Bacteria; p__Firmicutes; c__Bacilli; o__Bacillales; f__Staphylococcaceae; g__Staphylococcus	83
OTU_222	k__Bacteria; p__Bacteroidetes; c__Bacteroidia; o__Bacteroidales; f__Bacteroidaceae; g__Bacteroides	1921
OTU_975	k__Bacteria; p__Bacteroidetes; c__Bacteroidia; o__Bacteroidales; f__Rikenellaceae; g__Rikenellaceae RC9 gut group; s__uncultured bacterium	141
OTU_1236	k__Bacteria; p__Bacteroidetes; c__Bacteroidia; o__Bacteroidales; f__Muribaculaceae	44
OTU_1232	k__Bacteria; p__Bacteroidetes; c__Bacteroidia; o__Bacteroidales; f__Muribaculaceae; g__uncultured bacterium; s__uncultured bacterium	159
OTU_146	k__Bacteria; p__Actinobacteria; c__Actinobacteria; o__Bifidobacteriales; f__Bifidobacteriaceae; g__Bifidobacterium; s__Bifidobacterium longum subsp. longum	203
OTU_527	k__Bacteria; p__Bacteroidetes; c__Bacteroidia; o__Bacteroidales; f__Muribaculaceae	93
OTU_626	k__Bacteria; p__Bacteroidetes; c__Bacteroidia; o__Bacteroidales; f__Muribaculaceae; g__uncultured bacterium; s__uncultured bacterium	10
OTU_43	k__Bacteria; p__Firmicutes; c__Clostridia; o__Clostridiales; f__Lachnospiraceae; g__Eisenbergiella; s__uncultured bacterium	4879
OTU_713	k__Bacteria; p__Bacteroidetes; c__Bacteroidia; o__Bacteroidales; f__Muribaculaceae; g__uncultured bacterium; s__uncultured bacterium	502
OTU_87	k__Bacteria; p__Firmicutes; c__Clostridia; o__Clostridiales; f__Ruminococcaceae; g__Ruminococcaceae UCG-010; s__uncultured organism	766
OTU_158	k__Bacteria; p__Firmicutes; c__Erysipelotrichia; o__Erysipelotrichales; f__Erysipelotrichaceae; g__Candidatus Stoquefichus; s__uncultured bacterium	141
OTU_80	k__Bacteria; p__Firmicutes; c__Clostridia; o__Clostridiales; f__Ruminococcaceae; g__Ruminiclostridium 9; s__uncultured bacterium	2109
OTU_88	k__Bacteria; p__Firmicutes; c__Clostridia; o__Clostridiales; f__Peptococcaceae; g__uncultured; s__uncultured bacterium	1273
OTU_37	k__Bacteria; p__Firmicutes; c__Clostridia; o__Clostridiales; f__Ruminococcaceae; g__Oscillibacter; s__unidentified	5017
OTU_163	k__Bacteria; p__Firmicutes; c__Clostridia; o__Clostridiales; f__Lachnospiraceae; g__Blautia; s__uncultured organism	159
OTU_831	k__Bacteria; p__Bacteroidetes; c__Bacteroidia; o__Bacteroidales; f__Muribaculaceae; g__uncultured bacterium; s__uncultured bacterium	41
OTU_142	k__Bacteria; p__Firmicutes; c__Clostridia; o__Clostridiales; f__Ruminococcaceae	440
OTU_133	k__Bacteria; p__Firmicutes; c__Clostridia; o__Clostridiales; f__Ruminococcaceae; g__uncultured; s__uncultured bacterium	280
OTU_71	k__Bacteria; p__Actinobacteria; c__Coriobacteriia; o__Coriobacteriales; f__Eggerthellaceae; g__Enterorhabdus; s__uncultured bacterium	1299
OTU_39	k__Bacteria; p__Firmicutes; c__Clostridia; o__Clostridiales; f__Ruminococcaceae	4932
OTU_137	k__Bacteria; p__Firmicutes; c__Clostridia; o__Clostridiales; f__Lachnospiraceae; g__Lachnospiraceae NK4A136 group	323
OTU_485	k__Bacteria; p__Firmicutes; c__Clostridia; o__Clostridiales; f__Lachnospiraceae; g__Blautia	52
OTU_83	k__Bacteria; p__Firmicutes; c__Clostridia; o__Clostridiales; f__Ruminococcaceae	2200
OTU_156	k__Bacteria; p__Actinobacteria; c__Actinobacteria; o__Bifidobacteriales; f__Bifidobacteriaceae; g__Bifidobacterium; s__unidentified	202
OTU_500	k__Bacteria; p__Firmicutes; c__Clostridia; o__Clostridiales; f__Lachnospiraceae; g__Fusicatenibacter	22
OTU_351	k__Bacteria; p__Firmicutes; c__Clostridia; o__Clostridiales; f__Ruminococcaceae	186
OTU_20	k__Bacteria; p__Firmicutes; c__Clostridia; o__Clostridiales; f__Ruminococcaceae; g__Ruminococcaceae UCG-014; s__uncultured bacterium	9077
OTU_298	k__Bacteria; p__Firmicutes; c__Bacilli; o__Lactobacillales; f__Lactobacillaceae; g__Lactobacillus	35
OTU_1210	k__Bacteria; p__Firmicutes; c__Clostridia; o__Clostridiales; f__Lachnospiraceae	118
OTU_1002	k__Bacteria; p__Firmicutes; c__Erysipelotrichia; o__Erysipelotrichales; f__Erysipelotrichaceae; g__Ileibacterium; s__Erysipelotrichaceae bacterium NYU-BL-F16	20
OTU_815	k__Bacteria	22
OTU_45	k__Bacteria; p__Firmicutes; c__Clostridia; o__Clostridiales; f__Ruminococcaceae; g__Ruminiclostridium; s__uncultured bacterium	3747
OTU_167	k__Bacteria; p__Firmicutes; c__Clostridia; o__Clostridiales; f__Lachnospiraceae; g__Roseburia; s__uncultured organism	475
OTU_5	k__Bacteria; p__Bacteroidetes; c__Bacteroidia; o__Bacteroidales; f__Tannerellaceae; g__Parabacteroides; s__uncultured bacterium	44099
OTU_110	k__Bacteria; p__Firmicutes; c__Clostridia; o__Clostridiales; f__Ruminococcaceae; g__Negativibacillus; s__uncultured bacterium	450
OTU_1162	k__Bacteria; p__Bacteroidetes; c__Bacteroidia; o__Bacteroidales	875
OTU_153	k__Bacteria; p__Firmicutes; c__Bacilli; o__Lactobacillales; f__Lactobacillaceae; g__Lactobacillus; s__Lactobacillus reuteri	311
OTU_1059	k__Bacteria; p__Bacteroidetes; c__Bacteroidia; o__Bacteroidales	523
OTU_1125	k__Bacteria; p__Bacteroidetes; c__Bacteroidia; o__Bacteroidales	695
OTU_1170	k__Bacteria; p__Bacteroidetes; c__Bacteroidia; o__Bacteroidales; f__Muribaculaceae	8
OTU_870	k__Bacteria; p__Firmicutes; c__Erysipelotrichia; o__Erysipelotrichales; f__Erysipelotrichaceae; g__Ileibacterium; s__Erysipelotrichaceae bacterium NYU-BL-F16	160
OTU_602	k__Bacteria; p__Bacteroidetes; c__Bacteroidia; o__Bacteroidales	122
OTU_817	k__Bacteria; p__Bacteroidetes; c__Bacteroidia; o__Bacteroidales; f__Muribaculaceae	49
OTU_607	k__Bacteria; p__Bacteroidetes; c__Bacteroidia; o__Bacteroidales; f__Muribaculaceae	126
OTU_1126	k__Bacteria; p__Bacteroidetes; c__Bacteroidia; o__Bacteroidales	52
OTU_399	k__Bacteria; p__Bacteroidetes; c__Bacteroidia; o__Bacteroidales; f__Tannerellaceae; g__Parabacteroides	77
OTU_188	k__Bacteria; p__Cyanobacteria; c__Melainabacteria; o__Gastranaerophilales; f__uncultured bacterium; g__uncultured bacterium; s__uncultured bacterium	73
OTU_299	k__Bacteria; p__Firmicutes; c__Clostridia; o__Clostridiales; f__Lachnospiraceae; g__[Eubacterium] hallii group; s__uncultured bacterium	45
OTU_272	k__Bacteria; p__Bacteroidetes; c__Bacteroidia; o__Bacteroidales; f__Tannerellaceae; g__Parabacteroides	139
OTU_199	k__Bacteria; p__Proteobacteria; c__Deltaproteobacteria; o__Desulfovibrionales; f__Desulfovibrionaceae; g__Desulfovibrio	63
OTU_1243	k__Bacteria; p__Bacteroidetes; c__Bacteroidia; o__Bacteroidales; f__Muribaculaceae; g__uncultured bacterium; s__uncultured bacterium	23
OTU_569	k__Bacteria	46
OTU_685	k__Bacteria; p__Bacteroidetes; c__Bacteroidia; o__Bacteroidales; f__Bacteroidaceae; g__Bacteroides	413
OTU_655	k__Bacteria; p__Bacteroidetes; c__Bacteroidia; o__Bacteroidales; f__Muribaculaceae	145
OTU_898	k__Bacteria; p__Bacteroidetes; c__Bacteroidia; o__Bacteroidales; f__Muribaculaceae; g__uncultured bacterium; s__uncultured bacterium	47
OTU_715	k__Bacteria; p__Bacteroidetes; c__Bacteroidia; o__Bacteroidales; f__Muribaculaceae; g__uncultured bacterium; s__uncultured bacterium	33
OTU_1303	k__Bacteria; p__Bacteroidetes; c__Bacteroidia; o__Bacteroidales; f__Muribaculaceae; g__uncultured bacterium; s__uncultured bacterium	63
OTU_227	k__Bacteria; p__Firmicutes; c__Bacilli; o__Lactobacillales; f__Leuconostocaceae; g__Weissella; s__Weissella confusa	48
OTU_540	k__Bacteria; p__Bacteroidetes; c__Bacteroidia; o__Bacteroidales; f__Muribaculaceae; g__uncultured bacterium; s__uncultured bacterium	78
OTU_183	k__Bacteria; p__Firmicutes; c__Clostridia; o__Clostridiales; f__Lachnospiraceae; g__Lachnospiraceae NK4A136 group	2033
OTU_147	k__Bacteria; p__Firmicutes; c__Clostridia; o__Clostridiales; f__Peptococcaceae; g__uncultured; s__uncultured bacterium	157
OTU_589	k__Bacteria; p__Firmicutes; c__Clostridia; o__Clostridiales; f__Lachnospiraceae; g__Blautia	125
OTU_134	k__Bacteria; p__Firmicutes; c__Clostridia; o__Clostridiales; f__Lachnospiraceae	469
OTU_741	k__Bacteria; p__Firmicutes; c__Clostridia; o__Clostridiales; f__Lachnospiraceae; g__Lachnoclostridium; s__uncultured bacterium	88
OTU_1299	k__Bacteria; p__Bacteroidetes; c__Bacteroidia; o__Bacteroidales; f__Muribaculaceae; g__uncultured bacterium; s__uncultured bacterium	301
OTU_1075	k__Bacteria; p__Bacteroidetes; c__Bacteroidia; o__Bacteroidales; f__Muribaculaceae	18
OTU_1074	k__Bacteria; p__Bacteroidetes; c__Bacteroidia; o__Bacteroidales	52
OTU_653	k__Bacteria; p__Bacteroidetes; c__Bacteroidia; o__Bacteroidales; f__Muribaculaceae; g__uncultured bacterium; s__uncultured bacterium	125
OTU_669	k__Bacteria; p__Bacteroidetes; c__Bacteroidia; o__Bacteroidales; f__Bacteroidaceae; g__Bacteroides	58
OTU_1302	k__Bacteria; p__Bacteroidetes; c__Bacteroidia; o__Bacteroidales; f__Muribaculaceae; g__uncultured bacterium; s__uncultured bacterium	27
OTU_742	k__Bacteria; p__Bacteroidetes; c__Bacteroidia; o__Bacteroidales; f__Rikenellaceae; g__Rikenellaceae RC9 gut group; s__uncultured bacterium	21
OTU_1135	k__Bacteria; p__Bacteroidetes; c__Bacteroidia; o__Bacteroidales; f__Muribaculaceae; g__uncultured bacterium; s__uncultured bacterium	91
OTU_1174	k__Bacteria; p__Bacteroidetes; c__Bacteroidia; o__Bacteroidales; f__Muribaculaceae; g__uncultured bacterium; s__uncultured bacterium	14
OTU_90	k__Bacteria; p__Firmicutes; c__Clostridia; o__Clostridiales; f__Lachnospiraceae; g__Acetatifactor; s__uncultured bacterium	1402
OTU_89	k__Bacteria; p__Firmicutes; c__Clostridia; o__Clostridiales; f__Ruminococcaceae; g__Ruminococcaceae NK4A214 group; s__uncultured bacterium	776
OTU_127	k__Bacteria; p__Firmicutes; c__Clostridia; o__Clostridiales; f__Ruminococcaceae; g__Ruminiclostridium 5	468
OTU_473	k__Bacteria; p__Bacteroidetes; c__Bacteroidia; o__Bacteroidales; f__Muribaculaceae; g__uncultured bacterium; s__uncultured bacterium	43
OTU_394	k__Bacteria; p__Bacteroidetes; c__Bacteroidia; o__Bacteroidales; f__Muribaculaceae; g__uncultured bacterium; s__uncultured bacterium	26
OTU_1036	k__Bacteria; p__Firmicutes; c__Clostridia; o__Clostridiales; f__Ruminococcaceae	32
OTU_59	k__Bacteria; p__Firmicutes; c__Clostridia; o__Clostridiales; f__Peptostreptococcaceae; g__Paeniclostridium; s__Paeniclostridium sordellii	1869
OTU_302	k__Bacteria; p__Firmicutes; c__Clostridia; o__Clostridiales; f__Lachnospiraceae	52
OTU_1129	k__Bacteria; p__Bacteroidetes; c__Bacteroidia; o__Bacteroidales; f__Muribaculaceae; g__uncultured bacterium; s__uncultured bacterium	18
OTU_658	k__Bacteria; p__Firmicutes; c__Clostridia; o__Clostridiales; f__Ruminococcaceae	26
OTU_328	k__Bacteria; p__Firmicutes; c__Clostridia; o__Clostridiales; f__Ruminococcaceae; g__Ruminiclostridium; s__uncultured bacterium	755

## Sheet: Figure 8B&C
	Shannon	Ace
NC_1	4.74949	512.143
NC_2	5.94772	647.111
NC_3	5.40386	503.721
NC_4	5.89644	607.699
NC_5	5.67162	575.373
DSS_1	4.61201	438.047
DSS_2	2.31727	430.583
DSS_3	3.92385	405.13
DSS_4	3.47069	421.769
DSS_5	4.13056	337.36
DSS_SASP_1	5.30553	475.097
DSS_SASP_2	4.10309	379.467
DSS_SASP_3	5.65119	474.707
DSS_SASP_4	5.18702	458.556
DSS_SASP_5	3.14523	299.246
DSS_TP_L_1	4.96771	434.728
DSS_TP_L_2	4.96213	401.884
DSS_TP_L_3	5.20884	463.777
DSS_TP_L_4	5.31834	492.475
DSS_TP_L_5	5.13576	464.732
DSS_TP_H_1	5.24086	455.86
DSS_TP_H_2	4.38691	374.342
DSS_TP_H_3	5.08097	429.376
DSS_TP_H_4	3.47464	381.786
DSS_TP_H_5	4.65076	440.921
DSS_TP_M_1	5.42003	431.89
DSS_TP_M_2	4.42891	470.765
DSS_TP_M_3	5.23268	527.846
DSS_TP_M_4	5.11083	492.466
DSS_TP_M_5	5.52313	501.434

## Sheet: Figure 8D
OTU ID	DSS_1	DSS_2	DSS_3	DSS_4	DSS_5	NC_1	NC_2	NC_3	NC_4	NC_5	SASP_1	SASP_2	SASP_3	SASP_4	SASP_5	TP_H_1	TP_H_2	TP_H_3	TP_H_4	TP_H_5	TP_L_1	TP_L_2	TP_L_3	TP_L_4	TP_L_5	TP_M_1	TP_M_2	TP_M_3	TP_M_4	TP_M_5	taxonomy
OTU_1279	22	0	0	0	31	0	4	0	0	2	6	0	0	8	0	5	2	0	2	1	1	1	2	20	7	2	0	0	5	5	k__Bacteria; p__Bacteroidetes; c__Bacteroidia; o__Bacteroidales; f__Muribaculaceae; g__uncultured bacterium; s__uncultured bacterium
OTU_1	4491	36604	17932	31447	7297	8	7	65	8	3	3928	12517	3167	608	4234	784	303	975	17818	10228	55	351	353	455	224	365	1368	999	2972	73	k__Bacteria; p__Verrucomicrobia; c__Verrucomicrobiae; o__Verrucomicrobiales; f__Akkermansiaceae; g__Akkermansia; s__uncultured bacterium
OTU_3	6186	518	397	1242	3206	12976	2117	9617	2811	5198	110	50	21	232	11	2322	881	3463	23184	10418	6946	1714	8307	221	564	205	3335	3567	6813	1675	k__Bacteria; p__Firmicutes; c__Erysipelotrichia; o__Erysipelotrichales; f__Erysipelotrichaceae; g__Faecalibaculum; s__uncultured bacterium
OTU_13	84	308	757	297	796	8982	6847	17	1881	583	398	191	457	4145	9	157	160	467	637	1658	1740	1070	1658	318	161	1895	18	104	47	328	k__Bacteria; p__Bacteroidetes; c__Bacteroidia; o__Bacteroidales; f__Muribaculaceae; g__uncultured bacterium; s__uncultured bacterium
OTU_4	7388	8	64	14	15	187	285	2836	240	1195	230	77	271	162	8749	423	2	748	2501	944	5459	4168	1838	6329	4870	162	6833	7256	6592	8059	k__Bacteria; p__Bacteroidetes; c__Bacteroidia; o__Bacteroidales; f__Bacteroidaceae; g__Bacteroides; s__Bacteroides acidifaciens
OTU_22	1697	169	188	1256	7170	59	24	1	0	3	225	173	204	828	6	33	186	369	77	35	833	1210	1401	10	13	77	331	84	195	26	k__Bacteria; p__Actinobacteria; c__Coriobacteriia; o__Coriobacteriales; f__Atopobiaceae; g__Coriobacteriaceae UCG-002; s__uncultured bacterium
OTU_7	3182	132	311	2112	8580	1411	355	6324	1801	715	1201	1084	1535	125	123	709	769	1656	1039	873	1521	1931	2262	394	600	328	3329	1067	2562	284	k__Bacteria; p__Actinobacteria; c__Coriobacteriia; o__Coriobacteriales; f__Atopobiaceae; g__Coriobacteriaceae UCG-002; s__uncultured bacterium
OTU_10	4340	20	2	0	1	52	381	673	67	271	3180	2518	2339	8397	1	4501	1259	2062	1851	2725	566	1617	1167	4833	2862	245	486	300	3919	792	k__Bacteria; p__Bacteroidetes; c__Bacteroidia; o__Bacteroidales; f__Muribaculaceae; g__uncultured bacterium; s__uncultured bacterium
OTU_12	7419	396	1036	779	14891	194	360	0	69	26	234	21	43	325	2153	633	73	833	704	1027	29	92	109	1690	2496	2756	136	96	81	3261	k__Bacteria; p__Bacteroidetes; c__Bacteroidia; o__Bacteroidales; f__Muribaculaceae; g__uncultured bacterium; s__uncultured bacterium
OTU_15	1703	334	263	76	304	4003	218	108	279	657	920	273	153	21	308	4206	576	2065	634	342	1956	118	628	208	372	14	1563	1438	444	1047	k__Bacteria; p__Firmicutes; c__Clostridia; o__Clostridiales; f__Peptostreptococcaceae; g__Romboutsia; s__uncultured bacterium
OTU_16	832	22	393	165	94	317	415	1042	287	513	182	631	1922	233	36	836	161	1683	1201	1106	690	798	570	2496	764	772	1039	958	524	754	k__Bacteria; p__Bacteroidetes; c__Bacteroidia; o__Bacteroidales; f__Muribaculaceae; g__uncultured bacterium; s__uncultured bacterium
OTU_46	476	265	164	152	275	169	129	535	71	96	7	0	3	569	3	526	118	63	116	277	319	137	250	3737	730	959	411	266	666	63	k__Bacteria; p__Bacteroidetes; c__Bacteroidia; o__Bacteroidales; f__Muribaculaceae; g__uncultured bacterium; s__uncultured bacterium
OTU_19	1292	59	714	244	2421	213	253	676	267	537	180	381	895	1203	411	120	82	234	213	1069	1541	408	645	374	169	289	647	348	694	378	k__Bacteria; p__Bacteroidetes; c__Bacteroidia; o__Bacteroidales; f__Muribaculaceae; g__Muribaculum; s__uncultured bacterium
OTU_8	675	0	7835	54	504	2	108	325	4	424	1	1	0	7107	1	3077	2172	1995	1	2	635	4985	4405	0	0	0	0	4	4	3021	k__Bacteria; p__Bacteroidetes; c__Bacteroidia; o__Bacteroidales; f__Prevotellaceae; g__Alloprevotella
OTU_161	6	24	2	26	38	18	18	21	10	4	37	21	4	8	7	0	0	3	1	0	16	3	1	1	0	0	0	0	0	1	k__Bacteria; p__Firmicutes; c__Bacilli; o__Bacillales; f__Bacillaceae; g__Virgibacillus; s__uncultured bacterium
OTU_763	160	0	0	1	1	0	12	43	1	15	4	1	4	7	6	6	0	22	49	18	61	32	28	224	76	4	72	28	91	112	k__Bacteria; p__Bacteroidetes; c__Bacteroidia; o__Bacteroidales
OTU_51	26	5	15	19	6	316	386	623	711	247	60	71	1473	79	0	18	28	9	38	59	74	26	47	86	236	237	59	251	40	168	k__Bacteria; p__Firmicutes; c__Clostridia; o__Clostridiales; f__Lachnospiraceae
OTU_11	861	36	379	2881	503	423	513	1544	999	2129	1533	232	114	6385	18615	4692	69	88	974	7638	1144	4057	1360	1885	3309	1715	15486	1741	1032	970	k__Bacteria; p__Bacteroidetes; c__Bacteroidia; o__Bacteroidales; f__Bacteroidaceae; g__Bacteroides
OTU_18	251	193	552	142	77	28	10	44	97	71	304	1279	1815	405	2148	433	218	22	156	253	547	297	251	113	24	19	423	814	698	42	k__Bacteria; p__Bacteroidetes; c__Bacteroidia; o__Bacteroidales; f__Tannerellaceae; g__Parabacteroides; s__Parabacteroides goldsteinii CL02T12C30
OTU_636	3	0	6	0	7	0	1	0	0	3	0	2	3	5	0	5	0	0	1	0	0	0	0	1	0	0	3	1	4	0	k__Bacteria; p__Bacteroidetes; c__Bacteroidia; o__Bacteroidales; f__Muribaculaceae
OTU_732	125	0	0	0	0	0	14	14	2	5	62	56	75	87	0	97	12	46	26	57	11	27	30	149	62	2	12	5	85	20	k__Bacteria; p__Bacteroidetes; c__Bacteroidia; o__Bacteroidales; f__Muribaculaceae; g__uncultured bacterium; s__uncultured bacterium
OTU_26	385	793	949	1513	474	18	28	44	61	20	345	638	1460	619	52	1704	8245	959	668	605	1347	782	1055	273	47	1731	432	590	987	1070	k__Bacteria; p__Bacteroidetes; c__Bacteroidia; o__Bacteroidales; f__Muribaculaceae; g__uncultured bacterium; s__uncultured bacterium
OTU_434	1	2	0	3	0	1	0	0	0	0	0	0	0	0	0	0	0	0	0	0	0	0	0	0	0	0	0	0	0	0	k__Bacteria; p__Bacteroidetes; c__Bacteroidia; o__Sphingobacteriales; f__Sphingobacteriaceae; g__Mucilaginibacter; s__uncultured bacterium
OTU_78	491	130	27	173	26	9	28	15	8	15	20	19	10	0	0	1003	494	6	29	72	23	88	52	469	31	11	2	301	666	179	k__Bacteria; p__Bacteroidetes; c__Bacteroidia; o__Bacteroidales; f__Muribaculaceae; g__uncultured bacterium; s__uncultured bacterium
OTU_17	922	2185	1694	2819	748	206	620	994	1000	788	83	344	756	25	363	2903	9740	2721	155	484	508	2582	2466	803	319	5487	1422	4239	1125	2208	k__Bacteria; p__Bacteroidetes; c__Bacteroidia; o__Bacteroidales; f__Muribaculaceae; g__uncultured bacterium; s__uncultured bacterium
OTU_1277	50	2	0	1	4	0	0	0	0	0	0	0	0	0	0	4	0	0	0	0	0	0	0	1	2	0	0	1	0	2	k__Bacteria; p__Bacteroidetes; c__Bacteroidia; o__Bacteroidales; f__Muribaculaceae; g__uncultured bacterium; s__uncultured bacterium
OTU_25	659	66	672	180	58	150	142	125	78	73	85	550	412	320	1	712	151	783	183	36	152	242	295	234	245	383	109	39	282	348	k__Bacteria; p__Bacteroidetes; c__Bacteroidia; o__Bacteroidales; f__Rikenellaceae; g__Alistipes; s__uncultured bacterium
OTU_666	20	5	4	2	31	0	1	0	0	0	2	0	0	2	2	4	1	4	0	8	0	0	0	9	8	3	0	0	0	8	k__Bacteria; p__Bacteroidetes; c__Bacteroidia; o__Bacteroidales; f__Muribaculaceae; g__uncultured bacterium; s__uncultured bacterium
OTU_14	376	829	345	879	480	57	472	524	227	667	495	753	215	1059	410	1180	2293	683	246	371	506	1880	904	1716	589	526	474	502	1258	1168	k__Bacteria; p__Bacteroidetes; c__Bacteroidia; o__Bacteroidales; f__Muribaculaceae; g__uncultured bacterium; s__uncultured bacterium
OTU_49	494	70	116	208	288	491	170	2692	313	341	828	339	232	109	0	219	506	851	1707	1095	939	374	1323	67	287	495	515	640	464	518	k__Bacteria; p__Firmicutes; c__Erysipelotrichia; o__Erysipelotrichales; f__Erysipelotrichaceae; g__Dubosiella; s__uncultured bacterium
OTU_24	125	1098	245	906	107	578	328	737	438	520	354	752	53	291	62	562	541	334	287	874	284	233	188	234	146	1631	67	257	298	840	k__Bacteria; p__Bacteroidetes; c__Bacteroidia; o__Bacteroidales; f__Rikenellaceae; g__Alistipes
OTU_97	237	2	28	67	89	0	0	0	0	0	2	3	8	0	0	9	24	4	39	130	0	0	0	1	0	13	0	1	0	2	k__Bacteria; p__Firmicutes; c__Clostridia; o__Clostridiales; f__Lachnospiraceae; g__Blautia; s__uncultured bacterium
OTU_9	61	2	172	17	2	766	535	1212	4195	3203	3409	1126	2145	67	1	149	19	48	25	423	1268	66	271	2856	7147	9725	400	15532	18	2393	k__Bacteria; p__Firmicutes; c__Clostridia; o__Clostridiales; f__Lachnospiraceae; g__Blautia; s__Lachnospiraceae bacterium 28-4
OTU_65	241	3	57	33	205	23	47	69	41	71	142	163	476	137	12	36	30	65	48	50	473	237	263	215	167	318	116	56	41	407	k__Bacteria; p__Bacteroidetes; c__Bacteroidia; o__Bacteroidales; f__Muribaculaceae
OTU_70	88	250	47	30	64	19	50	76	51	64	62	346	211	276	11	344	83	114	45	52	0	0	0	154	75	150	102	33	154	114	k__Bacteria; p__Bacteroidetes; c__Bacteroidia; o__Bacteroidales; f__Muribaculaceae; g__uncultured bacterium; s__uncultured bacterium
OTU_777	45	1	0	0	0	0	4	3	0	1	5	7	7	4	0	59	19	20	1	17	0	10	3	32	14	1	2	0	31	2	k__Bacteria; p__Bacteroidetes; c__Bacteroidia; o__Bacteroidales; f__Muribaculaceae; g__uncultured bacterium; s__uncultured bacterium
OTU_928	18	0	1	1	0	0	0	0	0	1	1	0	0	0	3	4	0	1	6	2	7	6	6	3	3	0	7	2	11	12	k__Bacteria; p__Bacteroidetes; c__Bacteroidia; o__Bacteroidales
OTU_28	91	9	1	2	0	18	389	1482	3300	399	50	72	126	37	1	45	7	38	60	64	842	115	39	37	14	934	3	151	848	64	k__Bacteria; p__Firmicutes; c__Clostridia; o__Clostridiales; f__Lachnospiraceae; g__Lachnospiraceae NK4A136 group
OTU_200	205	30	72	34	760	74	205	2	9	1	6	0	2	50	4	11	1	45	34	105	1	7	15	143	80	302	0	0	1	70	k__Bacteria; p__Bacteroidetes; c__Bacteroidia; o__Bacteroidales; f__Muribaculaceae; g__uncultured bacterium; s__uncultured bacterium
OTU_364	10	13	63	130	3	0	4	17	22	27	132	119	90	4	1	23	28	8	2	15	46	37	6	61	33	52	3	10	52	19	k__Bacteria; p__Bacteroidetes; c__Bacteroidia; o__Bacteroidales; f__Muribaculaceae
OTU_1061	126	0	0	0	0	0	1	0	0	0	3	0	0	6	0	6	0	4	1	7	0	0	0	10	16	2	0	0	1	1	k__Bacteria; p__Bacteroidetes; c__Bacteroidia; o__Bacteroidales; f__Muribaculaceae; g__uncultured bacterium; s__uncultured bacterium
OTU_1339	45	0	10	5	14	0	3	8	2	11	0	4	10	1	3	2	0	6	5	17	9	4	9	17	2	9	10	0	9	2	k__Bacteria; p__Bacteroidetes; c__Bacteroidia; o__Bacteroidales; f__Muribaculaceae
OTU_33	235	24	530	26	1771	65	75	18	16	2	7	3	9	15	823	161	211	14	81	124	546	26	156	101	66	60	147	88	95	122	k__Bacteria; p__Proteobacteria; c__Gammaproteobacteria; o__Enterobacteriales; f__Enterobacteriaceae; g__Escherichia-Shigella; s__Escherichia coli
OTU_458	5	0	0	0	1	0	0	1	1	0	2	0	2	0	0	3	2	11	0	0	0	1	1	1	4	2	0	0	1	1	k__Bacteria; p__Bacteroidetes; c__Bacteroidia; o__Bacteroidales; f__Muribaculaceae; g__uncultured bacterium; s__uncultured bacterium
OTU_2	634	6241	7931	8145	2992	2500	710	1897	2148	2829	6567	17155	8803	417	1986	1796	10129	3979	1851	2012	7558	6237	1101	2117	2557	3923	818	3357	3358	4270	k__Bacteria; p__Bacteroidetes; c__Bacteroidia; o__Bacteroidales; f__Rikenellaceae; g__Rikenellaceae RC9 gut group; s__uncultured bacterium
OTU_31	30	7	3	14	4	6	0	0	9	87	25	9	27	46	3	29	42	10	16	18	261	7	137	190	3112	360	49	245	18	472	k__Bacteria; p__Deferribacteres; c__Deferribacteres; o__Deferribacterales; f__Deferribacteraceae; g__Mucispirillum
OTU_60	49	23	52	48	29	568	140	238	165	184	57	35	34	41	2	34	37	102	63	71	201	58	140	3	23	26	104	220	113	47	k__Bacteria; p__Actinobacteria; c__Actinobacteria; o__Bifidobacteriales; f__Bifidobacteriaceae; g__Bifidobacterium; s__uncultured bacterium
OTU_119	6	3	2	29	22	5	4	22	8	4	2	8	31	38	1	5	28	0	1	5	2	0	12	4	14	60	3	12	0	11	k__Bacteria; p__Firmicutes; c__Clostridia; o__Clostridiales; f__Ruminococcaceae; g__Anaerotruncus
OTU_943	29	0	0	0	0	0	1	1	0	0	3	3	2	0	0	26	24	19	5	12	1	8	7	11	6	4	2	4	11	8	k__Bacteria; p__Bacteroidetes; c__Bacteroidia; o__Bacteroidales; f__Muribaculaceae; g__uncultured bacterium; s__uncultured bacterium
OTU_452	1	1	0	0	0	0	0	0	1	1	0	0	0	0	0	3	1	0	1	0	0	1	1	1	2	1	0	0	3	0	k__Bacteria; p__Bacteroidetes; c__Bacteroidia; o__Bacteroidales; f__Muribaculaceae; g__uncultured bacterium; s__uncultured bacterium
OTU_102	7	2	3	2	0	98	1	26	25	15	11	17	5	83	4	14	3	10	11	11	25	17	14	4	5	24	6	62	6	19	k__Bacteria; p__Firmicutes; c__Bacilli; o__Lactobacillales; f__Streptococcaceae; g__Streptococcus
OTU_1228	20	0	1	10	164	1	0	0	0	0	0	0	0	0	0	0	2	4	0	0	3	6	6	0	0	0	1	0	2	0	k__Bacteria; p__Actinobacteria; c__Coriobacteriia; o__Coriobacteriales; f__Atopobiaceae; g__Coriobacteriaceae UCG-002; s__uncultured bacterium
OTU_410	40	7	69	35	107	2	8	26	5	20	0	6	15	1	10	10	36	23	1	24	24	28	49	13	5	54	28	18	25	31	k__Bacteria; p__Bacteroidetes; c__Bacteroidia; o__Bacteroidales; f__Muribaculaceae; g__uncultured bacterium; s__uncultured bacterium
OTU_204	15	7	0	0	0	0	10	3	22	32	0	0	0	0	0	0	0	0	0	0	0	0	0	0	0	0	0	0	0	0	k__Bacteria; p__Firmicutes; c__Negativicutes; o__Selenomonadales; f__Veillonellaceae; g__Veillonella; s__uncultured bacterium
OTU_181	3	21	0	0	0	0	4	13	0	25	0	0	0	0	0	0	0	0	0	0	0	0	0	0	0	0	0	0	0	0	k__Bacteria; p__Firmicutes; c__Clostridia; o__Clostridiales; f__Family XI; g__Ezakiella
OTU_185	13	0	2	4	10	0	0	0	0	0	1	0	1	0	3	14	5	6	11	5	0	0	0	4	0	12	2	0	0	0	k__Bacteria; p__Firmicutes; c__Clostridia; o__Clostridiales; f__Lachnospiraceae
OTU_989	79	21	20	20	177	0	12	0	2	0	0	0	1	0	6	5	3	21	1	6	0	1	3	14	14	85	0	0	0	29	k__Bacteria; p__Bacteroidetes; c__Bacteroidia; o__Bacteroidales; f__Muribaculaceae; g__uncultured bacterium; s__uncultured bacterium
OTU_437	18	67	15	24	27	7	17	8	3	7	0	0	0	0	0	32	27	3	0	3	2	10	10	39	5	117	14	12	9	4	k__Bacteria; p__Bacteroidetes; c__Bacteroidia; o__Bacteroidales; f__Muribaculaceae; g__uncultured bacterium; s__uncultured bacterium
OTU_341	39	38	69	134	67	2	6	4	3	0	24	35	71	30	2	105	178	25	36	43	72	29	53	43	2	146	15	9	52	54	k__Bacteria; p__Bacteroidetes; c__Bacteroidia; o__Bacteroidales; f__Muribaculaceae; g__uncultured bacterium; s__uncultured bacterium
OTU_397	7	1	0	0	0	2	19	0	0	2	15	2	6	108	0	8	3	2	8	36	3	2	12	18	13	2	0	0	2	0	k__Bacteria; p__Bacteroidetes; c__Bacteroidia; o__Bacteroidales; f__Muribaculaceae; g__uncultured bacterium; s__uncultured bacterium
OTU_850	38	59	42	37	49	4	23	7	19	2	1	2	6	6	8	24	49	26	0	9	12	17	22	17	5	106	6	7	10	39	k__Bacteria; p__Bacteroidetes; c__Bacteroidia; o__Bacteroidales; f__Muribaculaceae; g__uncultured bacterium; s__uncultured bacterium
OTU_654	57	0	0	0	0	0	1	0	0	0	0	0	0	2	0	0	0	2	1	4	0	0	1	4	7	0	0	0	0	2	k__Bacteria; p__Bacteroidetes; c__Bacteroidia; o__Bacteroidales; f__Muribaculaceae; g__uncultured bacterium; s__uncultured bacterium
OTU_55	109	39	60	155	28	103	162	440	181	268	193	192	923	552	37	312	115	142	85	79	296	271	349	249	52	187	289	211	370	226	k__Bacteria; p__Bacteroidetes; c__Bacteroidia; o__Bacteroidales; f__Muribaculaceae; g__uncultured bacterium; s__uncultured bacterium
OTU_694	18	41	25	43	24	0	0	1	3	1	1	9	18	1	1	33	317	20	9	7	14	32	29	4	0	66	7	7	20	19	k__Bacteria; p__Bacteroidetes; c__Bacteroidia; o__Bacteroidales; f__Muribaculaceae; g__uncultured bacterium; s__uncultured bacterium
OTU_63	172	33	231	362	53	22	330	554	166	215	319	271	452	283	10	581	207	116	98	147	274	205	189	551	151	418	178	312	459	319	k__Bacteria; p__Bacteroidetes; c__Bacteroidia; o__Bacteroidales; f__Muribaculaceae
OTU_505	160	45	64	48	312	0	7	1	0	0	2	0	0	0	38	26	9	36	9	13	0	6	3	37	36	170	10	3	4	120	k__Bacteria; p__Bacteroidetes; c__Bacteroidia; o__Bacteroidales; f__Muribaculaceae; g__uncultured bacterium; s__uncultured bacterium
OTU_628	30	7	75	43	61	2	1	0	3	3	19	16	72	21	5	47	92	68	46	53	57	29	42	22	1	55	36	10	45	53	k__Bacteria; p__Bacteroidetes; c__Bacteroidia; o__Bacteroidales; f__Muribaculaceae; g__uncultured bacterium; s__uncultured bacterium
OTU_1014	154	3	20	8	575	3	0	0	0	0	0	0	1	2	26	1	0	5	4	21	1	1	1	10	6	12	0	1	0	15	k__Bacteria; p__Bacteroidetes; c__Bacteroidia; o__Bacteroidales; f__Muribaculaceae; g__uncultured bacterium; s__uncultured bacterium
OTU_6	91	166	217	356	196	1350	225	5587	2689	3609	1837	1214	409	82	2	2822	788	5749	2722	1010	6249	1998	5999	34	124	1659	659	923	1562	2405	k__Bacteria; p__Firmicutes; c__Erysipelotrichia; o__Erysipelotrichales; f__Erysipelotrichaceae; g__Ileibacterium; s__Erysipelotrichaceae bacterium NYU-BL-F16
OTU_113	67	0	52	80	18	0	0	0	0	0	1	52	2	0	17	0	65	0	0	5	5	0	0	0	1	8	0	0	0	0	k__Bacteria; p__Firmicutes; c__Erysipelotrichia; o__Erysipelotrichales; f__Erysipelotrichaceae; g__Coprobacillus; s__uncultured bacterium
OTU_343	1	0	0	0	0	0	2	1	1	0	0	0	0	0	0	0	0	0	0	5	0	1	5	9	22	19	12	0	0	0	k__Bacteria; p__Proteobacteria; c__Gammaproteobacteria; o__Enterobacteriales; f__Enterobacteriaceae; g__Pantoea; s__Pantoea agglomerans
OTU_315	6	1	0	0	0	0	6	3	7	16	0	0	0	0	0	0	0	0	0	0	0	0	0	0	0	0	0	0	0	0	k__Bacteria; p__Firmicutes; c__Clostridia; o__Clostridiales; f__Family XI; g__Anaerococcus
OTU_27	241	131	71	31	265	70	30	96	71	58	126	441	373	333	865	213	11	97	77	129	228	211	55	76	49	70	32	30	41	377	k__Bacteria; p__Bacteroidetes; c__Bacteroidia; o__Bacteroidales; f__Tannerellaceae; g__Parabacteroides
OTU_757	3	0	0	0	0	0	0	0	0	0	1	0	0	2	0	3	0	0	0	2	0	0	0	0	2	0	0	0	2	0	k__Bacteria; p__Bacteroidetes; c__Bacteroidia; o__Bacteroidales
OTU_48	97	50	51	58	41	1560	45	386	183	454	19	34	67	6	17	133	19	28	15	15	95	4	6	83	247	141	151	329	100	53	k__Bacteria; p__Firmicutes; c__Clostridia; o__Clostridiales; f__Clostridiaceae 1; g__Clostridium sensu stricto 1; s__uncultured bacterium
OTU_297	11	12	0	0	0	0	9	7	5	8	0	0	0	0	0	0	0	0	0	0	0	0	0	0	0	0	0	0	0	0	k__Bacteria; p__Bacteroidetes; c__Bacteroidia; o__Bacteroidales; f__Prevotellaceae
OTU_166	17	13	19	0	0	0	0	0	0	17	0	0	0	15	15	0	0	0	0	1	14	0	0	0	0	0	0	0	0	0	k__Bacteria; p__Proteobacteria; c__Gammaproteobacteria; o__Aeromonadales; f__Aeromonadaceae; g__Aeromonas; s__Aeromonas hydrophila subsp. hydrophila
OTU_506	41	0	19	87	17	0	24	31	6	26	43	8	1	25	107	75	2	1	10	89	8	18	7	57	47	51	44	12	21	19	k__Bacteria; p__Bacteroidetes; c__Bacteroidia; o__Bacteroidales
OTU_281	8	0	0	11	16	0	1	52	2	2	6	0	0	0	0	1	1	6	7	3	2	2	10	0	0	1	10	2	2	0	k__Bacteria; p__Firmicutes; c__Erysipelotrichia; o__Erysipelotrichales; f__Erysipelotrichaceae; g__Dubosiella
OTU_767	37	3	1	1	0	0	0	0	1	0	35	22	36	20	0	53	88	26	21	15	7	19	13	12	5	2	2	1	27	8	k__Bacteria; p__Bacteroidetes; c__Bacteroidia; o__Bacteroidales; f__Muribaculaceae; g__uncultured bacterium; s__uncultured bacterium
OTU_1095	6	0	11	0	7	0	0	0	0	0	0	0	0	0	0	0	0	0	0	0	0	0	0	0	0	0	0	0	0	3	k__Bacteria; p__Bacteroidetes; c__Bacteroidia; o__Bacteroidales
OTU_32	84	2	1	6	0	419	465	683	30	80	44	149	212	782	0	67	1	3	57	479	166	74	119	348	1254	493	83	347	13	52	k__Bacteria; p__Firmicutes; c__Clostridia; o__Clostridiales; f__Ruminococcaceae; g__Intestinimonas; s__uncultured bacterium
OTU_68	65	29	31	16	3	106	64	94	74	89	15	15	42	73	45	12	3	8	5	28	93	26	10	8	5	13	2	156	9	10	k__Bacteria; p__Proteobacteria; c__Gammaproteobacteria; o__Oceanospirillales; f__Halomonadaceae; g__Halomonas
OTU_545	2	121	72	23	20	277	167	1	37	14	21	23	22	10	1	15	47	47	32	69	79	40	17	4	6	51	1	0	0	39	k__Bacteria; p__Bacteroidetes; c__Bacteroidia; o__Bacteroidales; f__Muribaculaceae; g__uncultured bacterium; s__uncultured bacterium
OTU_1309	20	0	1	3	32	0	1	0	0	0	2	1	0	0	0	0	0	3	10	5	0	0	0	2	2	3	1	0	0	8	k__Bacteria
OTU_481	33	11	25	31	3	5	21	21	13	8	1	15	21	0	0	44	54	67	5	11	8	24	18	11	3	60	5	2	3	42	k__Bacteria; p__Bacteroidetes; c__Bacteroidia; o__Bacteroidales; f__Muribaculaceae
OTU_54	44	1	0	0	0	132	334	146	414	179	312	41	1574	54	1	16	16	4	3	57	64	13	14	90	33	223	43	406	59	194	k__Bacteria; p__Firmicutes; c__Clostridia; o__Clostridiales; f__Lachnospiraceae; g__Lachnoclostridium; s__uncultured bacterium
OTU_109	21	8	21	19	10	76	20	136	42	40	11	23	50	68	10	82	15	51	34	32	139	79	57	8	31	46	49	101	46	10	k__Bacteria; p__Actinobacteria; c__Coriobacteriia; o__Coriobacteriales; f__Eggerthellaceae; g__Enterorhabdus
OTU_959	21	0	7	2	3	2	1	0	0	0	1	0	0	0	0	3	0	3	0	0	0	0	1	0	0	10	0	0	0	2	k__Bacteria; p__Bacteroidetes; c__Bacteroidia; o__Bacteroidales; f__Muribaculaceae; g__uncultured bacterium; s__uncultured bacterium
OTU_592	3	8	6	1	8	3	12	0	4	0	0	0	0	0	1	1	10	4	0	3	2	7	2	11	0	26	2	4	4	0	k__Bacteria; p__Bacteroidetes; c__Bacteroidia; o__Bacteroidales; f__Muribaculaceae; g__uncultured bacterium; s__uncultured bacterium
OTU_95	47	10	40	39	82	10	3	4	5	14	8	7	18	3	79	17	21	2	1	14	2	1	0	12	22	108	2	14	8	27	k__Bacteria; p__Firmicutes; c__Clostridia; o__Clostridiales; f__Ruminococcaceae; g__UBA1819; s__uncultured organism
OTU_662	66	2	222	494	228	0	0	0	1	1	434	318	164	4	0	107	142	468	419	288	289	89	353	1	10	356	59	34	78	53	k__Bacteria; p__Firmicutes; c__Erysipelotrichia; o__Erysipelotrichales; f__Erysipelotrichaceae; g__Faecalibaculum; s__uncultured bacterium
OTU_1137	11	0	0	0	0	0	1	0	0	0	0	0	0	0	0	1	1	0	0	0	0	0	0	5	0	0	0	0	2	0	k__Bacteria; p__Bacteroidetes; c__Bacteroidia; o__Bacteroidales; f__Muribaculaceae; g__uncultured bacterium; s__uncultured bacterium
OTU_429	13	1	12	6	86	1	10	12	1	6	0	1	3	11	2	3	7	6	1	3	12	4	6	59	17	35	25	4	14	4	k__Bacteria; p__Bacteroidetes; c__Bacteroidia; o__Bacteroidales; f__Muribaculaceae
OTU_503	36	8	2	5	19	1	0	0	0	0	0	0	0	3	0	3	0	1	1	2	0	0	0	50	21	31	0	0	2	3	k__Bacteria; p__Bacteroidetes; c__Bacteroidia; o__Bacteroidales; f__Muribaculaceae; g__uncultured bacterium; s__uncultured bacterium
OTU_567	129	4	42	50	84	5	17	1	0	0	25	1	2	7	5	43	2	20	19	20	0	2	2	79	62	131	9	1	0	107	k__Bacteria; p__Bacteroidetes; c__Bacteroidia; o__Bacteroidales; f__Muribaculaceae; g__uncultured bacterium; s__uncultured bacterium
OTU_409	94	2	115	60	354	41	66	218	133	172	61	88	293	62	13	11	41	211	46	21	173	85	85	91	77	163	344	142	149	142	k__Bacteria; p__Bacteroidetes; c__Bacteroidia; o__Bacteroidales; f__Muribaculaceae; g__uncultured Bacteroidales bacterium; s__uncultured Bacteroidales bacterium
OTU_582	5	0	0	1	0	2	3	4	5	1	0	0	0	0	0	0	0	0	0	1	1	0	0	0	0	1	3	2	0	1	k__Bacteria; p__Firmicutes; c__Clostridia; o__Clostridiales; f__Lachnospiraceae
OTU_1078	26	0	0	3	2	0	0	0	0	0	0	0	0	0	0	2	0	1	0	0	0	0	0	9	0	0	0	0	0	1	k__Bacteria; p__Bacteroidetes; c__Bacteroidia; o__Bacteroidales; f__Muribaculaceae; g__uncultured bacterium; s__uncultured bacterium
OTU_307	4	0	0	0	2	0	1	0	0	0	0	0	0	0	2	0	4	0	1	2	0	0	0	0	1	6	0	0	0	0	k__Bacteria; p__Firmicutes; c__Clostridia; o__Clostridiales; f__Lachnospiraceae; g__Anaerostipes
OTU_284	1	7	0	1	0	7	0	0	0	0	0	0	0	0	0	0	0	0	0	0	0	0	0	0	0	0	0	0	0	0	k__Bacteria; p__Proteobacteria; c__Alphaproteobacteria; o__Rhizobiales; f__Methylopilaceae; g__Methylopila; s__Methylopila sp. YHT-1
OTU_35	24	11	53	93	18	2219	1236	1954	1166	728	730	232	1961	1211	16	91	133	5	99	678	589	246	590	681	1878	1063	107	2358	129	1093	k__Bacteria; p__Firmicutes; c__Clostridia; o__Clostridiales; f__Ruminococcaceae
OTU_42	129	0	7	49	0	505	340	171	755	16	857	164	224	12	7	85	33	27	90	349	63	77	88	34	664	469	169	270	49	430	k__Bacteria; p__Firmicutes; c__Clostridia; o__Clostridiales; f__Lachnospiraceae
OTU_672	6	0	0	1	2	0	1	0	0	0	0	0	0	0	0	0	0	0	0	2	0	0	0	3	5	0	0	0	0	0	k__Bacteria; p__Bacteroidetes; c__Bacteroidia; o__Bacteroidales; f__Muribaculaceae; g__uncultured bacterium; s__uncultured bacterium
OTU_393	38	8	0	3	0	0	0	0	0	0	0	0	0	0	0	33	7	0	0	2	0	1	0	88	6	0	0	4	23	1	k__Bacteria; p__Bacteroidetes; c__Bacteroidia; o__Bacteroidales; f__Muribaculaceae; g__uncultured bacterium; s__uncultured bacterium
OTU_187	9	0	0	0	41	0	1	0	0	0	0	0	0	0	20	0	6	0	0	0	1	0	0	0	0	2	0	0	0	1	k__Bacteria; p__Firmicutes; c__Erysipelotrichia; o__Erysipelotrichales; f__Erysipelotrichaceae; g__Erysipelatoclostridium; s__unidentified
OTU_1136	1	0	0	0	0	3	0	0	0	0	0	0	0	0	0	0	0	0	0	0	0	0	0	0	0	0	0	0	0	0	k__Bacteria; p__Proteobacteria; c__Alphaproteobacteria; o__Tistrellales; f__Geminicoccaceae; g__uncultured
OTU_1077	5	0	0	0	2	0	0	0	0	1	0	0	0	0	0	0	0	0	0	0	0	0	0	1	0	0	0	0	0	0	k__Bacteria; p__Bacteroidetes; c__Bacteroidia; o__Bacteroidales; f__Muribaculaceae; g__uncultured bacterium; s__uncultured bacterium
OTU_171	68	1	0	0	17	1	3	1	1	0	0	0	0	0	20	5	16	2	12	21	13	1	5	5	19	9	11	3	1	9	k__Bacteria; p__Proteobacteria; c__Gammaproteobacteria; o__Enterobacteriales; f__Enterobacteriaceae; g__Citrobacter
OTU_353	3	4	0	3	0	1	0	0	1	0	0	0	0	0	0	0	0	0	0	0	0	0	0	0	0	0	0	0	0	0	k__Bacteria; p__Proteobacteria; c__Alphaproteobacteria; o__Sphingomonadales; f__Sphingomonadaceae; g__Sphingomonas; s__metagenome
OTU_197	38	15	0	0	0	0	11	5	7	35	0	0	0	0	0	0	0	0	0	0	0	0	0	0	0	0	0	0	0	0	k__Bacteria; p__Bacteroidetes; c__Bacteroidia; o__Bacteroidales; f__Prevotellaceae; g__Prevotella 7; s__uncultured bacterium
OTU_215	10	13	0	0	0	0	2	7	2	2	0	0	0	0	0	0	0	0	0	0	0	0	0	0	0	0	0	0	0	0	k__Bacteria; p__Bacteroidetes; c__Bacteroidia; o__Bacteroidales; f__Porphyromonadaceae; g__Porphyromonas; s__uncultured Porphyromonas sp.
OTU_1058	40	9	30	27	113	0	3	0	0	0	4	0	3	2	3	19	8	15	9	21	2	1	6	19	13	54	1	6	7	73	k__Bacteria; p__Bacteroidetes; c__Bacteroidia; o__Bacteroidales; f__Muribaculaceae; g__uncultured bacterium; s__uncultured bacterium
OTU_590	130	0	0	0	0	0	1	0	0	0	1	0	0	6	0	6	1	2	5	5	0	0	0	17	21	3	0	0	0	11	k__Bacteria; p__Bacteroidetes; c__Bacteroidia; o__Bacteroidales; f__Muribaculaceae; g__uncultured bacterium; s__uncultured bacterium
OTU_136	13	0	0	0	0	15	106	146	141	61	0	1	4	4	0	3	2	8	11	8	0	3	2	3	1	4	0	9	0	0	k__Bacteria; p__Firmicutes; c__Clostridia; o__Clostridiales; f__Lachnospiraceae; g__Lachnospiraceae NK4A136 group; s__uncultured bacterium
OTU_414	5	2	1	4	5	0	0	0	0	0	3	1	0	0	0	3	16	2	6	2	4	0	7	0	0	4	0	1	4	1	k__Bacteria
OTU_235	4	6	4	0	0	0	0	0	0	4	0	0	0	6	8	0	0	0	0	0	7	0	0	0	0	0	0	0	0	0	k__Bacteria; p__Proteobacteria; c__Gammaproteobacteria; o__Betaproteobacteriales; f__Burkholderiaceae
OTU_442	74	3	2	5	9	0	0	1	0	0	57	58	76	62	1	146	219	52	48	45	20	24	27	26	1	17	7	0	77	38	k__Bacteria; p__Bacteroidetes; c__Bacteroidia; o__Bacteroidales; f__Muribaculaceae; g__uncultured bacterium; s__uncultured bacterium
OTU_584	3	0	4	4	39	6	14	1	6	2	0	0	0	18	0	0	0	1	6	7	0	2	0	1	0	7	0	0	0	1	k__Bacteria; p__Bacteroidetes; c__Bacteroidia; o__Bacteroidales; f__Muribaculaceae; g__uncultured bacterium; s__uncultured bacterium
OTU_52	43	5	149	66	41	638	107	164	73	57	49	40	106	60	0	112	0	0	2	0	51	57	91	2	6	72	17	42	20	11	k__Bacteria; p__Firmicutes; c__Bacilli; o__Lactobacillales; f__Lactobacillaceae; g__Lactobacillus; s__Lactobacillus gasseri
OTU_1000	11	0	3	5	0	1	23	39	8	15	35	29	14	0	1	11	0	2	0	0	7	7	6	9	5	10	13	4	37	16	k__Bacteria; p__Bacteroidetes; c__Bacteroidia; o__Bacteroidales
OTU_1079	3	0	0	0	0	0	0	0	0	0	0	0	0	0	0	0	0	0	0	0	0	0	0	0	0	0	0	0	0	0	k__Bacteria; p__Actinobacteria; c__Acidimicrobiia; o__Microtrichales; f__uncultured; g__uncultured actinobacterium; s__uncultured actinobacterium
OTU_122	3	6	0	0	0	107	30	3	0	17	2	1	3	9	37	6	8	26	12	2	7	4	3	0	2	21	5	31	5	3	k__Bacteria; p__Firmicutes; c__Bacilli; o__Lactobacillales; f__Lactobacillaceae; g__Lactobacillus; s__Lactobacillus murinus
OTU_744	4	0	0	0	0	0	0	0	0	0	0	0	0	0	0	0	0	0	0	0	0	0	0	1	0	0	0	0	2	0	k__Bacteria; p__Bacteroidetes; c__Bacteroidia; o__Bacteroidales; f__Bacteroidaceae; g__Bacteroides; s__Bacteroides acidifaciens
OTU_291	2	0	0	1	0	6	3	2	1	0	1	0	0	1	0	0	0	1	0	1	2	1	2	0	0	0	0	6	0	0	k__Bacteria; p__Proteobacteria; c__Gammaproteobacteria; o__Betaproteobacteriales; f__Burkholderiaceae; g__Ralstonia; s__uncultured bacterium
OTU_112	2	2	5	2	0	46	114	123	228	126	18	3	263	30	1	5	5	9	1	11	44	5	17	119	87	20	14	106	32	195	k__Bacteria; p__Firmicutes; c__Clostridia; o__Clostridiales; f__Lachnospiraceae; g__Lachnospiraceae NK4A136 group
OTU_951	7	0	2	0	0	0	0	0	0	0	0	0	0	0	0	0	0	0	1	1	0	0	0	1	0	0	0	0	0	0	k__Bacteria; p__Bacteroidetes; c__Bacteroidia; o__Bacteroidales
OTU_965	25	0	0	0	0	0	0	0	0	1	1	0	0	0	0	1	0	0	0	0	0	0	0	13	1	0	0	0	0	0	k__Bacteria; p__Bacteroidetes; c__Bacteroidia; o__Bacteroidales; f__Muribaculaceae; g__uncultured bacterium; s__uncultured bacterium
OTU_941	5	0	0	0	1	0	0	0	0	0	0	0	0	0	0	1	0	0	0	0	0	0	0	2	0	0	0	0	0	0	k__Bacteria; p__Bacteroidetes; c__Bacteroidia; o__Bacteroidales; f__Muribaculaceae; g__uncultured bacterium; s__uncultured bacterium
OTU_99	39	3	57	73	33	1	26	16	6	14	23	88	235	126	0	142	108	102	20	26	67	70	132	40	17	47	26	4	42	115	k__Bacteria; p__Bacteroidetes; c__Bacteroidia; o__Bacteroidales; f__Muribaculaceae; g__uncultured bacterium; s__uncultured bacterium
OTU_361	4	0	12	0	0	0	0	0	2	3	0	0	0	0	0	0	0	0	0	1	0	0	1	0	0	1	0	0	0	0	k__Bacteria; p__Firmicutes; c__Bacilli; o__Bacillales; f__Bacillaceae; g__Bacillus; s__Bacillus sp. TAT112
OTU_703	35	67	58	87	52	14	57	30	32	21	4	6	26	0	0	50	140	100	6	19	16	59	58	39	13	156	34	33	17	62	k__Bacteria; p__Bacteroidetes; c__Bacteroidia; o__Bacteroidales; f__Muribaculaceae; g__uncultured bacterium; s__uncultured bacterium
OTU_1070	3	2	2	4	1	0	0	1	1	1	0	0	0	0	0	3	44	11	0	0	0	2	3	0	0	10	3	3	0	0	k__Bacteria; p__Bacteroidetes; c__Bacteroidia; o__Bacteroidales; f__Muribaculaceae; g__uncultured bacterium; s__uncultured bacterium
OTU_262	8	0	0	0	0	3	8	3	5	1	5	0	13	1	0	0	0	1	0	0	0	0	1	0	4	3	0	3	0	0	k__Bacteria; p__Firmicutes; c__Clostridia; o__Clostridiales; f__Lachnospiraceae
OTU_117	22	2	5	25	329	0	0	0	0	0	0	5	5	0	37	5	2	3	5	16	1	0	0	0	1	8	0	0	0	8	k__Bacteria; p__Firmicutes; c__Erysipelotrichia; o__Erysipelotrichales; f__Erysipelotrichaceae; g__[Clostridium] innocuum group; s__uncultured bacterium
OTU_1283	2	0	0	0	0	0	0	0	0	0	0	0	0	0	0	0	0	0	0	0	0	0	0	0	0	0	0	0	0	0	k__Bacteria; p__Bacteroidetes; c__Bacteroidia; o__Bacteroidales; f__Muribaculaceae
OTU_379	13	0	0	0	0	0	0	0	0	0	0	0	0	0	0	0	0	0	0	0	1	2	0	0	1	0	0	1	0	0	k__Bacteria; p__Actinobacteria; c__Coriobacteriia; o__Coriobacteriales
OTU_138	26	1	1	0	0	1	18	0	1	3	6	6	11	74	0	39	5	3	46	41	24	14	17	5	2	9	0	5	15	17	k__Bacteria; p__Bacteroidetes; c__Bacteroidia; o__Bacteroidales; f__Muribaculaceae; g__uncultured bacterium; s__uncultured bacterium
OTU_333	8	4	0	0	0	0	0	0	0	3	0	0	0	0	0	0	0	0	0	0	0	0	0	0	0	0	0	0	0	0	k__Bacteria; p__Firmicutes; c__Bacilli; o__Lactobacillales; f__Carnobacteriaceae; g__Granulicatella; s__uncultured bacterium
OTU_103	15	0	1	0	0	1	0	0	0	0	100	31	13	0	0	32	34	60	171	97	0	0	0	2	19	32	14	11	7	1	k__Bacteria; p__Firmicutes; c__Erysipelotrichia; o__Erysipelotrichales; f__Erysipelotrichaceae; g__Dubosiella; s__uncultured bacterium
OTU_61	39	87	339	612	650	0	9	3	1	1	4	53	112	9	513	15	29	1	2	14	10	18	8	3	22	20	0	0	1	5	k__Bacteria; p__Firmicutes; c__Clostridia; o__Clostridiales; f__Ruminococcaceae; g__Flavonifractor; s__uncultured bacterium
OTU_184	20	18	0	0	0	0	21	10	12	29	0	0	0	0	0	0	0	0	0	0	0	0	0	0	0	0	0	0	0	0	k__Bacteria; p__Bacteroidetes; c__Bacteroidia; o__Bacteroidales; f__Prevotellaceae; g__Prevotella
OTU_900	12	87	26	75	12	0	9	10	8	12	2	10	5	1	7	40	223	26	4	4	4	50	32	14	5	43	9	13	16	46	k__Bacteria; p__Bacteroidetes; c__Bacteroidia; o__Bacteroidales; f__Muribaculaceae; g__uncultured bacterium; s__uncultured bacterium
OTU_382	18	0	0	0	0	0	0	0	0	0	0	0	0	0	0	0	0	0	0	0	0	0	0	0	0	0	0	0	0	0	k__Bacteria; p__Firmicutes; c__Negativicutes; o__Selenomonadales; f__Veillonellaceae; g__Megamonas; s__uncultured bacterium
OTU_29	6	1	8	5	1	412	2990	1165	949	364	251	36	568	2123	0	94	0	7	34	169	150	54	252	360	836	312	53	786	41	619	k__Bacteria; p__Firmicutes; c__Clostridia; o__Clostridiales; f__Ruminococcaceae; g__Intestinimonas; s__uncultured bacterium
OTU_92	20	25	17	18	39	37	13	134	57	41	8	23	29	36	3	114	79	99	53	45	125	62	52	8	21	33	66	70	44	17	k__Bacteria; p__Actinobacteria; c__Coriobacteriia; o__Coriobacteriales; f__Eggerthellaceae; g__Enterorhabdus; s__mouse gut metagenome
OTU_374	63	0	39	11	106	0	0	0	0	0	3	2	2	0	14	1	3	0	10	8	3	0	1	2	2	13	0	10	2	6	k__Bacteria; p__Firmicutes; c__Clostridia; o__Clostridiales; f__Lachnospiraceae; g__Robinsoniella; s__unidentified
OTU_487	2	0	0	0	0	0	0	0	0	1	0	0	0	0	0	0	0	0	0	0	0	0	0	0	0	0	0	0	0	0	k__Bacteria; p__Firmicutes; c__Erysipelotrichia; o__Erysipelotrichales; f__Erysipelotrichaceae
OTU_386	27	0	212	6	35	0	8	4	0	7	0	0	0	11	0	95	332	92	0	0	5	98	108	0	0	0	0	0	0	71	k__Bacteria; p__Bacteroidetes; c__Bacteroidia; o__Bacteroidales
OTU_491	5	1	0	6	0	1	2	11	3	3	3	0	0	1	5	14	1	0	13	33	6	11	5	22	14	8	40	6	3	7	k__Bacteria; p__Bacteroidetes; c__Bacteroidia; o__Bacteroidales; f__Muribaculaceae; g__uncultured bacterium; s__uncultured bacterium
OTU_770	61	0	6	2	163	0	4	0	0	0	0	0	0	2	11	0	0	0	2	4	0	1	0	2	4	5	1	0	0	3	k__Bacteria; p__Bacteroidetes; c__Bacteroidia; o__Bacteroidales; f__Muribaculaceae
OTU_38	49	39	287	153	166	40	130	322	173	284	64	76	350	786	118	304	198	631	23	21	2475	1218	1324	19	16	351	1182	178	248	149	k__Bacteria; p__Bacteroidetes; c__Bacteroidia; o__Bacteroidales; f__Muribaculaceae; g__uncultured bacterium; s__uncultured bacterium
OTU_347	4	5	0	0	0	0	4	0	0	0	0	0	0	0	0	0	0	0	0	0	0	0	0	0	0	0	0	0	0	0	k__Bacteria; p__Firmicutes; c__Clostridia; o__Clostridiales; f__Family XI; g__Peptoniphilus
OTU_597	18	0	1	9	10	9	1	32	9	1	1	2	2	0	0	4	2	7	0	1	5	7	7	0	0	0	12	0	7	0	k__Bacteria; p__Actinobacteria; c__Coriobacteriia; o__Coriobacteriales; f__Atopobiaceae
OTU_135	3	0	16	4	0	13	12	27	9	12	11	1	1	6	0	0	0	0	0	0	4	0	12	14	6	47	9	32	7	25	k__Bacteria; p__Firmicutes; c__Clostridia; o__Clostridiales; f__Ruminococcaceae
OTU_759	7	0	7	3	19	0	1	0	0	0	0	0	0	1	2	0	0	8	0	0	0	0	0	1	0	7	4	0	0	3	k__Bacteria; p__Bacteroidetes; c__Bacteroidia; o__Bacteroidales; f__Muribaculaceae; g__uncultured bacterium; s__uncultured bacterium
OTU_371	1	0	1	0	3	0	1	0	1	2	0	1	0	1	2	0	0	0	0	0	0	1	0	0	0	0	0	0	0	0	k__Bacteria; p__Proteobacteria; c__Alphaproteobacteria; o__Caulobacterales; f__Caulobacteraceae; g__Brevundimonas; s__Brevundimonas diminuta
OTU_111	31	10	19	4	9	2	0	0	0	15	12	44	20	1	4	0	4	0	0	12	0	0	0	15	124	8	63	35	0	0	k__Bacteria; p__Firmicutes; c__Clostridia; o__Clostridiales; f__Ruminococcaceae
OTU_129	7	0	0	0	0	5	59	26	18	17	13	3	39	25	0	0	0	0	1	2	0	5	16	14	35	0	2	13	1	20	k__Bacteria; p__Firmicutes; c__Clostridia; o__Clostridiales; f__Ruminococcaceae; g__Ruminiclostridium; s__uncultured bacterium
OTU_268	1	0	0	0	0	1	2	5	4	0	0	1	1	1	1	0	0	0	0	3	1	0	0	0	0	0	0	0	0	0	k__Bacteria; p__Proteobacteria; c__Alphaproteobacteria; o__Rhizobiales; f__Rhizobiaceae
OTU_395	81	11	7	9	127	0	5	0	0	0	0	0	0	3	1	9	2	1	0	14	1	4	1	126	74	71	4	1	2	3	k__Bacteria; p__Bacteroidetes; c__Bacteroidia; o__Bacteroidales; f__Muribaculaceae; g__uncultured bacterium; s__uncultured bacterium
OTU_128	1	1	0	0	1	0	0	0	12	4	0	0	1	3	0	6	137	3	79	125	11	4	22	3	0	0	1	1	0	1	k__Bacteria; p__Bacteroidetes; c__Bacteroidia; o__Bacteroidales; f__Bacteroidaceae; g__Bacteroides
OTU_294	2	0	14	1	2	0	0	0	0	3	0	1	33	7	1	1	0	0	0	1	1	1	0	0	0	0	1	1	1	0	k__Bacteria; p__Firmicutes; c__Bacilli; o__Bacillales; f__Bacillaceae; g__Bacillus; s__Bacillus velezensis
OTU_447	3	49	1	5	0	1	1	0	0	0	2	0	0	0	0	36	81	0	1	3	0	1	0	2	2	0	0	3	1	10	k__Bacteria; p__Bacteroidetes; c__Bacteroidia; o__Bacteroidales; f__Muribaculaceae; g__uncultured bacterium; s__uncultured bacterium
OTU_435	2	1	0	0	0	0	0	0	7	0	0	0	0	0	0	0	0	0	1	1	0	5	0	0	0	2	0	0	0	0	k__Bacteria; p__Firmicutes; c__Bacilli; o__Bacillales; f__Bacillaceae
OTU_296	11	0	0	0	0	0	4	0	0	0	0	0	0	11	0	4	3	0	1	3	0	0	1	44	6	3	3	0	8	0	k__Bacteria; p__Bacteroidetes; c__Bacteroidia; o__Bacteroidales; f__Muribaculaceae; g__uncultured bacterium; s__uncultured bacterium
OTU_1276	4	0	0	0	0	0	0	4	0	0	2	0	0	0	0	0	0	6	1	1	0	0	0	0	1	0	0	0	1	0	k__Bacteria; p__Firmicutes; c__Erysipelotrichia; o__Erysipelotrichales; f__Erysipelotrichaceae; g__Dubosiella; s__uncultured Erysipelotrichales bacterium
OTU_1064	2	0	0	0	0	0	0	0	0	0	2	0	1	0	0	1	0	0	0	0	0	0	0	2	4	0	0	0	0	2	k__Bacteria; p__Bacteroidetes; c__Bacteroidia; o__Bacteroidales; f__Muribaculaceae; g__uncultured bacterium; s__uncultured bacterium
OTU_502	7	4	0	6	2	0	2	1	0	0	0	0	0	0	0	3	0	0	1	0	0	0	0	2	1	0	0	0	0	0	k__Bacteria; p__Bacteroidetes; c__Bacteroidia; o__Bacteroidales; f__Muribaculaceae; g__uncultured bacterium; s__uncultured bacterium
OTU_1290	2	7	16	7	1	0	0	1	1	0	22	61	38	1	12	0	6	0	1	1	13	7	0	0	0	1	0	1	2	2	k__Bacteria; p__Bacteroidetes; c__Bacteroidia; o__Bacteroidales
OTU_857	2	0	0	0	0	4	1	0	0	0	0	0	0	0	0	0	0	0	0	0	0	0	0	0	0	0	0	0	0	0	k__Bacteria; p__Firmicutes; c__Erysipelotrichia; o__Erysipelotrichales; f__Erysipelotrichaceae; g__Allobaculum; s__uncultured bacterium
OTU_501	28	8	4	12	58	0	1	0	0	0	0	0	0	3	1	1	1	3	0	2	0	0	0	0	2	22	1	0	0	14	k__Bacteria; p__Bacteroidetes; c__Bacteroidia; o__Bacteroidales; f__Muribaculaceae; g__uncultured bacterium; s__uncultured bacterium
OTU_253	1	1	8	0	0	1	0	0	0	2	0	2	0	7	0	0	0	3	1	2	0	0	1	0	1	0	3	0	0	0	k__Bacteria; p__Proteobacteria; c__Deltaproteobacteria; o__Desulfovibrionales; f__Desulfovibrionaceae; g__uncultured; s__uncultured bacterium
OTU_579	2	1	0	0	0	1	1	3	0	0	0	0	0	0	0	5	1	0	2	4	0	0	1	104	7	23	4	1	9	0	k__Bacteria; p__Bacteroidetes; c__Bacteroidia; o__Bacteroidales; f__Muribaculaceae; g__uncultured bacterium; s__uncultured bacterium
OTU_1048	1	0	0	0	0	0	0	1	0	0	6	1	0	0	0	0	0	4	3	1	0	1	1	0	0	0	0	0	1	0	k__Bacteria; p__Firmicutes; c__Erysipelotrichia; o__Erysipelotrichales; f__Erysipelotrichaceae; g__Dubosiella; s__uncultured Erysipelotrichales bacterium
OTU_175	8	0	16	17	15	0	5	2	2	5	10	6	19	5	3	6	9	0	15	28	1	3	1	10	8	68	15	11	3	11	k__Bacteria; p__Firmicutes; c__Clostridia; o__Clostridiales; f__Lachnospiraceae
OTU_411	1	0	0	2	0	0	0	0	2	0	0	1	1	0	0	0	0	0	0	0	0	0	0	0	0	1	0	0	1	2	k__Bacteria; p__Bacteroidetes; c__Bacteroidia; o__Bacteroidales; f__Muribaculaceae; g__uncultured bacterium; s__uncultured bacterium
OTU_56	7	1	0	0	0	390	430	344	416	300	133	12	516	104	0	17	0	2	0	1	16	33	48	43	187	0	49	348	49	37	k__Bacteria; p__Firmicutes; c__Clostridia; o__Clostridiales; f__Ruminococcaceae; g__Ruminococcaceae UCG-004; s__uncultured bacterium
OTU_241	1	0	1	0	0	0	0	0	0	1	0	0	0	1	2	0	0	0	1	5	0	0	0	0	26	0	1	0	0	0	k__Bacteria; p__Firmicutes; c__Erysipelotrichia; o__Erysipelotrichales; f__Erysipelotrichaceae; g__Erysipelotrichaceae UCG-003; s__uncultured bacterium
OTU_444	15	0	3	5	15	1	3	3	1	1	1	0	7	0	1	2	0	5	1	0	5	13	4	2	3	15	7	2	1	11	k__Bacteria; p__Bacteroidetes; c__Bacteroidia; o__Bacteroidales; f__Muribaculaceae; g__uncultured bacterium; s__uncultured bacterium
OTU_44	6	0	3	11	4	38	297	57	239	211	54	61	318	109	13	54	26	7	18	16	164	35	66	93	131	353	63	351	76	240	k__Bacteria; p__Proteobacteria; c__Deltaproteobacteria; o__Desulfovibrionales; f__Desulfovibrionaceae; g__Bilophila; s__uncultured bacterium
OTU_151	23	28	0	0	1	10	2	35	6	18	0	2	1	0	15	23	8	9	14	6	5	3	2	1	0	6	2	2	1	0	k__Bacteria; p__Actinobacteria; c__Coriobacteriia; o__Coriobacteriales; f__Eggerthellaceae; g__Gordonibacter; s__uncultured bacterium
OTU_822	1	3	0	0	0	0	2	1	0	2	0	9	10	3	0	11	2	6	2	1	0	0	0	13	10	0	6	0	3	2	k__Bacteria; p__Bacteroidetes; c__Bacteroidia; o__Bacteroidales; f__Muribaculaceae; g__uncultured bacterium; s__uncultured bacterium
OTU_325	7	2	3	2	0	62	280	551	532	274	75	1	6	199	1	22	9	5	24	56	7	17	36	83	161	118	56	181	28	120	k__Bacteria; p__Firmicutes; c__Clostridia; o__Clostridiales; f__Ruminococcaceae; g__Intestinimonas; s__uncultured bacterium
OTU_82	6	4	16	4	2	3	0	13	59	28	33	24	158	11	1	13	4	3	13	20	2	1	37	32	5	115	28	278	47	105	k__Bacteria; p__Firmicutes; c__Clostridia; o__Clostridiales; f__Ruminococcaceae; g__Anaerotruncus; s__uncultured bacterium
OTU_1282	9	1	0	2	0	1	0	0	0	0	2	0	0	2	142	1	0	0	1	1	7	5	1	0	1	0	13	9	13	0	k__Bacteria; p__Bacteroidetes; c__Bacteroidia; o__Bacteroidales
OTU_466	20	0	0	0	0	1	9	9	3	9	41	12	18	56	0	56	4	14	12	45	2	10	9	25	16	0	4	2	29	12	k__Bacteria; p__Bacteroidetes; c__Bacteroidia; o__Bacteroidales; f__Muribaculaceae; g__uncultured bacterium; s__uncultured bacterium
OTU_34	18	2	57	15	0	310	629	108	225	404	229	38	2078	529	1	31	12	18	5	35	73	15	60	58	231	447	42	99	47	76	k__Bacteria; p__Firmicutes; c__Clostridia; o__Clostridiales; f__Lachnospiraceae
OTU_786	9	1	0	0	47	0	0	0	0	0	1	0	0	0	2	0	0	0	0	2	0	0	0	1	0	1	0	0	0	2	k__Bacteria; p__Bacteroidetes; c__Bacteroidia; o__Bacteroidales; f__Muribaculaceae; g__uncultured bacterium; s__uncultured bacterium
OTU_292	3	3	0	0	0	0	7	0	1	4	0	0	0	0	0	0	0	0	0	0	0	0	0	0	0	0	0	0	0	0	k__Bacteria; p__Firmicutes; c__Clostridia; o__Clostridiales; f__Peptostreptococcaceae; g__Peptostreptococcus
OTU_331	2	5	1	4	0	0	0	0	1	6	3	0	0	0	3	0	0	1	0	0	2	1	4	0	0	0	0	0	0	0	k__Bacteria; p__Firmicutes; c__Bacilli; o__Bacillales; f__Bacillaceae; g__Oceanobacillus; s__Bacilli bacterium VT-13-104
OTU_62	2	16	114	91	136	24	106	77	43	74	0	0	0	313	47	69	131	103	120	105	15	65	77	350	84	0	81	52	164	377	k__Bacteria; p__Bacteroidetes; c__Bacteroidia; o__Bacteroidales; f__Muribaculaceae; g__uncultured bacterium; s__uncultured bacterium
OTU_398	6	0	18	3	60	26	74	8	27	11	5	10	31	18	0	2	2	37	6	5	38	6	24	20	10	35	21	0	5	10	k__Bacteria; p__Bacteroidetes; c__Bacteroidia; o__Bacteroidales; f__Muribaculaceae; g__uncultured Bacteroidales bacterium; s__uncultured Bacteroidales bacterium
OTU_79	6	2	8	11	0	52	80	39	20	61	46	6	174	70	1	6	6	0	0	9	2	14	27	24	110	1	11	31	8	13	k__Bacteria; p__Firmicutes; c__Clostridia; o__Clostridiales; f__Lachnospiraceae; g__Tyzzerella; s__uncultured bacterium
OTU_1065	3	3	1	2	0	0	0	0	0	0	3	0	6	2	0	9	10	2	1	0	2	5	1	1	3	14	1	1	3	0	k__Bacteria; p__Bacteroidetes; c__Bacteroidia; o__Bacteroidales; f__Muribaculaceae; g__uncultured bacterium; s__uncultured bacterium
OTU_276	8	0	3	1	2	6	0	1	1	0	1	0	0	0	2	0	0	0	0	0	1	0	0	0	2	0	0	0	0	0	k__Bacteria; p__Actinobacteria; c__Actinobacteria
OTU_544	4	1	0	2	0	8	0	1	0	0	0	0	0	0	0	0	0	1	0	0	0	0	0	0	0	0	0	0	0	0	k__Bacteria; p__Actinobacteria; c__Actinobacteria; o__Micrococcales
OTU_154	25	108	138	63	148	652	1165	0	265	99	76	44	114	677	0	36	39	129	94	293	266	240	346	77	34	334	7	23	7	58	k__Bacteria; p__Bacteroidetes; c__Bacteroidia; o__Bacteroidales; f__Muribaculaceae; g__uncultured bacterium; s__uncultured bacterium
OTU_1164	2	0	0	0	14	0	0	0	0	0	0	0	0	0	2	0	0	0	0	0	0	0	0	0	1	0	0	0	0	0	k__Bacteria; p__Bacteroidetes; c__Bacteroidia; o__Bacteroidales
OTU_94	13	1	8	9	15	42	31	108	58	53	5	4	6	45	0	26	2	6	4	0	16	17	6	2	3	12	47	43	39	10	k__Bacteria; p__Actinobacteria; c__Coriobacteriia; o__Coriobacteriales; f__Eggerthellaceae; g__Parvibacter; s__uncultured bacterium
OTU_316	5	0	1	4	0	4	5	4	2	1	0	0	1	0	0	0	0	0	0	1	0	0	0	0	0	0	0	1	0	0	k__Bacteria; p__Actinobacteria; c__Actinobacteria; o__Micrococcales; f__Micrococcaceae; g__Pseudarthrobacter
OTU_278	14	11	0	0	0	0	1	1	5	0	0	0	0	0	0	0	0	0	0	0	0	0	0	0	0	0	0	0	0	0	k__Bacteria; p__Actinobacteria; c__Actinobacteria; o__Corynebacteriales; f__Corynebacteriaceae
OTU_1171	7	11	13	42	7	0	9	15	4	14	5	0	15	0	0	43	48	7	1	4	6	20	10	11	4	66	13	25	21	23	k__Bacteria; p__Bacteroidetes; c__Bacteroidia; o__Bacteroidales; f__Muribaculaceae
OTU_972	17	36	11	11	10	2	5	3	4	1	0	0	0	0	0	6	6	0	0	2	2	1	0	44	3	49	8	1	10	3	k__Bacteria; p__Bacteroidetes; c__Bacteroidia; o__Bacteroidales; f__Muribaculaceae; g__uncultured bacterium; s__uncultured bacterium
OTU_194	12	2	13	6	10	0	0	0	2	1	0	2	3	0	0	1	2	3	1	5	0	0	0	3	1	8	0	0	0	0	k__Bacteria; p__Firmicutes; c__Clostridia; o__Clostridiales; f__Lachnospiraceae; g__Hungatella
OTU_1107	1	0	0	0	0	0	0	0	1	0	0	0	0	0	0	0	0	0	0	0	1	0	0	1	1	1	6	0	0	3	k__Bacteria; p__Bacteroidetes; c__Bacteroidia; o__Bacteroidales
OTU_948	2	0	0	0	0	0	0	0	0	0	0	0	0	0	0	0	0	1	0	0	0	0	0	1	0	0	0	0	1	0	k__Bacteria
OTU_145	4	1	8	9	15	18	32	5	3	7	16	0	2	31	32	4	1	21	14	28	13	15	38	32	11	23	32	2	22	21	k__Bacteria; p__Firmicutes; c__Bacilli; o__Bacillales; f__Thermoactinomycetaceae; g__Kroppenstedtia; s__uncultured Kroppenstedtia sp.
OTU_159	5	0	0	5	3	36	7	20	8	4	1	2	9	7	0	0	3	5	0	0	8	13	16	1	1	0	0	0	0	0	k__Bacteria; p__Actinobacteria; c__Coriobacteriia; o__Coriobacteriales; f__Eggerthellaceae; g__Enterorhabdus; s__uncultured bacterium
OTU_1304	1	0	0	0	0	0	0	0	0	2	2	0	0	7	1	0	1	0	0	5	0	0	0	0	0	0	0	0	0	0	k__Bacteria; p__Bacteroidetes; c__Bacteroidia; o__Bacteroidales; f__Muribaculaceae
OTU_921	2	20	28	40	4	3	20	12	13	13	51	44	40	2	0	42	87	18	10	17	20	18	6	19	8	29	4	7	20	37	k__Bacteria; p__Bacteroidetes; c__Bacteroidia; o__Bacteroidales; f__Muribaculaceae
OTU_551	2	0	0	4	29	0	1	0	1	0	0	0	4	0	0	0	0	6	1	5	3	0	0	0	0	0	1	0	1	1	k__Bacteria
OTU_709	10	1	11	3	27	0	4	0	1	2	2	1	2	2	1	0	0	0	0	4	8	2	5	5	2	3	6	0	9	3	k__Bacteria; p__Bacteroidetes; c__Bacteroidia; o__Bacteroidales; f__Muribaculaceae
OTU_74	12	100	33	97	5	24	25	48	45	39	26	78	92	87	1	1	0	0	0	0	36	102	77	26	42	0	22	10	49	72	k__Bacteria; p__Bacteroidetes; c__Bacteroidia; o__Bacteroidales; f__Rikenellaceae; g__Alistipes; s__uncultured bacterium
OTU_1049	12	0	3	2	16	0	1	0	0	0	0	0	0	0	2	1	0	1	0	8	0	2	1	0	0	3	2	0	0	2	k__Bacteria; p__Bacteroidetes; c__Bacteroidia; o__Bacteroidales; f__Muribaculaceae; g__uncultured bacterium; s__uncultured bacterium
OTU_1103	20	132	102	211	18	1	0	2	7	6	0	5	32	0	5	136	1444	74	13	14	19	49	66	8	0	230	21	15	53	85	k__Bacteria; p__Bacteroidetes; c__Bacteroidia; o__Bacteroidales; f__Muribaculaceae; g__uncultured bacterium; s__uncultured bacterium
OTU_1084	1	0	0	0	0	0	0	0	0	2	0	0	0	0	0	0	0	0	0	0	0	0	0	0	0	0	0	0	0	0	k__Bacteria; p__Actinobacteria; c__Actinobacteria; o__Actinomycetales; f__Actinomycetaceae; g__Actinomyces
OTU_964	3	0	1	3	6	0	0	0	0	0	1	0	0	0	0	0	0	1	0	2	1	0	0	0	0	0	0	1	2	0	k__Bacteria; p__Firmicutes; c__Erysipelotrichia; o__Erysipelotrichales; f__Erysipelotrichaceae; g__Faecalibaculum; s__uncultured bacterium
OTU_50	19	6	39	39	1	95	15	143	157	252	443	340	12	96	25	34	19	106	50	189	76	30	78	43	328	215	90	734	45	232	k__Bacteria; p__Firmicutes; c__Clostridia; o__Clostridiales; f__Clostridiales vadinBB60 group; g__uncultured bacterium; s__uncultured bacterium
OTU_303	9	6	8	6	15	1	4	17	3	6	0	0	0	38	0	15	3	1	0	2	52	22	41	16	2	34	45	2	18	2	k__Bacteria; p__Bacteroidetes; c__Bacteroidia; o__Bacteroidales; f__Muribaculaceae; g__uncultured bacterium; s__uncultured bacterium
OTU_1159	3	0	3	2	0	0	8	0	0	2	2	1	3	1	0	2	2	2	2	2	13	7	2	7	1	4	7	1	8	1	k__Bacteria; p__Bacteroidetes; c__Bacteroidia; o__Bacteroidales; f__Muribaculaceae; g__uncultured bacterium; s__uncultured bacterium
OTU_947	2	0	0	0	0	0	0	0	0	0	0	0	0	0	0	0	0	0	0	0	0	0	0	0	0	0	0	0	0	0	k__Bacteria; p__Bacteroidetes; c__Bacteroidia; o__Bacteroidales; f__Muribaculaceae; g__Muribaculum; s__Parabacteroides sp. YL27
OTU_1108	1	4	5	28	0	1	12	14	3	4	15	13	0	1	0	9	7	2	2	5	5	6	2	2	2	23	3	1	3	19	k__Bacteria; p__Bacteroidetes; c__Bacteroidia; o__Bacteroidales
OTU_1016	19	5	3	1	18	0	1	0	0	0	0	0	1	1	0	0	0	0	1	1	0	0	0	28	17	18	0	0	0	4	k__Bacteria; p__Bacteroidetes; c__Bacteroidia; o__Bacteroidales; f__Muribaculaceae; g__uncultured bacterium; s__uncultured bacterium
OTU_593	1	3	1	3	2	0	1	1	0	0	0	0	0	0	0	0	25	1	0	0	2	2	2	1	0	5	0	0	0	3	k__Bacteria; p__Bacteroidetes; c__Bacteroidia; o__Bacteroidales; f__Muribaculaceae; g__uncultured bacterium; s__uncultured bacterium
OTU_513	3	1	10	1	0	20	32	0	2	0	1	4	2	21	0	1	2	13	11	0	0	10	5	3	3	18	1	0	3	0	k__Bacteria; p__Bacteroidetes; c__Bacteroidia; o__Bacteroidales
OTU_1114	1	1	2	0	7	0	4	12	2	0	1	1	0	0	0	1	6	4	2	0	5	4	4	0	3	2	1	0	1	1	k__Bacteria; p__Firmicutes; c__Erysipelotrichia; o__Erysipelotrichales; f__Erysipelotrichaceae; g__Dubosiella; s__uncultured Erysipelotrichales bacterium
OTU_165	7	0	5	3	0	4	8	7	8	10	2	0	156	3	1	2	0	0	1	7	3	0	0	0	7	27	0	7	0	1	k__Bacteria; p__Firmicutes; c__Clostridia; o__Clostridiales; f__Lachnospiraceae
OTU_372	5	6	0	0	0	0	1	0	0	0	0	0	0	0	0	0	0	0	0	0	0	0	0	0	0	0	0	0	0	0	k__Bacteria; p__Bacteroidetes; c__Bacteroidia; o__Bacteroidales; f__Prevotellaceae
OTU_233	3	0	1	4	0	0	0	1	0	0	0	0	2	0	0	5	2	1	1	4	0	0	0	1	0	0	0	0	0	3	k__Bacteria; p__Firmicutes; c__Clostridia; o__Clostridiales; f__Eubacteriaceae; g__Anaerofustis; s__unidentified
OTU_384	1	0	0	0	0	1	0	2	3	0	0	0	0	6	0	0	0	0	0	0	0	0	0	0	0	0	0	0	0	0	k__Bacteria; p__Actinobacteria; c__Coriobacteriia; o__Coriobacteriales; f__Eggerthellaceae
OTU_497	2	0	0	1	0	0	0	0	0	0	0	0	0	0	0	0	0	0	0	0	0	0	0	0	0	0	0	0	0	0	k__Bacteria; p__Firmicutes; c__Clostridia; o__Clostridiales; f__Lachnospiraceae; g__Lachnospiraceae NK4A136 group; s__Lachnospiraceae bacterium COE1
OTU_1281	6	0	0	0	0	0	0	0	0	0	0	0	0	0	0	0	0	0	0	0	0	0	0	0	2	0	0	0	0	0	k__Bacteria; p__Bacteroidetes; c__Bacteroidia; o__Bacteroidales; f__Muribaculaceae; g__uncultured bacterium; s__uncultured bacterium
OTU_403	1	1	3	1	0	0	0	0	1	1	0	0	1	0	0	0	0	0	0	0	0	0	0	0	0	0	0	0	0	0	k__Bacteria; p__Proteobacteria; c__Alphaproteobacteria; o__Rhodobacterales; f__Rhodobacteraceae; g__Rubellimicrobium; s__uncultured bacterium
OTU_179	2	0	9	0	0	5	42	64	113	124	49	5	14	48	0	5	0	0	0	2	1	5	8	57	28	56	1	100	3	65	k__Bacteria; p__Firmicutes; c__Clostridia; o__Clostridiales; f__Lachnospiraceae; g__uncultured; s__uncultured bacterium
OTU_925	1	4	11	9	1	0	0	1	0	0	0	0	1	2	0	14	23	5	1	0	4	4	7	1	0	2	7	0	4	3	k__Bacteria; p__Bacteroidetes; c__Bacteroidia; o__Bacteroidales; f__Muribaculaceae; g__uncultured bacterium; s__uncultured bacterium
OTU_283	6	2	0	0	0	0	6	0	0	0	0	0	0	0	0	0	0	0	0	0	0	0	0	0	0	0	0	0	0	0	k__Bacteria; p__Firmicutes; c__Clostridia; o__Clostridiales; f__Family XI; g__Helcococcus
OTU_594	1	0	0	1	0	3	1	0	0	1	0	0	0	0	0	0	0	0	0	0	0	0	0	0	0	0	0	0	0	0	k__Bacteria; p__Actinobacteria; c__Actinobacteria; o__Pseudonocardiales; f__Pseudonocardiaceae; g__Saccharopolyspora rectivirgula; s__Saccharopolyspora rectivirgula
OTU_752	1	0	0	0	0	0	0	0	0	0	2	0	0	0	0	3	13	0	0	0	0	0	0	0	0	0	0	0	0	0	k__Bacteria; p__Bacteroidetes; c__Bacteroidia; o__Bacteroidales; f__Muribaculaceae; g__uncultured bacterium; s__uncultured bacterium
OTU_366	4	0	5	11	2	0	0	0	2	2	0	0	0	4	3	0	0	0	0	0	0	0	0	0	0	0	1	12	2	2	k__Bacteria; p__Firmicutes; c__Clostridia; o__Clostridiales; f__Lachnospiraceae; g__Lachnospiraceae NK4A136 group; s__uncultured bacterium
OTU_169	1	1	0	0	1	0	0	0	1	7	1	14	5	0	0	0	5	7	0	0	3	0	2	11	0	6	0	11	5	3	k__Bacteria; p__Cyanobacteria; c__Melainabacteria; o__Gastranaerophilales; f__uncultured bacterium; g__uncultured bacterium; s__uncultured bacterium
OTU_1013	9	0	2	0	12	0	1	0	1	2	25	16	10	2	0	4	7	4	4	6	5	7	0	17	15	9	1	0	4	8	k__Bacteria; p__Bacteroidetes; c__Bacteroidia; o__Bacteroidales; f__Muribaculaceae; g__uncultured bacterium; s__uncultured bacterium
OTU_641	4	38	16	52	11	1	1	0	1	1	7	12	6	10	1	45	233	19	10	5	9	7	4	3	1	8	11	4	36	29	k__Bacteria; p__Bacteroidetes; c__Bacteroidia; o__Bacteroidales; f__Muribaculaceae; g__uncultured bacterium; s__uncultured bacterium
OTU_446	3	2	0	2	19	0	0	5	1	0	0	0	2	0	0	2	0	4	2	2	1	2	2	0	0	0	2	0	2	0	k__Bacteria; p__Bacteroidetes; c__Bacteroidia; o__Bacteroidales; f__Muribaculaceae
OTU_1110	2	1	0	4	0	0	1	2	1	0	0	0	4	0	0	2	2	0	0	0	0	0	1	0	0	2	1	0	3	0	k__Bacteria; p__Bacteroidetes; c__Bacteroidia; o__Bacteroidales; f__Muribaculaceae
OTU_663	2	1	9	10	5	0	0	0	0	0	0	1	0	0	0	0	4	0	0	1	0	0	0	0	0	0	0	0	0	1	k__Bacteria; p__Bacteroidetes; c__Bacteroidia; o__Bacteroidales; f__Muribaculaceae
OTU_1080	5	5	10	14	6	0	0	0	2	2	1	1	4	0	0	12	71	14	0	2	5	2	7	5	0	14	3	0	4	3	k__Bacteria; p__Bacteroidetes; c__Bacteroidia; o__Bacteroidales; f__Muribaculaceae; g__uncultured bacterium; s__uncultured bacterium
OTU_1312	2	0	0	0	0	0	0	0	0	0	0	0	0	0	0	0	0	0	0	0	0	0	0	0	0	0	0	1	6	0	k__Bacteria; p__Bacteroidetes; c__Bacteroidia; o__Bacteroidales; f__Muribaculaceae
OTU_1215	2	0	0	0	0	0	0	0	0	0	0	0	1	0	0	2	0	1	2	2	0	1	1	8	4	2	0	0	0	0	k__Bacteria; p__Bacteroidetes; c__Bacteroidia; o__Bacteroidales; f__Muribaculaceae; g__uncultured bacterium; s__uncultured bacterium
OTU_819	2	1	0	0	0	0	1	0	0	2	0	0	0	0	0	0	0	0	0	0	0	0	0	1	0	0	0	0	0	0	k__Bacteria; p__Bacteroidetes; c__Bacteroidia; o__Bacteroidales; f__Muribaculaceae; g__uncultured bacterium; s__uncultured bacterium
OTU_1131	2	0	0	0	0	3	0	1	0	0	0	0	0	0	0	0	0	0	0	0	0	0	0	0	0	0	0	0	0	0	k__Bacteria; p__Actinobacteria; c__Actinobacteria; o__Micrococcales
OTU_755	1	0	0	0	0	0	0	0	0	0	0	0	0	0	0	0	0	0	0	0	0	0	0	0	0	0	0	0	2	0	k__Bacteria
OTU_969	3	0	0	0	0	0	0	0	0	0	0	0	0	0	0	0	0	0	0	1	0	0	0	0	0	0	0	0	0	0	k__Bacteria; p__Bacteroidetes; c__Bacteroidia; o__Bacteroidales; f__Muribaculaceae; g__uncultured bacterium; s__uncultured bacterium
OTU_120	2	0	0	0	0	12	9	76	61	35	57	33	494	2	0	0	8	1	5	7	13	11	6	0	1	0	0	0	0	49	k__Bacteria; p__Firmicutes; c__Clostridia; o__Clostridiales; f__Lachnospiraceae; g__uncultured; s__uncultured bacterium
OTU_660	2	0	1	0	0	0	0	0	0	1	0	0	0	0	0	0	0	2	9	4	0	0	0	0	0	0	0	0	0	0	k__Bacteria; p__Firmicutes; c__Erysipelotrichia; o__Erysipelotrichales; f__Erysipelotrichaceae; g__Faecalibaculum; s__Faecalibaculum rodentium
OTU_265	1	0	1	0	0	2	0	0	0	2	0	0	0	0	3	0	0	0	4	27	0	0	0	0	0	0	0	0	0	0	k__Bacteria; p__Bacteroidetes; c__Bacteroidia; o__Bacteroidales; f__Muribaculaceae; g__uncultured bacterium; s__uncultured bacterium
OTU_348	5	6	0	0	0	0	2	0	0	1	0	0	0	0	0	0	0	0	0	0	0	0	0	0	0	0	0	0	0	0	k__Bacteria; p__Firmicutes; c__Clostridia; o__Clostridiales; f__Family XI; g__Peptoniphilus
OTU_864	2	0	0	0	0	0	0	0	4	4	0	0	0	1	0	0	0	0	0	2	0	0	0	0	0	0	0	1	0	0	k__Bacteria; p__Firmicutes; c__Clostridia; o__Clostridiales; f__Lachnospiraceae
OTU_1142	1	0	0	0	0	0	0	0	0	0	0	3	0	1	0	3	0	1	1	1	0	0	0	0	0	0	0	0	3	0	k__Bacteria; p__Bacteroidetes; c__Bacteroidia; o__Bacteroidales
OTU_632	3	0	11	31	13	1	0	1	1	1	78	38	12	0	0	9	7	108	38	17	45	18	41	0	2	39	5	1	9	7	k__Bacteria; p__Firmicutes; c__Erysipelotrichia; o__Erysipelotrichales; f__Erysipelotrichaceae; g__Faecalibaculum; s__uncultured bacterium
OTU_495	1	1	0	2	0	0	0	0	0	0	0	1	0	0	0	0	0	2	4	2	0	0	0	0	0	0	0	0	0	0	k__Bacteria; p__Firmicutes; c__Erysipelotrichia; o__Erysipelotrichales; f__Erysipelotrichaceae; g__Dubosiella
OTU_1076	1	0	0	0	0	1	0	0	0	0	0	0	0	0	0	0	0	0	0	0	0	0	0	0	0	0	0	0	0	0	k__Bacteria; p__Chloroflexi; c__TK10
OTU_57	3	1	2	0	0	148	621	315	62	58	0	0	2	724	1	1	3	1	0	3	12	14	296	11	79	45	9	28	9	42	k__Bacteria; p__Firmicutes; c__Clostridia; o__Clostridiales; f__Ruminococcaceae; g__Ruminiclostridium; s__uncultured bacterium
OTU_489	5	0	0	0	0	0	0	0	0	0	0	0	0	9	0	6	0	0	0	0	1	4	0	41	6	3	4	0	4	0	k__Bacteria; p__Bacteroidetes; c__Bacteroidia; o__Bacteroidales; f__Muribaculaceae; g__uncultured bacterium; s__uncultured bacterium
OTU_1138	1	0	0	0	0	0	0	0	1	0	0	0	0	0	0	0	0	0	0	0	0	0	0	0	0	0	0	0	0	0	k__Bacteria; p__Proteobacteria; c__Alphaproteobacteria; o__Sphingomonadales; f__Sphingomonadaceae; g__Sphingobium
OTU_257	2	1	3	2	0	6	3	4	5	6	1	0	3	2	1	0	0	0	0	2	1	0	0	0	0	1	1	1	1	0	k__Bacteria; p__Actinobacteria; c__Actinobacteria; o__Micrococcales; f__Micrococcaceae; g__Pseudarthrobacter; s__Nesterenkonia sp.
OTU_344	1	2	0	0	0	0	1	3	0	2	0	0	0	0	0	0	0	0	0	0	0	0	0	0	0	0	0	0	0	0	k__Bacteria; p__Firmicutes; c__Clostridia; o__Clostridiales; f__Family XI; g__Murdochiella; s__Levyella massiliensis
OTU_910	1	10	6	9	1	0	3	3	2	0	0	0	3	0	0	1	29	2	0	0	0	6	3	4	0	5	0	0	2	7	k__Bacteria; p__Bacteroidetes; c__Bacteroidia; o__Bacteroidales; f__Muribaculaceae; g__uncultured bacterium; s__uncultured bacterium
OTU_1270	15	0	5	0	34	1	1	0	3	4	1	9	25	0	3	0	0	2	3	0	6	8	0	2	1	2	3	0	1	11	k__Bacteria; p__Bacteroidetes; c__Bacteroidia; o__Bacteroidales
OTU_518	1	2	0	3	0	5	0	0	0	0	0	0	0	0	0	0	0	0	0	0	1	0	0	0	0	0	0	0	1	0	k__Bacteria; p__Proteobacteria; c__Alphaproteobacteria; o__Rhizobiales; f__Xanthobacteraceae; g__Rhodopseudomonas
OTU_560	3	0	0	0	0	0	0	0	0	0	0	3	0	0	0	0	0	0	0	0	0	0	0	0	0	0	0	0	0	2	k__Bacteria
OTU_934	2	0	12	1	14	0	0	3	3	6	11	13	16	0	1	0	1	1	1	1	10	9	1	1	4	10	0	0	2	1	k__Bacteria; p__Bacteroidetes; c__Bacteroidia; o__Bacteroidales; f__Muribaculaceae
OTU_454	2	1	0	1	1	1	0	0	0	1	2	0	0	0	0	2	0	1	0	1	0	0	1	2	0	2	0	2	1	4	k__Bacteria; p__Bacteroidetes; c__Bacteroidia; o__Bacteroidales; f__Muribaculaceae; g__uncultured bacterium; s__uncultured bacterium
OTU_377	7	16	25	17	17	0	5	0	2	0	12	5	12	36	0	5	37	15	20	32	22	8	24	5	0	56	1	1	3	6	k__Bacteria; p__Bacteroidetes; c__Bacteroidia; o__Bacteroidales; f__Muribaculaceae; g__uncultured bacterium; s__uncultured bacterium
OTU_162	2	0	0	0	1	0	1	9	6	12	10	4	2	3	0	1	1	5	9	3	11	4	2	0	0	48	1	25	4	3	k__Bacteria; p__Firmicutes; c__Clostridia; o__Clostridiales; f__Lachnospiraceae; g__Lachnospiraceae NK4A136 group; s__Clostridiales bacterium CIEAF 020
OTU_480	1	0	0	0	0	0	2	0	0	3	0	0	0	0	0	0	0	0	0	0	0	0	0	0	0	0	0	0	0	0	k__Bacteria; p__Actinobacteria; c__Actinobacteria; o__Bifidobacteriales; f__Bifidobacteriaceae; g__Alloscardovia
OTU_758	1	0	0	0	2	0	0	0	0	0	0	0	0	0	0	0	0	0	0	0	0	0	0	0	0	0	0	0	0	0	k__Bacteria; p__Bacteroidetes; c__Bacteroidia; o__Bacteroidales; f__Muribaculaceae
OTU_457	1	1	0	0	0	0	0	0	1	0	1	1	0	0	0	1	0	0	1	0	0	0	0	0	0	0	0	0	0	0	k__Bacteria; p__Bacteroidetes; c__Bacteroidia; o__Bacteroidales; f__Marinifilaceae; g__Odoribacter; s__uncultured bacterium
OTU_944	1	1	0	0	0	0	0	0	0	0	0	0	0	0	0	0	0	0	0	0	0	0	0	0	0	0	0	0	0	0	k__Bacteria; p__Firmicutes; c__Bacilli; o__Lactobacillales
OTU_1068	1	0	0	0	0	0	1	0	0	0	1	0	0	0	0	0	0	0	0	0	2	0	0	0	1	0	20	0	0	0	k__Bacteria; p__Bacteroidetes; c__Bacteroidia; o__Bacteroidales; f__Bacteroidaceae; g__Bacteroides; s__Bacteroides acidifaciens JCM 10556
OTU_1247	2	0	0	0	0	0	0	0	0	0	0	0	0	1	0	0	0	0	0	0	0	0	0	0	0	0	0	0	0	0	k__Bacteria; p__Proteobacteria; c__Alphaproteobacteria; o__Acetobacterales; f__Acetobacteraceae; g__Roseomonas; s__metagenome
OTU_424	2	8	7	1	3	1	4	0	0	0	1	1	0	0	0	0	2	1	0	2	0	4	2	0	0	0	0	0	0	3	k__Bacteria; p__Bacteroidetes; c__Bacteroidia; o__Bacteroidales
OTU_369	1	0	1	0	0	1	1	0	1	1	0	0	3	0	0	4	0	0	0	0	0	0	0	0	0	0	0	1	0	2	k__Bacteria; p__Actinobacteria; c__Actinobacteria; o__Streptomycetales; f__Streptomycetaceae; g__Streptomyces; s__Streptomyces albus
OTU_256	2	2	3	3	1	14	8	5	1	0	8	1	1	3	3	1	0	8	6	7	8	4	4	3	8	10	1	0	2	0	k__Bacteria; p__Firmicutes; c__Bacilli; o__Bacillales; f__Thermoactinomycetaceae; g__Kroppenstedtia
OTU_275	3	1	0	4	0	0	0	0	15	14	0	0	0	0	0	0	0	0	0	0	1	0	1	0	0	0	0	0	0	0	k__Bacteria; p__Firmicutes; c__Bacilli; o__Bacillales; f__Bacillaceae; g__Oceanobacillus
OTU_830	1	0	0	0	0	0	0	1	0	0	1	0	0	0	0	0	0	1	0	0	5	1	3	0	0	0	0	0	0	0	k__Bacteria
OTU_774	1	0	0	1	0	0	0	0	0	0	0	0	0	0	0	3	2	0	0	0	1	0	0	2	0	0	0	2	2	1	k__Bacteria; p__Bacteroidetes; c__Bacteroidia; o__Bacteroidales; f__Muribaculaceae; g__uncultured bacterium; s__uncultured bacterium
OTU_638	3	0	4	0	0	1	0	1	1	0	0	0	0	0	0	0	0	0	0	0	0	0	0	0	0	0	0	0	0	0	k__Bacteria; p__Chloroflexi; c__Chloroflexia; o__Thermomicrobiales; f__JG30-KF-CM45
OTU_321	2	1	1	0	0	0	0	0	0	0	0	0	0	3	3	0	0	0	0	0	0	0	0	0	0	0	0	0	0	0	k__Bacteria; p__Cyanobacteria; c__Oxyphotobacteria; o__Nostocales; f__Microcystaceae; g__Microcystis PCC-7914; s__Microcystis aeruginosa DIANCHI905
OTU_1258	3	0	0	0	0	0	8	1	0	6	3	4	0	5	0	1	0	2	2	4	0	5	0	2	2	1	5	0	1	13	k__Bacteria; p__Bacteroidetes; c__Bacteroidia; o__Bacteroidales; f__Muribaculaceae; g__uncultured bacterium; s__uncultured bacterium
OTU_306	1	1	0	0	0	0	0	0	0	0	0	0	0	1	1	0	3	1	0	1	5	0	0	3	2	1	0	1	0	0	k__Bacteria; p__Proteobacteria; c__Gammaproteobacteria; o__Betaproteobacteriales; f__Burkholderiaceae; g__Parasutterella; s__Burkholderiales bacterium YL45
OTU_358	1	0	11	2	2	6	26	7	13	11	4	17	14	2	0	10	0	18	20	33	1	8	4	8	9	3	22	5	0	28	k__Bacteria; p__Bacteroidetes; c__Bacteroidia; o__Bacteroidales; f__Muribaculaceae; g__uncultured bacterium; s__uncultured bacterium
OTU_966	2	0	0	0	0	0	0	0	0	0	0	0	0	0	0	0	0	0	0	0	0	0	0	0	0	0	0	0	0	0	k__Bacteria; p__Chloroflexi; c__Gitt-GS-136
OTU_1265	1	0	0	0	0	1	0	0	0	1	0	0	0	0	0	0	0	0	0	0	0	0	0	0	0	0	0	0	0	0	k__Bacteria; p__Actinobacteria; c__Acidimicrobiia; o__Microtrichales; f__Iamiaceae; g__Iamia
OTU_874	2	1	10	28	0	0	6	6	3	5	1	0	2	0	0	16	28	8	0	0	0	4	8	0	0	44	0	1	1	16	k__Bacteria; p__Bacteroidetes; c__Bacteroidia; o__Bacteroidales; f__Muribaculaceae
OTU_425	4	46	38	42	37	11	18	0	7	2	15	6	17	67	0	7	54	28	42	58	78	25	87	6	0	139	1	1	0	27	k__Bacteria; p__Bacteroidetes; c__Bacteroidia; o__Bacteroidales; f__Muribaculaceae; g__uncultured bacterium; s__uncultured bacterium
OTU_428	1	1	0	0	0	0	3	8	4	5	0	0	0	0	0	0	0	0	0	0	0	0	0	0	0	0	0	0	0	0	k__Bacteria; p__Bacteroidetes; c__Bacteroidia; o__Bacteroidales; f__Bacteroidaceae; g__Bacteroides
OTU_532	4	0	8	29	3	0	0	3	0	0	6	3	2	8	3	31	15	3	3	12	3	14	11	2	2	10	12	1	2	6	k__Bacteria; p__Bacteroidetes; c__Bacteroidia; o__Bacteroidales; f__Muribaculaceae; g__uncultured bacterium; s__uncultured bacterium
OTU_1021	1	4	0	1	0	3	0	0	0	0	0	0	1	0	0	0	0	0	0	0	0	0	0	0	0	0	0	0	0	0	k__Bacteria; p__Actinobacteria; c__Actinobacteria; o__Micrococcales; f__Microbacteriaceae; g__Microbacterium; s__Microbacterium esteraromaticum
OTU_47	1	28	2	0	0	94	244	142	56	18	332	512	327	83	0	0	151	72	0	0	141	151	161	0	0	0	46	297	155	0	k__Bacteria; p__Bacteroidetes; c__Bacteroidia; o__Bacteroidales; f__Prevotellaceae; g__Prevotellaceae UCG-001; s__uncultured Bacteroidales bacterium
OTU_546	1	3	2	4	10	1	5	20	6	6	1	0	0	1	0	1	4	28	4	2	85	20	66	1	1	2	22	1	8	3	k__Bacteria; p__Firmicutes; c__Erysipelotrichia; o__Erysipelotrichales; f__Erysipelotrichaceae; g__Faecalibaculum; s__Faecalibaculum rodentium
OTU_226	2	1	1	6	8	0	0	0	2	2	5	4	7	0	0	0	0	0	0	0	0	0	0	0	0	4	1	2	1	0	k__Bacteria; p__Bacteroidetes; c__Bacteroidia; o__Bacteroidales; f__Muribaculaceae; g__uncultured bacterium; s__uncultured bacterium
OTU_148	1	14	0	0	0	13	18	4	7	37	16	3	36	27	0	44	0	9	0	0	0	3	0	1	5	0	2	10	1	8	k__Bacteria; p__Firmicutes; c__Clostridia; o__Clostridiales; f__Family XIII; g__[Eubacterium] nodatum group; s__uncultured bacterium
OTU_220	1	5	0	0	0	0	0	10	12	5	0	0	0	0	0	0	0	0	0	0	0	0	0	0	0	0	0	0	0	0	k__Bacteria; p__Fusobacteria; c__Fusobacteriia; o__Fusobacteriales; f__Fusobacteriaceae; g__Fusobacterium
OTU_813	1	12	0	0	0	0	2	2	0	0	0	0	0	9	0	7	0	1	3	0	0	0	0	25	3	4	1	0	5	0	k__Bacteria; p__Bacteroidetes; c__Bacteroidia; o__Bacteroidales; f__Muribaculaceae; g__uncultured bacterium; s__uncultured bacterium
OTU_130	1	6	1	2	1	1	17	19	16	63	0	0	1	1	0	1	12	6	8	7	127	116	161	2	0	0	0	1	1	0	k__Bacteria; p__Bacteroidetes; c__Bacteroidia; o__Bacteroidales; f__Muribaculaceae
OTU_1323	2	0	0	0	0	0	0	0	0	0	0	0	0	0	0	0	0	0	0	0	0	0	0	0	0	0	0	0	0	0	k__Bacteria; p__Bacteroidetes; c__Bacteroidia; o__Bacteroidales; f__Muribaculaceae; g__uncultured bacterium; s__uncultured bacterium
OTU_967	2	0	0	0	0	0	0	0	0	0	0	0	0	0	0	0	0	0	0	0	0	0	0	0	0	0	0	0	0	0	k__Bacteria; p__Chloroflexi; c__Chloroflexia; o__Chloroflexales; f__Herpetosiphonaceae; g__Herpetosiphon; s__uncultured Chloroflexi bacterium
OTU_520	2	1	2	4	1	0	0	1	0	0	0	0	1	0	0	3	2	2	0	1	0	0	0	4	0	4	0	0	0	1	k__Bacteria; p__Bacteroidetes; c__Bacteroidia; o__Bacteroidales; f__Muribaculaceae; g__uncultured bacterium; s__uncultured bacterium
OTU_259	3	5	1	0	1	4	0	0	0	0	3	2	4	2	1	10	0	1	0	0	0	0	0	0	0	4	0	0	2	1	k__Bacteria; p__Bacteroidetes; c__Bacteroidia; o__Bacteroidales; f__Muribaculaceae; g__uncultured bacterium; s__uncultured bacterium
OTU_436	1	0	0	0	1	0	0	1	0	0	0	0	0	2	0	0	0	1	0	2	0	0	0	0	0	1	0	0	0	0	k__Bacteria; p__Proteobacteria; c__Alphaproteobacteria; o__Caulobacterales; f__Caulobacteraceae; g__Caulobacter; s__uncultured bacterium
OTU_271	3	2	0	0	0	0	10	0	2	0	0	0	0	0	0	0	0	0	0	0	0	0	0	0	0	0	0	0	0	0	k__Bacteria; p__Proteobacteria; c__Gammaproteobacteria; o__Pasteurellales; f__Pasteurellaceae
OTU_1264	2	8	1	15	1	0	3	1	0	6	0	2	1	0	0	11	39	2	0	5	2	6	6	0	0	9	3	7	5	9	k__Bacteria; p__Bacteroidetes; c__Bacteroidia; o__Bacteroidales; f__Muribaculaceae; g__uncultured bacterium; s__uncultured bacterium
OTU_232	1	10	0	6	3	21	7	5	1	1	0	3	3	3	1	3	0	0	1	1	1	0	0	0	0	4	4	4	1	0	k__Bacteria; p__Proteobacteria; c__Alphaproteobacteria; o__Rhizobiales; f__Xanthobacteraceae; g__Bradyrhizobium
OTU_336	4	15	24	8	10	9	5	0	16	2	24	19	37	46	1	1	8	2	9	24	30	27	12	6	0	2	0	2	6	0	k__Bacteria; p__Bacteroidetes; c__Bacteroidia; o__Bacteroidales
OTU_363	2	0	3	9	6	1	9	5	1	7	1	8	0	7	1	3	3	2	2	5	1	2	3	3	4	24	1	2	6	29	k__Bacteria; p__Bacteroidetes; c__Bacteroidia; o__Bacteroidales
OTU_839	1	0	0	0	0	0	0	0	0	1	0	0	0	0	0	0	0	0	0	0	2	0	0	0	0	0	0	0	0	0	k__Bacteria; p__Bacteroidetes; c__Bacteroidia; o__Bacteroidales
OTU_352	1	1	0	0	0	0	0	2	1	1	0	0	0	0	0	0	0	0	0	0	0	0	0	0	0	0	0	0	0	0	k__Bacteria; p__Proteobacteria; c__Gammaproteobacteria; o__Betaproteobacteriales; f__Burkholderiaceae
OTU_231	3	5	0	2	5	0	0	0	1	11	9	6	8	2	2	3	0	0	4	26	0	0	0	0	0	2	5	0	1	2	k__Bacteria; p__Bacteroidetes; c__Bacteroidia; o__Bacteroidales; f__Muribaculaceae
OTU_504	3	0	2	3	0	0	0	0	0	0	0	0	0	0	0	0	1	0	0	3	0	0	0	0	0	0	0	0	0	0	k__Bacteria; p__Firmicutes; c__Clostridia; o__Clostridiales; f__Lachnospiraceae; g__Blautia; s__uncultured bacterium
OTU_1003	1	0	0	0	0	0	0	0	0	4	0	0	0	0	0	2	0	0	0	0	0	0	0	0	0	0	0	0	0	1	k__Bacteria; p__Bacteroidetes; c__Bacteroidia; o__Bacteroidales
OTU_1116	1	1	2	0	0	0	0	0	0	0	0	0	0	0	0	0	0	0	0	0	0	0	0	0	0	0	0	0	0	0	k__Bacteria; p__Bacteroidetes; c__Bacteroidia; o__Bacteroidales
OTU_264	1	1	1	0	2	0	0	0	2	0	2	0	1	3	1	2	0	2	1	2	0	2	0	1	0	0	0	1	0	1	k__Bacteria; p__Bacteroidetes; c__Bacteroidia; o__Bacteroidales; f__Muribaculaceae; g__uncultured bacterium; s__uncultured bacterium
OTU_396	2	2	0	0	0	0	2	0	0	0	0	0	0	0	0	0	0	0	0	0	0	0	0	0	0	0	0	0	0	0	k__Bacteria; p__Patescibacteria; c__Saccharimonadia; o__Saccharimonadales; f__Saccharimonadaceae; g__uncultured bacterium; s__uncultured bacterium
OTU_21	1	2	138	308	7	327	445	1427	928	1454	666	891	471	4	0	0	2	132	1	1	1111	420	586	1	0	180	280	1194	1290	0	k__Bacteria; p__Bacteroidetes; c__Bacteroidia; o__Bacteroidales; f__Bacteroidaceae; g__Bacteroides
OTU_1158	2	0	0	0	1	0	0	0	0	0	1	0	0	0	0	0	0	0	0	0	0	0	0	0	0	0	0	0	0	0	k__Bacteria; p__Bacteroidetes; c__Bacteroidia; o__Bacteroidales
OTU_1337	1	0	3	3	2	0	0	0	0	0	1	0	6	0	1	4	12	15	1	0	15	2	14	0	0	4	5	0	2	2	k__Bacteria; p__Bacteroidetes; c__Bacteroidia; o__Bacteroidales; f__Muribaculaceae; g__uncultured bacterium; s__uncultured bacterium
OTU_580	1	0	0	0	0	0	1	0	0	0	0	0	0	0	0	3	0	0	0	0	1	0	0	0	0	1	0	2	0	0	k__Bacteria; p__Firmicutes; c__Bacilli; o__Lactobacillales; f__Lactobacillaceae; g__Lactobacillus; s__Lactobacillus plantarum
OTU_23	1	25	349	230	50	311	643	654	653	689	400	474	722	987	26	577	31	600	441	1484	134	305	397	101	326	215	882	321	253	2196	k__Bacteria; p__Bacteroidetes; c__Bacteroidia; o__Bacteroidales; f__Muribaculaceae; g__uncultured Bacteroidales bacterium; s__uncultured Bacteroidales bacterium
OTU_581	1	4	3	1	1	0	0	1	0	1	1	2	0	0	0	3	22	4	0	3	0	0	6	0	0	2	0	1	5	3	k__Bacteria; p__Firmicutes; c__Erysipelotrichia; o__Erysipelotrichales; f__Erysipelotrichaceae; g__Dubosiella; s__uncultured Erysipelotrichales bacterium
OTU_76	1	29	0	2	0	0	0	0	0	1	1	0	2	399	10	23	231	298	64	42	0	0	1	0	1	0	105	20	394	0	k__Bacteria; p__Bacteroidetes; c__Bacteroidia; o__Bacteroidales; f__Muribaculaceae; g__uncultured bacterium; s__uncultured bacterium
OTU_1140	1	0	0	0	0	1	0	0	0	0	0	0	0	0	0	0	1	0	0	0	0	0	0	2	0	2	0	0	0	0	k__Bacteria
OTU_432	1	4	0	0	0	0	1	1	3	0	0	0	0	0	0	0	0	0	0	0	0	0	0	0	0	0	0	0	0	0	k__Bacteria; p__Proteobacteria; c__Gammaproteobacteria; o__Pasteurellales; f__Pasteurellaceae
OTU_976	1	1	1	3	3	0	4	0	1	1	0	0	0	3	0	1	1	0	0	1	0	1	0	2	1	1	2	0	1	2	k__Bacteria; p__Bacteroidetes; c__Bacteroidia; o__Bacteroidales; f__Muribaculaceae; g__uncultured bacterium; s__uncultured bacterium
OTU_240	1	0	7	0	4	0	0	0	0	0	0	0	1	0	2	0	2	0	2	3	0	0	0	0	5	4	0	0	1	0	k__Bacteria; p__Firmicutes; c__Clostridia; o__Clostridiales; f__Ruminococcaceae
OTU_475	1	0	1	0	0	0	0	0	0	0	0	0	0	0	2	0	0	0	0	0	0	0	0	0	0	0	0	0	0	0	k__Bacteria; p__Proteobacteria; c__Gammaproteobacteria; o__Betaproteobacteriales; f__Burkholderiaceae; g__uncultured; s__uncultured bacterium
OTU_85	1	0	0	0	0	13	127	57	453	306	0	0	0	0	0	0	0	0	0	0	3	1	0	27	55	19	3	455	30	300	k__Bacteria; p__Firmicutes; c__Clostridia; o__Clostridiales; f__Lachnospiraceae
OTU_882	1	0	0	0	0	0	3	0	1	0	0	0	0	4	0	0	0	0	0	1	0	0	0	0	0	0	0	0	0	0	k__Bacteria; p__Bacteroidetes; c__Bacteroidia; o__Bacteroidales; f__Muribaculaceae; g__uncultured bacterium; s__uncultured bacterium
OTU_988	2	1	0	0	0	0	0	0	0	0	0	0	0	0	0	0	0	0	1	0	0	0	0	0	0	0	0	0	0	0	k__Bacteria; p__Verrucomicrobia; c__Verrucomicrobiae; o__Verrucomicrobiales; f__Akkermansiaceae; g__Akkermansia; s__unidentified
OTU_564	1	0	0	0	0	0	0	3	1	1	0	1	0	0	0	0	0	0	0	0	0	0	0	0	0	0	0	0	0	0	k__Bacteria; p__Proteobacteria; c__Gammaproteobacteria; o__Pseudomonadales; f__Pseudomonadaceae; g__Pseudomonas
OTU_1259	1	2	15	3	38	12	16	11	11	7	3	3	11	34	0	1	0	0	6	70	11	10	17	3	2	5	7	1	2	12	k__Bacteria; p__Bacteroidetes; c__Bacteroidia; o__Bacteroidales; f__Muribaculaceae
OTU_1209	1	0	2	1	0	0	0	0	0	0	0	0	0	0	0	2	0	0	0	0	0	0	0	0	0	0	0	0	0	0	k__Bacteria; p__Proteobacteria; c__Alphaproteobacteria; o__Rhodobacterales; f__Rhodobacteraceae
OTU_1001	1	1	2	1	4	0	7	0	0	0	0	0	0	5	0	0	0	1	1	4	0	0	0	1	2	10	0	0	0	1	k__Bacteria; p__Bacteroidetes; c__Bacteroidia; o__Bacteroidales; f__Muribaculaceae; g__uncultured bacterium; s__uncultured bacterium
OTU_468	3	0	0	0	1	0	0	0	0	0	0	0	0	0	0	0	0	0	0	0	0	1	0	0	0	0	0	0	1	0	k__Bacteria; p__Bacteroidetes; c__Bacteroidia; o__Bacteroidales; f__Bacteroidaceae; g__Bacteroides
OTU_472	1	0	0	1	0	0	0	0	0	0	1	0	1	0	1	0	0	0	0	0	0	0	0	0	0	0	0	1	1	1	k__Bacteria; p__Bacteroidetes; c__Bacteroidia; o__Bacteroidales; f__Rikenellaceae; g__Alistipes; s__uncultured bacterium
OTU_370	1	0	0	0	0	0	0	2	1	8	0	0	0	0	0	0	0	0	0	0	0	0	0	0	0	0	0	0	0	0	k__Bacteria; p__Firmicutes; c__Negativicutes; o__Selenomonadales; f__Veillonellaceae; g__Dialister
OTU_990	2	0	0	0	0	0	0	0	0	0	0	0	0	0	0	0	0	0	0	0	0	0	0	0	0	0	0	0	0	0	k__Bacteria; p__Acidobacteria; c__Blastocatellia (Subgroup 4)
OTU_332	1	2	2	2	3	0	0	0	2	3	1	1	5	1	1	1	0	0	0	0	0	0	0	0	0	1	0	0	0	0	k__Bacteria; p__Bacteroidetes; c__Bacteroidia; o__Bacteroidales; f__Muribaculaceae; g__uncultured bacterium; s__uncultured bacterium
OTU_608	1	2	0	3	2	0	1	1	0	1	0	0	0	0	0	0	0	0	0	0	1	0	5	0	0	0	6	0	0	1	k__Bacteria; p__Bacteroidetes; c__Bacteroidia; o__Bacteroidales; f__Muribaculaceae
OTU_1202	2	0	0	0	0	0	0	0	0	0	0	0	0	0	0	0	0	0	0	0	4	0	0	0	0	0	0	0	2	0	k__Bacteria; p__Bacteroidetes; c__Bacteroidia; o__Bacteroidales
OTU_193	1	0	0	4	0	2	4	0	83	4	1	5	0	5	0	3	0	0	0	27	1	4	0	0	1	0	2	3	0	4	k__Bacteria; p__Firmicutes; c__Clostridia; o__Clostridiales; f__Ruminococcaceae; g__Faecalibacterium; s__uncultured bacterium
OTU_680	2	1	0	19	14	4	0	3	8	2	3	0	0	0	0	0	0	1	10	2	22	5	5	0	0	0	0	2	3	0	k__Bacteria; p__Firmicutes; c__Erysipelotrichia; o__Erysipelotrichales; f__Erysipelotrichaceae; g__Faecalibaculum; s__Faecalibaculum rodentium
OTU_963	2	0	0	0	0	0	0	0	0	0	0	0	0	0	0	0	0	0	0	0	0	0	0	0	0	0	0	0	0	0	k__Bacteria; p__Bacteroidetes; c__Bacteroidia; o__Bacteroidales
OTU_533	1	3	5	1	0	0	0	0	4	0	0	0	3	0	1	0	0	0	0	0	0	0	0	0	0	0	0	0	0	0	k__Bacteria; p__Actinobacteria; c__Actinobacteria; o__Frankiales; f__Geodermatophilaceae; g__Blastococcus; s__uncultured bacterium
OTU_1112	1	0	0	0	2	0	1	0	0	0	0	0	0	0	1	0	0	0	0	0	0	0	0	0	0	0	0	0	0	0	k__Bacteria; p__Bacteroidetes; c__Bacteroidia; o__Bacteroidales; f__Muribaculaceae; g__uncultured bacterium; s__uncultured bacterium
OTU_970	2	0	0	0	0	0	0	0	0	0	0	0	0	0	0	0	0	0	0	0	0	0	0	0	0	0	0	0	0	0	k__Bacteria; p__Bacteroidetes; c__Bacteroidia; o__Bacteroidales; f__Muribaculaceae; g__uncultured bacterium; s__uncultured bacterium
OTU_559	1	3	0	0	17	0	1	0	0	0	2	0	0	0	0	0	0	1	1	1	0	0	0	2	2	2	0	0	0	1	k__Bacteria; p__Bacteroidetes; c__Bacteroidia; o__Bacteroidales; f__Muribaculaceae; g__uncultured bacterium; s__uncultured bacterium
OTU_1185	2	0	0	0	0	0	0	0	0	0	0	0	0	0	0	0	0	0	0	0	0	0	0	0	0	0	0	0	0	0	k__Bacteria; p__Bacteroidetes; c__Bacteroidia; o__Bacteroidales; f__Muribaculaceae
OTU_287	0	7	0	0	0	0	0	0	0	0	0	0	0	0	0	3	3	0	3	0	3	7	10	2	2	0	0	2	0	0	k__Bacteria; p__Firmicutes; c__Clostridia; o__Clostridiales; f__Ruminococcaceae; g__Ruminococcaceae UCG-005
OTU_53	0	96	61	93	34	0	0	0	0	0	354	159	528	38	0	1	62	0	1	0	24	105	2	6	9	40	324	55	62	1	k__Bacteria; p__Firmicutes; c__Erysipelotrichia; o__Erysipelotrichales; f__Erysipelotrichaceae; g__Erysipelatoclostridium; s__uncultured bacterium
OTU_760	0	21	6	27	1	0	2	3	8	2	0	0	0	0	0	35	89	6	0	0	0	6	13	4	0	0	1	0	1	17	k__Bacteria; p__Bacteroidetes; c__Bacteroidia; o__Bacteroidales; f__Muribaculaceae; g__uncultured bacterium; s__uncultured bacterium
OTU_224	0	17	0	1	0	2	41	19	2	3	1	1	0	0	0	23	2	21	0	0	0	0	0	0	0	0	0	0	6	0	k__Bacteria; p__Bacteroidetes; c__Bacteroidia; o__Bacteroidales; f__Muribaculaceae; g__uncultured bacterium; s__uncultured bacterium
OTU_571	0	1	0	0	0	0	0	0	3	0	0	0	0	0	0	0	0	0	0	0	0	0	0	0	0	0	0	0	0	0	k__Bacteria; p__Acidobacteria; c__Blastocatellia (Subgroup 4); o__Blastocatellales; f__Blastocatellaceae
OTU_1168	0	4	1	0	0	0	2	0	1	0	1	0	0	3	0	0	3	1	0	2	5	2	1	0	0	3	0	0	0	0	k__Bacteria; p__Bacteroidetes; c__Bacteroidia; o__Bacteroidales; f__Muribaculaceae; g__uncultured bacterium; s__uncultured bacterium
OTU_93	0	103	33	146	46	16	40	90	63	41	0	0	0	103	0	282	211	41	0	0	79	107	171	143	47	1	7	6	57	152	k__Bacteria; p__Bacteroidetes; c__Bacteroidia; o__Bacteroidales; f__Muribaculaceae; g__uncultured bacterium; s__uncultured bacterium
OTU_36	0	33	36	326	0	2	0	2	0	0	1287	495	1759	111	2	650	6	143	0	0	31	261	162	162	142	0	61	10	201	41	k__Bacteria; p__Firmicutes; c__Clostridia; o__Clostridiales; f__Lachnospiraceae; g__[Eubacterium] fissicatena group; s__uncultured bacterium
OTU_150	0	8	0	0	0	7	5	6	0	0	1	0	3	16	1	7	16	4	12	23	0	0	0	5	27	7	0	1	0	32	k__Bacteria; p__Firmicutes; c__Clostridia; o__Clostridiales; f__Lachnospiraceae
OTU_721	0	5	0	1	0	8	0	0	2	0	0	0	0	0	0	0	0	0	0	0	0	0	0	0	0	0	0	0	0	0	k__Bacteria; p__Actinobacteria; c__Actinobacteria; o__Micrococcales; f__Microbacteriaceae
OTU_689	0	1	0	3	0	0	0	0	0	0	0	0	0	4	1	4	0	0	0	2	0	1	0	2	0	2	4	0	2	0	k__Bacteria; p__Bacteroidetes; c__Bacteroidia; o__Bacteroidales; f__Bacteroidaceae; g__Bacteroides
OTU_1050	0	1	3	1	3	17	58	0	5	6	2	3	1	7	0	3	2	2	2	9	4	1	4	1	1	7	0	0	0	4	k__Bacteria; p__Bacteroidetes; c__Bacteroidia; o__Bacteroidales; f__Muribaculaceae; g__uncultured bacterium; s__uncultured bacterium
OTU_634	0	2	1	1	0	0	0	0	0	0	0	0	0	0	1	2	0	0	0	0	0	0	0	2	0	0	0	0	0	0	k__Bacteria; p__Bacteroidetes; c__Bacteroidia; o__Bacteroidales
OTU_69	0	14	41	38	0	0	0	26	30	44	109	127	5	22	0	0	121	198	166	124	0	0	1	0	0	0	0	0	0	0	k__Bacteria; p__Tenericutes; c__Mollicutes; o__Anaeroplasmatales; f__Anaeroplasmataceae; g__Anaeroplasma; s__uncultured bacterium
OTU_1113	0	2	0	0	0	0	0	0	0	0	0	0	0	0	0	0	0	0	0	0	0	0	0	0	0	0	0	0	0	0	k__Bacteria; p__Bacteroidetes; c__Bacteroidia; o__Sphingobacteriales; f__Sphingobacteriaceae; g__Olivibacter
OTU_623	0	9	1	4	0	0	1	0	0	1	0	1	2	0	0	2	44	0	0	1	0	2	5	0	0	3	0	0	0	3	k__Bacteria; p__Bacteroidetes; c__Bacteroidia; o__Bacteroidales; f__Muribaculaceae; g__uncultured bacterium; s__uncultured bacterium
OTU_230	0	28	1	0	0	0	0	0	0	0	0	0	0	0	0	0	0	0	1	0	0	0	0	0	2	0	0	0	0	0	k__Bacteria; p__Proteobacteria; c__Deltaproteobacteria; o__Desulfovibrionales; f__Desulfovibrionaceae; g__Desulfovibrio; s__Desulfovibrio fairfieldensis
OTU_515	0	5	1	8	15	0	7	0	0	0	0	0	0	5	0	3	1	0	0	0	0	2	0	7	1	0	0	0	0	12	k__Bacteria; p__Bacteroidetes; c__Bacteroidia; o__Bacteroidales; f__Muribaculaceae; g__uncultured bacterium; s__uncultured bacterium
OTU_405	0	4	0	0	0	0	0	0	6	1	0	0	0	0	0	0	0	0	1	0	0	0	0	0	0	0	0	0	0	0	k__Bacteria; p__Firmicutes; c__Bacilli; o__Bacillales; f__Bacillaceae; g__Pseudogracilibacillus
OTU_75	0	7	2	1	2	87	97	125	199	187	74	54	192	3	1	233	18	148	132	240	48	60	77	617	128	449	153	231	288	2	k__Bacteria; p__Bacteroidetes; c__Bacteroidia; o__Bacteroidales; f__Muribaculaceae; g__uncultured bacterium; s__uncultured bacterium
OTU_30	0	10	429	24	7	854	210	932	350	748	164	203	233	0	0	56	74	63	0	0	35	58	101	382	186	0	88	141	279	0	k__Bacteria; p__Bacteroidetes; c__Bacteroidia; o__Bacteroidales; f__Rikenellaceae; g__Alistipes; s__gut metagenome
OTU_373	0	2	0	1	0	10	1	7	7	7	17	13	0	0	0	14	9	57	11	7	32	7	12	0	0	2	2	0	8	21	k__Bacteria; p__Firmicutes; c__Erysipelotrichia; o__Erysipelotrichales; f__Erysipelotrichaceae; g__Ileibacterium; s__Erysipelotrichaceae bacterium NYU-BL-F16
OTU_66	0	1	0	0	0	0	0	0	0	0	0	0	1	0	0	1	2	0	0	0	0	3	0	1	7	0	97	950	30	3	k__Bacteria; p__Epsilonbacteraeota; c__Campylobacteria; o__Campylobacterales; f__Helicobacteraceae; g__Helicobacter
OTU_67	0	13	6	2	0	332	730	155	563	166	47	156	2781	218	0	9	56	4	84	156	61	31	120	120	474	3	29	63	9	19	k__Bacteria; p__Firmicutes; c__Clostridia; o__Clostridiales; f__Ruminococcaceae
OTU_40	0	29	94	171	21	68	131	361	136	290	165	208	54	95	37	151	175	151	150	149	202	291	204	345	118	163	185	596	449	369	k__Bacteria; p__Bacteroidetes; c__Bacteroidia; o__Bacteroidales; f__Muribaculaceae; g__uncultured bacterium; s__uncultured bacterium
OTU_1213	0	5	2	0	0	1	0	0	1	0	0	0	0	0	0	0	0	0	0	0	0	0	0	0	0	0	0	0	0	0	k__Bacteria; p__Actinobacteria; c__Acidimicrobiia; o__IMCC26256
OTU_280	0	15	0	2	0	0	0	2	0	0	0	1	1	0	0	1	0	0	3	0	0	0	23	0	0	1	0	0	0	1	k__Bacteria; p__Firmicutes; c__Bacilli; o__Lactobacillales; f__Enterococcaceae; g__Enterococcus; s__Enterococcus faecium
OTU_234	0	4	0	0	0	5	3	36	0	13	0	0	1	0	1	4	1	0	0	2	2	1	0	0	0	0	2	7	0	1	k__Bacteria; p__Firmicutes; c__Bacilli; o__Bacillales; f__Staphylococcaceae; g__Staphylococcus
OTU_222	0	59	171	193	39	0	2	7	5	12	5	0	0	0	1	0	164	342	287	604	3	5	3	0	0	0	12	1	5	1	k__Bacteria; p__Bacteroidetes; c__Bacteroidia; o__Bacteroidales; f__Bacteroidaceae; g__Bacteroides
OTU_380	0	8	0	0	2	1	1	0	0	0	0	0	0	0	0	1	2	0	0	0	2	0	0	2	1	0	0	0	0	0	k__Bacteria; p__Bacteroidetes; c__Bacteroidia; o__Bacteroidales
OTU_223	0	2	0	0	0	0	0	0	0	0	0	0	0	0	0	0	0	0	0	0	0	0	1	0	1	0	1	0	0	74	k__Bacteria; p__Firmicutes; c__Clostridia; o__Clostridiales; f__Ruminococcaceae; g__Ruminococcaceae UCG-013
OTU_484	0	2	0	0	2	0	0	0	0	0	2	3	0	1	0	0	2	0	0	0	0	0	0	0	0	0	0	0	0	0	k__Bacteria; p__Bacteroidetes; c__Bacteroidia; o__Bacteroidales; f__Muribaculaceae; g__uncultured bacterium; s__uncultured bacterium
OTU_711	0	5	1	2	0	0	0	0	0	0	0	0	0	0	0	0	1	0	0	0	0	0	0	0	0	0	0	0	0	0	k__Bacteria; p__Bacteroidetes; c__Bacteroidia; o__Bacteroidales
OTU_1308	0	1	0	0	0	2	0	4	1	1	0	0	0	0	0	1	0	0	1	7	1	0	0	0	1	0	0	1	1	0	k__Bacteria; p__Firmicutes; c__Erysipelotrichia; o__Erysipelotrichales; f__Erysipelotrichaceae; g__Faecalibaculum; s__Faecalibaculum rodentium
OTU_1127	0	1	0	2	0	0	0	0	0	0	8	1	0	0	0	0	0	0	0	0	0	0	0	0	0	0	1	1	0	0	k__Bacteria; p__Firmicutes; c__Erysipelotrichia; o__Erysipelotrichales; f__Erysipelotrichaceae; g__Faecalibaculum; s__Faecalibaculum rodentium
OTU_98	0	34	0	0	0	0	0	0	0	0	0	0	0	0	0	0	0	0	0	0	0	0	0	0	0	541	80	48	81	0	k__Bacteria; p__Bacteroidetes; c__Bacteroidia; o__Bacteroidales; f__Rikenellaceae; g__Rikenella; s__uncultured bacterium
OTU_975	0	9	9	17	2	0	0	0	1	0	1	10	6	0	0	4	46	4	0	2	3	6	0	2	0	5	1	1	5	7	k__Bacteria; p__Bacteroidetes; c__Bacteroidia; o__Bacteroidales; f__Rikenellaceae; g__Rikenellaceae RC9 gut group; s__uncultured bacterium
OTU_1147	0	2	2	3	0	0	0	0	0	0	0	0	0	0	0	0	18	1	0	0	0	1	0	0	0	4	0	0	0	0	k__Bacteria; p__Bacteroidetes; c__Bacteroidia; o__Bacteroidales; f__Muribaculaceae; g__uncultured bacterium; s__uncultured bacterium
OTU_509	0	8	0	0	0	1	0	0	0	0	0	0	0	0	0	2	16	2	0	0	0	0	0	0	0	0	0	0	0	0	k__Bacteria; p__Bacteroidetes; c__Bacteroidia; o__Bacteroidales; f__Muribaculaceae
OTU_1236	0	2	3	3	1	0	4	0	0	2	3	3	4	0	0	0	1	2	3	0	0	1	0	0	0	10	0	0	0	2	k__Bacteria; p__Bacteroidetes; c__Bacteroidia; o__Bacteroidales; f__Muribaculaceae
OTU_149	0	6	77	65	2	0	0	3	2	2	5	39	4	14	0	3	15	13	0	0	0	0	0	0	0	10	0	8	18	0	k__Bacteria; p__Proteobacteria; c__Alphaproteobacteria; o__Rhodospirillales; f__uncultured; g__gut metagenome; s__gut metagenome
OTU_1227	0	2	1	0	0	0	0	0	0	0	0	0	0	0	0	0	0	0	0	0	0	0	0	3	0	0	2	0	3	0	k__Bacteria; p__Bacteroidetes; c__Bacteroidia; o__Bacteroidales; f__Muribaculaceae; g__uncultured bacterium; s__uncultured bacterium
OTU_260	0	16	0	0	0	0	1	1	4	0	0	0	0	0	0	0	0	0	0	0	0	0	0	0	0	0	0	0	0	0	k__Bacteria; p__Bacteroidetes; c__Bacteroidia; o__Bacteroidales
OTU_727	0	7	0	0	0	0	0	0	0	0	0	0	0	0	0	0	1	0	0	0	0	0	0	0	0	0	0	0	0	1	k__Bacteria; p__Bacteroidetes; c__Bacteroidia; o__Bacteroidales; f__Muribaculaceae; g__uncultured bacterium; s__uncultured bacterium
OTU_337	0	4	0	0	0	0	0	0	0	0	0	0	0	1	3	0	2	2	2	1	0	0	0	0	0	0	0	1	0	0	k__Bacteria; p__Bacteroidetes; c__Bacteroidia; o__Bacteroidales; f__Prevotellaceae; g__Alloprevotella; s__uncultured Bacteroidales bacterium
OTU_1232	0	4	7	25	1	0	0	4	6	7	22	22	0	0	0	1	4	4	2	3	7	9	4	6	1	7	0	4	7	2	k__Bacteria; p__Bacteroidetes; c__Bacteroidia; o__Bacteroidales; f__Muribaculaceae; g__uncultured bacterium; s__uncultured bacterium
OTU_488	0	2	0	0	0	0	1	0	0	0	0	0	0	0	0	0	0	0	0	0	0	0	0	0	0	0	0	0	0	0	k__Bacteria; p__Firmicutes; c__Clostridia; o__Clostridiales; f__Family XI
OTU_548	0	5	0	0	0	0	0	0	1	1	0	0	0	0	0	0	0	0	0	0	0	0	0	0	0	0	0	0	0	0	k__Bacteria; p__Firmicutes; c__Clostridia; o__Clostridiales; f__Ruminococcaceae; g__Ruminococcaceae UCG-014; s__Clostridiales bacterium canine oral taxon 100
OTU_385	0	6	0	0	0	2	0	0	1	0	0	0	0	0	0	0	0	0	0	0	0	0	0	0	0	0	0	0	0	0	k__Bacteria; p__Proteobacteria; c__Alphaproteobacteria; o__Rhizobiales; f__Rhizobiaceae; g__Allorhizobium-Neorhizobium-Pararhizobium-Rhizobium
OTU_146	0	1	0	1	0	2	1	0	9	0	7	0	11	0	4	0	6	0	1	0	0	1	0	0	5	33	91	1	19	10	k__Bacteria; p__Actinobacteria; c__Actinobacteria; o__Bifidobacteriales; f__Bifidobacteriaceae; g__Bifidobacterium; s__Bifidobacterium longum subsp. longum
OTU_683	0	2	0	4	0	0	0	0	0	0	0	0	0	0	0	0	9	1	0	0	0	0	0	0	0	1	0	0	0	2	k__Bacteria; p__Bacteroidetes; c__Bacteroidia; o__Bacteroidales; f__Muribaculaceae; g__uncultured bacterium; s__uncultured bacterium
OTU_1235	0	11	0	1	0	0	0	0	0	0	0	0	0	0	0	2	5	3	0	0	0	0	0	0	0	0	0	0	0	1	k__Bacteria; p__Bacteroidetes; c__Bacteroidia; o__Bacteroidales
OTU_527	0	1	1	3	2	3	1	9	0	2	0	0	0	6	0	9	0	3	0	13	1	2	0	9	9	7	8	0	1	3	k__Bacteria; p__Bacteroidetes; c__Bacteroidia; o__Bacteroidales; f__Muribaculaceae
OTU_1027	0	1	0	0	0	0	0	1	1	0	0	0	0	0	0	0	0	0	0	0	0	0	0	0	0	0	0	0	0	0	k__Bacteria; p__Firmicutes; c__Erysipelotrichia; o__Erysipelotrichales; f__Erysipelotrichaceae; g__uncultured
OTU_383	0	3	0	0	0	0	0	3	2	0	0	0	0	0	0	0	0	0	0	0	0	0	0	0	0	0	0	0	0	0	k__Bacteria; p__Epsilonbacteraeota; c__Campylobacteria; o__Campylobacterales; f__Campylobacteraceae; g__Campylobacter; s__Campylobacter mucosalis
OTU_626	0	2	0	1	0	0	0	0	1	0	0	0	1	0	0	0	2	0	0	0	0	2	0	0	0	1	0	0	0	0	k__Bacteria; p__Bacteroidetes; c__Bacteroidia; o__Bacteroidales; f__Muribaculaceae; g__uncultured bacterium; s__uncultured bacterium
OTU_787	0	1	0	0	0	0	3	0	0	0	0	0	0	0	0	0	0	0	0	1	0	0	0	0	0	2	0	0	0	0	k__Bacteria; p__Bacteroidetes; c__Bacteroidia; o__Bacteroidales; f__Muribaculaceae; g__uncultured bacterium; s__uncultured bacterium
OTU_43	0	1	0	0	0	2	20	62	262	201	164	114	3138	8	0	35	0	0	1	0	11	5	16	148	3	459	4	32	17	176	k__Bacteria; p__Firmicutes; c__Clostridia; o__Clostridiales; f__Lachnospiraceae; g__Eisenbergiella; s__uncultured bacterium
OTU_318	0	6	0	0	0	0	0	2	1	1	0	0	0	0	0	0	0	0	0	0	0	0	0	0	0	0	0	0	0	0	k__Bacteria; p__Firmicutes; c__Clostridia; o__Clostridiales; f__Peptostreptococcaceae; g__Peptostreptococcus; s__uncultured bacterium
OTU_713	0	1	12	7	0	4	21	28	7	17	6	15	55	1	0	26	4	34	32	65	6	6	7	7	19	11	35	3	8	65	k__Bacteria; p__Bacteroidetes; c__Bacteroidia; o__Bacteroidales; f__Muribaculaceae; g__uncultured bacterium; s__uncultured bacterium
OTU_87	0	1	0	0	0	220	78	68	24	27	0	0	0	13	0	1	2	15	5	2	3	11	16	14	11	36	36	69	84	30	k__Bacteria; p__Firmicutes; c__Clostridia; o__Clostridiales; f__Ruminococcaceae; g__Ruminococcaceae UCG-010; s__uncultured organism
OTU_971	0	2	0	0	0	0	0	0	0	0	0	0	0	0	0	0	0	0	0	0	0	0	0	0	0	0	0	0	0	0	k__Bacteria; p__Gemmatimonadetes; c__Longimicrobia; o__Longimicrobiales; f__Longimicrobiaceae; g__uncultured bacterium; s__uncultured bacterium
OTU_158	0	3	12	1	0	1	0	2	0	7	1	9	36	0	0	11	0	1	3	11	0	4	0	0	6	18	1	3	8	3	k__Bacteria; p__Firmicutes; c__Erysipelotrichia; o__Erysipelotrichales; f__Erysipelotrichaceae; g__Candidatus Stoquefichus; s__uncultured bacterium
OTU_973	0	2	0	0	0	1	0	0	0	0	0	0	0	0	0	0	0	0	0	0	0	0	0	0	0	0	0	0	0	0	k__Bacteria; p__Gemmatimonadetes; c__Gemmatimonadetes; o__Gemmatimonadales; f__Gemmatimonadaceae; g__Gemmatirosa
OTU_80	0	1	0	0	4	325	166	168	170	97	107	41	142	228	0	0	15	27	0	0	23	9	64	190	177	0	10	130	15	0	k__Bacteria; p__Firmicutes; c__Clostridia; o__Clostridiales; f__Ruminococcaceae; g__Ruminiclostridium 9; s__uncultured bacterium
OTU_88	0	2	17	1	0	65	31	85	102	78	96	47	166	209	15	8	1	4	4	4	3	18	29	38	62	26	18	117	16	11	k__Bacteria; p__Firmicutes; c__Clostridia; o__Clostridiales; f__Peptococcaceae; g__uncultured; s__uncultured bacterium
OTU_116	0	7	0	0	0	0	0	0	0	0	40	106	170	105	11	0	0	0	0	0	85	23	10	0	0	0	10	102	79	0	k__Bacteria; p__Bacteroidetes; c__Bacteroidia; o__Bacteroidales; f__Rikenellaceae; g__Rikenellaceae RC9 gut group; s__uncultured bacterium
OTU_985	0	2	0	0	0	0	0	0	1	0	0	0	0	0	0	0	0	0	0	0	0	0	0	0	0	0	0	0	0	0	k__Bacteria; p__Actinobacteria; c__Coriobacteriia; o__Coriobacteriales; f__Atopobiaceae; g__Atopobium
OTU_1121	0	2	0	0	0	0	0	0	0	0	0	0	0	0	0	0	0	0	0	0	0	0	0	0	0	0	0	0	0	0	k__Bacteria; p__Bacteroidetes; c__Bacteroidia; o__Bacteroidales; f__Rikenellaceae
OTU_998	0	1	0	1	0	0	0	0	0	1	3	0	0	0	0	1	1	0	0	0	0	1	2	1	0	0	0	0	0	0	k__Bacteria; p__Bacteroidetes; c__Bacteroidia; o__Bacteroidales; f__Muribaculaceae; g__uncultured bacterium; s__uncultured bacterium
OTU_37	0	4	3	7	2	77	365	487	700	370	135	55	1118	462	0	10	15	2	2	8	37	13	50	74	157	373	25	319	29	118	k__Bacteria; p__Firmicutes; c__Clostridia; o__Clostridiales; f__Ruminococcaceae; g__Oscillibacter; s__unidentified
OTU_1239	0	1	0	0	0	75	88	0	0	0	0	0	7	1	0	0	0	0	0	0	0	0	0	0	0	1	0	0	0	0	k__Bacteria; p__Firmicutes; c__Clostridia; o__Clostridiales; f__Ruminococcaceae
OTU_163	0	3	1	0	0	1	1	17	3	2	3	4	1	1	1	11	41	0	35	1	9	2	0	2	1	0	5	9	4	1	k__Bacteria; p__Firmicutes; c__Clostridia; o__Clostridiales; f__Lachnospiraceae; g__Blautia; s__uncultured organism
OTU_433	0	2	0	0	0	0	1	3	2	0	0	0	0	0	0	0	0	0	0	0	0	0	0	0	0	0	0	0	0	0	k__Bacteria; p__Firmicutes; c__Erysipelotrichia; o__Erysipelotrichales; f__Erysipelotrichaceae; g__Dielma; s__uncultured bacterium
OTU_831	0	3	0	1	2	0	0	0	0	4	0	3	0	0	0	0	12	1	0	0	0	2	3	3	0	2	0	1	2	2	k__Bacteria; p__Bacteroidetes; c__Bacteroidia; o__Bacteroidales; f__Muribaculaceae; g__uncultured bacterium; s__uncultured bacterium
OTU_142	0	1	0	0	0	11	3	32	53	33	13	7	82	29	0	1	2	0	3	3	15	4	6	9	23	24	13	50	3	20	k__Bacteria; p__Firmicutes; c__Clostridia; o__Clostridiales; f__Ruminococcaceae
OTU_650	0	2	0	0	0	0	0	0	0	0	0	0	0	0	0	0	0	0	0	0	0	0	0	1	0	0	0	0	0	0	k__Bacteria; p__Bacteroidetes; c__Bacteroidia; o__Bacteroidales; f__Muribaculaceae; g__uncultured bacterium; s__uncultured bacterium
OTU_549	0	6	17	20	3	0	0	0	0	0	0	0	5	0	0	1	67	2	0	0	1	5	1	0	1	10	0	1	1	2	k__Bacteria; p__Bacteroidetes; c__Bacteroidia; o__Bacteroidales
OTU_1012	0	2	0	0	0	3	0	0	0	0	0	0	0	0	0	0	0	0	0	0	0	0	0	0	0	0	0	0	0	0	k__Bacteria; p__Actinobacteria; c__Actinobacteria; o__Pseudonocardiales; f__Pseudonocardiaceae; g__Pseudonocardia
OTU_734	0	2	3	0	0	2	0	0	0	0	0	0	2	0	0	0	0	0	0	0	0	0	0	0	0	0	0	0	0	0	k__Bacteria; p__Proteobacteria; c__Alphaproteobacteria; o__Rhizobiales; f__Beijerinckiaceae; g__Microvirga; s__uncultured bacterium
OTU_228	0	1	0	0	0	0	8	0	0	0	0	0	0	1	0	0	0	2	0	0	0	0	0	0	0	0	0	71	0	0	k__Bacteria; p__Firmicutes; c__Clostridia; o__Clostridiales; f__Lachnospiraceae; g__Lachnospiraceae NK4A136 group; s__uncultured bacterium
OTU_73	0	1	0	0	0	467	606	2	77	48	0	0	0	200	0	0	0	0	0	0	12	3	13	35	13	0	9	140	62	47	k__Bacteria; p__Firmicutes; c__Clostridia; o__Clostridiales; f__Lachnospiraceae; g__uncultured; s__uncultured bacterium
OTU_1120	0	2	0	0	0	0	0	0	0	0	0	0	0	0	0	0	0	0	0	0	0	0	0	0	0	0	0	0	0	0	k__Bacteria; p__Firmicutes; c__Clostridia; o__Clostridiales; f__Family XI; g__Peptoniphilus
OTU_133	0	8	0	5	0	11	22	7	11	25	4	10	16	67	0	0	11	13	3	1	9	13	14	16	5	0	1	5	3	0	k__Bacteria; p__Firmicutes; c__Clostridia; o__Clostridiales; f__Ruminococcaceae; g__uncultured; s__uncultured bacterium
OTU_1217	0	1	0	0	0	1	0	0	0	0	0	0	0	0	0	0	0	0	0	0	1	0	0	0	0	0	0	1	0	0	k__Bacteria; p__Bacteroidetes; c__Bacteroidia; o__Bacteroidales; f__Muribaculaceae; g__uncultured bacterium; s__uncultured bacterium
OTU_835	0	2	0	0	0	0	0	0	0	0	0	0	0	0	0	1	0	0	0	0	0	0	0	8	1	0	0	0	1	0	k__Bacteria; p__Bacteroidetes; c__Bacteroidia; o__Bacteroidales; f__Muribaculaceae; g__uncultured bacterium; s__uncultured bacterium
OTU_132	0	2	7	24	24	0	0	0	0	0	7	13	6	0	44	22	4	0	8	18	2	8	1	8	4	16	4	2	2	4	k__Bacteria; p__Firmicutes; c__Erysipelotrichia; o__Erysipelotrichales; f__Erysipelotrichaceae; g__Holdemania; s__Holdemania massiliensis AP2
OTU_71	0	3	0	0	0	24	9	208	193	73	22	13	82	9	0	80	3	48	13	9	21	23	35	17	11	58	61	166	41	77	k__Bacteria; p__Actinobacteria; c__Coriobacteriia; o__Coriobacteriales; f__Eggerthellaceae; g__Enterorhabdus; s__uncultured bacterium
OTU_1336	0	2	0	0	0	0	0	0	0	0	0	0	0	0	0	0	0	0	0	0	0	0	0	0	0	0	0	0	0	0	k__Bacteria; p__Actinobacteria; c__MB-A2-108
OTU_1322	0	2	0	0	0	0	0	0	0	0	0	0	0	0	0	0	0	0	0	0	0	0	0	0	0	0	0	0	0	0	k__Bacteria; p__Bacteroidetes; c__Bacteroidia; o__Bacteroidales; f__Rikenellaceae; g__Rikenellaceae RC9 gut group; s__uncultured bacterium
OTU_463	0	1	0	0	0	0	0	0	0	1	0	0	0	1	0	4	0	0	0	0	0	0	0	0	0	0	1	0	0	0	k__Bacteria; p__Bacteroidetes; c__Bacteroidia; o__Bacteroidales; f__Bacteroidaceae; g__Bacteroides
OTU_754	0	1	0	0	0	2	0	0	0	0	0	0	0	0	0	0	0	0	0	0	0	0	0	0	0	0	0	1	0	0	k__Bacteria; p__Proteobacteria; c__Gammaproteobacteria; o__Betaproteobacteriales; f__Burkholderiaceae
OTU_39	0	1	1	0	3	310	520	516	210	64	249	232	141	296	0	0	6	18	350	1191	154	52	326	1	2	0	10	184	95	0	k__Bacteria; p__Firmicutes; c__Clostridia; o__Clostridiales; f__Ruminococcaceae
OTU_205	0	2	0	0	0	0	2	0	1	6	0	0	0	0	0	0	0	13	9	4	0	1	1	3	0	22	7	3	8	0	k__Bacteria; p__Firmicutes; c__Clostridia; o__Clostridiales; f__Ruminococcaceae; g__Candidatus Soleaferrea; s__Bittarella massiliensis
OTU_878	0	1	0	3	0	0	1	1	1	1	0	0	0	0	0	3	18	4	0	0	3	17	13	0	0	2	3	0	2	0	k__Bacteria; p__Bacteroidetes; c__Bacteroidia; o__Bacteroidales; f__Muribaculaceae; g__uncultured bacterium; s__uncultured bacterium
OTU_137	0	3	0	0	1	3	1	1	0	1	11	39	209	3	1	13	0	0	0	0	11	10	9	0	0	0	0	1	3	3	k__Bacteria; p__Firmicutes; c__Clostridia; o__Clostridiales; f__Lachnospiraceae; g__Lachnospiraceae NK4A136 group
OTU_417	0	2	0	6	0	6	0	2	1	0	0	0	3	1	0	0	0	0	0	0	0	0	0	0	0	0	0	0	0	0	k__Bacteria; p__Actinobacteria; c__Actinobacteria; o__Micromonosporales; f__Micromonosporaceae
OTU_542	0	2	0	0	0	0	0	0	0	1	0	0	0	0	0	0	0	0	0	0	0	0	0	0	0	0	0	0	0	0	k__Bacteria; p__Patescibacteria; c__Saccharimonadia; o__Saccharimonadales; f__uncultured bacterium; g__uncultured bacterium; s__uncultured bacterium
OTU_485	0	1	4	2	0	7	0	13	3	0	10	0	1	0	0	0	0	4	3	1	0	0	0	2	0	0	0	1	0	0	k__Bacteria; p__Firmicutes; c__Clostridia; o__Clostridiales; f__Lachnospiraceae; g__Blautia
OTU_83	0	2	0	0	0	79	130	565	468	288	14	14	76	71	0	0	0	0	0	1	6	5	17	0	0	0	20	331	83	30	k__Bacteria; p__Firmicutes; c__Clostridia; o__Clostridiales; f__Ruminococcaceae
OTU_156	0	1	0	2	0	2	2	0	24	3	31	0	15	0	5	0	10	0	6	14	1	0	1	1	23	6	5	19	6	25	k__Bacteria; p__Actinobacteria; c__Actinobacteria; o__Bifidobacteriales; f__Bifidobacteriaceae; g__Bifidobacterium; s__unidentified
OTU_923	0	1	0	0	0	0	0	0	0	0	0	0	0	0	0	0	3	0	0	0	0	0	0	0	0	0	0	0	0	0	k__Bacteria
OTU_644	0	2	0	0	0	0	0	0	0	0	0	0	0	0	0	0	1	0	0	0	0	0	0	0	0	0	0	0	0	0	k__Bacteria; p__Bacteroidetes; c__Bacteroidia; o__Bacteroidales; f__Muribaculaceae; g__uncultured bacterium; s__uncultured bacterium
OTU_986	0	2	0	0	0	0	0	0	0	0	0	0	0	0	0	0	0	0	0	0	0	0	0	0	0	0	0	0	0	0	k__Bacteria; p__Bacteroidetes; c__Bacteroidia; o__Bacteroidales; f__Muribaculaceae; g__uncultured bacterium; s__uncultured bacterium
OTU_500	0	1	1	1	0	2	1	1	1	2	0	0	5	0	0	0	0	0	0	2	1	2	0	0	0	0	1	1	0	0	k__Bacteria; p__Firmicutes; c__Clostridia; o__Clostridiales; f__Lachnospiraceae; g__Fusicatenibacter
OTU_645	0	2	0	0	0	0	0	0	0	0	0	0	0	0	0	0	0	0	0	0	0	0	0	0	0	0	0	0	0	0	k__Bacteria; p__Bacteroidetes; c__Bacteroidia; o__Bacteroidales; f__Muribaculaceae; g__uncultured bacterium; s__uncultured bacterium
OTU_987	0	1	1	2	0	0	0	0	0	0	0	0	0	0	0	0	0	0	0	0	0	0	0	0	0	0	0	0	0	0	k__Bacteria; p__Verrucomicrobia; c__Verrucomicrobiae; o__Verrucomicrobiales; f__Akkermansiaceae; g__Akkermansia; s__uncultured bacterium
OTU_1340	0	1	0	0	1	0	1	0	0	0	0	0	0	0	0	0	0	0	0	0	0	0	0	0	0	0	3	16	2	0	k__Bacteria; p__Firmicutes; c__Clostridia; o__Clostridiales; f__Ruminococcaceae; g__Oscillibacter; s__uncultured bacterium
OTU_530	0	1	1	0	0	0	0	0	0	0	0	0	2	0	0	0	0	0	0	0	0	0	0	0	0	0	0	0	0	0	k__Bacteria; p__Actinobacteria; c__Rubrobacteria; o__Rubrobacterales; f__Rubrobacteriaceae; g__Rubrobacter; s__uncultured bacterium
OTU_640	0	2	0	0	0	1	0	0	0	0	0	0	0	0	0	0	0	0	0	0	0	0	0	0	0	0	0	0	0	0	k__Bacteria; p__Proteobacteria; c__Alphaproteobacteria; o__Sphingomonadales; f__Sphingomonadaceae; g__Altererythrobacter; s__Porphyrobacter mercurialis
OTU_351	0	1	3	7	0	18	14	4	6	4	9	6	26	2	1	0	2	0	1	4	5	5	0	8	22	0	0	9	1	28	k__Bacteria; p__Firmicutes; c__Clostridia; o__Clostridiales; f__Ruminococcaceae
OTU_20	0	1	0	0	0	379	180	965	295	79	1	0	0	100	1	1	0	78	0	1	2	3	663	0	1	0	9	5662	14	642	k__Bacteria; p__Firmicutes; c__Clostridia; o__Clostridiales; f__Ruminococcaceae; g__Ruminococcaceae UCG-014; s__uncultured bacterium
OTU_651	0	2	0	0	0	0	0	0	0	0	0	0	0	0	0	0	0	0	0	0	0	0	0	0	0	0	0	0	0	0	k__Bacteria; p__Actinobacteria; c__Actinobacteria; o__Corynebacteriales; f__Corynebacteriaceae; g__Corynebacterium 1; s__Corynebacterium casei
OTU_796	0	1	0	0	0	0	1	0	0	0	0	0	0	0	0	3	2	1	1	0	0	0	0	0	0	0	0	0	0	0	k__Bacteria; p__Bacteroidetes; c__Bacteroidia; o__Bacteroidales; f__Muribaculaceae; g__uncultured bacterium; s__uncultured bacterium
OTU_1009	0	1	2	5	0	0	0	0	0	0	2	1	2	0	0	0	1	0	0	0	0	0	0	0	0	0	0	0	1	0	k__Bacteria
OTU_1085	0	2	0	0	0	0	0	0	0	0	0	0	0	0	0	0	0	0	0	0	0	0	0	0	0	0	0	0	0	0	k__Bacteria
OTU_877	0	2	0	0	0	0	0	0	0	0	0	0	0	0	0	0	6	0	1	0	0	0	0	0	0	0	0	0	0	0	k__Bacteria; p__Bacteroidetes; c__Bacteroidia; o__Bacteroidales; f__Muribaculaceae; g__uncultured bacterium; s__uncultured bacterium
OTU_1310	0	1	0	2	2	0	3	0	0	0	0	0	1	2	0	0	0	0	0	0	0	0	0	2	0	2	0	0	0	0	k__Bacteria; p__Bacteroidetes; c__Bacteroidia; o__Bacteroidales; f__Muribaculaceae; g__uncultured bacterium; s__uncultured bacterium
OTU_298	0	1	0	0	0	0	7	0	12	0	1	0	0	0	0	1	4	1	0	3	0	1	0	0	0	1	0	0	3	0	k__Bacteria; p__Firmicutes; c__Bacilli; o__Lactobacillales; f__Lactobacillaceae; g__Lactobacillus
OTU_1311	0	1	0	3	0	0	0	0	0	0	0	0	0	0	0	0	0	0	0	0	0	0	0	0	0	0	0	0	0	0	k__Bacteria
OTU_1210	0	3	0	0	0	0	0	20	37	5	0	1	1	0	0	1	0	2	0	3	22	0	2	0	0	14	0	1	4	2	k__Bacteria; p__Firmicutes; c__Clostridia; o__Clostridiales; f__Lachnospiraceae
OTU_557	0	1	0	0	0	0	1	0	0	2	0	0	0	0	0	0	0	0	0	0	0	0	0	0	0	0	0	0	0	0	k__Bacteria; p__Firmicutes; c__Clostridia; o__Clostridiales; f__Lachnospiraceae; g__Lachnospiraceae NK3A20 group
OTU_1189	0	1	0	0	0	0	0	0	0	1	0	0	0	1	0	0	0	1	0	0	0	0	0	0	0	0	1	0	0	0	k__Bacteria; p__Proteobacteria; c__Alphaproteobacteria; o__Rhizobiales; f__Rhizobiaceae; g__Ochrobactrum; s__uncultured bacterium
OTU_499	0	2	2	0	3	0	0	0	0	0	0	0	0	0	0	0	0	0	0	0	0	0	0	0	0	0	0	0	0	0	k__Bacteria; p__Bacteroidetes; c__Bacteroidia; o__Bacteroidales; f__Muribaculaceae; g__uncultured bacterium; s__uncultured bacterium
OTU_439	0	1	0	0	0	0	0	2	5	0	0	0	0	0	0	0	0	0	0	0	0	0	0	0	0	0	0	0	0	0	k__Bacteria; p__Firmicutes; c__Bacilli; o__Lactobacillales; f__Streptococcaceae; g__Streptococcus
OTU_1002	0	2	0	0	0	0	0	1	1	0	4	0	2	0	0	1	0	1	3	2	0	1	1	0	0	0	0	0	0	1	k__Bacteria; p__Firmicutes; c__Erysipelotrichia; o__Erysipelotrichales; f__Erysipelotrichaceae; g__Ileibacterium; s__Erysipelotrichaceae bacterium NYU-BL-F16
OTU_815	0	1	0	0	0	0	4	0	0	3	0	0	1	1	0	0	0	0	3	1	0	0	2	1	0	5	0	0	0	0	k__Bacteria
OTU_1086	0	1	0	1	0	0	0	0	0	0	0	0	0	0	0	0	0	0	0	0	0	0	0	0	0	0	0	0	0	0	k__Bacteria; p__Bacteroidetes; c__Bacteroidia; o__Flavobacteriales; f__Flavobacteriaceae; g__Flavobacterium
OTU_246	0	2	8	3	0	6	5	0	0	0	0	0	0	0	0	0	0	0	0	0	7	0	0	0	0	0	0	0	0	0	k__Bacteria; p__Firmicutes; c__Clostridia; o__Clostridiales; f__Clostridiales vadinBB60 group; g__uncultured bacterium; s__uncultured bacterium
OTU_45	0	1	0	0	0	12	85	307	580	549	451	99	82	372	2	17	0	7	0	0	8	22	41	112	536	102	102	50	10	200	k__Bacteria; p__Firmicutes; c__Clostridia; o__Clostridiales; f__Ruminococcaceae; g__Ruminiclostridium; s__uncultured bacterium
OTU_167	0	1	0	0	0	28	4	33	181	98	0	3	0	1	0	2	0	30	1	6	0	3	0	3	0	1	1	77	2	0	k__Bacteria; p__Firmicutes; c__Clostridia; o__Clostridiales; f__Lachnospiraceae; g__Roseburia; s__uncultured organism
OTU_5	0	0	1689	899	85	3001	1093	2620	3769	5182	241	2235	2134	784	1	3587	19	4283	346	855	1069	655	1454	545	895	633	2264	658	2572	531	k__Bacteria; p__Bacteroidetes; c__Bacteroidia; o__Bacteroidales; f__Tannerellaceae; g__Parabacteroides; s__uncultured bacterium
OTU_255	0	0	6	3	0	18	12	17	9	36	3	1	0	0	0	0	0	0	0	0	2	3	5	10	32	16	3	27	2	78	k__Bacteria; p__Firmicutes; c__Clostridia; o__Clostridiales; f__Ruminococcaceae
OTU_790	0	0	1	0	1	0	0	0	0	0	0	0	0	0	0	0	2	0	0	0	1	2	1	0	0	0	0	0	0	0	k__Bacteria; p__Bacteroidetes; c__Bacteroidia; o__Bacteroidales; f__Muribaculaceae; g__uncultured bacterium; s__uncultured bacterium
OTU_441	0	0	11	13	0	1	0	0	0	0	0	0	0	0	0	0	0	0	0	0	0	0	0	0	0	0	0	0	0	0	k__Bacteria; p__Proteobacteria; c__Gammaproteobacteria; o__Betaproteobacteriales; f__Hydrogenophilaceae; g__Thiobacillus
OTU_110	0	0	32	15	4	3	0	2	4	2	4	6	7	0	0	15	36	0	58	56	2	1	3	0	11	167	1	16	3	2	k__Bacteria; p__Firmicutes; c__Clostridia; o__Clostridiales; f__Ruminococcaceae; g__Negativibacillus; s__uncultured bacterium
OTU_430	0	0	7	0	0	0	0	0	0	0	0	0	0	0	0	0	0	0	0	0	0	0	0	0	0	0	0	0	0	0	k__Bacteria; p__Firmicutes; c__Bacilli; o__Bacillales; f__Bacillaceae; g__Bacillus
OTU_1162	0	0	72	25	34	15	9	69	47	96	2	33	48	34	0	18	0	51	12	54	49	14	33	16	15	8	51	5	56	9	k__Bacteria; p__Bacteroidetes; c__Bacteroidia; o__Bacteroidales
OTU_153	0	0	42	19	3	12	8	16	64	22	4	1	1	0	1	20	13	5	9	5	5	3	2	1	6	6	10	20	9	4	k__Bacteria; p__Firmicutes; c__Bacilli; o__Lactobacillales; f__Lactobacillaceae; g__Lactobacillus; s__Lactobacillus reuteri
OTU_1059	0	0	18	12	2	11	22	41	10	26	0	0	0	16	0	61	0	7	3	10	11	4	25	72	54	18	41	3	50	6	k__Bacteria; p__Bacteroidetes; c__Bacteroidia; o__Bacteroidales
OTU_270	0	0	8	0	0	1	0	0	0	2	0	0	0	0	0	0	1	0	1	5	9	0	0	1	0	10	2	50	1	25	k__Bacteria; p__Firmicutes; c__Bacilli; o__Lactobacillales; f__Streptococcaceae; g__Streptococcus
OTU_1125	0	0	42	25	3	11	20	36	33	69	10	35	60	8	0	22	0	72	4	7	31	9	41	6	20	24	51	3	30	23	k__Bacteria; p__Bacteroidetes; c__Bacteroidia; o__Bacteroidales
OTU_1170	0	0	1	0	0	0	0	1	0	0	0	1	0	0	0	0	0	2	0	0	0	0	1	0	1	0	0	0	0	1	k__Bacteria; p__Bacteroidetes; c__Bacteroidia; o__Bacteroidales; f__Muribaculaceae
OTU_1248	0	0	6	1	3	6	7	0	8	0	0	0	0	0	0	0	0	1	1	0	0	0	2	0	0	5	0	0	0	1	k__Bacteria; p__Bacteroidetes; c__Bacteroidia; o__Bacteroidales
OTU_800	0	0	2	1	0	0	3	0	1	1	0	1	0	0	0	1	0	6	0	0	0	0	0	0	0	1	1	0	1	0	k__Bacteria; p__Bacteroidetes; c__Bacteroidia; o__Bacteroidales; f__Tannerellaceae; g__Parabacteroides
OTU_469	0	0	13	0	0	0	0	0	0	1	0	0	0	0	0	2	0	2	0	0	0	4	4	0	0	0	0	0	0	0	k__Bacteria; p__Bacteroidetes; c__Bacteroidia; o__Bacteroidales
OTU_555	0	0	2	0	0	0	0	0	0	0	0	0	1	0	0	0	0	0	0	0	0	0	1	0	0	0	0	0	0	0	k__Bacteria; p__Firmicutes; c__Bacilli; o__Lactobacillales; f__Streptococcaceae; g__Lactococcus; s__Lactococcus lactis
OTU_870	0	0	1	8	1	1	0	0	0	0	27	8	5	0	0	3	2	34	12	4	18	2	20	0	0	9	0	0	3	2	k__Bacteria; p__Firmicutes; c__Erysipelotrichia; o__Erysipelotrichales; f__Erysipelotrichaceae; g__Ileibacterium; s__Erysipelotrichaceae bacterium NYU-BL-F16
OTU_602	0	0	5	3	1	2	9	20	5	14	8	7	2	0	0	5	1	0	0	0	0	0	3	12	6	0	5	4	10	0	k__Bacteria; p__Bacteroidetes; c__Bacteroidia; o__Bacteroidales
OTU_649	0	0	2	0	0	0	0	0	0	0	0	0	0	0	0	0	0	0	0	0	0	0	0	0	0	0	0	0	0	0	k__Bacteria; p__Bacteroidetes; c__Bacteroidia; o__Bacteroidales
OTU_817	0	0	4	1	1	0	2	0	0	1	0	0	0	3	0	10	11	5	0	0	1	2	4	0	0	0	0	0	0	4	k__Bacteria; p__Bacteroidetes; c__Bacteroidia; o__Bacteroidales; f__Muribaculaceae
OTU_607	0	0	3	0	0	19	34	2	11	1	0	0	1	14	0	0	0	1	3	16	2	2	8	0	0	3	0	0	0	6	k__Bacteria; p__Bacteroidetes; c__Bacteroidia; o__Bacteroidales; f__Muribaculaceae
OTU_1126	0	0	2	2	0	0	5	1	1	1	0	3	0	1	0	3	0	6	3	2	1	4	3	1	3	0	0	0	5	5	k__Bacteria; p__Bacteroidetes; c__Bacteroidia; o__Bacteroidales
OTU_399	0	0	13	21	0	1	2	1	6	4	0	4	0	0	0	5	0	6	0	2	2	3	1	1	0	1	2	0	2	0	k__Bacteria; p__Bacteroidetes; c__Bacteroidia; o__Bacteroidales; f__Tannerellaceae; g__Parabacteroides
OTU_1071	0	0	1	5	5	0	0	0	0	0	1	0	1	0	0	0	0	4	1	3	0	0	0	0	0	1	1	0	0	1	k__Bacteria
OTU_992	0	0	2	1	0	0	0	0	0	0	0	0	0	0	0	0	0	0	0	0	0	0	0	0	0	0	0	0	0	0	k__Bacteria; p__Chloroflexi; c__Chloroflexia; o__Thermomicrobiales; f__JG30-KF-CM45; g__uncultured bacterium; s__uncultured bacterium
OTU_1053	0	0	1	0	0	0	0	0	0	0	0	0	1	0	0	0	0	0	0	0	0	0	0	0	0	2	0	0	2	0	k__Bacteria; p__Bacteroidetes; c__Bacteroidia; o__Bacteroidales; f__Muribaculaceae
OTU_534	0	0	7	0	0	0	0	0	0	0	0	0	0	0	0	0	0	0	0	0	0	0	0	0	0	0	0	0	0	0	k__Bacteria; p__Proteobacteria; c__Gammaproteobacteria; o__Betaproteobacteriales; f__Burkholderiaceae; g__Sphaerotilus; s__uncultured bacterium
OTU_237	0	0	2	0	0	1	0	0	0	0	0	0	0	0	6	0	1	6	0	0	3	0	0	21	0	0	0	0	0	0	k__Bacteria; p__Actinobacteria; c__Coriobacteriia; o__Coriobacteriales; f__Coriobacteriaceae; g__Collinsella; s__uncultured bacterium
OTU_346	0	0	1	0	0	0	0	0	1	0	2	0	0	2	1	0	0	0	0	0	1	2	0	0	0	0	0	0	0	0	k__Bacteria; p__Proteobacteria; c__Alphaproteobacteria; o__Caulobacterales; f__Hyphomonadaceae; g__Oceanicaulis
OTU_238	0	0	3	1	0	0	0	1	0	1	0	22	2	2	3	0	0	0	0	0	9	0	0	0	0	0	0	0	0	0	k__Bacteria; p__Firmicutes; c__Bacilli; o__Bacillales; f__Sporolactobacillaceae; g__Scopulibacillus; s__Scopulibacillus daqui
OTU_249	0	0	4	2	17	1	31	0	0	0	36	37	1	2	0	0	0	0	0	6	0	0	0	0	0	0	0	1	0	1	k__Bacteria; p__Proteobacteria; c__Gammaproteobacteria; o__Pseudomonadales; f__Moraxellaceae; g__Acinetobacter
OTU_1272	0	0	2	1	0	0	0	0	0	0	1	0	4	5	0	3	0	6	0	0	9	1	12	0	0	2	3	0	0	0	k__Bacteria; p__Bacteroidetes; c__Bacteroidia; o__Bacteroidales; f__Muribaculaceae; g__uncultured bacterium; s__uncultured bacterium
OTU_277	0	0	9	0	0	0	0	0	0	0	0	0	0	0	0	1	0	0	0	0	2	0	0	0	1	0	0	0	0	4	k__Bacteria; p__Firmicutes; c__Bacilli; o__Lactobacillales; f__Lactobacillaceae; g__Lactobacillus; s__Lactobacillus salivarius
OTU_349	0	0	1	0	0	0	0	0	3	0	0	0	0	0	0	0	0	0	0	0	0	1	0	1	0	0	1	1	0	1	k__Bacteria; p__Bacteroidetes; c__Bacteroidia; o__Bacteroidales; f__Rikenellaceae; g__Alistipes
OTU_474	0	0	13	0	0	0	0	0	0	0	0	0	0	0	0	0	0	0	0	0	0	0	0	0	0	0	0	0	0	0	k__Bacteria; p__Bacteroidetes; c__Bacteroidia; o__Bacteroidales
OTU_1166	0	0	5	4	0	0	0	0	0	0	0	1	0	0	0	0	1	0	0	0	0	0	0	0	0	0	0	0	0	1	k__Bacteria; p__Bacteroidetes; c__Bacteroidia; o__Bacteroidales; f__Muribaculaceae; g__uncultured bacterium; s__uncultured bacterium
OTU_188	0	0	9	1	3	3	2	0	2	13	1	7	0	1	0	0	3	3	4	4	2	2	0	7	0	3	0	0	1	2	k__Bacteria; p__Cyanobacteria; c__Melainabacteria; o__Gastranaerophilales; f__uncultured bacterium; g__uncultured bacterium; s__uncultured bacterium
OTU_920	0	0	3	0	0	0	0	0	0	0	11	2	6	2	0	0	0	0	0	12	0	0	0	0	0	0	0	0	0	1	k__Bacteria; p__Verrucomicrobia; c__Verrucomicrobiae; o__Verrucomicrobiales; f__Akkermansiaceae; g__Akkermansia; s__unidentified
OTU_1294	0	0	6	5	0	0	0	0	0	0	0	2	3	0	0	0	9	0	0	0	0	1	0	1	0	3	0	0	2	2	k__Bacteria; p__Bacteroidetes; c__Bacteroidia; o__Bacteroidales
OTU_299	0	0	2	0	0	1	3	1	8	0	4	7	1	1	2	0	0	0	5	0	1	0	0	1	2	0	2	2	0	2	k__Bacteria; p__Firmicutes; c__Clostridia; o__Clostridiales; f__Lachnospiraceae; g__[Eubacterium] hallii group; s__uncultured bacterium
OTU_1117	0	0	2	1	0	0	0	0	0	0	0	0	0	0	0	0	0	0	0	0	0	0	0	0	0	0	0	0	0	0	k__Bacteria; p__Planctomycetes; c__OM190
OTU_731	0	0	4	0	0	0	0	0	0	2	2	0	0	0	0	0	0	0	0	0	0	0	0	0	0	0	0	0	0	0	k__Bacteria; p__Firmicutes; c__Clostridia; o__Clostridiales
OTU_993	0	0	2	1	0	0	3	0	0	1	3	0	0	0	0	0	0	1	0	0	0	0	0	0	0	0	0	0	0	0	k__Bacteria; p__Bacteroidetes; c__Bacteroidia; o__Bacteroidales; f__Muribaculaceae; g__uncultured bacterium; s__uncultured bacterium
OTU_558	0	0	5	11	2	0	3	0	0	0	1	0	0	0	0	1	0	0	0	0	0	0	0	0	0	0	0	0	8	0	k__Bacteria; p__Bacteroidetes; c__Bacteroidia; o__Bacteroidales; f__Muribaculaceae; g__uncultured bacterium; s__uncultured bacterium
OTU_1298	0	0	1	0	2	1	1	0	0	0	0	0	0	0	0	0	0	0	0	0	1	0	0	0	0	2	0	0	0	0	k__Bacteria; p__Bacteroidetes; c__Bacteroidia; o__Bacteroidales; f__Muribaculaceae
OTU_716	0	0	2	0	0	0	0	0	0	0	0	0	0	0	0	0	0	0	0	0	0	0	0	0	0	0	0	1	0	0	k__Bacteria; p__Firmicutes; c__Bacilli; o__Lactobacillales; f__Lactobacillaceae; g__Lactobacillus; s__Lactobacillus iners AB-1
OTU_625	0	0	2	0	0	0	0	0	0	0	0	0	0	0	0	0	0	0	0	0	0	0	0	0	0	0	0	0	0	0	k__Bacteria
OTU_324	0	0	1	0	0	0	11	0	2	0	0	0	0	0	0	0	0	0	0	0	1	0	1	0	0	0	0	0	1	10	k__Bacteria; p__Firmicutes; c__Clostridia; o__Clostridiales; f__Lachnospiraceae; g__GCA-900066575; s__uncultured bacterium
OTU_272	0	0	6	3	1	22	21	7	18	10	0	2	2	1	0	7	0	5	0	1	0	1	7	5	6	3	5	0	6	0	k__Bacteria; p__Bacteroidetes; c__Bacteroidia; o__Bacteroidales; f__Tannerellaceae; g__Parabacteroides
OTU_719	0	0	2	0	0	0	0	0	0	0	0	1	0	0	0	1	0	1	0	0	0	0	0	0	0	0	1	0	0	0	k__Bacteria; p__Bacteroidetes; c__Bacteroidia; o__Bacteroidales
OTU_733	0	0	3	0	0	1	0	0	1	0	0	0	2	0	0	0	0	0	0	0	0	0	0	0	0	0	0	0	0	0	k__Bacteria; p__Actinobacteria; c__Rubrobacteria; o__Rubrobacterales; f__Rubrobacteriaceae; g__Rubrobacter
OTU_552	0	0	5	0	0	0	0	0	0	0	0	0	0	0	0	0	0	0	0	0	0	0	0	0	0	0	0	0	0	0	k__Bacteria; p__Proteobacteria; c__Gammaproteobacteria; o__Betaproteobacteriales; f__SC-I-84
OTU_1115	0	0	3	0	0	0	0	0	0	0	0	0	0	0	0	0	0	0	0	0	0	0	0	0	0	0	0	0	0	0	k__Bacteria; p__Bacteroidetes; c__Bacteroidia; o__Bacteroidales; f__Bacteroidaceae; g__Bacteroides; s__uncultured Bacteroides sp.
OTU_1172	0	0	2	0	0	0	0	0	0	0	0	0	0	0	0	0	0	0	0	0	0	0	0	0	0	0	0	0	0	0	k__Bacteria; p__Proteobacteria; c__Gammaproteobacteria
OTU_350	0	0	4	2	3	1	0	0	0	0	1	1	0	0	0	0	0	0	0	1	0	0	0	0	0	0	0	0	0	0	k__Bacteria; p__Firmicutes; c__Clostridia; o__Clostridiales; f__Ruminococcaceae
OTU_199	0	0	1	1	1	3	17	0	0	0	0	0	0	12	0	2	3	0	0	0	0	0	0	3	3	6	0	7	4	0	k__Bacteria; p__Proteobacteria; c__Deltaproteobacteria; o__Desulfovibrionales; f__Desulfovibrionaceae; g__Desulfovibrio
OTU_196	0	0	1	37	3	0	0	0	0	0	0	0	0	0	0	0	0	1	0	0	11	24	42	0	0	0	0	0	0	0	k__Bacteria; p__Bacteroidetes; c__Bacteroidia; o__Bacteroidales; f__Muribaculaceae; g__uncultured bacterium; s__uncultured bacterium
OTU_1243	0	0	3	1	1	0	0	0	1	0	0	0	2	2	0	1	1	2	2	1	1	1	1	0	0	3	0	0	0	0	k__Bacteria; p__Bacteroidetes; c__Bacteroidia; o__Bacteroidales; f__Muribaculaceae; g__uncultured bacterium; s__uncultured bacterium
OTU_569	0	0	1	4	0	1	2	15	0	2	1	0	1	0	0	0	0	9	0	2	0	0	5	0	1	0	0	0	2	0	k__Bacteria
OTU_685	0	0	3	1	1	1	11	38	17	34	1	1	9	2	4	4	0	11	7	9	27	16	16	12	18	1	67	23	64	15	k__Bacteria; p__Bacteroidetes; c__Bacteroidia; o__Bacteroidales; f__Bacteroidaceae; g__Bacteroides
OTU_1253	0	0	3	5	2	0	0	0	0	0	3	7	2	0	0	0	0	1	1	0	1	0	0	0	0	2	0	0	0	0	k__Bacteria; p__Bacteroidetes; c__Bacteroidia; o__Bacteroidales
OTU_1254	0	0	2	0	1	0	0	0	0	0	0	0	0	0	0	1	0	1	0	0	0	1	0	0	0	0	0	0	0	3	k__Bacteria; p__Bacteroidetes; c__Bacteroidia; o__Bacteroidales
OTU_655	0	0	1	0	0	0	12	5	2	4	8	8	11	16	0	3	0	11	6	25	0	5	1	1	4	0	3	0	3	16	k__Bacteria; p__Bacteroidetes; c__Bacteroidia; o__Bacteroidales; f__Muribaculaceae
OTU_898	0	0	2	2	4	0	3	0	3	2	0	0	0	9	1	0	3	1	3	0	0	3	0	4	1	0	2	0	1	3	k__Bacteria; p__Bacteroidetes; c__Bacteroidia; o__Bacteroidales; f__Muribaculaceae; g__uncultured bacterium; s__uncultured bacterium
OTU_771	0	0	1	1	0	0	2	1	0	0	0	0	1	0	0	0	0	0	0	0	0	0	0	0	0	0	0	0	0	0	k__Bacteria; p__Proteobacteria; c__Deltaproteobacteria
OTU_715	0	0	1	1	10	0	5	0	0	0	1	0	0	0	0	0	1	0	1	2	0	0	0	0	1	10	0	0	0	0	k__Bacteria; p__Bacteroidetes; c__Bacteroidia; o__Bacteroidales; f__Muribaculaceae; g__uncultured bacterium; s__uncultured bacterium
OTU_1241	0	0	2	0	0	5	6	0	1	7	3	0	0	0	0	2	0	1	0	0	0	0	1	0	0	0	0	0	0	0	k__Bacteria; p__Bacteroidetes; c__Bacteroidia; o__Bacteroidales; f__Muribaculaceae
OTU_1148	0	0	1	0	0	0	0	0	1	0	0	0	0	0	0	0	0	0	0	0	0	0	0	0	0	0	0	0	0	0	k__Bacteria; p__Actinobacteria; c__Rubrobacteria; o__Rubrobacterales; f__Rubrobacteriaceae; g__Rubrobacter; s__Rubrobacter sp. LYG58
OTU_745	0	0	1	0	0	0	4	0	0	0	0	0	0	0	0	0	0	1	0	1	0	0	0	0	0	0	0	0	0	0	k__Bacteria; p__Bacteroidetes; c__Bacteroidia; o__Bacteroidales
OTU_588	0	0	3	0	0	0	0	0	0	0	0	0	0	0	0	0	0	0	0	0	0	0	0	0	0	0	0	0	0	0	k__Bacteria; p__Chloroflexi; c__Anaerolineae; o__RBG-13-54-9; f__uncultured sludge bacterium A31; g__uncultured sludge bacterium A31; s__uncultured sludge bacterium A31
OTU_958	0	0	3	4	0	0	0	0	0	0	0	0	0	0	0	0	0	0	0	0	0	0	0	0	0	0	0	0	0	0	k__Bacteria; p__Gemmatimonadetes; c__Gemmatimonadetes; o__Gemmatimonadales; f__Gemmatimonadaceae; g__uncultured; s__uncultured soil bacterium
OTU_1303	0	0	3	6	0	0	1	3	6	3	0	0	4	0	0	5	0	4	0	2	0	1	0	0	0	1	12	0	2	10	k__Bacteria; p__Bacteroidetes; c__Bacteroidia; o__Bacteroidales; f__Muribaculaceae; g__uncultured bacterium; s__uncultured bacterium
OTU_362	0	0	1	0	0	1	0	3	0	0	0	0	0	0	0	2	2	0	0	0	0	1	0	0	0	0	1	1	0	0	k__Bacteria; p__Firmicutes; c__Bacilli; o__Lactobacillales; f__Lactobacillaceae; g__Pediococcus; s__Pediococcus pentosaceus
OTU_1188	0	0	1	0	0	1	2	0	0	0	0	0	0	0	0	0	0	0	0	0	0	0	0	0	0	0	0	0	0	0	k__Bacteria; p__Bacteroidetes; c__Bacteroidia; o__Bacteroidales; f__Muribaculaceae
OTU_227	0	0	1	1	0	0	0	1	1	2	0	0	1	0	2	10	6	1	1	0	3	0	1	3	1	0	0	6	2	5	k__Bacteria; p__Firmicutes; c__Bacilli; o__Lactobacillales; f__Leuconostocaceae; g__Weissella; s__Weissella confusa
OTU_960	0	0	3	0	0	0	0	0	0	0	0	0	0	0	0	0	0	0	0	0	0	0	0	0	0	0	0	0	0	0	k__Bacteria; p__Bacteroidetes; c__Bacteroidia; o__Bacteroidales
OTU_540	0	0	1	2	0	0	1	6	0	0	0	0	0	3	0	3	1	0	0	5	2	1	2	26	10	7	0	0	8	0	k__Bacteria; p__Bacteroidetes; c__Bacteroidia; o__Bacteroidales; f__Muribaculaceae; g__uncultured bacterium; s__uncultured bacterium
OTU_180	0	0	2	13	0	0	0	2	0	1	0	0	0	12	0	0	0	0	0	0	9	3	6	9	0	0	0	13	16	0	k__Bacteria; p__Tenericutes; c__Mollicutes; o__Mollicutes RF39; f__uncultured bacterium; g__uncultured bacterium; s__uncultured bacterium
OTU_1216	0	0	1	0	1	0	0	0	0	0	0	0	0	0	0	0	0	2	0	0	0	0	2	0	0	0	0	0	0	0	k__Bacteria; p__Bacteroidetes; c__Bacteroidia; o__Bacteroidales
OTU_1119	0	0	2	0	0	0	20	0	1	3	0	0	0	1	0	0	0	0	0	0	1	0	1	0	0	1	0	0	0	0	k__Bacteria
OTU_751	0	0	1	0	0	0	0	0	0	1	0	0	0	0	0	0	1	2	0	0	0	2	0	4	0	2	7	7	6	0	k__Bacteria; p__Bacteroidetes; c__Bacteroidia; o__Bacteroidales; f__Muribaculaceae; g__uncultured bacterium; s__uncultured bacterium
OTU_183	0	0	1	0	0	27	134	166	314	423	0	0	1	36	0	0	0	0	0	1	1	1	3	149	3	417	4	305	45	2	k__Bacteria; p__Firmicutes; c__Clostridia; o__Clostridiales; f__Lachnospiraceae; g__Lachnospiraceae NK4A136 group
OTU_1208	0	0	2	1	0	3	6	2	3	2	0	0	0	2	0	3	0	0	0	2	0	0	0	0	0	0	0	0	0	0	k__Bacteria; p__Bacteroidetes; c__Bacteroidia; o__Bacteroidales
OTU_267	0	0	1	0	0	0	0	0	0	0	0	0	0	30	0	0	0	0	0	0	0	0	0	0	0	0	0	0	0	0	k__Bacteria; p__Actinobacteria; c__Coriobacteriia; o__Coriobacteriales; f__Eggerthellaceae; g__Enterorhabdus; s__uncultured bacterium
OTU_1118	0	0	2	0	0	0	0	0	0	0	0	0	0	0	0	0	0	0	0	0	0	0	2	0	0	0	0	0	1	0	k__Bacteria
OTU_762	0	0	1	0	0	2	0	0	0	1	0	0	0	0	0	0	0	5	0	0	0	0	0	0	0	1	0	0	0	0	k__Bacteria; p__Bacteroidetes; c__Bacteroidia; o__Bacteroidales
OTU_147	0	0	2	8	0	36	3	21	6	13	0	0	0	10	2	4	0	2	0	0	1	6	4	8	6	8	4	10	1	2	k__Bacteria; p__Firmicutes; c__Clostridia; o__Clostridiales; f__Peptococcaceae; g__uncultured; s__uncultured bacterium
OTU_1191	0	0	1	0	0	1	0	2	0	0	0	0	0	0	0	0	0	0	0	0	0	0	0	0	0	0	0	0	0	0	k__Bacteria; p__Gemmatimonadetes; c__Gemmatimonadetes; o__Gemmatimonadales; f__Gemmatimonadaceae; g__uncultured; s__uncultured Gemmatimonadales bacterium
OTU_1289	0	0	1	1	0	7	2	0	2	1	3	0	0	0	0	0	0	1	0	0	0	0	0	0	0	0	0	0	0	0	k__Bacteria; p__Bacteroidetes; c__Bacteroidia; o__Bacteroidales
OTU_493	0	0	1	0	0	0	1	0	0	0	0	0	0	0	0	0	8	3	0	0	1	2	1	0	0	0	0	0	0	0	k__Bacteria; p__Bacteroidetes; c__Bacteroidia; o__Bacteroidales; f__Muribaculaceae; g__uncultured bacterium; s__uncultured bacterium
OTU_327	0	0	2	3	0	0	0	0	0	0	0	0	0	0	0	0	0	0	0	0	0	0	0	0	0	0	0	1	3	0	k__Bacteria; p__Tenericutes; c__Mollicutes; o__Mollicutes RF39
OTU_1197	0	0	2	0	6	0	0	0	0	0	0	1	0	0	0	0	2	1	0	0	0	0	0	1	1	2	0	0	0	0	k__Bacteria; p__Bacteroidetes; c__Bacteroidia; o__Bacteroidales
OTU_589	0	0	1	0	0	0	0	1	9	8	1	0	3	0	0	1	0	0	0	0	2	0	0	3	5	44	1	41	0	5	k__Bacteria; p__Firmicutes; c__Clostridia; o__Clostridiales; f__Lachnospiraceae; g__Blautia
OTU_1163	0	0	2	0	0	0	0	0	0	0	0	0	0	0	0	0	0	0	0	0	0	0	0	0	0	0	0	0	0	0	k__Bacteria
OTU_438	0	0	1	4	0	0	0	0	0	0	0	0	0	0	0	0	0	0	0	0	0	0	0	0	0	0	0	0	0	0	k__Bacteria; p__Actinobacteria; c__Acidimicrobiia; o__Microtrichales; f__Ilumatobacteraceae; g__CL500-29 marine group; s__metagenome
OTU_391	0	0	1	0	1	0	6	3	7	2	0	0	0	0	0	3	0	4	1	0	2	0	4	0	0	0	2	0	0	0	k__Bacteria; p__Bacteroidetes; c__Bacteroidia; o__Bacteroidales; f__Muribaculaceae; g__uncultured bacterium; s__uncultured bacterium
OTU_418	0	0	0	5	0	1	0	0	0	0	0	0	0	0	0	0	0	0	0	0	0	0	0	0	0	0	0	0	0	0	k__Bacteria; p__Proteobacteria; c__Alphaproteobacteria; o__Sphingomonadales; f__Sphingomonadaceae; g__Sphingomonas
OTU_1109	0	0	0	2	0	0	0	0	0	0	0	0	0	0	0	0	0	0	0	0	0	0	0	0	0	0	0	0	0	0	k__Bacteria; p__Bacteroidetes; c__Bacteroidia; o__Bacteroidales; f__Muribaculaceae; g__uncultured bacterium; s__uncultured bacterium
OTU_305	0	0	0	20	1	1	0	0	0	0	0	5	2	0	0	0	0	0	0	0	0	0	0	0	0	0	0	0	0	0	k__Bacteria; p__Proteobacteria; c__Gammaproteobacteria; o__Alteromonadales; f__Pseudoalteromonadaceae; g__Pseudoalteromonas; s__uncultured Pseudoalteromonas sp.
OTU_250	0	0	0	3	2	0	0	0	0	0	29	4	9	0	0	0	0	0	0	0	0	0	0	0	0	0	0	0	0	0	k__Bacteria; p__Proteobacteria; c__Gammaproteobacteria; o__Pasteurellales; f__Pasteurellaceae; g__Phocoenobacter; s__uncultured bacterium
OTU_186	0	0	0	32	60	0	0	12	16	0	0	31	26	0	0	0	0	0	0	0	0	0	0	0	0	0	0	0	0	0	k__Bacteria; p__Proteobacteria; c__Gammaproteobacteria; o__Pseudomonadales; f__Moraxellaceae; g__Psychrobacter
OTU_134	0	0	0	3	0	2	30	21	47	54	21	5	45	12	0	3	0	0	0	0	11	4	5	42	51	0	11	32	13	57	k__Bacteria; p__Firmicutes; c__Clostridia; o__Clostridiales; f__Lachnospiraceae
OTU_236	0	0	0	28	0	1	0	0	1	3	1	18	0	0	0	0	0	0	0	0	0	0	0	0	0	0	0	0	0	2	k__Bacteria; p__Firmicutes; c__Clostridia; o__Clostridiales; f__Ruminococcaceae; g__Subdoligranulum; s__uncultured bacterium
OTU_741	0	0	0	2	0	0	5	3	3	0	1	4	62	0	0	1	0	0	0	0	0	0	1	0	3	0	1	0	2	0	k__Bacteria; p__Firmicutes; c__Clostridia; o__Clostridiales; f__Lachnospiraceae; g__Lachnoclostridium; s__uncultured bacterium
OTU_1299	0	0	0	4	0	0	8	11	0	1	34	26	7	11	0	14	16	18	6	17	1	16	7	33	15	2	6	1	39	8	k__Bacteria; p__Bacteroidetes; c__Bacteroidia; o__Bacteroidales; f__Muribaculaceae; g__uncultured bacterium; s__uncultured bacterium
OTU_365	0	0	0	1	0	2	0	0	0	0	0	0	0	5	0	0	0	0	0	0	0	0	0	1	0	0	0	0	1	0	k__Bacteria; p__Firmicutes; c__Clostridia; o__Clostridiales; f__Lachnospiraceae
OTU_1075	0	0	0	3	2	1	0	0	0	1	0	0	1	0	0	0	0	1	0	3	1	0	0	0	0	0	1	0	3	1	k__Bacteria; p__Bacteroidetes; c__Bacteroidia; o__Bacteroidales; f__Muribaculaceae
OTU_794	0	0	0	1	0	0	0	0	0	0	0	0	0	0	0	2	0	0	0	1	0	0	0	2	0	3	4	0	1	0	k__Bacteria; p__Bacteroidetes; c__Bacteroidia; o__Bacteroidales; f__Bacteroidaceae; g__Bacteroides
OTU_1074	0	0	0	10	0	0	1	2	2	0	0	0	0	10	0	11	0	0	0	0	0	7	3	1	3	0	1	0	1	0	k__Bacteria; p__Bacteroidetes; c__Bacteroidia; o__Bacteroidales
OTU_653	0	0	0	4	0	10	15	2	5	7	10	4	4	15	0	2	0	3	6	14	2	8	1	1	2	0	3	0	1	6	k__Bacteria; p__Bacteroidetes; c__Bacteroidia; o__Bacteroidales; f__Muribaculaceae; g__uncultured bacterium; s__uncultured bacterium
OTU_389	0	0	0	4	0	0	1	0	1	2	0	0	0	1	0	0	0	0	1	0	0	0	0	0	0	0	0	0	0	0	k__Bacteria; p__Proteobacteria; c__Gammaproteobacteria; o__Betaproteobacteriales; f__Burkholderiaceae; g__Parasutterella; s__uncultured organism
OTU_669	0	0	0	3	0	0	0	0	4	3	0	0	0	1	0	7	0	0	0	7	0	3	0	1	4	0	25	0	0	0	k__Bacteria; p__Bacteroidetes; c__Bacteroidia; o__Bacteroidales; f__Bacteroidaceae; g__Bacteroides
OTU_712	0	0	0	5	1	0	0	0	0	0	1	3	4	1	0	3	1	6	0	0	0	1	2	0	0	0	0	0	1	3	k__Bacteria; p__Bacteroidetes; c__Bacteroidia; o__Bacteroidales
OTU_1302	0	0	0	2	0	0	1	1	0	0	0	1	0	2	0	0	1	0	2	0	1	0	2	9	0	1	2	0	2	0	k__Bacteria; p__Bacteroidetes; c__Bacteroidia; o__Bacteroidales; f__Muribaculaceae; g__uncultured bacterium; s__uncultured bacterium
OTU_700	0	0	0	1	0	0	1	2	0	1	0	0	0	0	0	0	0	0	0	0	0	0	0	2	0	0	0	0	0	0	k__Bacteria; p__Acidobacteria; c__Subgroup 6
OTU_742	0	0	0	1	5	0	0	0	1	2	0	3	1	0	0	0	0	0	0	1	1	1	2	0	0	3	0	0	0	0	k__Bacteria; p__Bacteroidetes; c__Bacteroidia; o__Bacteroidales; f__Rikenellaceae; g__Rikenellaceae RC9 gut group; s__uncultured bacterium
OTU_1128	0	0	0	2	0	0	0	0	1	0	0	0	0	0	0	0	0	0	0	0	0	0	0	0	0	0	0	0	0	0	k__Bacteria; p__Proteobacteria; c__Alphaproteobacteria; o__Acetobacterales; f__Acetobacteraceae
OTU_728	0	0	0	2	0	0	0	0	0	0	0	0	2	0	0	0	0	0	0	0	0	0	0	0	0	1	0	0	0	0	k__Bacteria; p__Bacteroidetes; c__Bacteroidia; o__Bacteroidales; f__Muribaculaceae; g__uncultured bacterium; s__uncultured bacterium
OTU_81	0	0	0	3	0	38	226	86	216	284	7	0	0	1	0	0	0	0	0	0	6	2	16	201	8	0	6	71	14	85	k__Bacteria; p__Firmicutes; c__Clostridia; o__Clostridiales; f__Lachnospiraceae
OTU_195	0	0	0	1	1	0	0	0	0	0	0	8	34	1	1	3	0	0	2	2	0	0	0	0	3	15	0	0	0	0	k__Bacteria; p__Firmicutes; c__Clostridia; o__Clostridiales; f__Ruminococcaceae; g__Ruminiclostridium 5
OTU_1206	0	0	0	2	0	0	0	0	0	0	0	0	0	0	0	0	0	0	0	0	0	0	0	0	0	0	0	0	0	0	k__Bacteria; p__Bacteroidetes; c__Bacteroidia; o__Bacteroidales; f__Muribaculaceae
OTU_1135	0	0	0	4	0	0	3	2	1	0	0	0	0	14	0	32	4	1	0	0	3	4	3	11	4	0	0	0	1	4	k__Bacteria; p__Bacteroidetes; c__Bacteroidia; o__Bacteroidales; f__Muribaculaceae; g__uncultured bacterium; s__uncultured bacterium
OTU_1174	0	0	0	1	0	0	0	0	1	0	0	0	2	2	0	0	0	1	0	5	0	0	0	1	0	0	0	0	0	1	k__Bacteria; p__Bacteroidetes; c__Bacteroidia; o__Bacteroidales; f__Muribaculaceae; g__uncultured bacterium; s__uncultured bacterium
OTU_961	0	0	0	1	0	0	0	0	0	0	0	0	0	0	0	0	1	0	0	0	0	0	0	0	0	3	0	0	0	0	k__Bacteria; p__Bacteroidetes; c__Bacteroidia; o__Bacteroidales
OTU_691	0	0	0	2	0	0	0	0	0	0	0	0	0	0	0	0	0	0	0	0	0	0	0	0	0	0	0	0	0	0	k__Bacteria; p__Bacteroidetes; c__Bacteroidia; o__Bacteroidales
OTU_115	0	0	0	1	0	9	15	35	19	25	43	0	1	12	0	0	0	0	0	0	1	0	8	0	0	102	0	2	2	129	k__Bacteria; p__Firmicutes; c__Clostridia; o__Clostridiales; f__Clostridiales vadinBB60 group; g__uncultured bacterium; s__uncultured bacterium
OTU_879	0	0	0	1	0	0	1	1	0	0	0	0	0	0	0	0	0	0	0	0	0	0	0	0	0	0	0	0	0	0	k__Bacteria; p__Proteobacteria; c__Gammaproteobacteria; o__Betaproteobacteriales; f__Nitrosomonadaceae; g__Ellin6067; s__uncultured bacterium
OTU_977	0	0	0	2	0	0	0	0	1	0	0	0	0	0	0	0	0	0	0	0	0	0	0	1	0	0	0	0	0	0	k__Bacteria; p__Firmicutes; c__Clostridia; o__Clostridiales; f__Ruminococcaceae; g__Ruminococcus 2; s__uncultured bacterium
OTU_90	0	0	0	1	0	6	29	33	172	37	41	14	171	0	1	16	0	0	9	24	7	3	30	67	271	93	17	46	5	309	k__Bacteria; p__Firmicutes; c__Clostridia; o__Clostridiales; f__Lachnospiraceae; g__Acetatifactor; s__uncultured bacterium
OTU_1268	0	0	0	3	2	0	0	0	1	1	0	0	0	0	0	0	2	0	0	0	2	0	1	0	0	0	0	0	1	1	k__Bacteria; p__Bacteroidetes; c__Bacteroidia; o__Bacteroidales; f__Muribaculaceae; g__uncultured bacterium; s__uncultured bacterium
OTU_89	0	0	0	2	0	279	65	98	78	34	0	0	1	59	0	1	0	0	0	2	1	6	11	16	12	0	5	47	8	51	k__Bacteria; p__Firmicutes; c__Clostridia; o__Clostridiales; f__Ruminococcaceae; g__Ruminococcaceae NK4A214 group; s__uncultured bacterium
OTU_86	0	0	0	3	1	220	226	142	191	172	0	0	0	202	0	0	0	0	0	0	4	7	21	34	170	0	6	75	12	32	k__Bacteria; p__Firmicutes; c__Clostridia; o__Clostridiales; f__Ruminococcaceae; g__Oscillibacter
OTU_127	0	0	0	2	0	0	5	5	11	10	6	0	0	7	0	0	0	6	2	1	9	2	93	31	103	6	39	78	16	36	k__Bacteria; p__Firmicutes; c__Clostridia; o__Clostridiales; f__Ruminococcaceae; g__Ruminiclostridium 5
OTU_473	0	0	0	1	0	3	5	0	3	0	4	0	0	0	0	1	0	3	2	3	0	0	3	6	0	7	1	1	0	0	k__Bacteria; p__Bacteroidetes; c__Bacteroidia; o__Bacteroidales; f__Muribaculaceae; g__uncultured bacterium; s__uncultured bacterium
OTU_832	0	0	0	1	2	0	0	0	0	0	0	0	0	0	0	1	1	0	0	1	0	0	1	0	0	0	0	0	1	0	k__Bacteria; p__Bacteroidetes; c__Bacteroidia; o__Bacteroidales; f__Muribaculaceae; g__uncultured bacterium; s__uncultured bacterium
OTU_394	0	0	0	1	0	0	1	0	0	0	1	1	1	2	0	7	5	2	0	0	0	0	0	1	0	0	0	0	1	3	k__Bacteria; p__Bacteroidetes; c__Bacteroidia; o__Bacteroidales; f__Muribaculaceae; g__uncultured bacterium; s__uncultured bacterium
OTU_1036	0	0	0	1	0	1	1	2	0	2	6	1	3	1	0	0	1	0	0	0	0	0	0	0	2	0	0	3	0	8	k__Bacteria; p__Firmicutes; c__Clostridia; o__Clostridiales; f__Ruminococcaceae
OTU_675	0	0	0	4	0	0	0	2	1	0	0	0	0	0	0	2	1	1	0	0	3	5	1	7	0	0	0	0	1	2	k__Bacteria; p__Bacteroidetes; c__Bacteroidia; o__Bacteroidales; f__Muribaculaceae; g__uncultured bacterium; s__uncultured bacterium
OTU_114	0	0	0	1	1	0	0	0	1	0	0	1	0	1	1	0	0	2	0	0	0	0	0	0	0	0	68	186	74	0	k__Bacteria; p__Proteobacteria; c__Deltaproteobacteria; o__Desulfovibrionales; f__Desulfovibrionaceae; g__Desulfovibrio; s__uncultured bacterium
OTU_1262	0	0	0	2	0	0	0	0	0	0	0	0	0	0	0	0	0	0	0	0	0	0	0	0	0	0	0	0	0	0	k__Bacteria; p__Acidobacteria; c__Subgroup 6
OTU_108	0	0	0	1	0	0	0	0	0	0	0	0	0	43	45	0	36	122	1	1	45	54	36	0	0	0	3	0	0	1	k__Bacteria; p__Bacteroidetes; c__Bacteroidia; o__Bacteroidales; f__Rikenellaceae; g__Alistipes; s__uncultured bacterium
OTU_836	0	0	0	1	0	0	0	0	0	0	0	0	2	0	0	2	1	1	0	1	0	1	0	5	0	2	1	1	0	1	k__Bacteria; p__Bacteroidetes; c__Bacteroidia; o__Bacteroidales; f__Muribaculaceae; g__uncultured bacterium; s__uncultured bacterium
OTU_390	0	0	0	1	14	0	1	0	0	0	1	0	0	0	0	0	0	0	0	1	0	0	0	0	0	0	0	0	0	0	k__Bacteria; p__Proteobacteria; c__Gammaproteobacteria; o__Pseudomonadales; f__Moraxellaceae; g__Acinetobacter
OTU_674	0	0	0	2	0	0	0	0	0	0	0	0	0	0	0	0	0	0	0	0	0	0	0	0	0	0	0	0	0	0	k__Bacteria; p__Bacteroidetes; c__Bacteroidia; o__Bacteroidales
OTU_1154	0	0	0	2	0	0	0	0	0	0	0	0	0	0	0	0	0	0	0	0	0	0	0	0	0	0	0	0	0	0	k__Bacteria
OTU_946	0	0	0	2	0	0	0	0	0	0	0	0	0	0	0	0	0	0	0	0	0	0	0	0	0	0	0	2	0	0	k__Bacteria; p__Bacteroidetes; c__Bacteroidia; o__Bacteroidales; f__Muribaculaceae; g__uncultured bacterium; s__uncultured bacterium
OTU_619	0	0	0	1	0	0	0	0	0	0	1	0	0	0	0	0	0	0	0	0	0	3	0	0	0	0	0	0	0	0	k__Bacteria
OTU_477	0	0	0	1	0	0	0	0	0	0	0	0	0	0	0	0	0	0	0	0	0	0	0	0	2	0	0	2	0	0	k__Bacteria; p__Firmicutes; c__Clostridia; o__Clostridiales; f__Ruminococcaceae; g__Candidatus Soleaferrea; s__uncultured bacterium
OTU_1018	0	0	0	1	0	0	0	0	0	0	0	1	0	0	1	0	0	0	0	0	0	0	0	0	0	0	1	0	0	1	k__Bacteria; p__Firmicutes; c__Clostridia; o__Clostridiales; f__Ruminococcaceae; g__Ruminococcus 1; s__uncultured Ruminococcus sp.
OTU_1327	0	0	0	0	2	0	0	0	0	0	0	0	0	1	0	0	3	0	0	2	0	0	0	0	0	0	0	0	0	0	k__Bacteria
OTU_1123	0	0	0	0	2	0	0	0	0	0	0	0	0	0	0	0	0	0	0	0	0	0	0	0	0	0	0	0	0	0	k__Bacteria; p__Bacteroidetes; c__Bacteroidia; o__Bacteroidales
OTU_1273	0	0	0	0	4	0	0	0	0	0	0	0	0	0	0	0	0	0	0	0	0	0	0	0	0	1	0	0	0	0	k__Bacteria; p__Bacteroidetes; c__Bacteroidia; o__Bacteroidales; f__Muribaculaceae; g__uncultured bacterium; s__uncultured bacterium
OTU_59	0	0	0	0	47	1	3	0	0	0	0	0	1	4	1805	0	0	0	2	2	0	0	0	1	0	2	0	0	1	0	k__Bacteria; p__Firmicutes; c__Clostridia; o__Clostridiales; f__Peptostreptococcaceae; g__Paeniclostridium; s__Paeniclostridium sordellii
OTU_261	0	0	0	0	13	0	1	0	0	0	9	6	0	0	0	0	2	0	0	0	0	0	0	0	0	0	0	0	0	0	k__Bacteria; p__Proteobacteria; c__Gammaproteobacteria; o__Betaproteobacteriales; f__Burkholderiaceae; g__Comamonas
OTU_679	0	0	0	0	2	0	0	0	0	0	0	0	0	0	0	0	0	0	0	0	0	0	0	0	0	0	0	0	0	0	k__Bacteria; p__Bacteroidetes; c__Bacteroidia; o__Bacteroidales; f__Muribaculaceae
OTU_1124	0	0	0	0	3	0	0	0	0	0	0	0	0	0	0	0	0	0	0	0	0	0	0	0	1	0	0	0	0	0	k__Bacteria; p__Bacteroidetes; c__Bacteroidia; o__Bacteroidales; f__Muribaculaceae; g__uncultured bacterium; s__uncultured bacterium
OTU_1111	0	0	0	0	2	0	0	0	0	0	0	0	0	0	0	0	0	0	0	0	0	0	0	0	0	0	0	0	0	0	k__Bacteria; p__Bacteroidetes; c__Bacteroidia; o__Flavobacteriales; f__Flavobacteriaceae; g__Flavobacterium
OTU_338	0	0	0	0	2	2	3	0	0	0	0	0	0	8	0	0	0	0	0	4	0	0	0	0	0	0	0	0	0	0	k__Bacteria; p__Proteobacteria; c__Gammaproteobacteria; o__Betaproteobacteriales; f__Burkholderiaceae; g__Aquabacterium
OTU_1105	0	0	0	0	1	0	0	0	0	0	0	0	0	0	0	0	0	0	0	0	0	0	0	0	0	2	0	0	0	0	k__Bacteria; p__Bacteroidetes; c__Bacteroidia; o__Bacteroidales; f__Bacteroidaceae; g__Bacteroides
OTU_302	0	0	0	0	1	0	0	1	9	2	2	0	3	1	0	0	0	1	0	0	0	0	1	0	0	1	0	26	0	4	k__Bacteria; p__Firmicutes; c__Clostridia; o__Clostridiales; f__Lachnospiraceae
OTU_247	0	0	0	0	6	0	0	0	0	0	7	7	0	0	0	0	0	0	0	0	0	0	0	0	0	0	0	0	0	0	k__Bacteria; p__Bacteroidetes; c__Bacteroidia; o__Flavobacteriales; f__Weeksellaceae; g__Chryseobacterium
OTU_1129	0	0	0	0	3	0	1	0	2	0	0	0	0	5	0	0	0	0	0	2	0	0	0	2	1	0	0	0	0	2	k__Bacteria; p__Bacteroidetes; c__Bacteroidia; o__Bacteroidales; f__Muribaculaceae; g__uncultured bacterium; s__uncultured bacterium
OTU_519	0	0	0	0	3	0	0	0	0	0	0	0	0	0	0	0	0	0	0	0	0	0	0	0	0	0	0	0	0	0	k__Bacteria; p__Bacteroidetes; c__Bacteroidia; o__Bacteroidales
OTU_693	0	0	0	0	3	0	1	0	0	0	0	2	0	0	0	0	0	0	0	0	0	0	0	0	0	0	0	0	0	0	k__Bacteria; p__Proteobacteria; c__Gammaproteobacteria; o__Pseudomonadales; f__Moraxellaceae; g__Psychrobacter
OTU_203	0	0	0	0	2	0	0	0	0	0	51	4	14	0	0	0	0	0	0	0	0	0	0	0	0	0	0	0	0	0	k__Bacteria; p__Proteobacteria; c__Gammaproteobacteria; o__Betaproteobacteriales; f__Burkholderiaceae; g__Pusillimonas; s__uncultured bacterium
OTU_1017	0	0	0	0	2	0	0	0	0	0	0	0	0	0	0	0	0	0	0	0	0	0	0	0	0	0	0	0	0	0	k__Bacteria; p__Bacteroidetes; c__Bacteroidia; o__Bacteroidales; f__Muribaculaceae; g__uncultured bacterium; s__uncultured bacterium
OTU_980	0	0	0	0	5	0	0	0	0	0	0	0	0	0	0	0	0	0	0	0	1	0	0	0	0	0	0	0	0	0	k__Bacteria; p__Bacteroidetes; c__Bacteroidia; o__Bacteroidales; f__Muribaculaceae
OTU_615	0	0	0	0	2	0	0	0	0	0	0	0	0	0	0	0	0	0	2	0	0	0	0	0	0	0	0	0	0	0	k__Bacteria; p__Firmicutes; c__Erysipelotrichia; o__Erysipelotrichales; f__Erysipelotrichaceae
OTU_242	0	0	0	0	1	0	0	0	0	0	4	1	27	0	0	1	0	0	0	0	0	0	0	6	3	0	1	17	0	8	k__Bacteria; p__Firmicutes; c__Clostridia; o__Clostridiales; f__Ruminococcaceae; g__Ruminococcaceae UCG-009; s__uncultured bacterium
OTU_1015	0	0	0	0	2	0	0	0	0	0	0	0	0	0	0	0	0	0	0	0	0	0	0	0	0	0	0	0	0	0	k__Bacteria; p__Bacteroidetes; c__Bacteroidia; o__Bacteroidales; f__Muribaculaceae
OTU_983	0	0	0	0	2	0	0	0	0	0	0	0	0	0	0	0	0	0	0	0	0	0	0	0	0	0	0	0	0	0	k__Bacteria; p__Bacteroidetes; c__Bacteroidia; o__Bacteroidales; f__Muribaculaceae; g__uncultured bacterium; s__uncultured bacterium
OTU_168	0	0	0	0	1	301	1578	6	4	2	0	1	0	583	0	0	0	0	0	0	0	0	0	1	0	0	1	2	1	0	k__Bacteria; p__Firmicutes; c__Clostridia; o__Clostridiales; f__Lachnospiraceae
OTU_984	0	0	0	0	2	0	0	0	0	0	0	0	0	0	0	0	0	0	0	0	0	0	0	0	0	0	0	0	0	0	k__Bacteria; p__Bacteroidetes; c__Bacteroidia; o__Bacteroidales; f__Muribaculaceae; g__uncultured bacterium; s__uncultured bacterium
OTU_1295	0	0	0	0	2	0	0	0	0	0	0	0	0	0	0	0	0	0	0	0	0	0	0	0	0	0	0	0	0	0	k__Bacteria; p__Actinobacteria; c__Coriobacteriia; o__Coriobacteriales; f__Atopobiaceae; g__Coriobacteriaceae UCG-002; s__uncultured bacterium
OTU_658	0	0	0	0	1	0	2	3	0	2	0	0	0	4	0	0	0	0	0	9	0	0	1	3	0	1	0	0	0	0	k__Bacteria; p__Firmicutes; c__Clostridia; o__Clostridiales; f__Ruminococcaceae
OTU_979	0	0	0	0	2	0	0	0	0	0	0	0	0	0	0	0	0	0	0	0	0	0	0	0	0	0	0	0	0	0	k__Bacteria; p__Bacteroidetes; c__Bacteroidia; o__Bacteroidales; f__Muribaculaceae; g__uncultured bacterium; s__uncultured bacterium
OTU_328	0	0	0	0	1	10	3	6	6	7	0	2	0	543	0	0	0	4	0	0	0	0	0	0	84	0	43	22	2	22	k__Bacteria; p__Firmicutes; c__Clostridia; o__Clostridiales; f__Ruminococcaceae; g__Ruminiclostridium; s__uncultured bacterium
OTU_84	0	0	0	0	1	0	0	0	0	0	0	0	0	18	0	88	0	5	56	46	4	203	53	666	25	0	0	1	1	245	k__Bacteria; p__Firmicutes; c__Clostridia; o__Clostridiales; f__Ruminococcaceae; g__[Eubacterium] coprostanoligenes group
OTU_717	0	0	0	0	1	0	0	0	0	0	0	0	0	0	0	0	0	0	0	0	0	0	0	0	0	2	0	0	0	0	k__Bacteria; p__Firmicutes; c__Clostridia; o__Clostridiales; f__Ruminococcaceae; g__Anaerotruncus; s__Anaerotruncus colihominis DSM 17241
OTU_553	0	0	0	0	1	0	0	0	0	0	0	0	0	2	0	0	0	0	0	0	0	4	1	0	0	0	0	0	0	0	k__Bacteria; p__Bacteroidetes; c__Bacteroidia; o__Bacteroidales; f__Muribaculaceae; g__uncultured bacterium; s__uncultured bacterium
OTU_849	0	0	0	0	2	0	0	0	0	0	0	0	0	0	0	0	0	0	0	0	0	0	0	0	0	0	0	0	0	0	k__Bacteria; p__Bacteroidetes; c__Bacteroidia; o__Bacteroidales; f__Muribaculaceae; g__uncultured bacterium; s__uncultured bacterium
OTU_543	0	0	0	0	3	0	0	0	0	0	0	0	0	0	0	0	0	0	0	0	0	0	0	0	0	0	0	0	0	0	k__Bacteria; p__Bacteroidetes; c__Bacteroidia; o__Bacteroidales; f__Muribaculaceae; g__uncultured bacterium; s__uncultured bacterium
OTU_72	0	0	0	0	0	74	109	52	64	47	69	85	11	103	0	0	0	12	0	0	9	6	19	0	0	0	39	1030	37	130	k__Bacteria; p__Firmicutes; c__Clostridia; o__Clostridiales; f__Clostridiales vadinBB60 group; g__uncultured bacterium; s__uncultured bacterium
OTU_105	0	0	0	0	0	24	17	120	54	20	3	6	11	9	0	0	8	14	0	2	48	12	28	23	11	22	9	50	33	15	k__Bacteria; p__Actinobacteria; c__Coriobacteriia; o__Coriobacteriales; f__Eggerthellaceae; g__Enterorhabdus; s__uncultured bacterium
OTU_322	0	0	0	0	0	12	6	7	6	0	0	0	0	0	0	0	0	0	0	0	0	0	0	0	0	0	0	0	0	0	k__Bacteria; p__Bacteroidetes; c__Bacteroidia; o__Flavobacteriales; f__Flavobacteriaceae; g__Tenacibaculum; s__Tenacibaculum soleae
OTU_107	0	0	0	0	0	89	87	126	199	115	22	0	270	0	0	0	0	1	0	0	0	0	0	1	3	0	0	0	0	0	k__Bacteria; p__Firmicutes; c__Clostridia; o__Clostridiales; f__Lachnospiraceae
OTU_140	0	0	0	0	0	96	36	3	35	2	13	0	0	0	0	0	0	0	0	0	0	0	0	1	0	0	4	117	8	6	k__Bacteria; p__Firmicutes; c__Clostridia; o__Clostridiales; f__Lachnospiraceae; g__Roseburia; s__Eubacterium sp. 14-2
OTU_642	0	0	0	0	0	1	1	0	0	2	0	0	0	0	0	0	0	0	0	0	0	0	0	0	0	0	0	0	0	0	k__Bacteria; p__Firmicutes; c__Clostridia; o__Clostridiales; f__Ruminococcaceae
OTU_834	0	0	0	0	0	2	30	1	14	6	4	0	3	1	0	0	0	0	0	0	0	0	0	3	2	7	0	14	0	6	k__Bacteria; p__Firmicutes; c__Clostridia; o__Clostridiales; f__Lachnospiraceae
OTU_58	0	0	0	0	0	139	158	240	361	362	163	1	909	1	1	1	0	0	0	0	0	0	0	1	0	0	7	191	12	246	k__Bacteria; p__Firmicutes; c__Clostridia; o__Clostridiales; f__Lachnospiraceae
OTU_883	0	0	0	0	0	9	26	15	11	2	10	8	5	9	0	0	0	1	21	42	3	0	16	0	0	0	0	1	4	0	k__Bacteria; p__Firmicutes; c__Clostridia; o__Clostridiales; f__Ruminococcaceae
OTU_482	0	0	0	0	0	11	12	2	16	10	1	0	6	2	0	0	0	0	0	0	0	0	0	0	0	0	0	0	0	3	k__Bacteria; p__Firmicutes; c__Clostridia; o__Clostridiales; f__Lachnospiraceae
OTU_309	0	0	0	0	0	15	0	0	0	0	0	0	0	0	0	0	0	0	0	0	0	0	0	0	0	0	0	0	0	0	k__Bacteria; p__Bacteroidetes; c__Bacteroidia; o__Flavobacteriales; f__Weeksellaceae; g__uncultured; s__uncultured bacterium
OTU_219	0	0	0	0	0	6	0	0	0	0	1	5	2	0	0	9	7	0	0	2	0	0	0	0	0	0	0	5	0	4	k__Bacteria; p__Firmicutes; c__Erysipelotrichia; o__Erysipelotrichales; f__Erysipelotrichaceae; g__Turicibacter; s__uncultured bacterium
OTU_189	0	0	0	0	0	95	2	0	0	0	0	0	0	0	0	0	0	0	0	0	0	0	0	0	2	0	1	2	0	0	k__Bacteria; p__Firmicutes; c__Clostridia; o__Clostridiales; f__Ruminococcaceae; g__Ruminococcaceae UCG-014
OTU_123	0	0	0	0	0	53	31	11	38	68	20	14	74	20	0	0	0	9	0	0	8	37	11	10	1	0	0	0	0	17	k__Bacteria; p__Firmicutes; c__Clostridia; o__Clostridiales; f__Family XIII; g__Family XIII AD3011 group
OTU_100	0	0	0	0	0	25	7	14	40	86	51	0	1	1	0	0	0	0	4	12	0	0	0	38	35	53	0	355	8	1	k__Bacteria; p__Firmicutes; c__Clostridia; o__Clostridiales; f__Lachnospiraceae; g__[Eubacterium] xylanophilum group; s__uncultured bacterium
OTU_851	0	0	0	0	0	8	54	0	0	0	0	0	0	4	0	0	0	0	0	0	0	0	0	0	0	0	0	0	0	0	k__Bacteria; p__Firmicutes; c__Clostridia; o__Clostridiales; f__Lachnospiraceae; g__uncultured; s__uncultured bacterium
OTU_125	0	0	0	0	0	71	64	61	54	46	40	21	283	73	0	0	3	0	0	1	4	2	8	25	7	0	23	238	39	62	k__Bacteria; p__Firmicutes; c__Clostridia; o__Clostridiales; f__Lachnospiraceae
OTU_738	0	0	0	0	0	32	3	0	0	0	0	0	0	0	0	5	0	0	0	0	0	0	0	0	0	0	0	0	0	0	k__Bacteria; p__Firmicutes; c__Clostridia; o__Clostridiales; f__Ruminococcaceae; g__Ruminococcaceae UCG-014
OTU_139	0	0	0	0	0	7	15	5	27	4	27	13	120	3	0	1	13	0	1	0	2	5	4	13	8	0	2	107	2	8	k__Bacteria; p__Firmicutes; c__Clostridia; o__Clostridiales; f__Lachnospiraceae
OTU_144	0	0	0	0	0	5	2	15	4	3	0	0	0	74	0	0	0	1	0	0	0	0	0	0	0	0	3	24	16	0	k__Bacteria; p__Patescibacteria; c__Saccharimonadia; o__Saccharimonadales; f__Saccharimonadaceae; g__Candidatus Saccharimonas; s__uncultured bacterium
OTU_978	0	0	0	0	0	30	76	19	133	83	58	9	75	1	0	0	0	0	0	1	1	0	0	46	39	150	1	143	0	25	k__Bacteria; p__Firmicutes; c__Clostridia; o__Clostridiales; f__Lachnospiraceae
OTU_378	0	0	0	0	0	15	0	0	0	0	0	0	0	0	0	0	0	0	0	0	0	0	0	0	0	0	0	0	0	0	k__Bacteria; p__Firmicutes; c__Clostridia; o__Clostridiales; f__Lachnospiraceae
OTU_155	0	0	0	0	0	8	8	4	0	1	4	0	20	48	0	0	0	0	2	1	5	2	11	17	13	2	0	12	0	4	k__Bacteria; p__Firmicutes; c__Clostridia; o__Clostridiales; f__Christensenellaceae
OTU_121	0	0	0	0	0	26	38	0	0	0	0	0	0	305	0	0	0	0	0	0	0	0	0	0	0	0	0	4	0	0	k__Bacteria; p__Firmicutes; c__Clostridia; o__Clostridiales; f__Ruminococcaceae; g__Ruminococcus 1
OTU_198	0	0	0	0	0	17	20	12	29	22	0	0	0	0	0	0	0	0	0	0	1	0	2	2	2	0	5	21	9	0	k__Bacteria; p__Firmicutes; c__Clostridia; o__Clostridiales; f__Clostridiales vadinBB60 group; g__uncultured bacterium; s__uncultured bacterium
OTU_124	0	0	0	0	0	30	161	2	77	35	25	4	30	20	0	0	1	0	0	0	3	0	1	58	18	123	8	133	19	14	k__Bacteria; p__Firmicutes; c__Clostridia; o__Clostridiales; f__Lachnospiraceae; g__uncultured; s__Clostridium sp. Culture-54
OTU_212	0	0	0	0	0	12	22	16	3	4	2	0	9	15	0	0	6	1	0	0	0	2	4	0	0	0	1	4	1	4	k__Bacteria; p__Firmicutes; c__Clostridia; o__Clostridiales; f__Ruminococcaceae; g__GCA-900066225
OTU_443	0	0	0	0	0	11	0	13	5	27	2	1	0	0	0	0	0	4	7	34	1	0	7	0	1	0	1	15	5	1	k__Bacteria; p__Firmicutes; c__Erysipelotrichia; o__Erysipelotrichales; f__Erysipelotrichaceae; g__Faecalibaculum; s__Faecalibaculum rodentium
OTU_335	0	0	0	0	0	11	42	7	41	15	7	1	9	0	0	0	0	0	0	3	0	1	0	0	7	3	3	4	4	4	k__Bacteria; p__Firmicutes; c__Clostridia; o__Clostridiales; f__Lachnospiraceae
OTU_681	0	0	0	0	0	10	14	0	5	8	0	0	3	22	0	0	0	0	0	0	0	0	0	0	1	5	0	0	0	0	k__Bacteria; p__Firmicutes; c__Clostridia; o__Clostridiales; f__Lachnospiraceae; g__Lachnospiraceae NK4A136 group
OTU_258	0	0	0	0	0	3	10	0	0	0	0	0	0	0	0	0	0	0	0	0	0	0	0	0	0	0	1	19	2	0	k__Bacteria; p__Firmicutes; c__Clostridia; o__Clostridiales; f__Clostridiales vadinBB60 group; g__uncultured bacterium; s__uncultured bacterium
OTU_510	0	0	0	0	0	7	2	9	9	4	0	0	0	0	0	0	0	0	0	0	2	0	2	0	0	2	0	4	3	5	k__Bacteria; p__Firmicutes; c__Clostridia; o__Clostridiales; f__Lachnospiraceae; g__Lachnospiraceae NK4A136 group; s__uncultured Clostridiales bacterium
OTU_1177	0	0	0	0	0	18	0	1	0	0	1	0	2	0	0	0	0	0	0	0	0	0	0	0	0	0	0	0	0	0	k__Bacteria; p__Firmicutes; c__Bacilli; o__Bacillales; f__Staphylococcaceae; g__Staphylococcus
OTU_313	0	0	0	0	0	12	40	0	4	0	0	0	0	0	0	0	0	0	0	6	0	0	0	0	0	1	1	7	0	0	k__Bacteria; p__Firmicutes; c__Clostridia; o__Clostridiales; f__Lachnospiraceae
OTU_118	0	0	0	0	0	21	0	29	33	38	8	2	4	121	1	0	10	0	0	1	0	0	11	1	1	1	16	81	9	69	k__Bacteria; p__Firmicutes; c__Clostridia; o__Clostridiales; f__Ruminococcaceae; g__Harryflintia; s__uncultured bacterium
OTU_311	0	0	0	0	0	15	0	0	0	0	0	0	0	0	1	0	0	0	0	0	0	0	0	0	0	0	0	0	0	0	k__Bacteria; p__Firmicutes; c__Clostridia; o__Clostridiales; f__Peptococcaceae; g__Peptococcus; s__uncultured bacterium
OTU_174	0	0	0	0	0	22	9	10	65	24	28	0	1	0	0	0	0	0	0	0	0	0	0	0	0	0	0	0	0	0	k__Bacteria; p__Firmicutes; c__Clostridia; o__Clostridiales; f__Lachnospiraceae
OTU_798	0	0	0	0	0	7	2	4	5	1	0	2	0	0	0	0	0	1	0	0	1	0	2	1	1	0	0	1	0	0	k__Bacteria; p__Firmicutes; c__Clostridia; o__Clostridiales; f__Ruminococcaceae
OTU_595	0	0	0	0	0	18	7	0	21	45	31	4	61	0	0	0	0	0	0	1	4	0	0	7	54	100	1	15	0	10	k__Bacteria; p__Firmicutes; c__Clostridia; o__Clostridiales; f__Lachnospiraceae; g__uncultured; s__uncultured bacterium
OTU_254	0	0	0	0	0	15	5	4	6	0	1	2	1	0	0	0	0	0	0	0	0	0	0	0	0	0	0	0	0	0	k__Bacteria; p__Epsilonbacteraeota; c__Campylobacteria; o__Campylobacterales; f__Arcobacteraceae; g__Arcobacter; s__uncultured bacterium
OTU_160	0	0	0	0	0	10	77	4	26	20	0	0	3	0	0	0	0	0	0	0	0	0	0	0	0	0	4	70	4	0	k__Bacteria; p__Firmicutes; c__Clostridia; o__Clostridiales; f__Lachnospiraceae
OTU_357	0	0	0	0	0	3	2	1	0	0	0	0	0	0	0	0	0	0	0	0	1	0	0	0	0	0	0	0	0	0	k__Bacteria; p__Actinobacteria; c__Actinobacteria; o__Propionibacteriales; f__Propionibacteriaceae; g__Cutibacterium; s__uncultured Propionibacterium sp.
OTU_201	0	0	0	0	0	9	15	39	13	26	0	0	0	0	0	0	0	0	0	0	0	1	0	0	1	0	0	0	0	0	k__Bacteria; p__Proteobacteria; c__Alphaproteobacteria; o__Rhodospirillales; f__uncultured
OTU_300	0	0	0	0	0	3	0	36	7	31	0	0	0	0	0	0	0	0	0	0	0	0	0	0	0	0	0	0	0	0	k__Bacteria; p__Firmicutes; c__Clostridia; o__Clostridiales; f__Lachnospiraceae; g__Marvinbryantia; s__uncultured bacterium
OTU_490	0	0	0	0	0	2	1	0	0	0	0	0	0	0	0	0	0	0	0	0	0	0	0	0	0	0	0	0	0	0	k__Bacteria; p__Tenericutes; c__Mollicutes; o__Mollicutes RF39
OTU_1011	0	0	0	0	0	2	0	0	0	0	0	0	0	0	0	0	0	0	0	0	0	0	0	0	0	0	0	0	0	0	k__Bacteria; p__Bacteroidetes; c__Bacteroidia; o__Chitinophagales; f__Saprospiraceae; g__Aureispira; s__uncultured Bacteroidetes bacterium
OTU_448	0	0	0	0	0	3	2	4	5	8	0	0	0	0	0	0	0	0	0	0	0	0	0	0	0	0	2	0	0	0	k__Bacteria; p__Firmicutes; c__Clostridia; o__Clostridiales; f__Ruminococcaceae
OTU_450	0	0	0	0	0	9	0	0	0	0	0	0	0	0	0	0	0	0	0	0	0	0	0	0	0	0	0	0	0	0	k__Bacteria; p__Proteobacteria; c__Gammaproteobacteria; o__Steroidobacterales; f__Steroidobacteraceae; g__Steroidobacter; s__uncultured bacterium
OTU_170	0	0	0	0	0	5	10	2	12	26	0	0	0	0	0	0	0	3	0	0	5	0	8	14	7	0	5	7	8	0	k__Bacteria; p__Firmicutes; c__Clostridia; o__Clostridiales; f__Christensenellaceae; g__uncultured; s__uncultured bacterium
OTU_269	0	0	0	0	0	5	21	6	10	6	0	0	0	1	0	0	0	1	0	0	0	0	0	0	0	0	1	12	0	5	k__Bacteria; p__Firmicutes; c__Clostridia; o__Clostridiales; f__Lachnospiraceae; g__Lachnospiraceae UCG-006; s__uncultured bacterium
OTU_178	0	0	0	0	0	15	8	3	2	5	4	2	0	2	0	18	1	4	0	0	4	3	1	5	0	0	1	8	14	5	k__Bacteria; p__Firmicutes; c__Clostridia; o__Clostridiales; f__Lachnospiraceae; g__Marvinbryantia; s__Clostridiales bacterium CIEAF 012
OTU_1255	0	0	0	0	0	13	1	0	1	1	0	0	1	0	0	3	1	0	0	0	0	0	0	0	0	0	0	0	0	4	k__Bacteria; p__Firmicutes; c__Clostridia; o__Clostridiales; f__Peptostreptococcaceae
OTU_840	0	0	0	0	0	1	2	0	0	0	0	0	0	0	0	0	0	0	0	0	0	0	0	0	0	0	0	0	0	0	k__Bacteria; p__Firmicutes; c__Clostridia; o__Clostridiales; f__Lachnospiraceae
OTU_225	0	0	0	0	0	21	15	0	0	0	0	0	0	0	0	0	0	0	0	0	0	0	0	2	8	0	6	1	1	0	k__Bacteria; p__Firmicutes; c__Clostridia; o__Clostridiales; f__Clostridiales vadinBB60 group; g__uncultured bacterium; s__uncultured bacterium
OTU_462	0	0	0	0	0	2	10	6	9	10	6	1	10	0	0	0	0	0	0	4	1	0	0	8	50	6	0	10	0	1	k__Bacteria; p__Firmicutes; c__Clostridia; o__Clostridiales; f__Ruminococcaceae
OTU_131	0	0	0	0	0	8	1	24	59	30	0	0	0	337	0	0	0	10	0	0	0	1	0	0	0	0	0	0	0	0	k__Bacteria; p__Firmicutes; c__Clostridia; o__Clostridiales; f__Ruminococcaceae; g__Ruminococcaceae UCG-014; s__uncultured rumen bacterium
OTU_274	0	0	0	0	0	23	0	0	0	0	0	0	0	12	0	0	0	2	0	0	0	0	0	0	0	0	0	0	1	0	k__Bacteria; p__Firmicutes; c__Clostridia; o__Clostridiales; f__Ruminococcaceae; g__Ruminococcaceae UCG-014
OTU_211	0	0	0	0	0	1	3	0	0	0	7	32	4	0	0	2	0	4	0	0	0	0	0	0	0	0	0	0	0	0	k__Bacteria; p__Firmicutes; c__Clostridia; o__Clostridiales; f__Ruminococcaceae
OTU_408	0	0	0	0	0	5	32	16	18	37	0	1	0	2	0	0	0	0	0	0	1	0	0	0	0	0	0	13	0	5	k__Bacteria; p__Firmicutes; c__Clostridia; o__Clostridiales; f__Lachnospiraceae
OTU_697	0	0	0	0	0	5	10	7	3	0	0	0	0	4	0	0	0	2	0	0	2	0	4	9	4	0	2	4	0	0	k__Bacteria; p__Firmicutes; c__Clostridia; o__Clostridiales; f__Ruminococcaceae; g__GCA-900066225; s__uncultured bacterium
OTU_91	0	0	0	0	0	3	8	1	0	1	2	0	0	0	1	175	7	17	17	11	0	1	0	0	0	0	1	0	0	488	k__Bacteria; p__Bacteroidetes; c__Bacteroidia; o__Bacteroidales; f__Bacteroidaceae; g__Bacteroides
OTU_991	0	0	0	0	0	7	38	60	103	76	0	0	0	0	0	0	0	0	0	0	0	0	0	0	0	0	16	35	19	0	k__Bacteria; p__Firmicutes; c__Clostridia; o__Clostridiales; f__Lachnospiraceae
OTU_208	0	0	0	0	0	1	1	2	1	5	10	0	0	4	0	0	0	0	0	0	3	0	5	8	14	0	0	14	1	0	k__Bacteria; p__Firmicutes; c__Clostridia; o__Clostridiales; f__Christensenellaceae
OTU_356	0	0	0	0	0	3	5	0	3	0	0	0	13	2	0	0	0	0	0	0	0	0	0	0	0	0	0	5	0	2	k__Bacteria; p__Firmicutes; c__Clostridia; o__Clostridiales; f__Lachnospiraceae; g__Lachnospiraceae FCS020 group; s__uncultured bacterium
OTU_866	0	0	0	0	0	6	0	1	0	2	23	3	14	0	0	0	0	0	0	1	0	0	1	6	45	71	0	41	0	2	k__Bacteria; p__Firmicutes; c__Clostridia; o__Clostridiales
OTU_483	0	0	0	0	0	2	0	1	0	0	0	0	1	0	1	0	0	0	0	0	0	0	0	1	2	0	1	0	0	0	k__Bacteria; p__Firmicutes; c__Bacilli; o__Bacillales; f__Thermoactinomycetaceae; g__Thermoactinomyces; s__Thermoactinomyces sp. Gus2-1
OTU_695	0	0	0	0	0	9	0	0	4	0	0	0	0	0	0	0	0	0	0	2	0	0	0	0	0	0	1	0	1	0	k__Bacteria; p__Firmicutes; c__Erysipelotrichia; o__Erysipelotrichales; f__Erysipelotrichaceae; g__Faecalibaculum; s__Faecalibaculum rodentium
OTU_1214	0	0	0	0	0	6	0	17	27	33	0	0	0	0	0	0	0	0	7	16	0	0	1	0	0	0	0	27	0	0	k__Bacteria; p__Firmicutes; c__Clostridia; o__Clostridiales; f__Clostridiales vadinBB60 group; g__uncultured bacterium; s__uncultured bacterium
OTU_922	0	0	0	0	0	2	1	0	3	4	0	0	0	2	0	0	0	0	0	0	0	0	0	0	1	0	0	2	0	2	k__Bacteria; p__Firmicutes; c__Clostridia; o__Clostridiales; f__Ruminococcaceae; g__Ruminiclostridium 5; s__uncultured bacterium
OTU_797	0	0	0	0	0	1	6	0	0	0	0	0	0	0	0	0	0	0	0	0	0	0	0	0	0	0	0	0	0	0	k__Bacteria; p__Firmicutes; c__Clostridia; o__Clostridiales
OTU_616	0	0	0	0	0	3	0	0	0	1	0	0	0	0	0	0	0	0	4	0	0	0	0	0	0	0	1	0	0	0	k__Bacteria; p__Firmicutes; c__Erysipelotrichia; o__Erysipelotrichales; f__Erysipelotrichaceae; g__Faecalibaculum
OTU_214	0	0	0	0	0	9	22	8	2	1	2	1	9	8	0	0	0	0	0	0	0	0	6	1	4	0	1	3	0	3	k__Bacteria; p__Firmicutes; c__Clostridia; o__Clostridiales; f__Ruminococcaceae; g__Ruminiclostridium 5
OTU_126	0	0	0	0	0	4	116	22	94	198	30	1	0	11	0	0	0	0	0	0	0	0	0	0	0	14	0	71	2	0	k__Bacteria; p__Firmicutes; c__Clostridia; o__Clostridiales; f__Lachnospiraceae; g__Acetatifactor; s__uncultured bacterium
OTU_1274	0	0	0	0	0	2	0	0	0	0	0	0	0	0	0	0	0	0	0	0	0	0	0	0	0	0	0	0	0	0	k__Bacteria; p__Firmicutes; c__Erysipelotrichia; o__Erysipelotrichales; f__Erysipelotrichaceae; g__Faecalibaculum; s__Faecalibaculum rodentium
OTU_453	0	0	0	0	0	2	29	7	20	4	3	1	56	14	0	0	0	0	0	0	0	0	1	4	13	17	0	9	3	0	k__Bacteria; p__Firmicutes; c__Clostridia; o__Clostridiales; f__Ruminococcaceae
OTU_606	0	0	0	0	0	8	52	4	14	24	0	0	1	30	0	1	1	4	0	0	8	2	11	0	2	1	11	73	26	7	k__Bacteria; p__Firmicutes; c__Clostridia; o__Clostridiales; f__Lachnospiraceae; g__Lachnoclostridium; s__uncultured bacterium
OTU_314	0	0	0	0	0	10	0	0	0	0	0	0	0	0	0	0	0	0	0	0	0	0	0	0	0	0	0	0	0	0	k__Bacteria; p__Bacteroidetes; c__Bacteroidia; o__Chitinophagales; f__Chitinophagaceae; g__Chitinophaga
OTU_855	0	0	0	0	0	2	0	0	0	0	0	0	0	0	0	0	0	0	0	0	0	0	0	0	0	0	0	0	0	0	k__Bacteria
OTU_856	0	0	0	0	0	3	9	0	2	0	0	0	2	1	0	0	0	2	0	4	1	0	0	0	4	0	0	0	0	0	k__Bacteria; p__Bacteroidetes; c__Bacteroidia; o__Bacteroidales; f__Muribaculaceae; g__uncultured bacterium; s__uncultured bacterium
OTU_574	0	0	0	0	0	3	2	0	0	0	0	0	0	0	0	0	0	0	0	0	0	0	0	0	0	0	0	0	0	0	k__Bacteria; p__Firmicutes; c__Clostridia; o__Clostridiales; f__Clostridiales vadinBB60 group; g__uncultured bacterium; s__uncultured bacterium
OTU_528	0	0	0	0	0	4	3	0	0	0	0	0	1	0	0	0	0	0	0	0	0	0	0	0	0	0	0	0	0	0	k__Bacteria; p__Firmicutes; c__Clostridia; o__Clostridiales; f__Ruminococcaceae
OTU_243	0	0	0	0	0	7	1	0	0	0	0	0	0	4	0	0	0	0	0	0	0	0	0	0	0	0	5	18	3	0	k__Bacteria; p__Firmicutes; c__Clostridia; o__Clostridiales; f__Family XIII
OTU_1238	0	0	0	0	0	1	33	0	4	0	0	0	0	2	0	0	0	0	0	0	0	0	0	0	0	0	0	0	0	0	k__Bacteria; p__Firmicutes; c__Clostridia; o__Clostridiales; f__Ruminococcaceae
OTU_177	0	0	0	0	0	4	49	34	25	0	0	0	0	0	0	0	0	0	0	0	0	0	0	0	0	0	0	0	0	0	k__Bacteria; p__Epsilonbacteraeota; c__Campylobacteria; o__Campylobacterales; f__Arcobacteraceae; g__Arcobacter
OTU_334	0	0	0	0	0	1	0	0	0	0	0	0	0	0	0	0	0	0	4	3	0	0	0	0	4	0	1	0	0	4	k__Bacteria; p__Bacteroidetes; c__Bacteroidia; o__Bacteroidales; f__Rikenellaceae; g__Alistipes; s__uncultured Alistipes sp.
OTU_266	0	0	0	0	0	5	0	7	5	6	0	0	0	0	0	0	0	0	0	0	0	0	0	0	0	0	0	0	0	0	k__Bacteria; p__Firmicutes; c__Clostridia; o__Clostridiales; f__Ruminococcaceae; g__Anaerotruncus; s__uncultured bacterium
OTU_1022	0	0	0	0	0	2	0	0	0	0	0	0	2	0	0	0	0	0	0	1	0	0	0	1	0	0	0	0	0	0	k__Bacteria; p__Firmicutes; c__Clostridia; o__Clostridiales; f__Ruminococcaceae
OTU_678	0	0	0	0	0	4	25	24	107	45	25	10	40	0	0	1	1	2	0	2	4	1	7	23	34	94	2	53	0	18	k__Bacteria; p__Firmicutes; c__Clostridia; o__Clostridiales; f__Lachnospiraceae
OTU_1332	0	0	0	0	0	2	0	1	7	7	36	1	9	1	0	0	0	0	0	1	0	0	0	12	56	10	0	17	0	12	k__Bacteria; p__Firmicutes; c__Clostridia; o__Clostridiales
OTU_1211	0	0	0	0	0	3	12	11	43	13	4	0	36	0	0	0	0	0	0	0	0	0	0	0	0	0	0	3	0	9	k__Bacteria; p__Firmicutes; c__Clostridia; o__Clostridiales; f__Lachnospiraceae
OTU_64	0	0	0	0	0	2	1	0	1	0	0	0	0	2	1530	1	0	0	0	0	0	0	1	0	0	0	0	1	0	0	k__Bacteria; p__Firmicutes; c__Clostridia; o__Clostridiales; f__Clostridiaceae 1; g__Clostridium sensu stricto 1; s__Clostridium perfringens
OTU_239	0	0	0	0	0	3	2	1	0	3	3	0	0	0	0	0	0	0	0	1	2	2	4	13	4	2	0	17	0	12	k__Bacteria; p__Firmicutes; c__Clostridia; o__Clostridiales; f__Lachnospiraceae; g__uncultured; s__uncultured bacterium
OTU_1031	0	0	0	0	0	3	11	0	0	1	0	0	0	0	0	0	0	0	0	0	0	0	0	0	4	0	0	0	0	0	k__Bacteria; p__Firmicutes; c__Clostridia; o__Clostridiales; f__Ruminococcaceae; g__Ruminiclostridium 9; s__uncultured bacterium
OTU_191	0	0	0	0	0	2	39	52	22	0	0	0	0	0	0	0	0	0	0	0	0	0	0	0	0	0	0	0	0	0	k__Bacteria; p__Proteobacteria; c__Alphaproteobacteria; o__Rhodobacterales; f__Rhodobacteraceae
OTU_213	0	0	0	0	0	6	7	9	6	3	0	0	1	23	0	0	3	0	0	4	0	0	0	0	0	0	0	7	0	1	k__Bacteria; p__Firmicutes; c__Clostridia; o__Clostridiales; f__Lachnospiraceae; g__Lachnoclostridium; s__uncultured bacterium
OTU_310	0	0	0	0	0	3	0	0	2	2	0	0	0	2	0	0	0	1	2	1	2	0	0	0	0	1	1	2	1	0	k__Bacteria; p__Firmicutes; c__Clostridia; o__Clostridiales; f__Lachnospiraceae; g__Anaerostipes; s__uncultured organism
OTU_96	0	0	0	0	0	5	3	19	14	14	32	39	429	17	1	0	4	0	0	0	9	3	12	30	80	0	10	48	7	62	k__Bacteria; p__Firmicutes; c__Clostridia; o__Clostridiales; f__Lachnospiraceae; g__uncultured; s__uncultured bacterium
OTU_216	0	0	0	0	0	6	6	23	18	18	7	0	3	0	0	0	0	0	0	2	4	0	1	1	1	0	3	9	0	5	k__Bacteria; p__Firmicutes; c__Clostridia; o__Clostridiales; f__Lachnospiraceae; g__GCA-900066575; s__uncultured bacterium
OTU_229	0	0	0	0	0	4	6	13	43	10	0	0	0	1	1	0	0	0	0	0	0	0	0	0	0	0	0	0	0	0	k__Bacteria; p__Firmicutes; c__Clostridia; o__Clostridiales; f__Lachnospiraceae
OTU_1231	0	0	0	0	0	7	10	1	4	4	0	0	1	6	0	0	0	0	0	0	0	0	0	0	0	0	0	1	0	1	k__Bacteria; p__Firmicutes; c__Clostridia; o__Clostridiales; f__Ruminococcaceae; g__Ruminiclostridium 9
OTU_173	0	0	0	0	0	6	12	31	40	20	0	0	0	3	0	0	0	0	0	0	0	0	0	2	5	0	1	39	3	28	k__Bacteria; p__Firmicutes; c__Clostridia; o__Clostridiales; f__Lachnospiraceae; g__GCA-900066575; s__uncultured bacterium
OTU_293	0	0	0	0	0	2	6	0	0	0	0	0	0	0	0	0	0	0	0	0	0	0	0	0	0	0	0	41	4	0	k__Bacteria; p__Firmicutes; c__Clostridia; o__Clostridiales; f__Lachnospiraceae
OTU_289	0	0	0	0	0	3	8	0	2	6	0	0	0	0	0	0	0	0	0	0	0	0	0	0	0	0	0	0	0	0	k__Bacteria; p__Firmicutes; c__Clostridia; o__Clostridiales; f__Lachnospiraceae; g__uncultured; s__uncultured bacterium
OTU_319	0	0	0	0	0	1	6	8	5	0	0	0	0	0	0	0	0	0	0	0	0	0	0	0	0	0	0	0	0	0	k__Bacteria; p__Bacteroidetes; c__Bacteroidia; o__Flavobacteriales; f__Flavobacteriaceae; g__Tenacibaculum
OTU_705	0	0	0	0	0	3	6	4	3	2	0	1	0	2	0	0	0	0	0	0	0	0	0	0	0	0	0	0	0	0	k__Bacteria; p__Firmicutes; c__Clostridia; o__Clostridiales; f__Ruminococcaceae; g__Ruminiclostridium 9; s__uncultured bacterium
OTU_202	0	0	0	0	0	2	0	3	14	16	0	0	0	3	0	0	0	0	0	0	0	0	0	0	0	0	6	24	19	6	k__Bacteria; p__Firmicutes; c__Clostridia; o__Clostridiales; f__Family XIII; g__[Eubacterium] brachy group; s__uncultured bacterium
OTU_858	0	0	0	0	0	2	0	0	0	0	0	0	0	0	0	0	0	0	0	0	0	0	0	0	0	0	0	0	0	0	k__Bacteria; p__Actinobacteria; c__Actinobacteria; o__Bifidobacteriales; f__Bifidobacteriaceae; g__Bifidobacterium
OTU_639	0	0	0	0	0	1	0	0	0	0	4	2	0	0	0	2	2	0	2	0	0	1	0	3	0	1	2	0	0	0	k__Bacteria; p__Bacteroidetes; c__Bacteroidia; o__Bacteroidales; f__Muribaculaceae
OTU_217	0	0	0	0	0	4	6	12	26	19	0	0	0	5	0	0	0	0	0	0	0	0	0	0	0	0	1	4	1	0	k__Bacteria; p__Firmicutes; c__Clostridia; o__Clostridiales; f__Lachnospiraceae
OTU_1153	0	0	0	0	0	1	7	5	1	2	28	16	10	41	0	30	2	12	13	40	3	6	10	5	17	1	10	0	13	12	k__Bacteria; p__Bacteroidetes; c__Bacteroidia; o__Bacteroidales; f__Muribaculaceae; g__uncultured bacterium; s__uncultured bacterium
OTU_1320	0	0	0	0	0	1	0	0	3	0	0	0	1	0	0	0	0	0	0	0	0	0	0	0	0	0	0	0	0	0	k__Bacteria; p__Actinobacteria; c__Acidimicrobiia; o__uncultured; f__uncultured Acidimicrobidae bacterium; g__uncultured Acidimicrobidae bacterium; s__uncultured Acidimicrobidae bacterium
OTU_578	0	0	0	0	0	3	0	0	0	0	0	0	0	0	0	0	0	0	0	0	0	0	0	0	0	0	0	0	0	0	k__Bacteria; p__Proteobacteria; c__Gammaproteobacteria; o__Alteromonadales; f__Colwelliaceae; g__Colwellia
OTU_1296	0	0	0	0	0	3	0	1	0	0	1	0	0	1	0	0	0	0	0	1	0	0	0	0	1	0	0	0	0	1	k__Bacteria
OTU_981	0	0	0	0	0	2	0	0	0	0	0	0	0	0	0	0	0	0	0	0	0	0	0	0	0	0	0	0	0	0	k__Bacteria; p__Proteobacteria; c__Gammaproteobacteria; o__Oceanospirillales; f__Halomonadaceae; g__Halomonas
OTU_872	0	0	0	0	0	2	0	0	0	0	0	0	0	0	0	0	0	0	0	0	0	0	0	0	0	0	0	0	0	0	k__Bacteria; p__Bacteroidetes; c__Bacteroidia; o__Chitinophagales; f__Chitinophagaceae; g__Flavihumibacter; s__uncultured bacterium
OTU_329	0	0	0	0	0	1	7	1	3	2	0	0	0	0	0	0	0	0	0	0	0	0	2	2	0	0	0	2	0	0	k__Bacteria; p__Firmicutes; c__Clostridia; o__Clostridiales; f__Lachnospiraceae
OTU_282	0	0	0	0	0	1	0	0	0	0	0	0	0	0	0	26	0	0	0	0	0	0	0	0	0	0	0	0	0	0	k__Bacteria; p__Bacteroidetes; c__Bacteroidia; o__Bacteroidales; f__Bacteroidaceae; g__Bacteroides
OTU_1157	0	0	0	0	0	2	0	0	0	0	0	0	0	0	0	0	0	0	0	0	0	0	0	0	0	0	0	0	0	0	k__Bacteria; p__Actinobacteria; c__Actinobacteria; o__Pseudonocardiales; f__Pseudonocardiaceae
OTU_568	0	0	0	0	0	5	0	0	0	0	0	0	0	0	0	0	0	0	0	0	0	0	0	0	0	0	0	0	0	0	k__Bacteria; p__Proteobacteria; c__Gammaproteobacteria; o__Betaproteobacteriales; f__Burkholderiaceae; g__Acidovorax
OTU_1292	0	0	0	0	0	1	18	8	25	7	2	0	7	1	0	0	0	0	0	0	0	0	2	4	5	5	1	1	1	1	k__Bacteria; p__Firmicutes; c__Clostridia; o__Clostridiales; f__Ruminococcaceae
OTU_750	0	0	0	0	0	1	0	0	0	0	0	0	0	0	0	0	0	0	0	0	0	0	0	0	0	1	0	0	0	0	k__Bacteria; p__Bacteroidetes; c__Bacteroidia; o__Bacteroidales; f__Muribaculaceae; g__uncultured bacterium; s__uncultured bacterium
OTU_570	0	0	0	0	0	4	0	0	0	0	0	0	1	0	0	0	0	0	0	0	0	0	0	0	0	0	0	0	0	0	k__Bacteria; p__Actinobacteria; c__Acidimicrobiia; o__Microtrichales; f__uncultured; g__uncultured bacterium; s__uncultured bacterium
OTU_172	0	0	0	0	0	1	4	14	97	12	0	0	0	0	0	0	0	0	0	0	0	0	0	0	0	0	7	62	3	0	k__Bacteria; p__Firmicutes; c__Clostridia; o__Clostridiales; f__Family XIII; g__Family XIII UCG-001; s__uncultured bacterium
OTU_449	0	0	0	0	0	2	7	0	0	0	0	0	0	0	0	0	0	0	0	0	0	0	0	0	0	0	0	0	0	0	k__Bacteria; p__Firmicutes; c__Clostridia; o__Clostridiales; f__Lachnospiraceae
OTU_1132	0	0	0	0	0	2	0	0	0	0	3	1	0	0	0	0	0	0	0	0	1	1	0	0	0	0	0	0	0	0	k__Bacteria; p__Firmicutes; c__Bacilli; o__Bacillales; f__Bacillaceae; g__Anoxybacillus
OTU_769	0	0	0	0	0	4	18	0	0	0	0	0	0	0	0	0	0	0	0	0	0	0	0	15	4	0	1	4	1	4	k__Bacteria; p__Firmicutes; c__Clostridia; o__Clostridiales; f__Lachnospiraceae
OTU_143	0	0	0	0	0	1	7	38	17	74	16	0	11	10	0	0	0	0	0	0	6	0	6	39	7	42	0	22	0	14	k__Bacteria; p__Firmicutes; c__Clostridia; o__Clostridiales; f__Lachnospiraceae; g__uncultured; s__uncultured bacterium
OTU_1033	0	0	0	0	0	1	4	0	28	7	0	0	0	9	0	0	0	2	0	0	0	0	11	0	0	0	0	0	0	0	k__Bacteria; p__Firmicutes; c__Clostridia; o__Clostridiales; f__Lachnospiraceae
OTU_1221	0	0	0	0	0	1	0	14	9	4	0	0	0	0	0	0	0	0	0	0	0	0	0	0	0	0	0	2	1	2	k__Bacteria; p__Firmicutes; c__Clostridia; o__Clostridiales; f__Lachnospiraceae
OTU_419	0	0	0	0	0	2	0	0	0	0	0	0	0	0	0	0	0	0	0	0	0	6	8	1	1	0	1	1	0	0	k__Bacteria; p__Firmicutes; c__Clostridia; o__Clostridiales; f__Ruminococcaceae; g__Ruminococcaceae UCG-005
OTU_802	0	0	0	0	0	3	54	9	51	26	7	0	5	1	0	0	0	0	0	0	0	0	0	1	5	15	0	2	2	1	k__Bacteria; p__Firmicutes; c__Clostridia; o__Clostridiales; f__Lachnospiraceae
OTU_312	0	0	0	0	0	3	0	2	1	0	0	0	1	0	0	2	0	0	0	1	3	0	0	0	0	0	0	2	0	1	k__Bacteria; p__Proteobacteria; c__Gammaproteobacteria; o__Betaproteobacteriales; f__Burkholderiaceae; g__Burkholderia-Caballeronia-Paraburkholderia
OTU_572	0	0	0	0	0	1	6	0	0	0	0	0	0	0	0	0	0	9	0	0	0	0	0	0	0	0	0	0	0	0	k__Bacteria; p__Firmicutes; c__Clostridia; o__Clostridiales; f__Lachnospiraceae; g__Lachnospiraceae NK4A136 group; s__uncultured bacterium
OTU_576	0	0	0	0	0	3	3	1	3	0	0	0	0	0	0	0	0	0	0	1	0	0	0	0	0	0	0	1	0	0	k__Bacteria; p__Firmicutes; c__Clostridia; o__Clostridiales; f__Ruminococcaceae; g__Ruminiclostridium 9; s__uncultured bacterium
OTU_907	0	0	0	0	0	1	1	0	0	0	0	0	0	0	0	0	0	0	0	0	0	0	1	0	0	0	0	0	0	0	k__Bacteria; p__Proteobacteria; c__Gammaproteobacteria; o__Betaproteobacteriales; f__Burkholderiaceae; g__Achromobacter; s__Achromobacter xylosoxidans subsp. xylosoxidans
OTU_101	0	0	0	0	0	7	4	317	73	155	0	0	0	11	0	3	0	2	0	0	4	0	0	0	0	0	12	416	36	58	k__Bacteria; p__Firmicutes; c__Clostridia; o__Clostridiales; f__Lachnospiraceae; g__Blautia; s__Lachnospiraceae bacterium 615
OTU_523	0	0	0	0	0	3	0	0	0	0	0	0	0	0	0	0	0	0	0	0	1	0	0	0	0	0	0	0	0	0	k__Bacteria; p__Proteobacteria; c__Gammaproteobacteria; o__Pseudomonadales; f__Moraxellaceae; g__Acinetobacter; s__Acinetobacter calcoaceticus
OTU_1149	0	0	0	0	0	1	0	0	0	0	0	0	1	0	0	1	2	0	0	5	0	2	1	1	0	1	2	1	1	1	k__Bacteria; p__Firmicutes; c__Bacilli; o__Lactobacillales; f__Lactobacillaceae; g__Lactobacillus; s__uncultured Lactobacillaceae bacterium
OTU_671	0	0	0	0	0	3	0	0	0	0	1	0	0	0	0	0	0	0	0	3	0	0	0	0	0	0	0	0	0	1	k__Bacteria; p__Firmicutes; c__Erysipelotrichia; o__Erysipelotrichales; f__Erysipelotrichaceae; g__Dubosiella; s__uncultured Erysipelotrichales bacterium
OTU_537	0	0	0	0	0	3	0	0	0	0	0	0	0	0	0	0	0	0	0	0	0	0	0	0	0	0	0	0	0	0	k__Bacteria
OTU_853	0	0	0	0	0	1	0	1	1	0	0	0	0	0	0	0	0	0	0	0	0	0	0	0	0	0	0	0	0	0	k__Bacteria; p__Actinobacteria; c__Actinobacteria; o__Propionibacteriales; f__Nocardioidaceae; g__Nocardioides
OTU_876	0	0	0	0	0	3	14	9	20	9	20	2	17	0	0	0	0	0	0	0	6	0	0	7	49	21	1	30	0	27	k__Bacteria; p__Firmicutes; c__Clostridia; o__Clostridiales
OTU_871	0	0	0	0	0	1	4	0	0	0	0	0	0	0	0	0	0	0	0	0	0	0	0	0	0	0	0	0	0	0	k__Bacteria; p__Firmicutes; c__Clostridia; o__Clostridiales; f__Lachnospiraceae
OTU_77	0	0	0	0	0	1	48	99	518	99	4	0	0	4	0	0	0	0	0	0	0	0	0	6	2	2	7	635	314	27	k__Bacteria; p__Firmicutes; c__Clostridia; o__Clostridiales; f__Lachnospiraceae; g__Blautia
OTU_404	0	0	0	0	0	2	10	2	1	0	0	0	1	0	0	0	0	0	0	0	0	0	0	0	0	0	0	3	2	2	k__Bacteria; p__Firmicutes; c__Clostridia; o__Clostridiales; f__Lachnospiraceae; g__Lachnoclostridium; s__uncultured bacterium
OTU_273	0	0	0	0	0	1	0	0	3	6	0	0	0	4	1	0	0	0	0	26	0	7	0	0	0	0	3	0	0	2	k__Bacteria; p__Firmicutes; c__Clostridia; o__Clostridiales; f__Ruminococcaceae; g__Subdoligranulum; s__uncultured bacterium
OTU_279	0	0	0	0	0	1	1	11	2	3	0	0	0	4	0	0	0	0	0	0	3	0	0	0	0	0	2	7	1	0	k__Bacteria; p__Firmicutes; c__Clostridia; o__Clostridiales; f__Lachnospiraceae
OTU_381	0	0	0	0	0	2	0	7	4	3	0	0	0	0	0	0	0	0	0	0	0	0	0	0	0	0	0	4	0	0	k__Bacteria; p__Firmicutes; c__Clostridia; o__Clostridiales; f__Lachnospiraceae
OTU_1246	0	0	0	0	0	1	5	0	0	0	0	0	5	0	0	0	0	0	0	0	0	0	0	0	0	0	0	0	0	0	k__Bacteria; p__Firmicutes; c__Clostridia; o__Clostridiales; f__Lachnospiraceae
OTU_842	0	0	0	0	0	2	2	8	3	3	3	0	8	0	0	0	0	0	0	0	0	0	0	0	0	0	0	0	0	2	k__Bacteria; p__Firmicutes; c__Clostridia; o__Clostridiales
OTU_692	0	0	0	0	0	3	0	0	0	0	0	0	0	0	0	0	0	0	0	0	0	0	0	2	0	0	0	0	0	0	k__Bacteria; p__Bacteroidetes; c__Bacteroidia; o__Bacteroidales
OTU_848	0	0	0	0	0	1	31	0	0	0	0	0	0	5	0	0	0	0	0	0	0	0	0	0	0	0	0	0	0	0	k__Bacteria; p__Firmicutes; c__Clostridia; o__Clostridiales; f__Lachnospiraceae; g__Lachnoclostridium
OTU_726	0	0	0	0	0	2	0	47	36	28	50	42	192	73	0	0	0	0	0	0	2	6	36	11	46	104	1	36	10	0	k__Bacteria; p__Firmicutes; c__Clostridia; o__Clostridiales; f__Ruminococcaceae
OTU_251	0	0	0	0	0	1	0	0	0	0	0	0	0	0	0	1	0	0	0	0	0	0	0	1	7	0	1	2	0	9	k__Bacteria; p__Firmicutes; c__Clostridia; o__Clostridiales; f__Clostridiales vadinBB60 group; g__uncultured Clostridia bacterium; s__uncultured Clostridia bacterium
OTU_803	0	0	0	0	0	1	7	2	3	2	0	0	3	0	0	0	0	0	0	5	0	0	0	0	1	0	0	1	0	0	k__Bacteria; p__Firmicutes; c__Clostridia; o__Clostridiales; f__Ruminococcaceae; g__Intestinimonas; s__uncultured bacterium
OTU_209	0	0	0	0	0	2	0	0	0	0	16	2	2	2	3	7	0	1	0	0	4	0	3	0	0	0	2	0	5	0	k__Bacteria; p__Firmicutes; c__Erysipelotrichia; o__Erysipelotrichales; f__Erysipelotrichaceae; g__uncultured bacterium; s__uncultured bacterium
OTU_931	0	0	0	0	0	1	0	0	0	0	0	0	0	0	0	0	0	0	3	0	0	0	0	0	0	0	0	0	0	0	k__Bacteria; p__Bacteroidetes; c__Bacteroidia; o__Bacteroidales; f__Prevotellaceae; g__Alloprevotella; s__uncultured bacterium
OTU_1198	0	0	0	0	0	1	0	0	2	0	0	0	1	0	0	0	0	0	0	0	0	0	0	1	0	0	0	0	0	0	k__Bacteria; p__Firmicutes; c__Clostridia; o__Clostridiales
OTU_1046	0	0	0	0	0	1	5	0	3	0	8	1	0	0	0	0	0	0	0	0	0	0	0	0	0	0	1	8	0	3	k__Bacteria; p__Firmicutes; c__Clostridia; o__Clostridiales; f__Clostridiales vadinBB60 group; g__uncultured bacterium; s__uncultured bacterium
OTU_1045	0	0	0	0	0	1	1	0	0	5	0	0	1	0	0	0	0	0	0	0	0	0	0	0	0	0	0	0	0	0	k__Bacteria; p__Proteobacteria; c__Alphaproteobacteria; o__Rhizobiales; f__Rhizobiaceae; g__Mesorhizobium
OTU_789	0	0	0	0	0	0	2	0	4	2	0	0	0	0	0	0	0	0	0	0	0	0	0	0	0	0	0	0	0	0	k__Bacteria; p__Bacteroidetes; c__Bacteroidia; o__Bacteroidales
OTU_1225	0	0	0	0	0	0	6	0	0	0	0	0	0	10	0	0	0	3	1	1	2	0	1	1	0	4	0	0	0	0	k__Bacteria; p__Bacteroidetes; c__Bacteroidia; o__Bacteroidales; f__Muribaculaceae; g__uncultured bacterium; s__uncultured bacterium
OTU_995	0	0	0	0	0	0	4	0	0	0	0	0	0	0	0	0	0	0	0	0	0	0	0	0	0	0	0	0	0	0	k__Bacteria; p__Firmicutes; c__Clostridia; o__Clostridiales; f__Lachnospiraceae
OTU_793	0	0	0	0	0	0	2	0	0	0	0	0	0	0	0	0	0	0	0	0	0	0	0	0	0	0	0	0	0	0	k__Bacteria; p__Firmicutes; c__Clostridia; o__Clostridiales; f__Ruminococcaceae
OTU_821	0	0	0	0	0	0	4	6	2	0	4	0	0	0	0	0	0	0	0	0	0	0	0	0	0	0	0	0	1	0	k__Bacteria; p__Bacteroidetes; c__Bacteroidia; o__Bacteroidales; f__Muribaculaceae; g__uncultured bacterium; s__uncultured bacterium
OTU_792	0	0	0	0	0	0	2	0	0	0	0	0	0	0	0	0	0	0	0	0	0	0	0	0	0	0	0	0	0	0	k__Bacteria
OTU_795	0	0	0	0	0	0	3	1	0	0	1	0	0	0	0	0	0	1	1	0	0	0	0	0	0	0	1	0	3	2	k__Bacteria; p__Bacteroidetes; c__Bacteroidia; o__Bacteroidales
OTU_1104	0	0	0	0	0	0	1	0	7	0	1	0	1	0	0	0	0	0	0	0	0	0	0	0	0	28	0	2	0	1	k__Bacteria; p__Firmicutes; c__Clostridia; o__Clostridiales; f__Lachnospiraceae
OTU_445	0	0	0	0	0	0	12	0	0	0	0	0	0	0	0	0	0	0	0	0	0	0	0	0	0	0	0	0	0	0	k__Bacteria; p__Firmicutes; c__Clostridia; o__Clostridiales; f__Ruminococcaceae
OTU_326	0	0	0	0	0	0	1	0	0	0	1	0	0	0	0	0	0	0	0	0	0	0	2	0	0	0	0	0	0	12	k__Bacteria; p__Firmicutes; c__Clostridia; o__Clostridiales; f__Clostridiales vadinBB60 group; g__uncultured bacterium; s__uncultured bacterium
OTU_342	0	0	0	0	0	0	32	2	4	4	5	0	2	0	0	0	0	0	0	0	0	0	1	0	6	1	0	50	0	0	k__Bacteria; p__Firmicutes; c__Clostridia; o__Clostridiales; f__Lachnospiraceae
OTU_816	0	0	0	0	0	0	1	1	4	2	0	0	0	0	0	0	0	0	0	0	0	0	0	0	0	0	0	1	0	0	k__Bacteria; p__Firmicutes; c__Clostridia; o__Clostridiales; f__Lachnospiraceae
OTU_1173	0	0	0	0	0	0	4	7	15	1	0	0	55	0	0	0	0	0	0	0	0	0	0	0	0	0	1	0	1	0	k__Bacteria; p__Firmicutes; c__Clostridia; o__Clostridiales; f__Lachnospiraceae
OTU_1335	0	0	0	0	0	0	2	0	0	0	0	0	0	0	0	0	0	0	0	0	0	0	0	0	0	0	0	0	0	0	k__Bacteria; p__Firmicutes; c__Clostridia; o__Clostridiales; f__Ruminococcaceae
OTU_423	0	0	0	0	0	0	10	3	3	0	0	0	3	1	0	0	0	0	0	2	8	1	0	0	1	3	0	0	1	0	k__Bacteria; p__Firmicutes; c__Clostridia; o__Clostridiales; f__Ruminococcaceae; g__Intestinimonas; s__uncultured bacterium
OTU_1324	0	0	0	0	0	0	2	0	1	0	0	3	0	0	0	0	3	0	0	0	0	0	0	0	0	0	0	0	0	0	k__Bacteria; p__Bacteroidetes; c__Bacteroidia; o__Bacteroidales; f__Muribaculaceae; g__uncultured bacterium; s__uncultured bacterium
OTU_288	0	0	0	0	0	0	3	0	0	0	0	0	0	0	0	3	1	0	0	1	1	0	0	0	5	1	1	2	0	0	k__Bacteria; p__Proteobacteria; c__Alphaproteobacteria; o__Rickettsiales; f__Mitochondria
OTU_825	0	0	0	0	0	0	3	0	8	4	0	0	0	0	0	1	0	0	0	0	0	0	0	0	1	0	0	2	0	5	k__Bacteria; p__Firmicutes; c__Clostridia; o__Clostridiales
OTU_164	0	0	0	0	0	0	3	3	8	14	10	2	28	24	0	0	2	8	3	3	3	1	3	5	1	0	0	0	0	0	k__Bacteria; p__Firmicutes; c__Clostridia; o__Clostridiales; f__Family XIII; g__[Eubacterium] brachy group; s__uncultured bacterium
OTU_1020	0	0	0	0	0	0	2	0	0	0	0	0	0	0	0	0	0	0	0	0	0	0	0	0	0	0	0	0	0	0	k__Bacteria
OTU_629	0	0	0	0	0	0	6	0	3	3	0	0	0	3	0	0	0	0	0	0	0	0	0	0	0	0	0	2	0	1	k__Bacteria; p__Firmicutes; c__Clostridia; o__Clostridiales; f__Clostridiales vadinBB60 group; g__uncultured bacterium; s__uncultured bacterium
OTU_190	0	0	0	0	0	0	9	15	5	6	0	0	0	0	0	60	21	23	3	0	0	0	0	0	0	0	0	0	0	48	k__Bacteria; p__Bacteroidetes; c__Bacteroidia; o__Bacteroidales; f__Muribaculaceae; g__mouse gut metagenome; s__mouse gut metagenome
OTU_416	0	0	0	0	0	0	1	1	94	0	0	0	0	1	0	0	0	0	0	0	0	0	0	0	0	1	0	94	0	0	k__Bacteria; p__Firmicutes; c__Clostridia; o__Clostridiales; f__Lachnospiraceae
OTU_773	0	0	0	0	0	0	16	0	18	29	0	0	0	10	0	0	0	0	0	0	0	0	0	0	0	0	0	24	1	0	k__Bacteria; p__Firmicutes; c__Clostridia; o__Clostridiales; f__Clostridiales vadinBB60 group; g__uncultured bacterium; s__uncultured bacterium
OTU_869	0	0	0	0	0	0	2	0	1	0	0	0	0	0	0	0	0	0	0	0	0	0	0	0	0	0	0	0	0	0	k__Bacteria; p__Firmicutes; c__Clostridia; o__Clostridiales; f__Lachnospiraceae
OTU_577	0	0	0	0	0	0	1	0	8	0	0	0	6	0	0	0	0	0	0	0	0	0	1	1	0	0	1	0	0	1	k__Bacteria; p__Firmicutes; c__Clostridia; o__Clostridiales; f__Ruminococcaceae
OTU_729	0	0	0	0	0	0	5	0	5	3	2	0	8	0	0	0	0	0	0	0	0	0	0	0	0	10	0	0	0	1	k__Bacteria; p__Firmicutes; c__Clostridia; o__Clostridiales; f__Lachnospiraceae
OTU_422	0	0	0	0	0	0	3	2	2	1	0	0	0	0	0	0	0	0	0	0	1	0	0	0	0	0	0	0	0	0	k__Bacteria; p__Cyanobacteria; c__Oxyphotobacteria; o__Chloroplast
OTU_367	0	0	0	0	0	0	2	1	1	2	0	0	1	0	0	0	0	0	0	0	0	0	0	0	0	0	0	28	2	3	k__Bacteria; p__Firmicutes; c__Clostridia; o__Clostridiales; f__Lachnospiraceae; g__uncultured
OTU_1044	0	0	0	0	0	0	2	0	0	4	0	0	3	0	0	1	0	0	0	0	0	0	0	0	0	0	0	0	0	0	k__Bacteria; p__Firmicutes; c__Clostridia; o__Clostridiales; f__Ruminococcaceae; g__Oscillibacter
OTU_1203	0	0	0	0	0	0	2	0	0	0	0	0	0	0	0	0	0	0	0	0	0	0	0	0	0	0	0	0	0	0	k__Bacteria; p__Firmicutes; c__Clostridia; o__Clostridiales; f__Lachnospiraceae; g__uncultured; s__Clostridium sp. Culture-54
OTU_875	0	0	0	0	0	0	4	2	0	0	0	0	0	1	0	0	0	0	0	0	0	0	0	0	0	0	0	0	0	0	k__Bacteria; p__Firmicutes; c__Clostridia; o__Clostridiales; f__Lachnospiraceae
OTU_617	0	0	0	0	0	0	1	2	7	5	0	0	0	0	0	0	0	0	0	0	0	0	0	2	0	3	0	1	0	5	k__Bacteria; p__Firmicutes; c__Clostridia; o__Clostridiales; f__Lachnospiraceae
OTU_1192	0	0	0	0	0	0	2	0	0	0	0	0	0	0	0	0	0	0	0	0	0	0	0	0	0	0	0	0	0	0	k__Bacteria; p__Bacteroidetes; c__Bacteroidia; o__Bacteroidales; f__Muribaculaceae
OTU_846	0	0	0	0	0	0	2	0	0	0	0	0	0	0	0	0	0	0	0	0	0	0	0	0	0	0	0	0	0	0	k__Bacteria; p__Bacteroidetes; c__Bacteroidia; o__Bacteroidales
OTU_753	0	0	0	0	0	0	2	0	0	0	0	0	0	0	0	0	0	0	0	0	0	0	0	0	0	0	0	0	0	0	k__Bacteria; p__Firmicutes; c__Clostridia; o__Clostridiales; f__Ruminococcaceae
OTU_614	0	0	0	0	0	0	1	1	1	3	0	0	0	0	0	0	0	0	0	0	0	0	0	0	0	0	0	0	0	0	k__Bacteria; p__Firmicutes; c__Clostridia; o__Clostridiales; f__Lachnospiraceae; g__uncultured; s__uncultured bacterium
OTU_476	0	0	0	0	0	0	11	0	0	0	4	2	3	16	0	1	0	4	3	6	1	1	1	2	1	3	1	0	0	0	k__Bacteria; p__Bacteroidetes; c__Bacteroidia; o__Bacteroidales; f__Muribaculaceae; g__uncultured bacterium; s__uncultured bacterium
OTU_516	0	0	0	0	0	0	3	0	0	0	0	0	0	0	0	0	0	0	0	0	0	0	0	0	0	0	0	0	0	0	k__Bacteria; p__Bacteroidetes; c__Bacteroidia; o__Bacteroidales
OTU_1286	0	0	0	0	0	0	2	0	0	0	0	0	0	0	0	0	0	0	0	0	0	0	0	0	0	0	0	0	0	0	k__Bacteria; p__Firmicutes; c__Erysipelotrichia; o__Erysipelotrichales; f__Erysipelotrichaceae; g__Dubosiella; s__uncultured Erysipelotrichales bacterium
OTU_538	0	0	0	0	0	0	1	1	1	1	0	0	0	0	0	0	0	0	0	0	0	0	0	0	0	0	0	0	0	0	k__Bacteria; p__Proteobacteria; c__Alphaproteobacteria; o__Acetobacterales; f__Acetobacteraceae
OTU_1182	0	0	0	0	0	0	3	1	0	0	3	2	2	2	0	0	0	1	0	0	3	0	0	0	0	0	0	0	0	0	k__Bacteria; p__Bacteroidetes; c__Bacteroidia; o__Bacteroidales
OTU_845	0	0	0	0	0	0	2	0	0	0	0	0	0	0	0	0	0	0	0	0	0	0	0	0	0	0	0	0	0	0	k__Bacteria; p__Firmicutes; c__Clostridia; o__Clostridiales; f__Ruminococcaceae
OTU_1186	0	0	0	0	0	0	2	0	0	0	0	0	0	0	0	0	0	0	0	0	0	0	0	0	0	0	0	0	0	0	k__Bacteria
OTU_1314	0	0	0	0	0	0	1	0	0	0	0	0	0	2	0	0	0	0	0	0	0	0	0	0	2	0	0	0	0	0	k__Bacteria; p__Firmicutes; c__Clostridia; o__Clostridiales; f__Ruminococcaceae; g__Oscillibacter; s__Oscillibacter sp. 1-3
OTU_1152	0	0	0	0	0	0	1	0	0	0	0	0	0	0	0	2	0	2	0	4	0	2	1	0	1	0	1	0	0	5	k__Bacteria; p__Bacteroidetes; c__Bacteroidia; o__Bacteroidales; f__Muribaculaceae
OTU_368	0	0	0	0	0	0	1	0	0	0	19	0	0	6	0	0	0	0	0	0	0	0	0	0	0	0	0	4	0	0	k__Bacteria; p__Firmicutes; c__Clostridia; o__Clostridiales; f__Lachnospiraceae
OTU_892	0	0	0	0	0	0	2	5	7	0	1	0	12	5	0	0	0	0	0	0	0	0	0	0	9	2	0	2	1	0	k__Bacteria; p__Firmicutes; c__Clostridia; o__Clostridiales; f__Ruminococcaceae; g__Ruminiclostridium 9; s__uncultured bacterium
OTU_906	0	0	0	0	0	0	2	0	0	0	0	0	0	0	0	0	0	0	0	0	0	0	0	0	0	0	0	0	0	0	k__Bacteria; p__Bacteroidetes; c__Bacteroidia; o__Bacteroidales; f__Muribaculaceae; g__uncultured bacterium; s__uncultured bacterium
OTU_1096	0	0	0	0	0	0	1	0	7	2	0	0	1	0	0	0	0	0	0	0	1	0	0	0	7	5	0	8	0	0	k__Bacteria; p__Firmicutes; c__Clostridia; o__Clostridiales; f__Ruminococcaceae; g__Ruminiclostridium 9; s__uncultured bacterium
OTU_412	0	0	0	0	0	0	1	0	2	1	4	0	0	0	0	0	0	0	0	0	0	0	0	3	0	0	0	0	0	0	k__Bacteria; p__Firmicutes; c__Clostridia; o__Clostridiales; f__Ruminococcaceae; g__Butyricicoccus; s__uncultured bacterium
OTU_917	0	0	0	0	0	0	4	1	0	0	0	0	2	0	0	0	0	0	0	0	0	0	0	0	0	0	0	0	0	0	k__Bacteria; p__Firmicutes; c__Clostridia; o__Clostridiales; f__Ruminococcaceae
OTU_330	0	0	0	0	0	0	5	0	0	0	0	0	0	13	0	0	0	0	0	0	0	0	0	0	0	0	0	0	0	0	k__Bacteria; p__Firmicutes; c__Clostridia; o__Clostridiales; f__Ruminococcaceae; g__Butyricicoccus; s__uncultured bacterium
OTU_599	0	0	0	0	0	0	1	0	0	0	0	0	0	7	0	0	0	0	0	0	0	0	0	0	0	0	0	5	0	0	k__Bacteria; p__Firmicutes; c__Clostridia; o__Clostridiales; f__Lachnospiraceae; g__Lachnospiraceae NK4A136 group
OTU_736	0	0	0	0	0	0	2	0	0	0	0	0	2	3	0	0	0	0	0	1	0	0	0	0	1	0	0	0	0	0	k__Bacteria; p__Firmicutes; c__Clostridia; o__Clostridiales; f__Lachnospiraceae
OTU_843	0	0	0	0	0	0	3	0	0	0	0	0	0	0	0	0	0	0	0	0	0	0	0	0	0	0	0	0	0	0	k__Bacteria; p__Firmicutes; c__Clostridia; o__Clostridiales; f__Ruminococcaceae; g__Oscillibacter
OTU_41	0	0	0	0	0	0	2	0	0	0	1	0	0	0	0	952	1158	813	0	0	0	0	0	0	0	0	0	0	0	1	k__Bacteria; p__Epsilonbacteraeota; c__Campylobacteria; o__Campylobacterales; f__Helicobacteraceae; g__Helicobacter
OTU_799	0	0	0	0	0	0	2	0	0	0	0	0	0	0	0	0	0	0	0	0	0	0	0	0	0	0	0	1	0	0	k__Bacteria; p__Bacteroidetes; c__Bacteroidia; o__Bacteroidales; f__Muribaculaceae; g__uncultured bacterium; s__uncultured bacterium
OTU_525	0	0	0	0	0	0	1	0	0	0	0	0	0	0	0	3	0	0	0	0	0	0	0	0	0	0	0	0	0	0	k__Bacteria
OTU_1034	0	0	0	0	0	0	4	0	0	3	0	0	0	0	0	1	0	0	0	0	0	0	0	0	0	0	0	0	0	0	k__Bacteria; p__Firmicutes; c__Erysipelotrichia; o__Erysipelotrichales; f__Erysipelotrichaceae; g__Faecalibaculum
OTU_909	0	0	0	0	0	0	2	0	0	0	0	0	0	0	0	0	0	0	0	0	0	0	0	0	0	0	0	0	0	0	k__Bacteria
OTU_698	0	0	0	0	0	0	2	0	0	0	0	0	0	5	0	2	0	0	1	2	1	1	0	0	4	0	0	0	0	1	k__Bacteria; p__Bacteroidetes; c__Bacteroidia; o__Bacteroidales; f__Muribaculaceae; g__uncultured bacterium; s__uncultured bacterium
OTU_1257	0	0	0	0	0	0	2	0	1	0	0	0	0	0	0	0	0	0	0	0	0	0	0	0	0	0	0	0	0	0	k__Bacteria; p__Firmicutes; c__Clostridia; o__Clostridiales; f__Lachnospiraceae; g__A2; s__uncultured bacterium
OTU_1167	0	0	0	0	0	0	2	0	0	0	0	0	0	0	0	0	0	0	0	0	0	0	0	0	0	0	0	0	0	0	k__Bacteria; p__Bacteroidetes; c__Bacteroidia; o__Bacteroidales; f__Muribaculaceae
OTU_890	0	0	0	0	0	0	4	0	2	3	0	0	0	0	0	0	0	0	0	0	0	0	0	0	0	0	0	1	0	0	k__Bacteria; p__Firmicutes; c__Clostridia; o__Clostridiales; f__Lachnospiraceae
OTU_460	0	0	0	0	0	0	3	0	0	0	0	0	0	0	0	0	0	0	0	0	0	0	0	0	0	0	0	0	0	0	k__Bacteria; p__Firmicutes; c__Clostridia; o__Clostridiales; f__Lachnospiraceae
OTU_1035	0	0	0	0	0	0	3	0	0	0	0	0	0	0	0	0	0	0	0	0	0	0	0	0	0	0	0	0	0	0	k__Bacteria; p__Firmicutes; c__Clostridia; o__Clostridiales; f__Ruminococcaceae
OTU_676	0	0	0	0	0	0	1	2	0	2	0	0	0	0	0	0	0	0	0	0	0	0	0	0	0	0	2	0	0	0	k__Bacteria
OTU_807	0	0	0	0	0	0	3	0	2	1	0	0	0	0	0	0	0	0	0	0	0	0	0	0	0	0	0	0	0	1	k__Bacteria; p__Firmicutes; c__Clostridia; o__Clostridiales; f__Lachnospiraceae
OTU_1251	0	0	0	0	0	0	1	0	0	0	0	0	0	0	0	0	0	0	0	0	0	0	0	0	2	0	0	0	0	0	k__Bacteria; p__Firmicutes; c__Clostridia; o__Clostridiales
OTU_1267	0	0	0	0	0	0	2	0	0	0	0	0	0	0	0	0	0	0	0	0	0	0	0	0	0	0	0	0	0	0	k__Bacteria; p__Firmicutes; c__Clostridia; o__Clostridiales; f__Lachnospiraceae
OTU_1032	0	0	0	0	0	0	3	2	7	2	1	0	0	0	0	0	0	0	0	0	0	0	0	0	0	0	0	1	0	0	k__Bacteria; p__Firmicutes; c__Clostridia; o__Clostridiales
OTU_531	0	0	0	0	0	0	3	0	0	0	0	0	0	0	0	0	0	0	0	0	0	0	0	0	0	0	0	0	0	0	k__Bacteria; p__Firmicutes; c__Clostridia; o__Clostridiales; f__Lachnospiraceae
OTU_1271	0	0	0	0	0	0	1	0	0	0	0	0	0	0	0	0	0	0	0	0	0	0	0	0	0	0	0	2	0	0	k__Bacteria; p__Firmicutes; c__Clostridia; o__Clostridiales
OTU_765	0	0	0	0	0	0	2	0	0	0	0	0	0	0	0	0	0	0	0	0	0	0	0	0	0	0	0	0	0	0	k__Bacteria; p__Bacteroidetes; c__Bacteroidia
OTU_766	0	0	0	0	0	0	2	0	0	0	1	0	0	0	0	0	0	0	0	0	0	0	0	0	0	0	0	0	0	0	k__Bacteria; p__Firmicutes; c__Clostridia; o__Clostridiales; f__Lachnospiraceae; g__GCA-900066575; s__uncultured bacterium
OTU_459	0	0	0	0	0	0	3	0	1	0	2	0	2	0	0	0	0	0	0	0	0	0	1	0	0	0	0	0	0	0	k__Bacteria; p__Bacteroidetes; c__Bacteroidia; o__Bacteroidales; f__Muribaculaceae; g__uncultured bacterium; s__uncultured bacterium
OTU_461	0	0	0	0	0	0	3	0	0	0	0	0	0	0	0	0	0	0	0	0	0	0	0	0	0	0	0	0	0	0	k__Bacteria; p__Firmicutes; c__Clostridia; o__Clostridiales; f__Ruminococcaceae
OTU_935	0	0	0	0	0	0	1	0	0	1	3	0	0	0	0	1	0	0	0	0	0	1	1	0	0	0	0	0	0	0	k__Bacteria; p__Bacteroidetes; c__Bacteroidia; o__Bacteroidales; f__Muribaculaceae; g__uncultured bacterium; s__uncultured bacterium
OTU_781	0	0	0	0	0	0	2	0	0	0	0	0	0	0	0	0	0	0	0	0	0	0	0	0	0	0	0	0	0	0	k__Bacteria; p__Firmicutes; c__Clostridia; o__Clostridiales; f__Lachnospiraceae
OTU_914	0	0	0	0	0	0	1	4	0	1	0	0	5	0	0	0	0	0	0	0	0	0	0	0	0	0	0	0	0	2	k__Bacteria; p__Firmicutes; c__Clostridia; o__Clostridiales; f__Lachnospiraceae
OTU_1325	0	0	0	0	0	0	2	0	0	0	0	0	0	0	0	0	0	0	0	0	0	0	0	0	0	0	0	0	0	0	k__Bacteria; p__Firmicutes; c__Clostridia; o__Clostridiales
OTU_996	0	0	0	0	0	0	2	0	0	0	0	0	0	0	0	0	0	0	0	0	0	0	0	0	0	0	0	0	0	0	k__Bacteria; p__Firmicutes; c__Clostridia; o__Clostridiales; f__Lachnospiraceae
OTU_997	0	0	0	0	0	0	2	0	0	0	0	0	0	0	0	0	0	0	0	0	0	0	0	0	0	0	0	0	0	0	k__Bacteria
OTU_937	0	0	0	0	0	0	1	0	0	0	0	0	0	2	0	0	0	0	0	0	0	0	0	0	0	0	0	0	0	0	k__Bacteria; p__Firmicutes; c__Clostridia; o__Clostridiales; f__Lachnospiraceae
OTU_779	0	0	0	0	0	0	2	0	0	0	0	0	0	0	0	0	0	0	0	0	0	0	0	0	0	0	0	0	0	0	k__Bacteria; p__Bacteroidetes; c__Bacteroidia; o__Bacteroidales; f__Muribaculaceae; g__uncultured bacterium; s__uncultured bacterium
OTU_539	0	0	0	0	0	0	2	0	3	0	0	0	0	0	0	0	0	0	0	0	0	0	0	0	0	0	0	3	0	0	k__Bacteria
OTU_706	0	0	0	0	0	0	1	0	13	0	5	0	0	0	0	0	0	0	0	0	0	0	1	0	3	4	0	5	0	0	k__Bacteria; p__Firmicutes; c__Clostridia; o__Clostridiales; f__Lachnospiraceae
OTU_780	0	0	0	0	0	0	2	0	0	0	0	0	0	0	0	0	0	0	0	0	0	0	0	0	0	0	0	0	0	0	k__Bacteria; p__Firmicutes; c__Clostridia; o__Clostridiales; f__Lachnospiraceae
OTU_451	0	0	0	0	0	0	1	5	1	1	0	0	0	0	0	0	0	0	0	0	0	0	0	0	0	0	0	0	0	0	k__Bacteria; p__Proteobacteria; c__Alphaproteobacteria; o__Rhizobiales; f__Beijerinckiaceae
OTU_635	0	0	0	0	0	0	1	0	0	0	0	0	0	0	0	0	0	0	0	0	2	1	1	0	0	0	0	0	0	0	k__Bacteria; p__Bacteroidetes; c__Bacteroidia; o__Bacteroidales; f__Muribaculaceae
OTU_916	0	0	0	0	0	0	3	0	0	0	0	0	0	0	0	0	0	0	0	0	0	0	0	0	0	0	0	0	0	0	k__Bacteria; p__Firmicutes; c__Clostridia; o__Clostridiales; f__Lachnospiraceae
OTU_811	0	0	0	0	0	0	5	2	0	0	0	0	0	1	0	0	0	0	0	0	0	0	0	0	1	0	0	0	0	0	k__Bacteria; p__Firmicutes; c__Clostridia; o__Clostridiales; f__Ruminococcaceae
OTU_918	0	0	0	0	0	0	2	2	0	0	0	0	1	0	0	0	0	0	0	0	0	0	0	0	0	1	0	0	0	0	k__Bacteria
OTU_541	0	0	0	0	0	0	1	0	0	0	0	0	0	0	0	0	3	0	0	0	0	0	0	0	0	0	0	0	0	0	k__Bacteria; p__Bacteroidetes; c__Bacteroidia; o__Bacteroidales; f__Muribaculaceae; g__uncultured bacterium; s__uncultured bacterium
OTU_1024	0	0	0	0	0	0	2	0	0	0	0	0	0	0	0	0	0	0	0	0	0	0	0	0	0	0	0	0	0	0	k__Bacteria; p__Bacteroidetes; c__Bacteroidia; o__Bacteroidales; f__Rikenellaceae; g__Alistipes
OTU_915	0	0	0	0	0	0	2	0	1	2	0	0	0	0	0	0	0	0	0	0	0	0	0	0	0	0	0	1	0	0	k__Bacteria; p__Firmicutes; c__Clostridia; o__Clostridiales; f__Lachnospiraceae
OTU_768	0	0	0	0	0	0	2	0	0	0	0	0	0	0	0	0	0	0	0	0	0	0	0	0	0	0	0	0	0	0	k__Bacteria; p__Firmicutes; c__Clostridia; o__Clostridiales; f__Ruminococcaceae
OTU_782	0	0	0	0	0	0	2	0	0	0	0	0	2	2	0	1	0	0	0	0	0	1	0	0	1	0	0	0	0	0	k__Bacteria; p__Bacteroidetes; c__Bacteroidia; o__Bacteroidales; f__Muribaculaceae; g__uncultured bacterium; s__uncultured bacterium
OTU_911	0	0	0	0	0	0	1	0	0	0	0	0	0	1	0	0	0	0	0	0	0	0	0	3	1	0	0	0	0	0	k__Bacteria; p__Bacteroidetes; c__Bacteroidia; o__Bacteroidales; f__Muribaculaceae; g__uncultured bacterium; s__uncultured bacterium
OTU_1234	0	0	0	0	0	0	2	0	0	0	0	0	0	0	0	0	0	0	0	0	0	0	0	0	0	0	0	0	0	0	k__Bacteria; p__Firmicutes; c__Clostridia; o__Clostridiales; f__Lachnospiraceae
OTU_1233	0	0	0	0	0	0	2	0	0	0	0	0	0	0	0	0	0	0	0	0	0	0	0	0	1	0	0	1	0	0	k__Bacteria; p__Firmicutes; c__Clostridia; o__Clostridiales; f__Ruminococcaceae
OTU_646	0	0	0	0	0	0	1	0	0	0	2	0	0	0	0	0	0	0	0	0	0	0	0	0	2	0	0	0	0	0	k__Bacteria; p__Firmicutes; c__Clostridia; o__Clostridiales
OTU_919	0	0	0	0	0	0	2	0	0	0	0	0	0	0	0	0	0	0	0	0	0	0	0	0	0	0	0	0	0	0	k__Bacteria; p__Firmicutes; c__Clostridia; o__Clostridiales; f__Lachnospiraceae
OTU_1175	0	0	0	0	0	0	1	0	0	0	0	0	0	0	0	0	0	0	0	0	0	0	0	1	0	0	1	0	2	0	k__Bacteria; p__Bacteroidetes; c__Bacteroidia; o__Bacteroidales; f__Muribaculaceae; g__uncultured bacterium; s__uncultured bacterium
OTU_1317	0	0	0	0	0	0	2	0	0	0	0	0	0	0	0	0	0	0	0	0	0	0	0	0	0	0	0	0	0	0	k__Bacteria; p__Firmicutes; c__Clostridia; o__Clostridiales; f__Ruminococcaceae; g__uncultured
OTU_810	0	0	0	0	0	0	2	1	0	1	0	0	0	0	0	0	0	0	0	0	0	0	0	0	0	0	0	0	0	0	k__Bacteria
OTU_1161	0	0	0	0	0	0	1	0	1	1	0	0	0	0	0	0	0	0	0	0	0	0	0	0	0	0	0	0	0	0	k__Bacteria; p__Firmicutes; c__Clostridia; o__Clostridiales; f__Family XI; g__Finegoldia; s__uncultured bacterium
OTU_974	0	0	0	0	0	0	1	3	0	0	3	1	4	0	0	3	0	0	1	6	0	1	0	5	1	2	0	0	8	0	k__Bacteria; p__Bacteroidetes; c__Bacteroidia; o__Bacteroidales; f__Muribaculaceae; g__uncultured bacterium; s__uncultured bacterium
OTU_536	0	0	0	0	0	0	3	0	0	0	0	0	0	0	0	0	0	0	0	0	0	0	0	0	0	0	0	0	0	0	k__Bacteria; p__Bacteroidetes; c__Bacteroidia; o__Bacteroidales; f__Muribaculaceae; g__uncultured bacterium; s__uncultured bacterium
OTU_561	0	0	0	0	0	0	1	0	0	0	0	0	0	4	0	0	0	0	0	0	0	0	0	0	0	0	0	0	0	0	k__Bacteria; p__Firmicutes; c__Clostridia; o__Clostridiales; f__Ruminococcaceae
OTU_1316	0	0	0	0	0	0	2	0	0	0	0	0	0	0	0	0	0	0	0	0	0	0	0	0	0	0	0	0	0	0	k__Bacteria
OTU_939	0	0	0	0	0	0	1	0	1	0	0	3	2	0	0	0	0	0	0	0	0	0	0	4	1	0	0	0	0	1	k__Bacteria; p__Firmicutes; c__Clostridia; o__Clostridiales; f__Lachnospiraceae
OTU_1098	0	0	0	0	0	0	0	1	0	0	0	0	0	0	0	0	0	0	0	0	0	0	0	0	0	7	0	0	0	0	k__Bacteria; p__Firmicutes; c__Clostridia; o__Clostridiales; f__Lachnospiraceae; g__Blautia; s__Lachnospiraceae bacterium 28-4
OTU_207	0	0	0	0	0	0	0	30	19	17	0	0	0	0	0	0	0	0	0	0	0	0	0	0	0	0	0	0	0	0	k__Bacteria; p__Firmicutes; c__Clostridia; o__Clostridiales; f__Ruminococcaceae; g__Ruminococcaceae UCG-014; s__uncultured bacterium
OTU_176	0	0	0	0	0	0	0	20	2	4	0	0	0	65	0	0	0	1	0	0	3	2	13	0	0	0	1	15	3	0	k__Bacteria; p__Firmicutes; c__Clostridia; o__Clostridiales; f__Lachnospiraceae; g__Lachnospiraceae NK4A136 group; s__uncultured bacterium
OTU_710	0	0	0	0	0	0	0	1	4	1	1	0	0	0	0	0	0	0	0	0	0	0	0	0	0	0	0	1	1	0	k__Bacteria; p__Firmicutes; c__Clostridia; o__Clostridiales
OTU_157	0	0	0	0	0	0	0	12	2	8	2	4	65	7	0	0	0	0	0	0	3	0	2	11	10	0	2	29	1	0	k__Bacteria; p__Firmicutes; c__Clostridia; o__Clostridiales; f__Ruminococcaceae; g__Anaerotruncus; s__uncultured bacterium
OTU_657	0	0	0	0	0	0	0	7	7	2	0	0	0	0	0	0	0	0	0	0	0	0	0	0	0	0	0	0	0	0	k__Bacteria; p__Firmicutes; c__Clostridia; o__Clostridiales; f__Lachnospiraceae; g__Lachnospiraceae NK4A136 group
OTU_775	0	0	0	0	0	0	0	2	0	0	0	0	0	0	0	0	0	0	0	0	0	0	1	0	0	0	0	0	0	0	k__Bacteria
OTU_1195	0	0	0	0	0	0	0	2	0	0	0	0	0	0	0	0	0	0	0	0	0	0	0	0	0	0	0	0	0	0	k__Bacteria
OTU_1224	0	0	0	0	0	0	0	5	0	0	0	0	0	0	0	0	0	0	0	0	0	0	0	0	0	0	0	0	0	0	k__Bacteria; p__Firmicutes; c__Clostridia; o__Clostridiales; f__Lachnospiraceae
OTU_776	0	0	0	0	0	0	0	2	0	0	0	0	0	0	0	0	0	0	0	0	0	0	0	0	0	0	0	0	0	0	k__Bacteria; p__Firmicutes; c__Erysipelotrichia; o__Erysipelotrichales; f__Erysipelotrichaceae; g__Dubosiella
OTU_376	0	0	0	0	0	0	0	5	1	2	0	0	0	0	0	0	0	0	0	0	0	0	0	0	0	0	0	0	0	0	k__Bacteria; p__Firmicutes; c__Clostridia; o__Clostridiales; f__Family XIII
OTU_945	0	0	0	0	0	0	0	1	0	1	0	0	0	0	0	0	0	0	0	0	0	0	0	0	0	1	0	2	1	0	k__Bacteria; p__Firmicutes; c__Clostridia; o__Clostridiales; f__Peptococcaceae; g__Peptococcus
OTU_812	0	0	0	0	0	0	0	3	0	0	0	0	0	0	0	0	0	0	0	0	0	0	0	0	0	0	1	0	0	0	k__Bacteria; p__Actinobacteria; c__Coriobacteriia; o__Coriobacteriales; f__Atopobiaceae; g__Coriobacteriaceae UCG-002; s__uncultured bacterium
OTU_860	0	0	0	0	0	0	0	2	0	0	0	0	0	0	0	0	0	0	0	0	0	0	0	0	0	0	0	0	0	0	k__Bacteria; p__Firmicutes; c__Clostridia; o__Clostridiales
OTU_1155	0	0	0	0	0	0	0	2	0	0	0	0	0	0	0	0	0	0	0	0	0	0	0	0	0	0	0	0	0	0	k__Bacteria; p__Firmicutes; c__Clostridia; o__Clostridiales
OTU_785	0	0	0	0	0	0	0	2	0	0	0	0	0	0	0	0	0	0	0	0	0	0	0	0	0	0	0	0	0	0	k__Bacteria; p__Chloroflexi; c__AD3; o__uncultured bacterium; f__uncultured bacterium; g__uncultured bacterium; s__uncultured bacterium
OTU_1201	0	0	0	0	0	0	0	1	0	1	0	0	0	3	0	0	0	0	0	0	0	0	0	0	0	0	0	3	0	0	k__Bacteria; p__Firmicutes; c__Clostridia; o__Clostridiales
OTU_406	0	0	0	0	0	0	0	4	0	0	0	0	0	0	0	0	0	0	0	0	0	0	0	0	0	0	0	0	0	0	k__Bacteria; p__Firmicutes; c__Clostridia; o__Clostridiales
OTU_1038	0	0	0	0	0	0	0	2	7	1	0	0	0	0	0	0	0	0	0	0	0	0	0	0	0	0	0	0	0	0	k__Bacteria; p__Firmicutes; c__Clostridia; o__Clostridiales; f__Lachnospiraceae
OTU_1278	0	0	0	0	0	0	0	2	3	0	0	0	0	0	0	0	0	0	0	0	0	0	0	0	0	0	0	0	0	0	k__Bacteria; p__Actinobacteria; c__Coriobacteriia; o__Coriobacteriales; f__Eggerthellaceae; g__Enterorhabdus; s__uncultured bacterium
OTU_814	0	0	0	0	0	0	0	2	0	0	0	0	0	0	0	0	0	0	0	0	0	0	0	0	0	0	0	0	0	0	k__Bacteria; p__Actinobacteria; c__Thermoleophilia; o__Gaiellales; f__uncultured
OTU_221	0	0	0	0	0	0	0	3	2	1	0	0	0	4	0	0	0	1	0	0	5	0	0	0	0	0	5	14	4	5	k__Bacteria; p__Firmicutes; c__Clostridia; o__Clostridiales; f__Lachnospiraceae
OTU_554	0	0	0	0	0	0	0	2	0	0	0	0	0	0	0	0	1	0	0	0	0	0	0	0	0	0	0	2	1	0	k__Bacteria; p__Proteobacteria; c__Alphaproteobacteria; o__Acetobacterales; f__Acetobacteraceae; g__Acetobacter; s__Acetobacter pasteurianus
OTU_192	0	0	0	0	0	0	0	1	12	4	15	9	104	1	0	0	0	1	0	0	0	0	0	0	0	0	1	1	0	2	k__Bacteria; p__Firmicutes; c__Clostridia; o__Clostridiales; f__Lachnospiraceae; g__Lachnospiraceae NK4A136 group; s__uncultured bacterium
OTU_263	0	0	0	0	0	0	0	2	7	3	0	0	0	1	0	0	0	0	0	0	2	0	6	0	0	0	3	13	0	0	k__Bacteria; p__Firmicutes; c__Clostridia; o__Clostridiales; f__Lachnospiraceae
OTU_908	0	0	0	0	0	0	0	2	0	0	0	0	0	2	0	3	2	0	0	1	0	0	0	6	1	0	0	0	1	0	k__Bacteria; p__Bacteroidetes; c__Bacteroidia; o__Bacteroidales; f__Muribaculaceae; g__uncultured bacterium; s__uncultured bacterium
OTU_809	0	0	0	0	0	0	0	3	1	0	0	0	0	0	0	0	0	0	2	0	0	0	0	0	0	0	0	0	0	0	k__Bacteria; p__Firmicutes; c__Erysipelotrichia; o__Erysipelotrichales; f__Erysipelotrichaceae; g__Dubosiella
OTU_999	0	0	0	0	0	0	0	1	2	1	9	0	4	0	0	0	0	0	0	0	1	0	0	1	1	0	0	1	0	0	k__Bacteria; p__Firmicutes; c__Clostridia; o__Clostridiales; f__Lachnospiraceae
OTU_218	0	0	0	0	0	0	0	2	0	1	2	0	0	0	0	0	0	1	0	0	2	2	5	34	10	4	0	6	0	30	k__Bacteria; p__Firmicutes; c__Clostridia; o__Clostridiales; f__Lachnospiraceae; g__uncultured; s__uncultured bacterium
OTU_1205	0	0	0	0	0	0	0	2	0	0	0	0	0	0	0	0	0	0	0	0	0	0	0	0	0	0	0	0	0	0	k__Bacteria; p__Bacteroidetes; c__Bacteroidia; o__Bacteroidales
OTU_805	0	0	0	0	0	0	0	1	5	2	0	0	0	0	0	0	0	0	0	0	1	0	0	0	0	0	0	0	0	0	k__Bacteria; p__Firmicutes; c__Clostridia; o__Clostridiales; f__Lachnospiraceae; g__Lachnospiraceae NK4A136 group
OTU_861	0	0	0	0	0	0	0	2	0	0	0	0	0	0	0	0	0	0	0	0	0	0	0	0	0	0	0	0	0	0	k__Bacteria
OTU_413	0	0	0	0	0	0	0	2	15	10	0	0	0	0	0	0	0	0	0	0	0	0	0	0	0	0	2	4	2	0	k__Bacteria; p__Firmicutes; c__Clostridia; o__Clostridiales; f__Lachnospiraceae; g__uncultured; s__uncultured bacterium
OTU_913	0	0	0	0	0	0	0	3	1	0	0	0	0	0	0	0	0	0	0	0	0	0	0	0	0	0	0	0	0	0	k__Bacteria; p__Firmicutes; c__Clostridia; o__Clostridiales; f__Lachnospiraceae; g__uncultured
OTU_573	0	0	0	0	0	0	0	1	3	6	4	0	57	0	0	0	0	0	0	0	0	0	0	0	0	4	0	0	0	0	k__Bacteria; p__Firmicutes; c__Clostridia; o__Clostridiales; f__Lachnospiraceae
OTU_859	0	0	0	0	0	0	0	2	0	0	0	0	0	0	0	0	0	0	0	0	0	0	0	0	0	0	0	0	0	0	k__Bacteria; p__Firmicutes; c__Clostridia; o__Clostridiales; f__Ruminococcaceae
OTU_609	0	0	0	0	0	0	0	1	0	0	0	0	0	0	0	0	0	0	0	2	0	0	1	0	0	0	0	0	0	0	k__Bacteria; p__Firmicutes; c__Erysipelotrichia; o__Erysipelotrichales; f__Erysipelotrichaceae; g__Dubosiella
OTU_940	0	0	0	0	0	0	0	1	1	0	0	0	3	0	0	2	0	0	0	1	0	0	0	2	1	0	0	1	0	0	k__Bacteria; p__Firmicutes; c__Clostridia; o__Clostridiales; f__Ruminococcaceae
OTU_514	0	0	0	0	0	0	0	3	0	0	0	0	0	0	0	0	0	0	0	0	0	0	0	0	0	0	0	1	0	0	k__Bacteria; p__Firmicutes; c__Clostridia; o__Clostridiales; f__Lachnospiraceae
OTU_508	0	0	0	0	0	0	0	3	0	1	0	0	0	0	0	0	0	0	0	2	1	1	0	2	0	0	2	0	4	0	k__Bacteria; p__Bacteroidetes; c__Bacteroidia; o__Bacteroidales
OTU_1260	0	0	0	0	0	0	0	1	0	0	0	0	0	0	0	0	0	0	0	0	0	1	0	0	0	0	0	2	0	0	k__Bacteria; p__Firmicutes; c__Erysipelotrichia; o__Erysipelotrichales; f__Erysipelotrichaceae; g__Dubosiella
OTU_1245	0	0	0	0	0	0	0	1	0	0	0	0	0	0	0	0	0	1	0	0	0	0	3	0	0	0	0	0	0	1	k__Bacteria; p__Firmicutes; c__Erysipelotrichia; o__Erysipelotrichales; f__Erysipelotrichaceae; g__Dubosiella; s__uncultured Erysipelotrichales bacterium
OTU_244	0	0	0	0	0	0	0	0	12	3	0	0	0	0	0	0	0	0	0	0	0	0	0	0	0	48	0	0	0	0	k__Bacteria; p__Firmicutes; c__Clostridia; o__Clostridiales; f__Lachnospiraceae
OTU_392	0	0	0	0	0	0	0	0	7	2	0	1	0	1	0	0	2	0	3	8	1	1	8	10	0	1	1	1	0	0	k__Bacteria; p__Bacteroidetes; c__Bacteroidia; o__Bacteroidales; f__Bacteroidaceae; g__Bacteroides
OTU_1004	0	0	0	0	0	0	0	0	3	0	0	2	0	0	0	0	0	0	0	0	0	0	0	0	0	0	0	0	0	0	k__Bacteria; p__Bacteroidetes; c__Bacteroidia; o__Bacteroidales; f__Bacteroidaceae; g__Bacteroides
OTU_512	0	0	0	0	0	0	0	0	4	0	0	0	0	0	0	0	0	0	0	0	0	0	0	0	0	0	0	0	0	0	k__Bacteria
OTU_320	0	0	0	0	0	0	0	0	8	0	0	0	9	0	0	0	0	0	0	0	0	0	0	0	0	0	0	0	0	0	k__Bacteria; p__Firmicutes; c__Bacilli; o__Lactobacillales; f__Lactobacillaceae; g__Lactobacillus
OTU_806	0	0	0	0	0	0	0	0	2	0	0	0	0	0	0	0	0	0	0	0	0	0	0	0	0	0	0	0	0	0	k__Bacteria; p__Actinobacteria; c__Coriobacteriia; o__Coriobacteriales; f__Eggerthellaceae; g__Enterorhabdus; s__Enterorhabdus caecimuris B7
OTU_478	0	0	0	0	0	0	0	0	1	0	0	0	0	0	0	0	0	0	4	0	0	1	2	1	0	0	0	0	0	0	k__Bacteria; p__Firmicutes; c__Erysipelotrichia; o__Erysipelotrichales; f__Erysipelotrichaceae; g__Turicibacter; s__uncultured bacterium
OTU_661	0	0	0	0	0	0	0	0	2	0	0	0	0	0	0	0	0	0	0	0	0	0	0	0	0	0	0	0	0	0	k__Bacteria; p__Firmicutes; c__Clostridia; o__Clostridiales; f__Lachnospiraceae
OTU_865	0	0	0	0	0	0	0	0	3	2	0	0	0	0	0	0	0	0	0	0	0	0	0	0	0	0	0	0	0	0	k__Bacteria; p__Firmicutes; c__Clostridia; o__Clostridiales
OTU_206	0	0	0	0	0	0	0	0	2	0	0	0	0	0	1	38	26	0	1	1	0	0	0	0	0	0	0	0	0	5	k__Bacteria; p__Bacteroidetes; c__Bacteroidia; o__Bacteroidales; f__Bacteroidaceae; g__Bacteroides; s__Bacteroides fragilis
OTU_415	0	0	0	0	0	0	0	0	3	2	0	0	0	0	0	0	0	0	0	0	0	0	0	34	0	4	0	0	0	0	k__Bacteria; p__Firmicutes; c__Clostridia; o__Clostridiales; f__Lachnospiraceae; g__Lachnospiraceae NK4A136 group; s__uncultured bacterium
OTU_1041	0	0	0	0	0	0	0	0	4	1	0	0	0	0	0	0	0	0	0	0	0	0	0	0	0	0	0	2	0	0	k__Bacteria; p__Firmicutes; c__Clostridia; o__Clostridiales; f__Lachnospiraceae; g__Blautia; s__Lachnospiraceae bacterium 28-4
OTU_152	0	0	0	0	0	0	0	0	2	0	0	0	0	1	0	22	1	0	37	31	0	0	12	23	1	0	0	1	0	2	k__Bacteria; p__Firmicutes; c__Negativicutes; o__Selenomonadales; f__Acidaminococcaceae; g__Phascolarctobacterium; s__uncultured organism
OTU_1073	0	0	0	0	0	0	0	0	1	0	0	0	0	1	0	0	0	0	0	0	0	0	0	0	0	0	0	0	0	1	k__Bacteria; p__Bacteroidetes; c__Bacteroidia; o__Bacteroidales; f__Muribaculaceae; g__uncultured bacterium; s__uncultured bacterium
OTU_1240	0	0	0	0	0	0	0	0	8	0	0	0	1	0	0	0	0	0	0	0	2	0	0	0	1	2	0	0	0	0	k__Bacteria; p__Firmicutes; c__Clostridia; o__Clostridiales; f__Lachnospiraceae; g__Blautia; s__Lachnospiraceae bacterium 28-4
OTU_889	0	0	0	0	0	0	0	0	1	0	3	0	0	0	0	0	0	0	0	0	0	0	0	0	0	0	0	0	0	0	k__Bacteria
OTU_868	0	0	0	0	0	0	0	0	4	1	2	0	0	0	0	0	0	0	0	0	0	0	0	1	1	0	0	0	0	0	k__Bacteria; p__Firmicutes; c__Clostridia; o__Clostridiales; f__Lachnospiraceae
OTU_1006	0	0	0	0	0	0	0	0	9	0	0	0	1	0	0	0	0	0	0	0	0	0	0	0	0	0	0	0	0	2	k__Bacteria; p__Firmicutes; c__Clostridia; o__Clostridiales; f__Lachnospiraceae
OTU_656	0	0	0	0	0	0	0	0	2	0	0	0	0	0	0	0	0	0	0	0	0	0	0	0	0	0	0	0	0	0	k__Bacteria; p__Bacteroidetes; c__Bacteroidia; o__Bacteroidales
OTU_818	0	0	0	0	0	0	0	0	2	4	0	0	2	0	0	0	0	0	0	0	0	0	0	0	1	2	0	0	0	0	k__Bacteria; p__Firmicutes; c__Clostridia; o__Clostridiales; f__Lachnospiraceae
OTU_575	0	0	0	0	0	0	0	0	3	3	0	0	0	0	0	0	0	0	0	0	0	0	1	0	0	0	0	0	0	0	k__Bacteria; p__Firmicutes; c__Clostridia; o__Clostridiales; f__Lachnospiraceae
OTU_804	0	0	0	0	0	0	0	0	2	0	0	0	0	0	0	0	0	0	0	0	0	0	0	0	0	0	0	0	0	0	k__Bacteria; p__Actinobacteria; c__Coriobacteriia; o__Coriobacteriales; f__Eggerthellaceae; g__Eggerthella; s__uncultured bacterium
OTU_905	0	0	0	0	0	0	0	0	1	0	0	0	0	0	0	0	0	0	0	0	4	3	2	0	0	0	0	0	0	0	k__Bacteria; p__Bacteroidetes; c__Bacteroidia; o__Bacteroidales; f__Muribaculaceae; g__uncultured bacterium; s__uncultured bacterium
OTU_867	0	0	0	0	0	0	0	0	2	0	1	0	0	0	0	0	0	0	0	0	0	0	0	0	1	0	0	0	0	0	k__Bacteria; p__Firmicutes; c__Clostridia; o__Clostridiales; f__Lachnospiraceae; g__uncultured
OTU_1297	0	0	0	0	0	0	0	0	1	2	0	0	0	0	0	0	2	0	0	0	0	0	0	0	1	0	0	0	0	0	k__Bacteria; p__Bacteroidetes; c__Bacteroidia; o__Bacteroidales; f__Muribaculaceae; g__uncultured bacterium; s__uncultured bacterium
OTU_701	0	0	0	0	0	0	0	0	2	0	0	0	0	0	0	0	0	0	0	0	0	0	0	0	0	0	0	0	0	0	k__Bacteria; p__Firmicutes; c__Erysipelotrichia; o__Erysipelotrichales; f__Erysipelotrichaceae; g__Dubosiella; s__uncultured bacterium
OTU_1229	0	0	0	0	0	0	0	0	3	0	0	0	0	0	0	0	0	0	0	0	0	0	0	0	0	0	0	0	0	0	k__Bacteria; p__Firmicutes; c__Clostridia; o__Clostridiales; f__Lachnospiraceae
OTU_526	0	0	0	0	0	0	0	0	1	8	1	0	0	0	0	0	0	0	0	0	0	0	0	0	0	4	0	0	0	0	k__Bacteria; p__Firmicutes; c__Clostridia; o__Clostridiales; f__Lachnospiraceae
OTU_827	0	0	0	0	0	0	0	0	2	0	7	0	0	0	0	0	0	2	0	4	0	0	2	8	1	0	4	0	2	0	k__Bacteria; p__Bacteroidetes; c__Bacteroidia; o__Bacteroidales; f__Muribaculaceae; g__uncultured bacterium; s__uncultured bacterium
OTU_1329	0	0	0	0	0	0	0	0	3	1	0	0	0	0	0	0	0	0	0	0	0	0	0	1	0	0	0	0	0	0	k__Bacteria; p__Firmicutes; c__Clostridia; o__Clostridiales; f__Lachnospiraceae; g__uncultured; s__uncultured bacterium
OTU_323	0	0	0	0	0	0	0	0	4	9	0	0	0	0	0	0	0	0	0	0	0	0	0	0	0	0	0	0	0	0	k__Bacteria; p__Bacteroidetes; c__Bacteroidia; o__Bacteroidales; f__Prevotellaceae; g__Prevotella 6; s__unidentified
OTU_295	0	0	0	0	0	0	0	0	2	18	0	0	0	0	0	0	0	0	0	0	0	0	0	0	0	0	0	0	0	0	k__Bacteria; p__Actinobacteria; c__Coriobacteriia; o__Coriobacteriales; f__Atopobiaceae; g__Atopobium; s__Atopobium sp. oral taxon 810 str. F0209
OTU_507	0	0	0	0	0	0	0	0	1	2	0	0	1	0	0	0	0	0	0	0	0	0	0	0	1	0	0	0	0	0	k__Bacteria; p__Firmicutes; c__Clostridia; o__Clostridiales; f__Family XI; g__Peptoniphilus; s__uncultured bacterium
OTU_696	0	0	0	0	0	0	0	0	2	1	1	0	0	0	0	0	0	0	0	0	0	0	0	0	1	0	0	4	0	2	k__Bacteria; p__Firmicutes; c__Clostridia; o__Clostridiales
OTU_1301	0	0	0	0	0	0	0	0	3	0	0	0	0	0	0	0	0	0	0	0	1	0	0	0	0	0	0	0	0	0	k__Bacteria
OTU_824	0	0	0	0	0	0	0	0	2	0	0	0	0	0	0	0	0	0	0	0	0	0	0	0	0	0	0	0	0	0	k__Bacteria; p__Firmicutes; c__Clostridia; o__Clostridiales
OTU_723	0	0	0	0	0	0	0	0	2	0	0	0	1	0	0	0	0	0	0	0	0	0	0	3	27	6	0	0	0	7	k__Bacteria; p__Firmicutes; c__Clostridia; o__Clostridiales; f__Lachnospiraceae; g__Blautia; s__Lachnospiraceae bacterium 28-4
OTU_704	0	0	0	0	0	0	0	0	2	0	0	0	0	0	0	0	0	0	0	0	0	0	0	0	0	0	0	0	0	0	k__Bacteria; p__Bacteroidetes; c__Bacteroidia; o__Bacteroidales; f__Bacteroidaceae; g__Bacteroides
OTU_1300	0	0	0	0	0	0	0	0	2	0	0	0	0	0	0	0	0	0	0	0	0	0	0	0	0	0	0	0	0	0	k__Bacteria; p__Firmicutes; c__Clostridia; o__Clostridiales
OTU_630	0	0	0	0	0	0	0	0	2	0	1	0	0	0	0	0	0	0	0	0	0	0	0	0	0	0	0	0	0	0	k__Bacteria; p__Firmicutes; c__Clostridia; o__Clostridiales; f__Lachnospiraceae
OTU_1040	0	0	0	0	0	0	0	0	1	0	0	0	0	0	1	0	0	0	0	0	0	0	0	0	0	0	0	0	0	0	k__Bacteria; p__Bacteroidetes; c__Bacteroidia; o__Bacteroidales; f__Marinifilaceae; g__Odoribacter; s__uncultured bacterium
OTU_1039	0	0	0	0	0	0	0	0	1	2	0	0	0	0	0	0	0	0	0	0	0	0	0	0	0	0	0	0	0	0	k__Bacteria; p__Firmicutes; c__Clostridia; o__Clostridiales; f__Lachnospiraceae
OTU_904	0	0	0	0	0	0	0	0	1	2	0	0	0	0	0	0	0	0	0	0	0	0	0	0	0	0	0	0	0	0	k__Bacteria; p__Firmicutes; c__Clostridia; o__Clostridiales; f__Lachnospiraceae; g__[Eubacterium] oxidoreducens group; s__uncultured bacterium
OTU_895	0	0	0	0	0	0	0	0	2	0	0	0	0	0	0	0	0	0	0	0	0	0	0	0	0	0	0	0	0	0	k__Bacteria; p__Bacteroidetes; c__Bacteroidia; o__Bacteroidales; f__Muribaculaceae
OTU_1207	0	0	0	0	0	0	0	0	2	0	0	0	0	0	0	0	0	0	0	0	0	0	0	0	0	0	0	0	0	0	k__Bacteria; p__Firmicutes; c__Clostridia; o__Clostridiales; f__Lachnospiraceae
OTU_587	0	0	0	0	0	0	0	0	3	0	0	0	0	0	0	0	0	0	0	0	0	0	0	0	0	0	0	0	0	0	k__Bacteria; p__Firmicutes; c__Clostridia; o__Clostridiales; f__Ruminococcaceae; g__Ruminococcaceae UCG-014
OTU_1200	0	0	0	0	0	0	0	0	2	0	0	0	0	0	0	0	0	0	0	0	0	0	0	0	0	0	0	0	0	0	k__Bacteria; p__Actinobacteria; c__Coriobacteriia; o__Coriobacteriales; f__Eggerthellaceae
OTU_285	0	0	0	0	0	0	0	0	1	2	6	0	0	1	0	3	0	0	0	0	1	0	1	4	3	0	0	0	0	10	k__Bacteria; p__Firmicutes; c__Clostridia; o__Clostridiales; f__Ruminococcaceae
OTU_1219	0	0	0	0	0	0	0	0	2	0	0	0	0	0	0	0	0	0	0	0	0	0	0	0	0	0	0	0	0	0	k__Bacteria; p__Firmicutes; c__Clostridia; o__Clostridiales; f__Ruminococcaceae
OTU_643	0	0	0	0	0	0	0	0	2	3	0	0	0	0	0	0	0	0	0	0	0	0	0	0	0	0	0	0	0	0	k__Bacteria; p__Firmicutes; c__Clostridia; o__Clostridiales; f__Lachnospiraceae
OTU_682	0	0	0	0	0	0	0	0	2	0	0	0	0	0	0	0	0	0	0	0	0	0	0	0	0	0	0	0	0	0	k__Bacteria; p__Bacteroidetes; c__Bacteroidia; o__Bacteroidales; f__Tannerellaceae; g__Parabacteroides
OTU_896	0	0	0	0	0	0	0	0	2	0	0	0	0	0	0	0	0	0	0	0	0	0	0	0	0	0	0	0	0	0	k__Bacteria; p__Firmicutes; c__Clostridia; o__Clostridiales; f__Ruminococcaceae
OTU_603	0	0	0	0	0	0	0	0	1	0	0	0	0	0	0	0	0	0	2	0	0	0	0	0	0	0	0	1	0	0	k__Bacteria; p__Proteobacteria; c__Alphaproteobacteria; o__Rhodospirillales; f__uncultured
OTU_486	0	0	0	0	0	0	0	0	1	0	0	0	0	0	0	0	0	0	0	0	0	0	0	1	0	0	0	3	0	0	k__Bacteria; p__Firmicutes; c__Clostridia; o__Clostridiales; f__Lachnospiraceae; g__Blautia; s__Lachnospiraceae bacterium 28-4
OTU_245	0	0	0	0	0	0	0	0	0	39	1	0	0	0	0	0	0	0	0	0	0	0	0	0	1	0	1	0	0	0	k__Bacteria; p__Firmicutes; c__Clostridia; o__Clostridiales; f__Ruminococcaceae; g__Ruminococcaceae UCG-014
OTU_524	0	0	0	0	0	0	0	0	0	2	0	0	0	0	0	0	0	0	0	0	0	3	0	0	0	0	0	0	0	0	k__Bacteria; p__Bacteroidetes; c__Bacteroidia; o__Bacteroidales; f__Muribaculaceae; g__uncultured bacterium; s__uncultured bacterium
OTU_862	0	0	0	0	0	0	0	0	0	3	0	0	0	0	0	0	0	0	0	0	0	0	0	0	0	0	0	0	0	0	k__Bacteria; p__Firmicutes; c__Negativicutes; o__Selenomonadales; f__Veillonellaceae
OTU_252	0	0	0	0	0	0	0	0	0	28	0	0	0	0	0	0	0	0	0	1	0	0	0	0	0	0	0	0	0	0	k__Bacteria; p__Bacteroidetes; c__Bacteroidia; o__Bacteroidales; f__Prevotellaceae; g__Prevotellaceae UCG-001; s__uncultured bacterium
OTU_600	0	0	0	0	0	0	0	0	0	6	0	0	0	0	0	0	0	0	0	0	0	0	0	0	0	2	3	2	0	0	k__Bacteria; p__Firmicutes; c__Clostridia; o__Clostridiales; f__Ruminococcaceae; g__Caproiciproducens; s__uncultured bacterium
OTU_401	0	0	0	0	0	0	0	0	0	1	0	0	0	0	0	0	0	0	0	0	0	0	0	0	0	0	0	7	2	0	k__Bacteria; p__Firmicutes; c__Clostridia; o__Clostridiales; f__Ruminococcaceae; g__Ruminococcaceae UCG-014
OTU_863	0	0	0	0	0	0	0	0	0	2	0	0	0	0	0	0	0	0	0	0	0	0	0	0	0	0	0	0	0	0	k__Bacteria; p__Bacteroidetes; c__Bacteroidia; o__Bacteroidales; f__Muribaculaceae
OTU_677	0	0	0	0	0	0	0	0	0	2	0	0	0	0	0	0	0	0	0	0	0	0	0	0	0	0	0	0	0	0	k__Bacteria
OTU_467	0	0	0	0	0	0	0	0	0	1	0	0	0	0	0	1	0	0	0	0	0	0	0	3	0	0	0	0	0	0	k__Bacteria; p__Bacteroidetes; c__Bacteroidia; o__Bacteroidales; f__Muribaculaceae; g__uncultured bacterium; s__uncultured bacterium
OTU_1204	0	0	0	0	0	0	0	0	0	3	0	0	0	0	0	0	0	0	0	0	0	0	0	0	0	0	0	0	0	0	k__Bacteria; p__Chloroflexi; c__Chloroflexia; o__Thermomicrobiales; f__AKYG1722; g__uncultured Chloroflexi bacterium; s__uncultured Chloroflexi bacterium
OTU_1169	0	0	0	0	0	0	0	0	0	2	0	0	0	0	0	0	0	0	0	0	0	0	0	0	0	0	0	0	0	0	k__Bacteria; p__Firmicutes
OTU_1051	0	0	0	0	0	0	0	0	0	2	0	2	0	0	0	1	0	1	0	1	2	0	1	0	0	0	2	0	1	2	k__Bacteria; p__Bacteroidetes; c__Bacteroidia; o__Bacteroidales
OTU_1190	0	0	0	0	0	0	0	0	0	2	0	0	0	0	0	0	0	0	0	0	0	0	0	0	0	0	0	0	0	0	k__Bacteria; p__Bacteroidetes; c__Bacteroidia; o__Bacteroidales; f__Bacteroidaceae; g__Bacteroides
OTU_1237	0	0	0	0	0	0	0	0	0	7	5	2	10	4	0	0	0	0	0	0	1	1	1	0	7	1	0	0	1	0	k__Bacteria; p__Firmicutes; c__Clostridia; o__Clostridiales; f__Ruminococcaceae
OTU_633	0	0	0	0	0	0	0	0	0	2	0	0	0	0	0	0	0	0	0	0	1	0	0	0	0	0	0	0	0	0	k__Bacteria; p__Bacteroidetes; c__Bacteroidia; o__Bacteroidales
OTU_1037	0	0	0	0	0	0	0	0	0	2	0	0	0	0	0	0	0	0	0	0	0	0	0	0	0	0	0	0	0	0	k__Bacteria
OTU_688	0	0	0	0	0	0	0	0	0	2	0	0	0	0	0	0	0	0	0	0	0	0	0	0	0	0	0	0	0	0	k__Bacteria; p__Chloroflexi; c__Anaerolineae; o__Anaerolineales; f__Anaerolineaceae; g__Anaerolinea; s__uncultured soil bacterium
OTU_902	0	0	0	0	0	0	0	0	0	2	0	0	0	0	0	0	0	0	0	0	0	0	0	0	0	0	0	0	0	0	k__Bacteria; p__Firmicutes; c__Clostridia; o__Clostridiales; f__Lachnospiraceae
OTU_901	0	0	0	0	0	0	0	0	0	2	0	0	0	0	0	0	0	0	0	0	0	0	0	0	0	0	0	0	0	0	k__Bacteria; p__Firmicutes; c__Erysipelotrichia; o__Erysipelotrichales; f__Erysipelotrichaceae; g__Dubosiella; s__uncultured Erysipelotrichales bacterium
OTU_1220	0	0	0	0	0	0	0	0	0	4	0	0	0	0	0	0	0	0	0	0	0	0	0	0	0	0	0	0	0	0	k__Bacteria; p__Proteobacteria; c__Gammaproteobacteria; o__Betaproteobacteriales; f__Neisseriaceae; g__Neisseria
OTU_820	0	0	0	0	0	0	0	0	0	3	0	0	0	0	0	0	0	0	0	0	0	0	0	0	0	0	0	0	0	0	k__Bacteria; p__Firmicutes; c__Clostridia; o__Clostridiales
OTU_631	0	0	0	0	0	0	0	0	0	2	0	0	0	0	0	0	0	0	0	0	0	0	0	0	0	0	0	0	0	1	k__Bacteria; p__Firmicutes; c__Clostridia; o__Clostridiales
OTU_456	0	0	0	0	0	0	0	0	0	5	0	0	0	1	0	0	0	0	2	0	1	0	0	0	0	0	0	0	0	0	k__Bacteria; p__Proteobacteria; c__Gammaproteobacteria; o__Pasteurellales; f__Pasteurellaceae; g__Haemophilus; s__uncultured bacterium
OTU_585	0	0	0	0	0	0	0	0	0	3	0	0	0	0	0	0	0	0	0	0	0	0	0	0	0	0	0	0	0	0	k__Bacteria; p__Firmicutes; c__Clostridia; o__Clostridiales; f__Lachnospiraceae; g__Lachnospiraceae NK4A136 group
OTU_522	0	0	0	0	0	0	0	0	0	2	0	0	0	0	0	0	0	0	0	0	0	0	0	0	3	0	0	0	0	0	k__Bacteria; p__Bacteroidetes; c__Bacteroidia; o__Bacteroidales; f__Muribaculaceae; g__uncultured bacterium; s__uncultured bacterium
OTU_903	0	0	0	0	0	0	0	0	0	4	0	0	0	0	0	0	0	0	0	0	0	0	0	0	0	0	0	0	0	0	k__Bacteria; p__Cyanobacteria; c__Oxyphotobacteria; o__Nostocales; f__Oscillatoriaceae; g__Oscillatoria PCC-6304; s__uncultured cyanobacterium
OTU_591	0	0	0	0	0	0	0	0	0	1	2	0	0	0	1	0	2	0	0	2	0	6	1	0	0	0	0	1	0	5	k__Bacteria; p__Firmicutes; c__Clostridia; o__Clostridiales; f__Lachnospiraceae; g__[Ruminococcus] torques group; s__uncultured organism
OTU_891	0	0	0	0	0	0	0	0	0	2	0	0	0	0	0	0	0	0	0	0	0	0	0	0	0	0	0	0	0	0	k__Bacteria; p__Firmicutes; c__Clostridia; o__Clostridiales; f__Peptococcaceae; g__Peptococcus; s__unidentified
OTU_431	0	0	0	0	0	0	0	0	0	4	0	0	0	0	0	0	0	0	0	0	0	0	0	0	0	0	0	0	0	0	k__Bacteria; p__Firmicutes
OTU_687	0	0	0	0	0	0	0	0	0	3	0	0	0	0	0	0	0	0	0	0	0	0	0	0	0	0	0	0	0	0	k__Bacteria
OTU_1156	0	0	0	0	0	0	0	0	0	2	0	0	0	0	0	0	0	0	0	0	0	0	0	0	0	0	0	0	0	0	k__Bacteria; p__Bacteroidetes; c__Bacteroidia; o__Bacteroidales; f__Bacteroidaceae; g__Bacteroides
OTU_808	0	0	0	0	0	0	0	0	0	1	0	1	2	0	0	2	0	0	0	5	0	0	0	0	0	0	1	0	2	0	k__Bacteria; p__Bacteroidetes; c__Bacteroidia; o__Bacteroidales
OTU_1005	0	0	0	0	0	0	0	0	0	2	0	0	0	0	0	0	0	0	0	0	0	0	0	0	0	0	0	0	0	0	k__Bacteria; p__Chloroflexi; c__Anaerolineae; o__Caldilineales; f__Caldilineaceae; g__uncultured; s__uncultured soil bacterium
OTU_1047	0	0	0	0	0	0	0	0	0	2	0	0	0	0	0	0	0	0	0	0	0	0	0	0	0	0	0	0	0	0	k__Bacteria; p__Firmicutes; c__Clostridia; o__Clostridiales; f__Ruminococcaceae
OTU_605	0	0	0	0	0	0	0	0	0	2	0	0	0	0	0	0	0	0	0	0	0	0	0	0	0	0	0	0	0	0	k__Bacteria; p__Firmicutes
OTU_618	0	0	0	0	0	0	0	0	0	2	0	0	0	0	0	0	0	0	0	0	0	0	0	0	0	0	0	0	0	0	k__Bacteria; p__Acidobacteria; c__Subgroup 6; o__uncultured Acidobacteriales bacterium; f__uncultured Acidobacteriales bacterium; g__uncultured Acidobacteriales bacterium; s__uncultured Acidobacteriales bacterium
OTU_686	0	0	0	0	0	0	0	0	0	1	0	0	0	0	0	0	0	0	0	0	0	0	0	0	0	0	0	1	0	0	k__Bacteria; p__Proteobacteria; c__Gammaproteobacteria; o__Betaproteobacteriales; f__Burkholderiaceae; g__Delftia
OTU_104	0	0	0	0	0	0	0	0	0	0	105	4	47	0	0	24	21	0	24	23	16	5	17	11	32	72	6	15	13	27	k__Bacteria; p__Firmicutes; c__Clostridia; o__Clostridiales; f__Ruminococcaceae; g__GCA-900066225
OTU_1193	0	0	0	0	0	0	0	0	0	0	2	0	0	0	0	0	0	0	0	0	0	0	0	0	0	1	0	1	1	0	k__Bacteria; p__Bacteroidetes; c__Bacteroidia; o__Bacteroidales
OTU_1019	0	0	0	0	0	0	0	0	0	0	1	2	0	0	0	0	0	0	0	0	0	0	0	0	0	0	0	0	0	0	k__Bacteria; p__Bacteroidetes; c__Bacteroidia; o__Bacteroidales
OTU_1008	0	0	0	0	0	0	0	0	0	0	2	0	0	0	0	0	0	0	0	0	0	0	0	0	0	0	0	0	0	0	k__Bacteria; p__Bacteroidetes; c__Bacteroidia; o__Bacteroidales; f__Muribaculaceae; g__uncultured bacterium; s__uncultured bacterium
OTU_1042	0	0	0	0	0	0	0	0	0	0	3	0	0	0	0	0	0	0	0	0	0	0	0	0	0	0	0	0	0	0	k__Bacteria; p__Firmicutes; c__Clostridia; o__Clostridiales; f__Ruminococcaceae
OTU_596	0	0	0	0	0	0	0	0	0	0	3	0	0	0	0	0	0	0	0	0	0	0	0	0	0	0	0	0	0	0	k__Bacteria; p__Bacteroidetes; c__Bacteroidia; o__Bacteroidales; f__Muribaculaceae
OTU_899	0	0	0	0	0	0	0	0	0	0	3	4	0	0	0	0	0	0	0	0	0	0	0	0	0	0	0	1	0	0	k__Bacteria; p__Verrucomicrobia; c__Verrucomicrobiae; o__Verrucomicrobiales; f__Akkermansiaceae; g__Akkermansia; s__unidentified
OTU_1176	0	0	0	0	0	0	0	0	0	0	2	0	0	0	0	0	0	0	0	0	0	0	0	0	0	0	0	0	0	0	k__Bacteria; p__Firmicutes; c__Clostridia; o__Clostridiales; f__Lachnospiraceae
OTU_182	0	0	0	0	0	0	0	0	0	0	1	5	56	0	0	0	0	0	0	0	5	33	6	0	0	0	0	0	0	0	k__Bacteria; p__Firmicutes; c__Clostridia; o__Clostridiales; f__Lachnospiraceae
OTU_950	0	0	0	0	0	0	0	0	0	0	3	1	0	2	0	2	0	0	0	0	0	2	0	5	0	0	0	0	5	0	k__Bacteria; p__Bacteroidetes; c__Bacteroidia; o__Bacteroidales; f__Muribaculaceae; g__uncultured bacterium; s__uncultured bacterium
OTU_1328	0	0	0	0	0	0	0	0	0	0	3	0	0	0	0	0	0	0	0	0	0	0	0	0	0	0	0	0	0	0	k__Bacteria; p__Firmicutes; c__Clostridia; o__Clostridiales; f__Lachnospiraceae
OTU_1285	0	0	0	0	0	0	0	0	0	0	2	0	0	0	0	0	0	0	0	0	0	0	0	0	0	0	0	0	0	0	k__Bacteria
OTU_1183	0	0	0	0	0	0	0	0	0	0	2	0	0	0	0	0	0	0	0	0	0	0	0	0	0	0	0	0	0	0	k__Bacteria; p__Firmicutes
OTU_550	0	0	0	0	0	0	0	0	0	0	3	0	0	0	0	0	0	0	0	0	0	0	0	0	0	0	0	0	0	0	k__Bacteria; p__Bacteroidetes; c__Bacteroidia; o__Bacteroidales; f__Rikenellaceae; g__Alistipes
OTU_1263	0	0	0	0	0	0	0	0	0	0	1	0	2	0	0	0	0	0	0	0	0	0	0	0	0	0	0	0	0	0	k__Bacteria; p__Firmicutes; c__Clostridia; o__Clostridiales; f__Lachnospiraceae; g__uncultured; s__uncultured bacterium
OTU_665	0	0	0	0	0	0	0	0	0	0	2	0	0	0	0	0	0	0	0	0	0	0	0	0	0	0	0	0	0	0	k__Bacteria; p__Bacteroidetes; c__Bacteroidia; o__Bacteroidales; f__Tannerellaceae; g__Parabacteroides; s__Parabacteroides goldsteinii CL02T12C30
OTU_1007	0	0	0	0	0	0	0	0	0	0	3	0	0	0	0	0	0	0	0	0	0	0	0	0	0	0	0	0	0	0	k__Bacteria; p__Firmicutes; c__Erysipelotrichia; o__Erysipelotrichales; f__Erysipelotrichaceae; g__Erysipelatoclostridium; s__uncultured bacterium
OTU_652	0	0	0	0	0	0	0	0	0	0	2	0	0	0	0	0	0	0	0	0	0	0	0	0	0	1	0	0	0	0	k__Bacteria; p__Bacteroidetes; c__Bacteroidia; o__Bacteroidales; f__Muribaculaceae; g__uncultured bacterium; s__uncultured bacterium
OTU_994	0	0	0	0	0	0	0	0	0	0	2	0	0	0	0	0	0	0	0	0	0	0	0	0	0	0	0	0	0	0	k__Bacteria; p__Firmicutes; c__Negativicutes; o__Selenomonadales; f__Veillonellaceae; g__Megasphaera; s__uncultured bacterium
OTU_885	0	0	0	0	0	0	0	0	0	0	2	0	0	0	0	0	0	0	0	0	0	0	0	0	0	0	0	0	0	0	k__Bacteria; p__Firmicutes; c__Clostridia; o__Clostridiales; f__Lachnospiraceae
OTU_1043	0	0	0	0	0	0	0	0	0	0	2	0	0	0	0	0	0	0	0	0	0	0	0	0	0	0	0	0	0	0	k__Bacteria; p__Firmicutes; c__Erysipelotrichia; o__Erysipelotrichales; f__Erysipelotrichaceae; g__Ileibacterium; s__Erysipelotrichaceae bacterium NYU-BL-F16
OTU_1249	0	0	0	0	0	0	0	0	0	0	1	0	0	0	0	0	0	0	0	0	3	0	0	0	0	0	0	0	0	0	k__Bacteria; p__Bacteroidetes; c__Bacteroidia; o__Bacteroidales
OTU_714	0	0	0	0	0	0	0	0	0	0	1	1	1	0	0	0	0	0	0	0	0	0	0	0	0	0	0	0	0	0	k__Bacteria; p__Proteobacteria; c__Gammaproteobacteria; o__Cardiobacteriales; f__Cardiobacteriaceae; g__uncultured; s__uncultured bacterium
OTU_933	0	0	0	0	0	0	0	0	0	0	3	0	0	0	0	0	0	0	0	0	0	0	0	0	0	0	0	0	0	0	k__Bacteria; p__Firmicutes; c__Clostridia; o__Clostridiales; f__Lachnospiraceae
OTU_1293	0	0	0	0	0	0	0	0	0	0	4	0	0	0	0	0	0	0	0	0	0	0	0	0	0	0	0	5	0	0	k__Bacteria; p__Firmicutes; c__Bacilli; o__Lactobacillales; f__Lactobacillaceae; g__Lactobacillus; s__Lactobacillus delbrueckii subsp. bulgaricus
OTU_1338	0	0	0	0	0	0	0	0	0	0	2	0	0	0	0	0	0	0	0	0	0	0	0	0	0	0	0	0	0	0	k__Bacteria
OTU_884	0	0	0	0	0	0	0	0	0	0	2	2	0	0	0	1	0	0	0	3	0	0	0	0	0	0	0	1	0	2	k__Bacteria; p__Bacteroidetes; c__Bacteroidia; o__Bacteroidales; f__Muribaculaceae; g__uncultured bacterium; s__uncultured bacterium
OTU_565	0	0	0	0	0	0	0	0	0	0	3	0	0	0	0	0	0	0	0	0	0	0	0	0	0	0	0	0	0	0	k__Bacteria; p__Bacteroidetes; c__Bacteroidia; o__Bacteroidales
OTU_1144	0	0	0	0	0	0	0	0	0	0	1	1	0	0	0	0	0	0	0	0	0	0	0	2	0	1	0	1	0	0	k__Bacteria
OTU_1026	0	0	0	0	0	0	0	0	0	0	1	0	1	0	0	0	0	0	0	0	0	0	0	0	0	0	0	0	0	0	k__Bacteria; p__Firmicutes; c__Clostridia; o__Clostridiales; f__Family XII; g__Fusibacter
OTU_664	0	0	0	0	0	0	0	0	0	0	2	0	0	0	0	0	0	0	0	0	0	0	0	0	0	0	0	0	0	0	k__Bacteria; p__Bacteroidetes; c__Bacteroidia; o__Bacteroidales
OTU_359	0	0	0	0	0	0	0	0	0	0	1	6	1	0	0	2	0	0	0	0	0	0	0	0	0	0	0	0	0	0	k__Bacteria; p__Bacteroidetes; c__Bacteroidia; o__Bacteroidales; f__Bacteroidaceae; g__Bacteroides
OTU_1028	0	0	0	0	0	0	0	0	0	0	0	2	0	0	0	0	0	0	0	0	0	0	0	0	0	0	0	0	0	0	k__Bacteria; p__Firmicutes; c__Erysipelotrichia; o__Erysipelotrichales; f__Erysipelotrichaceae; g__Dubosiella; s__uncultured Erysipelotrichales bacterium
OTU_886	0	0	0	0	0	0	0	0	0	0	0	2	0	0	0	0	0	0	0	0	0	0	0	0	0	0	0	0	0	0	k__Bacteria; p__Actinobacteria; c__Coriobacteriia; o__Coriobacteriales; f__Eggerthellaceae; g__Enterorhabdus
OTU_659	0	0	0	0	0	0	0	0	0	0	0	3	0	0	0	0	0	0	0	0	0	0	0	0	0	0	0	0	0	0	k__Bacteria; p__Firmicutes; c__Clostridia; o__Clostridiales; f__Family XII; g__Fusibacter; s__uncultured bacterium
OTU_932	0	0	0	0	0	0	0	0	0	0	0	2	0	0	0	0	0	0	0	0	0	0	0	0	0	0	0	0	0	0	k__Bacteria; p__Bacteroidetes; c__Bacteroidia; o__Bacteroidales
OTU_1256	0	0	0	0	0	0	0	0	0	0	0	3	0	0	0	0	0	0	0	0	0	0	0	0	0	0	0	0	1	0	k__Bacteria; p__Bacteroidetes; c__Bacteroidia; o__Bacteroidales; f__Tannerellaceae; g__Parabacteroides
OTU_400	0	0	0	0	0	0	0	0	0	0	0	1	0	2	0	0	0	0	0	4	0	0	0	0	0	0	0	0	0	0	k__Bacteria; p__Proteobacteria; c__Alphaproteobacteria; o__Caulobacterales; f__Caulobacteraceae; g__Asticcacaulis; s__Asticcacaulis sp. f28(2011)
OTU_881	0	0	0	0	0	0	0	0	0	0	0	2	0	1	0	0	0	0	0	0	0	0	0	0	0	0	0	0	0	0	k__Bacteria; p__Bacteroidetes; c__Bacteroidia; o__Bacteroidales; f__Tannerellaceae; g__Parabacteroides
OTU_826	0	0	0	0	0	0	0	0	0	0	0	1	0	0	0	0	0	0	0	1	0	0	0	4	2	0	0	0	0	0	k__Bacteria; p__Bacteroidetes; c__Bacteroidia; o__Bacteroidales
OTU_517	0	0	0	0	0	0	0	0	0	0	0	3	0	0	0	0	0	0	0	0	0	0	0	0	0	0	0	0	0	0	k__Bacteria; p__Bacteroidetes; c__Bacteroidia; o__Bacteroidales
OTU_388	0	0	0	0	0	0	0	0	0	0	0	2	2	0	0	4	0	0	0	0	1	0	1	1	2	5	2	0	0	0	k__Bacteria; p__Firmicutes; c__Clostridia; o__Clostridiales; f__Ruminococcaceae; g__Harryflintia; s__uncultured bacterium
OTU_1023	0	0	0	0	0	0	0	0	0	0	0	2	0	0	0	0	0	0	0	0	0	0	0	0	0	0	0	0	0	0	k__Bacteria; p__Firmicutes; c__Clostridia; o__Clostridiales; f__Lachnospiraceae
OTU_471	0	0	0	0	0	0	0	0	0	0	0	1	0	0	0	0	3	1	0	0	0	0	1	0	0	0	0	0	1	1	k__Bacteria; p__Firmicutes; c__Erysipelotrichia; o__Erysipelotrichales; f__Erysipelotrichaceae; g__Dubosiella; s__uncultured Erysipelotrichales bacterium
OTU_1025	0	0	0	0	0	0	0	0	0	0	0	0	2	0	0	0	0	0	0	0	0	0	0	0	0	0	0	0	0	0	k__Bacteria; p__Actinobacteria; c__Actinobacteria
OTU_730	0	0	0	0	0	0	0	0	0	0	0	0	2	1	0	0	0	0	0	0	0	0	0	0	0	0	0	0	0	0	k__Bacteria; p__Firmicutes; c__Clostridia; o__Clostridiales
OTU_563	0	0	0	0	0	0	0	0	0	0	0	0	2	0	0	0	0	0	0	3	0	0	0	0	0	0	0	0	0	0	k__Bacteria; p__Firmicutes; c__Clostridia; o__Clostridiales; f__Lachnospiraceae
OTU_756	0	0	0	0	0	0	0	0	0	0	0	0	1	0	0	0	0	0	4	0	0	0	0	1	0	1	0	0	4	0	k__Bacteria; p__Bacteroidetes; c__Bacteroidia; o__Bacteroidales; f__Muribaculaceae; g__uncultured bacterium; s__uncultured bacterium
OTU_722	0	0	0	0	0	0	0	0	0	0	0	0	2	0	0	0	0	0	0	0	0	0	0	0	0	0	0	0	0	0	k__Bacteria; p__Chloroflexi; c__Chloroflexia; o__Thermomicrobiales; f__JG30-KF-CM45
OTU_1010	0	0	0	0	0	0	0	0	0	0	0	0	2	0	0	0	0	0	0	0	0	0	0	0	0	0	0	0	0	0	k__Bacteria; p__Proteobacteria; c__Gammaproteobacteria; o__Pseudomonadales; f__Moraxellaceae; g__Psychrobacter
OTU_1160	0	0	0	0	0	0	0	0	0	0	0	0	1	1	0	4	4	3	0	1	1	2	0	1	1	0	0	0	8	0	k__Bacteria; p__Bacteroidetes; c__Bacteroidia; o__Bacteroidales; f__Muribaculaceae; g__uncultured bacterium; s__uncultured bacterium
OTU_746	0	0	0	0	0	0	0	0	0	0	0	0	1	0	0	0	2	0	0	0	0	0	2	0	0	0	0	0	0	0	k__Bacteria; p__Bacteroidetes; c__Bacteroidia; o__Bacteroidales; f__Muribaculaceae; g__uncultured bacterium; s__uncultured bacterium
OTU_724	0	0	0	0	0	0	0	0	0	0	0	0	2	0	0	0	0	0	0	0	0	0	0	0	0	0	0	0	0	0	k__Bacteria
OTU_1266	0	0	0	0	0	0	0	0	0	0	0	0	2	0	0	0	0	0	0	0	0	0	0	0	0	0	0	0	0	0	k__Bacteria; p__Firmicutes; c__Clostridia; o__Clostridiales
OTU_248	0	0	0	0	0	0	0	0	0	0	0	0	1	1	0	1	4	1	1	0	2	0	0	1	0	4	3	3	1	2	k__Bacteria; p__Firmicutes; c__Bacilli; o__Lactobacillales; f__Lactobacillaceae; g__Lactobacillus; s__Lactobacillus fermentum
OTU_893	0	0	0	0	0	0	0	0	0	0	0	0	2	0	0	0	0	0	0	0	0	0	0	0	0	0	0	0	0	1	k__Bacteria; p__Firmicutes; c__Clostridia; o__Clostridiales
OTU_1029	0	0	0	0	0	0	0	0	0	0	0	0	3	0	0	0	0	0	0	0	0	0	0	0	0	0	0	0	0	0	k__Bacteria; p__Firmicutes; c__Clostridia; o__Clostridiales; f__Lachnospiraceae; g__Lachnospiraceae NK4A136 group
OTU_106	0	0	0	0	0	0	0	0	0	0	0	0	1	0	0	22	9	24	32	9	0	0	0	131	17	136	25	234	160	99	k__Bacteria; p__Bacteroidetes; c__Bacteroidia; o__Bacteroidales; f__Muribaculaceae; g__uncultured bacterium; s__uncultured bacterium
OTU_1081	0	0	0	0	0	0	0	0	0	0	0	0	3	0	0	1	4	0	0	0	0	0	0	0	0	0	0	0	0	0	k__Bacteria; p__Bacteroidetes; c__Bacteroidia; o__Bacteroidales
OTU_1218	0	0	0	0	0	0	0	0	0	0	0	0	2	0	0	0	0	0	0	0	0	0	0	0	0	0	0	0	0	0	k__Bacteria; p__Firmicutes; c__Clostridia; o__Clostridiales; f__Lachnospiraceae; g__Lachnospiraceae NK4A136 group; s__Clostridiales bacterium CIEAF 020
OTU_936	0	0	0	0	0	0	0	0	0	0	0	0	2	0	0	0	0	0	0	0	0	0	0	0	0	0	0	0	0	0	k__Bacteria
OTU_1326	0	0	0	0	0	0	0	0	0	0	0	0	2	0	0	0	0	0	0	0	0	0	0	0	0	0	0	0	0	0	k__Bacteria
OTU_387	0	0	0	0	0	0	0	0	0	0	0	0	0	13	0	0	0	0	0	0	0	0	0	0	0	0	0	0	0	0	k__Bacteria; p__Firmicutes; c__Clostridia; o__Clostridiales; f__Lachnospiraceae; g__uncultured
OTU_1334	0	0	0	0	0	0	0	0	0	0	0	0	0	54	0	0	0	0	0	0	0	0	0	7	0	0	0	0	0	0	k__Bacteria; p__Firmicutes; c__Clostridia; o__Clostridiales; f__Lachnospiraceae; g__uncultured; s__Clostridium sp. Culture-41
OTU_699	0	0	0	0	0	0	0	0	0	0	0	0	0	2	0	0	0	0	0	0	0	0	0	0	0	0	0	0	0	0	k__Bacteria; p__Bacteroidetes; c__Bacteroidia; o__Bacteroidales; f__Muribaculaceae
OTU_684	0	0	0	0	0	0	0	0	0	0	0	0	0	3	0	0	0	0	0	0	0	0	0	0	0	0	0	0	0	0	k__Bacteria; p__Bacteroidetes; c__Bacteroidia; o__Bacteroidales
OTU_1030	0	0	0	0	0	0	0	0	0	0	0	0	0	2	0	0	0	0	0	0	0	0	0	0	0	0	0	0	0	0	k__Bacteria; p__Bacteroidetes; c__Bacteroidia; o__Bacteroidales; f__Bacteroidaceae; g__Bacteroides; s__Bacteroides acidifaciens JCM 10556
OTU_1199	0	0	0	0	0	0	0	0	0	0	0	0	0	2	0	0	0	0	0	0	0	0	0	0	0	0	0	0	0	0	k__Bacteria; p__Bacteroidetes; c__Bacteroidia; o__Bacteroidales; f__Muribaculaceae
OTU_707	0	0	0	0	0	0	0	0	0	0	0	0	0	2	0	0	0	0	0	0	0	0	0	0	0	0	0	0	0	0	k__Bacteria; p__Bacteroidetes; c__Bacteroidia; o__Bacteroidales
OTU_708	0	0	0	0	0	0	0	0	0	0	0	0	0	2	0	0	0	0	0	0	0	0	0	0	0	0	0	0	0	0	k__Bacteria; p__Rokubacteria; c__NC10; o__Rokubacteriales; f__metagenome; g__metagenome; s__metagenome
OTU_880	0	0	0	0	0	0	0	0	0	0	0	0	0	2	0	0	0	0	0	0	0	0	0	0	0	0	0	0	0	0	k__Bacteria; p__Firmicutes; c__Clostridia; o__Clostridiales; f__Lachnospiraceae
OTU_894	0	0	0	0	0	0	0	0	0	0	0	0	0	2	0	0	0	0	0	0	0	0	0	0	0	0	0	0	0	0	k__Bacteria; p__Firmicutes
OTU_887	0	0	0	0	0	0	0	0	0	0	0	0	0	3	0	0	0	0	0	0	0	0	0	0	0	0	0	0	0	0	k__Bacteria; p__Bacteroidetes; c__Bacteroidia; o__Bacteroidales
OTU_784	0	0	0	0	0	0	0	0	0	0	0	0	0	1	2	0	0	0	0	0	0	0	0	0	0	0	6	2	0	0	k__Bacteria; p__Bacteroidetes; c__Bacteroidia; o__Bacteroidales; f__Bacteroidaceae; g__Bacteroides
OTU_1223	0	0	0	0	0	0	0	0	0	0	0	0	0	2	0	1	0	0	0	0	0	0	0	0	0	0	0	0	0	0	k__Bacteria; p__Bacteroidetes; c__Bacteroidia; o__Bacteroidales
OTU_1130	0	0	0	0	0	0	0	0	0	0	0	0	0	3	0	0	0	0	0	0	0	0	0	2	0	0	0	0	0	0	k__Bacteria; p__Firmicutes; c__Erysipelotrichia; o__Erysipelotrichales; f__Erysipelotrichaceae; g__uncultured bacterium; s__uncultured bacterium
OTU_888	0	0	0	0	0	0	0	0	0	0	0	0	0	2	0	0	0	0	0	0	0	0	0	0	0	0	0	0	0	0	k__Bacteria; p__Firmicutes; c__Erysipelotrichia; o__Erysipelotrichales; f__Erysipelotrichaceae; g__Faecalibaculum; s__Faecalibaculum rodentium
OTU_1305	0	0	0	0	0	0	0	0	0	0	0	0	0	0	5	0	0	0	0	0	0	0	0	0	0	0	0	0	0	0	k__Bacteria; p__Bacteroidetes; c__Bacteroidia; o__Bacteroidales; f__Tannerellaceae; g__Parabacteroides
OTU_735	0	0	0	0	0	0	0	0	0	0	0	0	0	0	2	0	0	0	0	0	0	0	0	0	0	0	0	0	0	0	k__Bacteria; p__Proteobacteria; c__Gammaproteobacteria; o__Enterobacteriales; f__Enterobacteriaceae
OTU_927	0	0	0	0	0	0	0	0	0	0	0	0	0	0	0	2	0	0	0	0	0	0	0	0	0	0	0	0	0	0	k__Bacteria; p__Bacteroidetes; c__Bacteroidia; o__Bacteroidales; f__Muribaculaceae; g__uncultured bacterium; s__uncultured bacterium
OTU_375	0	0	0	0	0	0	0	0	0	0	0	0	0	0	0	9	0	0	0	0	0	5	1	0	2	4	6	0	0	0	k__Bacteria; p__Firmicutes; c__Clostridia; o__Clostridiales; f__Ruminococcaceae; g__Ruminococcaceae UCG-002; s__uncultured bacterium
OTU_511	0	0	0	0	0	0	0	0	0	0	0	0	0	0	0	3	0	0	1	0	0	0	4	6	1	0	0	8	0	0	k__Bacteria; p__Firmicutes; c__Clostridia; o__Clostridiales; f__Ruminococcaceae; g__[Eubacterium] coprostanoligenes group
OTU_930	0	0	0	0	0	0	0	0	0	0	0	0	0	0	0	2	0	0	0	0	0	0	1	0	0	2	0	0	0	0	k__Bacteria; p__Proteobacteria; c__Gammaproteobacteria; o__Enterobacteriales; f__Enterobacteriaceae; g__Proteus
OTU_354	0	0	0	0	0	0	0	0	0	0	0	0	0	0	0	31	0	0	3	0	0	0	0	0	0	0	0	0	0	0	k__Bacteria; p__Bacteroidetes; c__Bacteroidia; o__Bacteroidales; f__Muribaculaceae; g__uncultured bacterium; s__uncultured bacterium
OTU_286	0	0	0	0	0	0	0	0	0	0	0	0	0	0	0	4	0	0	0	0	0	0	0	0	0	0	0	0	0	9	k__Bacteria; p__Bacteroidetes; c__Bacteroidia; o__Bacteroidales; f__Bacteroidaceae; g__Bacteroides; s__uncultured bacterium
OTU_1072	0	0	0	0	0	0	0	0	0	0	0	0	0	0	0	2	0	0	0	0	0	0	0	0	0	0	0	0	0	0	k__Bacteria; p__Bacteroidetes; c__Bacteroidia; o__Bacteroidales; f__Muribaculaceae; g__uncultured bacterium; s__uncultured bacterium
OTU_355	0	0	0	0	0	0	0	0	0	0	0	0	0	0	0	4	0	0	7	0	0	0	34	7	12	6	3	14	0	0	k__Bacteria; p__Firmicutes; c__Clostridia; o__Clostridiales; f__Ruminococcaceae; g__Ruminococcaceae UCG-005
OTU_783	0	0	0	0	0	0	0	0	0	0	0	0	0	0	0	3	0	0	0	0	0	0	0	0	0	0	0	0	0	0	k__Bacteria; p__Bacteroidetes; c__Bacteroidia; o__Bacteroidales; f__Muribaculaceae; g__uncultured bacterium; s__uncultured bacterium
OTU_926	0	0	0	0	0	0	0	0	0	0	0	0	0	0	0	2	0	0	0	0	0	0	0	0	0	0	0	0	0	0	k__Bacteria; p__Bacteroidetes; c__Bacteroidia; o__Bacteroidales; f__Muribaculaceae; g__Muribaculum
OTU_420	0	0	0	0	0	0	0	0	0	0	0	0	0	0	0	3	0	4	0	0	0	0	0	0	0	0	0	0	0	0	k__Bacteria; p__Proteobacteria; c__Deltaproteobacteria; o__Desulfuromonadales; f__Geobacteraceae; g__Geobacter
OTU_1165	0	0	0	0	0	0	0	0	0	0	0	0	0	0	0	2	2	0	0	0	0	0	0	0	0	0	0	0	0	0	k__Bacteria; p__Bacteroidetes; c__Bacteroidia; o__Bacteroidales; f__Muribaculaceae; g__uncultured bacterium; s__uncultured bacterium
OTU_1133	0	0	0	0	0	0	0	0	0	0	0	0	0	0	0	2	0	0	0	0	0	0	1	0	0	0	0	0	0	0	k__Bacteria; p__Bacteroidetes; c__Bacteroidia; o__Bacteroidales; f__Muribaculaceae
OTU_764	0	0	0	0	0	0	0	0	0	0	0	0	0	0	0	6	2	5	0	0	0	0	0	0	0	0	0	0	0	4	k__Bacteria; p__Bacteroidetes; c__Bacteroidia; o__Bacteroidales; f__Muribaculaceae
OTU_924	0	0	0	0	0	0	0	0	0	0	0	0	0	0	0	2	3	0	0	1	0	0	0	0	0	0	0	0	0	0	k__Bacteria; p__Bacteroidetes; c__Bacteroidia; o__Bacteroidales; f__Muribaculaceae
OTU_1087	0	0	0	0	0	0	0	0	0	0	0	0	0	0	0	3	0	0	0	0	0	0	0	0	0	0	0	0	0	0	k__Bacteria; p__Bacteroidetes; c__Bacteroidia; o__Bacteroidales; f__Muribaculaceae; g__uncultured bacterium; s__uncultured bacterium
OTU_479	0	0	0	0	0	0	0	0	0	0	0	0	0	0	0	1	0	0	0	0	0	0	1	0	0	0	0	0	0	1	k__Bacteria; p__Firmicutes; c__Clostridia; o__Clostridiales; f__Ruminococcaceae; g__Oscillospira; s__uncultured bacterium
OTU_465	0	0	0	0	0	0	0	0	0	0	0	0	0	0	0	3	0	3	0	0	0	0	0	0	0	0	0	0	0	0	k__Bacteria; p__Proteobacteria; c__Alphaproteobacteria; o__Rhodobacterales; f__Rhodobacteraceae
OTU_1180	0	0	0	0	0	0	0	0	0	0	0	0	0	0	0	3	0	0	0	0	0	0	0	0	0	0	0	0	0	0	k__Bacteria; p__Bacteroidetes; c__Bacteroidia; o__Bacteroidales; f__Muribaculaceae; g__uncultured bacterium; s__uncultured bacterium
OTU_1134	0	0	0	0	0	0	0	0	0	0	0	0	0	0	0	2	0	0	0	0	0	0	0	0	0	0	0	0	0	0	k__Bacteria
OTU_521	0	0	0	0	0	0	0	0	0	0	0	0	0	0	0	1	14	0	0	0	0	0	0	0	0	0	0	0	0	1	k__Bacteria; p__Bacteroidetes; c__Bacteroidia; o__Bacteroidales; f__Muribaculaceae; g__uncultured bacterium; s__uncultured bacterium
OTU_1250	0	0	0	0	0	0	0	0	0	0	0	0	0	0	0	1	0	0	0	2	0	2	1	0	1	0	1	1	0	0	k__Bacteria; p__Firmicutes; c__Clostridia; o__Clostridiales; f__Ruminococcaceae; g__Ruminococcaceae NK4A214 group; s__uncultured rumen bacterium
OTU_317	0	0	0	0	0	0	0	0	0	0	0	0	0	0	0	1	0	0	0	2	0	0	7	3	0	1	1	0	1	1	k__Bacteria; p__Bacteroidetes; c__Bacteroidia; o__Bacteroidales; f__Tannerellaceae; g__Parabacteroides
OTU_737	0	0	0	0	0	0	0	0	0	0	0	0	0	0	0	1	0	0	0	0	0	1	0	0	0	0	0	0	2	0	k__Bacteria; p__Bacteroidetes; c__Bacteroidia; o__Bacteroidales; f__Muribaculaceae; g__uncultured bacterium; s__uncultured bacterium
OTU_1313	0	0	0	0	0	0	0	0	0	0	0	0	0	0	0	1	0	0	0	0	0	0	0	0	0	0	0	2	0	0	k__Bacteria; p__Firmicutes; c__Clostridia; o__Clostridiales; f__Ruminococcaceae; g__Ruminococcaceae UCG-014; s__uncultured bacterium
OTU_788	0	0	0	0	0	0	0	0	0	0	0	0	0	0	0	2	0	0	0	0	0	0	0	0	0	0	0	0	0	0	k__Bacteria; p__Bacteroidetes; c__Bacteroidia; o__Bacteroidales; f__Muribaculaceae; g__uncultured bacterium; s__uncultured bacterium
OTU_621	0	0	0	0	0	0	0	0	0	0	0	0	0	0	0	1	0	0	0	0	1	0	0	0	0	0	1	0	1	0	k__Bacteria; p__Bacteroidetes; c__Bacteroidia; o__Bacteroidales; f__Muribaculaceae; g__uncultured Bacteroidales bacterium; s__uncultured Bacteroidales bacterium
OTU_1244	0	0	0	0	0	0	0	0	0	0	0	0	0	0	0	1	0	0	0	0	0	0	7	0	0	3	0	1	0	0	k__Bacteria; p__Firmicutes; c__Clostridia; o__Clostridiales; f__Ruminococcaceae; g__[Eubacterium] coprostanoligenes group
OTU_1226	0	0	0	0	0	0	0	0	0	0	0	0	0	0	0	0	2	0	0	0	0	0	0	0	0	0	0	0	0	0	k__Bacteria; p__Bacteroidetes; c__Bacteroidia; o__Bacteroidales
OTU_496	0	0	0	0	0	0	0	0	0	0	0	0	0	0	0	0	11	0	0	0	0	0	0	0	0	0	0	0	0	0	k__Bacteria; p__Firmicutes; c__Clostridia; o__Clostridiales; f__Ruminococcaceae; g__Fournierella
OTU_141	0	0	0	0	0	0	0	0	0	0	0	0	0	0	0	0	11	1	49	73	7	0	22	41	0	0	0	0	0	2	k__Bacteria; p__Fusobacteria; c__Fusobacteriia; o__Fusobacteriales; f__Fusobacteriaceae; g__Fusobacterium; s__Fusobacterium sp. RMA 1065
OTU_690	0	0	0	0	0	0	0	0	0	0	0	0	0	0	0	0	3	0	0	0	0	0	0	0	0	0	0	0	0	0	k__Bacteria; p__Bacteroidetes; c__Bacteroidia; o__Bacteroidales; f__Muribaculaceae; g__uncultured bacterium; s__uncultured bacterium
OTU_210	0	0	0	0	0	0	0	0	0	0	0	0	0	0	0	0	29	0	11	14	2	0	33	17	0	0	0	0	0	0	k__Bacteria; p__Fusobacteria; c__Fusobacteriia; o__Fusobacteriales; f__Fusobacteriaceae; g__Fusobacterium
OTU_345	0	0	0	0	0	0	0	0	0	0	0	0	0	0	0	0	9	0	0	0	0	0	0	0	0	0	0	0	0	0	k__Bacteria; p__Firmicutes; c__Clostridia; o__Clostridiales; f__Ruminococcaceae; g__Butyricicoccus; s__Butyricicoccus pullicaecorum 1.2
OTU_308	0	0	0	0	0	0	0	0	0	0	0	0	0	0	0	0	1	0	0	0	0	0	0	0	0	0	10	44	4	0	k__Bacteria; p__Firmicutes; c__Clostridia; o__Clostridiales; f__Lachnospiraceae; g__uncultured; s__uncultured bacterium
OTU_929	0	0	0	0	0	0	0	0	0	0	0	0	0	0	0	0	2	0	0	0	0	0	0	0	0	0	0	0	0	0	k__Bacteria; p__Bacteroidetes; c__Bacteroidia; o__Bacteroidales; f__Muribaculaceae; g__uncultured bacterium; s__uncultured bacterium
OTU_748	0	0	0	0	0	0	0	0	0	0	0	0	0	0	0	0	5	0	0	0	0	0	0	0	0	0	0	0	0	0	k__Bacteria; p__Bacteroidetes; c__Bacteroidia; o__Bacteroidales; f__Muribaculaceae; g__uncultured bacterium; s__uncultured bacterium
OTU_673	0	0	0	0	0	0	0	0	0	0	0	0	0	0	0	0	2	0	0	0	0	0	0	0	0	0	0	0	0	0	k__Bacteria
OTU_340	0	0	0	0	0	0	0	0	0	0	0	0	0	0	0	0	3	0	0	3	0	2	0	1	0	1	1	2	1	0	k__Bacteria; p__Cyanobacteria; c__Oxyphotobacteria; o__Chloroplast
OTU_949	0	0	0	0	0	0	0	0	0	0	0	0	0	0	0	0	2	1	0	0	0	0	0	0	0	0	0	0	2	0	k__Bacteria; p__Firmicutes; c__Erysipelotrichia; o__Erysipelotrichales; f__Erysipelotrichaceae; g__Dubosiella; s__uncultured Erysipelotrichales bacterium
OTU_702	0	0	0	0	0	0	0	0	0	0	0	0	0	0	0	0	2	0	0	0	0	0	0	0	0	0	0	0	0	0	k__Bacteria; p__Bacteroidetes; c__Bacteroidia; o__Bacteroidales
OTU_529	0	0	0	0	0	0	0	0	0	0	0	0	0	0	0	0	1	0	0	0	0	0	0	0	0	0	0	0	0	4	k__Bacteria; p__Bacteroidetes; c__Bacteroidia; o__Bacteroidales
OTU_494	0	0	0	0	0	0	0	0	0	0	0	0	0	0	0	0	3	0	0	0	0	0	0	0	0	0	0	0	0	0	k__Bacteria; p__Bacteroidetes; c__Bacteroidia; o__Bacteroidales; f__Muribaculaceae; g__uncultured bacterium; s__uncultured bacterium
OTU_956	0	0	0	0	0	0	0	0	0	0	0	0	0	0	0	0	1	0	0	0	0	0	0	4	0	2	0	0	3	4	k__Bacteria; p__Bacteroidetes; c__Bacteroidia; o__Bacteroidales; f__Muribaculaceae; g__uncultured bacterium; s__uncultured bacterium
OTU_823	0	0	0	0	0	0	0	0	0	0	0	0	0	0	0	0	2	0	0	0	0	0	0	0	0	0	0	0	0	0	k__Bacteria; p__Bacteroidetes; c__Bacteroidia; o__Bacteroidales; f__Muribaculaceae; g__uncultured bacterium; s__uncultured bacterium
OTU_1307	0	0	0	0	0	0	0	0	0	0	0	0	0	0	0	0	2	0	0	0	0	0	0	0	0	0	0	0	0	0	k__Bacteria; p__Bacteroidetes; c__Bacteroidia; o__Bacteroidales; f__Muribaculaceae
OTU_873	0	0	0	0	0	0	0	0	0	0	0	0	0	0	0	0	2	0	0	0	0	0	0	0	0	2	0	0	0	0	k__Bacteria; p__Firmicutes; c__Bacilli; o__Lactobacillales; f__Lactobacillaceae; g__Lactobacillus; s__Lactobacillus casei
OTU_847	0	0	0	0	0	0	0	0	0	0	0	0	0	0	0	0	1	1	0	3	0	0	0	0	0	0	0	0	0	0	k__Bacteria; p__Bacteroidetes; c__Bacteroidia; o__Bacteroidales
OTU_1321	0	0	0	0	0	0	0	0	0	0	0	0	0	0	0	0	2	0	0	0	0	0	0	0	0	0	0	0	0	0	k__Bacteria; p__Bacteroidetes; c__Bacteroidia; o__Bacteroidales; f__Muribaculaceae; g__uncultured bacterium; s__uncultured bacterium
OTU_801	0	0	0	0	0	0	0	0	0	0	0	0	0	0	0	0	0	3	0	0	0	0	0	0	0	0	0	0	0	0	k__Bacteria; p__Firmicutes; c__Erysipelotrichia; o__Erysipelotrichales; f__Erysipelotrichaceae; g__Faecalibaculum; s__Faecalibaculum rodentium
OTU_1179	0	0	0	0	0	0	0	0	0	0	0	0	0	0	0	0	0	2	0	0	0	0	0	0	0	0	0	0	0	0	k__Bacteria; p__Bacteroidetes; c__Bacteroidia; o__Bacteroidales
OTU_1212	0	0	0	0	0	0	0	0	0	0	0	0	0	0	0	0	0	2	2	0	0	0	0	0	0	0	0	0	0	0	k__Bacteria; p__Proteobacteria; c__Deltaproteobacteria; o__Desulfovibrionales; f__Desulfovibrionaceae; g__uncultured; s__uncultured bacterium
OTU_761	0	0	0	0	0	0	0	0	0	0	0	0	0	0	0	0	0	2	0	0	0	0	0	0	0	0	0	0	0	0	k__Bacteria; p__Firmicutes; c__Erysipelotrichia; o__Erysipelotrichales; f__Erysipelotrichaceae; g__Faecalibaculum; s__Faecalibaculum rodentium
OTU_647	0	0	0	0	0	0	0	0	0	0	0	0	0	0	0	0	0	2	3	0	0	0	0	0	0	0	1	0	1	0	k__Bacteria; p__Firmicutes; c__Erysipelotrichia; o__Erysipelotrichales; f__Erysipelotrichaceae; g__Dubosiella; s__uncultured Erysipelotrichales bacterium
OTU_1280	0	0	0	0	0	0	0	0	0	0	0	0	0	0	0	0	0	2	0	0	0	0	0	0	0	0	0	0	0	0	k__Bacteria; p__Bacteroidetes; c__Bacteroidia; o__Bacteroidales; f__Muribaculaceae
OTU_301	0	0	0	0	0	0	0	0	0	0	0	0	0	0	0	0	0	2	0	0	1	5	3	4	0	0	0	0	0	0	k__Bacteria; p__Proteobacteria; c__Deltaproteobacteria; o__Desulfovibrionales; f__Desulfovibrionaceae; g__Desulfovibrio
OTU_743	0	0	0	0	0	0	0	0	0	0	0	0	0	0	0	0	0	2	0	0	0	0	0	0	0	0	0	0	2	0	k__Bacteria; p__Bacteroidetes; c__Bacteroidia; o__Bacteroidales
OTU_852	0	0	0	0	0	0	0	0	0	0	0	0	0	0	0	0	0	1	1	0	0	0	1	2	0	2	2	0	0	0	k__Bacteria; p__Firmicutes; c__Clostridia; o__Clostridiales; f__Christensenellaceae; g__Christensenellaceae R-7 group
OTU_1052	0	0	0	0	0	0	0	0	0	0	0	0	0	0	0	0	0	0	1	1	0	0	0	0	0	0	0	0	0	2	k__Bacteria; p__Firmicutes; c__Erysipelotrichia; o__Erysipelotrichales; f__Erysipelotrichaceae; g__Erysipelatoclostridium
OTU_427	0	0	0	0	0	0	0	0	0	0	0	0	0	0	0	0	0	0	7	0	0	0	0	0	0	0	0	0	0	0	k__Bacteria; p__Firmicutes; c__Clostridia; o__Clostridiales; f__Ruminococcaceae
OTU_426	0	0	0	0	0	0	0	0	0	0	0	0	0	0	0	0	0	0	11	0	0	0	0	0	0	0	0	0	0	0	k__Bacteria; p__Firmicutes; c__Clostridia; o__Clostridiales; f__Ruminococcaceae; g__[Eubacterium] coprostanoligenes group
OTU_938	0	0	0	0	0	0	0	0	0	0	0	0	0	0	0	0	0	0	2	0	0	0	0	0	0	0	0	0	0	0	k__Bacteria
OTU_612	0	0	0	0	0	0	0	0	0	0	0	0	0	0	0	0	0	0	3	0	0	0	0	0	0	0	0	0	0	0	k__Bacteria; p__Bacteroidetes; c__Bacteroidia; o__Bacteroidales; f__Muribaculaceae; g__uncultured bacterium; s__uncultured bacterium
OTU_1151	0	0	0	0	0	0	0	0	0	0	0	0	0	0	0	0	0	0	1	8	0	0	0	2	0	0	0	0	0	0	k__Bacteria; p__Proteobacteria; c__Gammaproteobacteria; o__Enterobacteriales; f__Enterobacteriaceae; g__Plesiomonas; s__uncultured bacterium
OTU_648	0	0	0	0	0	0	0	0	0	0	0	0	0	0	0	0	0	0	1	0	0	0	2	0	0	0	0	0	0	0	k__Bacteria; p__Bacteroidetes; c__Bacteroidia; o__Bacteroidales; f__Muribaculaceae; g__uncultured bacterium; s__uncultured bacterium
OTU_1230	0	0	0	0	0	0	0	0	0	0	0	0	0	0	0	0	0	0	2	0	0	0	0	0	0	0	0	0	0	2	k__Bacteria; p__Bacteroidetes; c__Bacteroidia; o__Bacteroidales; f__Muribaculaceae; g__uncultured bacterium; s__uncultured bacterium
OTU_627	0	0	0	0	0	0	0	0	0	0	0	0	0	0	0	0	0	0	2	0	0	0	0	0	0	0	0	0	0	0	k__Bacteria; p__Bacteroidetes; c__Bacteroidia; o__Bacteroidales
OTU_535	0	0	0	0	0	0	0	0	0	0	0	0	0	0	0	0	0	0	0	8	0	0	0	0	0	0	0	0	0	0	k__Bacteria; p__Firmicutes; c__Clostridia; o__Clostridiales; f__Ruminococcaceae; g__Anaerofilum; s__uncultured bacterium
OTU_667	0	0	0	0	0	0	0	0	0	0	0	0	0	0	0	0	0	0	0	2	0	0	0	0	0	0	0	0	0	0	k__Bacteria; p__Bacteroidetes; c__Bacteroidia; o__Bacteroidales; f__Muribaculaceae
OTU_604	0	0	0	0	0	0	0	0	0	0	0	0	0	0	0	0	0	0	0	2	0	0	0	0	0	0	0	0	0	0	k__Bacteria; p__Bacteroidetes; c__Bacteroidia; o__Bacteroidales; f__Bacteroidaceae; g__Bacteroides; s__uncultured bacterium
OTU_844	0	0	0	0	0	0	0	0	0	0	0	0	0	0	0	0	0	0	0	2	0	0	0	0	0	0	0	0	0	0	k__Bacteria; p__Firmicutes; c__Clostridia; o__Clostridiales; f__Lachnospiraceae
OTU_982	0	0	0	0	0	0	0	0	0	0	0	0	0	0	0	0	0	0	0	2	0	0	0	0	2	0	0	0	0	0	k__Bacteria; p__Firmicutes; c__Clostridia; o__Clostridiales; f__Ruminococcaceae
OTU_962	0	0	0	0	0	0	0	0	0	0	0	0	0	0	0	0	0	0	0	1	0	0	1	0	0	0	0	18	0	11	k__Bacteria; p__Firmicutes; c__Bacilli; o__Lactobacillales; f__Streptococcaceae; g__Streptococcus; s__Streptococcus equinus
OTU_1150	0	0	0	0	0	0	0	0	0	0	0	0	0	0	0	0	0	0	0	0	2	0	0	0	0	0	0	0	0	0	k__Bacteria; p__Bacteroidetes; c__Bacteroidia; o__Bacteroidales; f__Muribaculaceae
OTU_1284	0	0	0	0	0	0	0	0	0	0	0	0	0	0	0	0	0	0	0	0	2	0	0	0	0	0	0	0	0	0	k__Bacteria; p__Bacteroidetes; c__Bacteroidia; o__Bacteroidales
OTU_1066	0	0	0	0	0	0	0	0	0	0	0	0	0	0	0	0	0	0	0	0	2	0	0	0	0	0	0	0	0	0	k__Bacteria; p__Firmicutes; c__Erysipelotrichia; o__Erysipelotrichales; f__Erysipelotrichaceae; g__Ileibacterium; s__Erysipelotrichaceae bacterium NYU-BL-F16
OTU_841	0	0	0	0	0	0	0	0	0	0	0	0	0	0	0	0	0	0	0	0	2	0	0	0	0	0	0	0	0	0	k__Bacteria; p__Firmicutes; c__Erysipelotrichia; o__Erysipelotrichales; f__Erysipelotrichaceae; g__Ileibacterium; s__Erysipelotrichaceae bacterium NYU-BL-F16
OTU_854	0	0	0	0	0	0	0	0	0	0	0	0	0	0	0	0	0	0	0	0	3	0	0	0	0	0	0	0	0	0	k__Bacteria; p__Firmicutes; c__Erysipelotrichia; o__Erysipelotrichales; f__Erysipelotrichaceae; g__Faecalibaculum; s__Faecalibaculum rodentium
OTU_1261	0	0	0	0	0	0	0	0	0	0	0	0	0	0	0	0	0	0	0	0	0	10	2	0	0	0	0	1	0	0	k__Bacteria; p__Firmicutes; c__Clostridia; o__Clostridiales; f__Ruminococcaceae; g__Ruminococcaceae UCG-005
OTU_1319	0	0	0	0	0	0	0	0	0	0	0	0	0	0	0	0	0	0	0	0	0	4	0	0	0	0	0	0	0	0	k__Bacteria; p__Firmicutes; c__Clostridia; o__Clostridiales; f__Ruminococcaceae; g__Ruminiclostridium 6
OTU_1306	0	0	0	0	0	0	0	0	0	0	0	0	0	0	0	0	0	0	0	0	0	2	0	0	0	0	0	0	0	0	k__Bacteria; p__Bacteroidetes; c__Bacteroidia; o__Bacteroidales
OTU_360	0	0	0	0	0	0	0	0	0	0	0	0	0	0	0	0	0	0	0	0	0	8	0	0	0	0	0	0	0	0	k__Bacteria; p__Bacteroidetes; c__Bacteroidia; o__Bacteroidales; f__Prevotellaceae; g__Prevotella 1; s__uncultured bacterium
OTU_1315	0	0	0	0	0	0	0	0	0	0	0	0	0	0	0	0	0	0	0	0	0	2	0	0	0	0	0	0	0	0	k__Bacteria; p__Firmicutes; c__Clostridia; o__Clostridiales; f__Clostridiaceae 1; g__Clostridium sensu stricto 1
OTU_897	0	0	0	0	0	0	0	0	0	0	0	0	0	0	0	0	0	0	0	0	0	3	0	0	0	0	0	0	0	0	k__Bacteria; p__Actinobacteria; c__Coriobacteriia; o__Coriobacteriales; f__Eggerthellaceae; g__Enterorhabdus; s__mouse gut metagenome
OTU_1122	0	0	0	0	0	0	0	0	0	0	0	0	0	0	0	0	0	0	0	0	0	2	0	0	0	0	0	0	0	0	k__Bacteria
OTU_670	0	0	0	0	0	0	0	0	0	0	0	0	0	0	0	0	0	0	0	0	0	3	0	0	0	0	0	0	0	0	k__Bacteria; p__Bacteroidetes; c__Bacteroidia; o__Bacteroidales
OTU_912	0	0	0	0	0	0	0	0	0	0	0	0	0	0	0	0	0	0	0	0	0	2	0	0	0	0	0	0	0	0	k__Bacteria; p__Actinobacteria; c__Actinobacteria; o__Propionibacteriales; f__Propionibacteriaceae; g__Cutibacterium; s__Propionibacterium sp. KPL1844
OTU_1330	0	0	0	0	0	0	0	0	0	0	0	0	0	0	0	0	0	0	0	0	0	0	2	0	0	0	0	0	0	0	k__Bacteria
OTU_470	0	0	0	0	0	0	0	0	0	0	0	0	0	0	0	0	0	0	0	0	0	0	5	6	0	0	0	0	0	0	k__Bacteria; p__Firmicutes; c__Negativicutes; o__Selenomonadales; f__Veillonellaceae; g__Veillonella
OTU_402	0	0	0	0	0	0	0	0	0	0	0	0	0	0	0	0	0	0	0	0	0	0	3	1	0	1	3	2	0	0	k__Bacteria; p__Firmicutes; c__Clostridia; o__Clostridiales; f__Ruminococcaceae; g__[Eubacterium] coprostanoligenes group; s__uncultured bacterium
OTU_829	0	0	0	0	0	0	0	0	0	0	0	0	0	0	0	0	0	0	0	0	0	0	2	0	0	0	0	0	0	0	k__Bacteria; p__Bacteroidetes; c__Bacteroidia; o__Bacteroidales; f__Muribaculaceae; g__uncultured bacterium; s__uncultured bacterium
OTU_1092	0	0	0	0	0	0	0	0	0	0	0	0	0	0	0	0	0	0	0	0	0	0	1	2	0	0	0	2	0	0	k__Bacteria; p__Firmicutes; c__Clostridia; o__Clostridiales; f__Christensenellaceae; g__Christensenellaceae R-7 group
OTU_464	0	0	0	0	0	0	0	0	0	0	0	0	0	0	0	0	0	0	0	0	0	0	3	0	0	0	0	0	0	0	k__Bacteria; p__Bacteroidetes; c__Bacteroidia; o__Bacteroidales; f__Muribaculaceae
OTU_778	0	0	0	0	0	0	0	0	0	0	0	0	0	0	0	0	0	0	0	0	0	0	1	0	0	0	1	0	0	0	k__Bacteria; p__Firmicutes; c__Clostridia; o__Clostridiales; f__Ruminococcaceae; g__Ruminococcus 1
OTU_1287	0	0	0	0	0	0	0	0	0	0	0	0	0	0	0	0	0	0	0	0	0	0	1	0	3	0	0	5	0	0	k__Bacteria; p__Firmicutes; c__Clostridia; o__Clostridiales; f__Christensenellaceae; g__Christensenellaceae R-7 group
OTU_1291	0	0	0	0	0	0	0	0	0	0	0	0	0	0	0	0	0	0	0	0	0	0	2	0	0	0	0	0	0	0	k__Bacteria; p__Firmicutes; c__Clostridia; o__Clostridiales; f__Ruminococcaceae
OTU_601	0	0	0	0	0	0	0	0	0	0	0	0	0	0	0	0	0	0	0	0	0	0	0	2	0	0	0	0	0	0	k__Bacteria; p__Bacteroidetes; c__Bacteroidia; o__Bacteroidales; f__Muribaculaceae; g__uncultured bacterium; s__uncultured bacterium
OTU_739	0	0	0	0	0	0	0	0	0	0	0	0	0	0	0	0	0	0	0	0	0	0	0	1	0	2	0	0	2	2	k__Bacteria; p__Bacteroidetes; c__Bacteroidia; o__Bacteroidales; f__Muribaculaceae; g__uncultured bacterium; s__uncultured bacterium
OTU_610	0	0	0	0	0	0	0	0	0	0	0	0	0	0	0	0	0	0	0	0	0	0	0	2	0	0	0	0	0	0	k__Bacteria; p__Bacteroidetes; c__Bacteroidia; o__Bacteroidales; f__Muribaculaceae
OTU_304	0	0	0	0	0	0	0	0	0	0	0	0	0	0	0	0	0	0	0	0	0	0	0	20	0	0	4	0	0	0	k__Bacteria; p__Firmicutes; c__Clostridia; o__Clostridiales; f__Ruminococcaceae; g__[Eubacterium] coprostanoligenes group
OTU_611	0	0	0	0	0	0	0	0	0	0	0	0	0	0	0	0	0	0	0	0	0	0	0	3	0	0	0	0	0	0	k__Bacteria; p__Bacteroidetes; c__Bacteroidia; o__Bacteroidales; f__Bacteroidaceae; g__Bacteroides
OTU_440	0	0	0	0	0	0	0	0	0	0	0	0	0	0	0	0	0	0	0	0	0	0	0	3	0	4	0	0	0	0	k__Bacteria; p__Firmicutes; c__Clostridia; o__Clostridiales; f__Ruminococcaceae; g__[Eubacterium] coprostanoligenes group; s__uncultured bacterium
OTU_407	0	0	0	0	0	0	0	0	0	0	0	0	0	0	0	0	0	0	0	0	0	0	0	4	0	0	0	0	0	0	k__Bacteria; p__Firmicutes; c__Clostridia; o__Clostridiales; f__Christensenellaceae
OTU_1242	0	0	0	0	0	0	0	0	0	0	0	0	0	0	0	0	0	0	0	0	0	0	0	2	0	1	0	0	0	1	k__Bacteria
OTU_828	0	0	0	0	0	0	0	0	0	0	0	0	0	0	0	0	0	0	0	0	0	0	0	2	0	0	0	0	0	0	k__Bacteria
OTU_598	0	0	0	0	0	0	0	0	0	0	0	0	0	0	0	0	0	0	0	0	0	0	0	3	0	0	0	0	0	0	k__Bacteria; p__Tenericutes; c__Mollicutes; o__Mollicutes RF39
OTU_749	0	0	0	0	0	0	0	0	0	0	0	0	0	0	0	0	0	0	0	0	0	0	0	1	6	1	0	1	0	5	k__Bacteria; p__Firmicutes; c__Clostridia; o__Clostridiales; f__Lachnospiraceae
OTU_1063	0	0	0	0	0	0	0	0	0	0	0	0	0	0	0	0	0	0	0	0	0	0	0	2	0	0	0	0	0	0	k__Bacteria
OTU_1143	0	0	0	0	0	0	0	0	0	0	0	0	0	0	0	0	0	0	0	0	0	0	0	3	0	0	0	0	0	0	k__Bacteria; p__Firmicutes; c__Clostridia; o__Clostridiales; f__Lachnospiraceae
OTU_837	0	0	0	0	0	0	0	0	0	0	0	0	0	0	0	0	0	0	0	0	0	0	0	2	0	0	0	0	0	0	k__Bacteria; p__Bacteroidetes; c__Bacteroidia; o__Bacteroidales; f__Muribaculaceae; g__uncultured bacterium; s__uncultured bacterium
OTU_1062	0	0	0	0	0	0	0	0	0	0	0	0	0	0	0	0	0	0	0	0	0	0	0	1	2	0	0	0	0	0	k__Bacteria; p__Firmicutes; c__Clostridia; o__Clostridiales; f__Family XIII; g__Family XIII AD3011 group; s__uncultured bacterium
OTU_1181	0	0	0	0	0	0	0	0	0	0	0	0	0	0	0	0	0	0	0	0	0	0	0	2	0	0	0	0	0	0	k__Bacteria; p__Proteobacteria; c__Deltaproteobacteria; o__Desulfovibrionales; f__Desulfovibrionaceae
OTU_1187	0	0	0	0	0	0	0	0	0	0	0	0	0	0	0	0	0	0	0	0	0	0	0	3	0	0	0	0	0	0	k__Bacteria; p__Bacteroidetes; c__Bacteroidia; o__Bacteroidales; f__Muribaculaceae; g__uncultured bacterium; s__uncultured bacterium
OTU_1089	0	0	0	0	0	0	0	0	0	0	0	0	0	0	0	0	0	0	0	0	0	0	0	2	0	0	1	0	0	1	k__Bacteria; p__Bacteroidetes; c__Bacteroidia; o__Bacteroidales; f__Muribaculaceae; g__uncultured bacterium; s__uncultured bacterium
OTU_838	0	0	0	0	0	0	0	0	0	0	0	0	0	0	0	0	0	0	0	0	0	0	0	2	0	0	0	0	0	0	k__Bacteria; p__Bacteroidetes; c__Bacteroidia; o__Bacteroidales; f__Muribaculaceae; g__uncultured bacterium; s__uncultured bacterium
OTU_1331	0	0	0	0	0	0	0	0	0	0	0	0	0	0	0	0	0	0	0	0	0	0	0	2	0	0	0	0	0	0	k__Bacteria; p__Bacteroidetes; c__Bacteroidia; o__Bacteroidales
OTU_1184	0	0	0	0	0	0	0	0	0	0	0	0	0	0	0	0	0	0	0	0	0	0	0	3	0	0	0	0	0	0	k__Bacteria
OTU_1100	0	0	0	0	0	0	0	0	0	0	0	0	0	0	0	0	0	0	0	0	0	0	0	0	2	0	0	0	0	0	k__Bacteria; p__Bacteroidetes; c__Bacteroidia; o__Bacteroidales; f__Muribaculaceae; g__uncultured bacterium; s__uncultured bacterium
OTU_668	0	0	0	0	0	0	0	0	0	0	0	0	0	0	0	0	0	0	0	0	0	0	0	0	2	0	0	0	0	1	k__Bacteria
OTU_586	0	0	0	0	0	0	0	0	0	0	0	0	0	0	0	0	0	0	0	0	0	0	0	0	5	0	0	2	0	0	k__Bacteria; p__Firmicutes; c__Clostridia; o__Clostridiales; f__Christensenellaceae; g__Christensenellaceae R-7 group
OTU_833	0	0	0	0	0	0	0	0	0	0	0	0	0	0	0	0	0	0	0	0	0	0	0	0	2	0	0	0	0	0	k__Bacteria; p__Firmicutes; c__Clostridia; o__Clostridiales; f__Ruminococcaceae; g__Anaerotruncus; s__Anaerotruncus colihominis DSM 17241
OTU_1056	0	0	0	0	0	0	0	0	0	0	0	0	0	0	0	0	0	0	0	0	0	0	0	0	2	0	0	0	0	0	k__Bacteria; p__Bacteroidetes; c__Bacteroidia; o__Bacteroidales; f__Muribaculaceae; g__uncultured bacterium; s__uncultured bacterium
OTU_1090	0	0	0	0	0	0	0	0	0	0	0	0	0	0	0	0	0	0	0	0	0	0	0	0	4	0	0	0	0	0	k__Bacteria; p__Firmicutes; c__Clostridia; o__Clostridiales; f__Lachnospiraceae; g__Lachnospiraceae AC2044 group; s__uncultured bacterium
OTU_1054	0	0	0	0	0	0	0	0	0	0	0	0	0	0	0	0	0	0	0	0	0	0	0	0	3	0	0	0	0	0	k__Bacteria
OTU_1055	0	0	0	0	0	0	0	0	0	0	0	0	0	0	0	0	0	0	0	0	0	0	0	0	2	0	0	0	0	0	k__Bacteria; p__Firmicutes; c__Clostridia; o__Clostridiales
OTU_1057	0	0	0	0	0	0	0	0	0	0	0	0	0	0	0	0	0	0	0	0	0	0	0	0	2	0	0	3	0	0	k__Bacteria; p__Firmicutes; c__Clostridia; o__Clostridiales; f__Ruminococcaceae; g__Ruminococcaceae UCG-013; s__uncultured bacterium
OTU_718	0	0	0	0	0	0	0	0	0	0	0	0	0	0	0	0	0	0	0	0	0	0	0	0	2	0	0	0	0	0	k__Bacteria; p__Bacteroidetes; c__Bacteroidia; o__Bacteroidales; f__Muribaculaceae; g__Muribaculum; s__Parabacteroides sp. YL27
OTU_720	0	0	0	0	0	0	0	0	0	0	0	0	0	0	0	0	0	0	0	0	0	0	0	0	3	0	0	0	0	0	k__Bacteria
OTU_1060	0	0	0	0	0	0	0	0	0	0	0	0	0	0	0	0	0	0	0	0	0	0	0	0	2	0	0	0	0	0	k__Bacteria; p__Firmicutes; c__Clostridia; o__Clostridiales
OTU_1088	0	0	0	0	0	0	0	0	0	0	0	0	0	0	0	0	0	0	0	0	0	0	0	0	2	0	0	0	0	0	k__Bacteria; p__Firmicutes; c__Clostridia; o__Clostridiales
OTU_624	0	0	0	0	0	0	0	0	0	0	0	0	0	0	0	0	0	0	0	0	0	0	0	0	2	0	0	0	0	0	k__Bacteria; p__Bacteroidetes; c__Bacteroidia; o__Bacteroidales
OTU_622	0	0	0	0	0	0	0	0	0	0	0	0	0	0	0	0	0	0	0	0	0	0	0	0	2	0	0	0	0	0	k__Bacteria; p__Firmicutes; c__Clostridia; o__Clostridiales; f__Lachnospiraceae
OTU_620	0	0	0	0	0	0	0	0	0	0	0	0	0	0	0	0	0	0	0	0	0	0	0	0	2	0	0	0	0	0	k__Bacteria; p__Firmicutes; c__Clostridia; o__Clostridiales; f__Lachnospiraceae
OTU_421	0	0	0	0	0	0	0	0	0	0	0	0	0	0	0	0	0	0	0	0	0	0	0	0	1	0	1	1	4	0	k__Bacteria; p__Firmicutes; c__Clostridia; o__Clostridiales; f__Lachnospiraceae; g__[Ruminococcus] gauvreauii group; s__Ruminococcus gauvreauii
OTU_1097	0	0	0	0	0	0	0	0	0	0	0	0	0	0	0	0	0	0	0	0	0	0	0	0	2	0	0	0	0	0	k__Bacteria; p__Firmicutes; c__Clostridia; o__Clostridiales; f__Lachnospiraceae; g__uncultured; s__uncultured bacterium
OTU_725	0	0	0	0	0	0	0	0	0	0	0	0	0	0	0	0	0	0	0	0	0	0	0	0	2	0	0	0	0	0	k__Bacteria
OTU_957	0	0	0	0	0	0	0	0	0	0	0	0	0	0	0	0	0	0	0	0	0	0	0	0	2	0	0	0	0	0	k__Bacteria; p__Firmicutes; c__Clostridia; o__Clostridiales; f__Ruminococcaceae; g__Ruminiclostridium 5
OTU_1102	0	0	0	0	0	0	0	0	0	0	0	0	0	0	0	0	0	0	0	0	0	0	0	0	0	14	1	1	1	0	k__Bacteria; p__Bacteroidetes; c__Bacteroidia; o__Bacteroidales; f__Muribaculaceae
OTU_583	0	0	0	0	0	0	0	0	0	0	0	0	0	0	0	0	0	0	0	0	0	0	0	0	0	4	0	0	0	0	k__Bacteria; p__Bacteroidetes; c__Bacteroidia; o__Bacteroidales; f__Bacteroidaceae; g__Bacteroides
OTU_566	0	0	0	0	0	0	0	0	0	0	0	0	0	0	0	0	0	0	0	0	0	0	0	0	0	3	0	0	0	0	k__Bacteria; p__Firmicutes; c__Clostridia; o__Clostridiales; f__Lachnospiraceae
OTU_1067	0	0	0	0	0	0	0	0	0	0	0	0	0	0	0	0	0	0	0	0	0	0	0	0	0	4	0	0	0	0	k__Bacteria
OTU_1069	0	0	0	0	0	0	0	0	0	0	0	0	0	0	0	0	0	0	0	0	0	0	0	0	0	3	0	0	0	0	k__Bacteria; p__Bacteroidetes; c__Bacteroidia; o__Bacteroidales
OTU_637	0	0	0	0	0	0	0	0	0	0	0	0	0	0	0	0	0	0	0	0	0	0	0	0	0	2	0	0	0	0	k__Bacteria; p__Bacteroidetes; c__Bacteroidia; o__Bacteroidales
OTU_1222	0	0	0	0	0	0	0	0	0	0	0	0	0	0	0	0	0	0	0	0	0	0	0	0	0	2	0	0	0	0	k__Bacteria; p__Bacteroidetes; c__Bacteroidia; o__Bacteroidales
OTU_968	0	0	0	0	0	0	0	0	0	0	0	0	0	0	0	0	0	0	0	0	0	0	0	0	0	0	2	0	0	0	k__Bacteria; p__Acidobacteria; c__Subgroup 6
OTU_547	0	0	0	0	0	0	0	0	0	0	0	0	0	0	0	0	0	0	0	0	0	0	0	0	0	0	3	0	0	0	k__Bacteria; p__Actinobacteria; c__Thermoleophilia; o__Gaiellales
OTU_562	0	0	0	0	0	0	0	0	0	0	0	0	0	0	0	0	0	0	0	0	0	0	0	0	0	0	3	6	0	0	k__Bacteria; p__Firmicutes; c__Clostridia; o__Clostridiales; f__Lachnospiraceae; g__uncultured; s__Clostridium sp. Culture-27
OTU_339	0	0	0	0	0	0	0	0	0	0	0	0	0	0	0	0	0	0	0	0	0	0	0	0	0	0	3	8	3	0	k__Bacteria; p__Firmicutes; c__Clostridia; o__Clostridiales; f__Ruminococcaceae; g__Ruminococcaceae UCG-010
OTU_1333	0	0	0	0	0	0	0	0	0	0	0	0	0	0	0	0	0	0	0	0	0	0	0	0	0	0	2	0	0	0	k__Bacteria; p__Bacteroidetes; c__Bacteroidia; o__Bacteroidales
OTU_1106	0	0	0	0	0	0	0	0	0	0	0	0	0	0	0	0	0	0	0	0	0	0	0	0	0	0	0	3	0	0	k__Bacteria; p__Bacteroidetes; c__Bacteroidia; o__Bacteroidales; f__Muribaculaceae; g__uncultured bacterium; s__uncultured bacterium
OTU_613	0	0	0	0	0	0	0	0	0	0	0	0	0	0	0	0	0	0	0	0	0	0	0	0	0	0	0	2	1	0	k__Bacteria; p__Firmicutes; c__Clostridia; o__Clostridiales
OTU_953	0	0	0	0	0	0	0	0	0	0	0	0	0	0	0	0	0	0	0	0	0	0	0	0	0	0	0	3	5	0	k__Bacteria; p__Bacteroidetes; c__Bacteroidia; o__Bacteroidales; f__Muribaculaceae; g__uncultured bacterium; s__uncultured bacterium
OTU_1093	0	0	0	0	0	0	0	0	0	0	0	0	0	0	0	0	0	0	0	0	0	0	0	0	0	0	0	2	0	0	k__Bacteria; p__Firmicutes; c__Clostridia; o__Clostridiales; f__Lachnospiraceae
OTU_1194	0	0	0	0	0	0	0	0	0	0	0	0	0	0	0	0	0	0	0	0	0	0	0	0	0	0	0	4	0	0	k__Bacteria; p__Chloroflexi; c__Anaerolineae; o__Anaerolineales; f__Anaerolineaceae; g__uncultured; s__uncultured prokaryote
OTU_1091	0	0	0	0	0	0	0	0	0	0	0	0	0	0	0	0	0	0	0	0	0	0	0	0	0	0	0	2	0	0	k__Bacteria; p__Firmicutes; c__Clostridia; o__Clostridiales; f__Lachnospiraceae; g__Blautia; s__Lachnospiraceae bacterium 28-4
OTU_1099	0	0	0	0	0	0	0	0	0	0	0	0	0	0	0	0	0	0	0	0	0	0	0	0	0	0	0	2	0	0	k__Bacteria; p__Bacteroidetes; c__Bacteroidia; o__Bacteroidales; f__Bacteroidaceae; g__Bacteroides
OTU_772	0	0	0	0	0	0	0	0	0	0	0	0	0	0	0	0	0	0	0	0	0	0	0	0	0	0	0	2	0	0	k__Bacteria
OTU_290	0	0	0	0	0	0	0	0	0	0	0	0	0	0	0	0	0	0	0	0	0	0	0	0	0	0	0	0	15	1	k__Bacteria; p__Firmicutes; c__Clostridia; o__Clostridiales; f__Clostridiaceae 1; g__Candidatus Arthromitus; s__uncultured bacterium
OTU_1101	0	0	0	0	0	0	0	0	0	0	0	0	0	0	0	0	0	0	0	0	0	0	0	0	0	0	0	0	2	0	k__Bacteria
OTU_740	0	0	0	0	0	0	0	0	0	0	0	0	0	0	0	0	0	0	0	0	0	0	0	0	0	0	0	0	2	0	k__Bacteria; p__Bacteroidetes; c__Bacteroidia; o__Bacteroidales
OTU_556	0	0	0	0	0	0	0	0	0	0	0	0	0	0	0	0	0	0	0	0	0	0	0	0	0	0	0	0	3	0	k__Bacteria; p__Firmicutes; c__Clostridia; o__Clostridiales; f__Lachnospiraceae
OTU_942	0	0	0	0	0	0	0	0	0	0	0	0	0	0	0	0	0	0	0	0	0	0	0	0	0	0	0	0	3	0	k__Bacteria; p__Firmicutes; c__Clostridia; o__Clostridiales; f__Lachnospiraceae
OTU_455	0	0	0	0	0	0	0	0	0	0	0	0	0	0	0	0	0	0	0	0	0	0	0	0	0	0	0	0	4	0	k__Bacteria; p__Firmicutes; c__Clostridia; o__Clostridiales; f__Lachnospiraceae; g__Tyzzerella 3; s__unidentified
OTU_952	0	0	0	0	0	0	0	0	0	0	0	0	0	0	0	0	0	0	0	0	0	0	0	0	0	0	0	0	2	0	k__Bacteria; p__Bacteroidetes; c__Bacteroidia; o__Bacteroidales; f__Muribaculaceae; g__uncultured bacterium; s__uncultured bacterium
OTU_1196	0	0	0	0	0	0	0	0	0	0	0	0	0	0	0	0	0	0	0	0	0	0	0	0	0	0	0	0	2	0	k__Bacteria; p__Bacteroidetes; c__Bacteroidia; o__Bacteroidales; f__Bacteroidaceae; g__Bacteroides
OTU_1141	0	0	0	0	0	0	0	0	0	0	0	0	0	0	0	0	0	0	0	0	0	0	0	0	0	0	0	0	0	2	k__Bacteria; p__Bacteroidetes; c__Bacteroidia; o__Bacteroidales
OTU_498	0	0	0	0	0	0	0	0	0	0	0	0	0	0	0	0	0	0	0	0	0	0	0	0	0	0	0	0	0	3	k__Bacteria
OTU_747	0	0	0	0	0	0	0	0	0	0	0	0	0	0	0	0	0	0	0	0	0	0	0	0	0	0	0	0	0	2	k__Bacteria; p__Firmicutes; c__Clostridia; o__Clostridiales
OTU_1139	0	0	0	0	0	0	0	0	0	0	0	0	0	0	0	0	0	0	0	0	0	0	0	0	0	0	0	0	0	2	k__Bacteria
OTU_791	0	0	0	0	0	0	0	0	0	0	0	0	0	0	0	0	0	0	0	0	0	0	0	0	0	0	0	0	0	2	k__Bacteria; p__Firmicutes; c__Clostridia; o__Clostridiales; f__Lachnospiraceae
OTU_1269	0	0	0	0	0	0	0	0	0	0	0	0	0	0	0	0	0	0	0	0	0	0	0	0	0	0	0	0	0	3	k__Bacteria; p__Firmicutes; c__Clostridia; o__Clostridiales; f__Ruminococcaceae
OTU_1252	0	0	0	0	0	0	0	0	0	0	0	0	0	0	0	0	0	0	0	0	0	0	0	0	0	0	0	0	0	2	k__Bacteria; p__Bacteroidetes; c__Bacteroidia; o__Bacteroidales
OTU_1083	0	0	0	0	0	0	0	0	0	0	0	0	0	0	0	0	0	0	0	0	0	0	0	0	0	0	0	0	0	2	k__Bacteria; p__Firmicutes; c__Clostridia; o__Clostridiales; f__Ruminococcaceae; g__Ruminiclostridium 9
OTU_1288	0	0	0	0	0	0	0	0	0	0	0	0	0	0	0	0	0	0	0	0	0	0	0	0	0	0	0	0	0	2	k__Bacteria
OTU_1094	0	0	0	0	0	0	0	0	0	0	0	0	0	0	0	0	0	0	0	0	0	0	0	0	0	0	0	0	0	2	k__Bacteria
OTU_1146	0	0	0	0	0	0	0	0	0	0	0	0	0	0	0	0	0	0	0	0	0	0	0	0	0	0	0	0	0	2	k__Bacteria; p__Firmicutes; c__Clostridia; o__Clostridiales; f__Ruminococcaceae
OTU_1275	0	0	0	0	0	0	0	0	0	0	0	0	0	0	0	0	0	0	0	0	0	0	0	0	0	0	0	0	0	2	k__Bacteria; p__Bacteroidetes; c__Bacteroidia; o__Bacteroidales; f__Bacteroidaceae; g__Bacteroides
OTU_1318	0	0	0	0	0	0	0	0	0	0	0	0	0	0	0	0	0	0	0	0	0	0	0	0	0	0	0	0	0	3	k__Bacteria; p__Bacteroidetes; c__Bacteroidia; o__Bacteroidales
OTU_492	0	0	0	0	0	0	0	0	0	0	0	0	0	0	0	0	0	0	0	0	0	0	0	0	0	0	0	0	0	3	k__Bacteria; p__Bacteroidetes; c__Bacteroidia; o__Bacteroidales; f__Muribaculaceae; g__uncultured bacterium; s__uncultured bacterium
OTU_955	0	0	0	0	0	0	0	0	0	0	0	0	0	0	0	0	0	0	0	0	0	0	0	0	0	0	0	0	0	2	k__Bacteria; p__Bacteroidetes; c__Bacteroidia; o__Bacteroidales
OTU_954	0	0	0	0	0	0	0	0	0	0	0	0	0	0	0	0	0	0	0	0	0	0	0	0	0	0	0	0	0	2	k__Bacteria; p__Bacteroidetes; c__Bacteroidia; o__Bacteroidales; f__Muribaculaceae
OTU_1145	0	0	0	0	0	0	0	0	0	0	0	0	0	0	0	0	0	0	0	0	0	0	0	0	0	0	0	0	0	2	k__Bacteria
OTU_1178	0	0	0	0	0	0	0	0	0	0	0	0	0	0	0	0	0	0	0	0	0	0	0	0	0	0	0	0	0	3	k__Bacteria; p__Bacteroidetes; c__Bacteroidia; o__Bacteroidales; f__Muribaculaceae; g__uncultured bacterium; s__uncultured bacterium
OTU_1082	0	0	0	0	0	0	0	0	0	0	0	0	0	0	0	0	0	0	0	0	0	0	0	0	0	0	0	0	0	2	k__Bacteria; p__Bacteroidetes; c__Bacteroidia; o__Bacteroidales; f__Muribaculaceae

## Sheet: Figure 8E
	Bacteroidetes	Firmicutes	Verrucomicrobia	Actinobacteria	Proteobacteria	Deferribacteres	Epsilonbacteraeota	Tenericutes	Fusobacteria	Cyanobacteria	Others
NC	0.39414	0.54418	0.00032	0.05045	0.0078	0.00043	0.000619	0.00042	0.000103	0.000169	0.00138
DSS	0.36767	0.08929	0.4257	0.09363	0.01626	0.00021	1.48e-05	0.00039	2.24e-05	7.38e-05	0.00673
DSS+SASP	0.56402	0.25833	0.1385	0.02461	0.00832	0.00043	2.38e-05	0.00116	0	0.000131	0.00448
DSS+TP-L	0.57513	0.28136	0.06382	0.04589	0.00974	0.01588	4.8e-05	0.00013	0.000505	0.000132	0.00737
DSS+TP-M	0.58663	0.33864	0.02138	0.03354	0.00717	0.00404	0.00307	0.00011	7.48e-06	0.000123	0.00529
DSS+TP-H	0.57167	0.2814	0.06934	0.02938	0.00768	0.00044	0.012	0.0023	0.000653	0.000125	0.02501

## Sheet: Figure 8F
Bacteroidetes
	NC	DSS	DSS+SASP	DSS+TP-L	DSS+TP-M	DSS+TP-H
	0.370803	0.477052	0.463193	0.521069	0.567151	0.697053
	0.468184	0.275784	0.579942	0.638973	0.712114	0.853653
	0.334257	0.310908	0.462916	0.501781	0.356803	0.599648
	0.335775	0.37974	0.628065	0.714216	0.622425	0.229829
	0.461666	0.394869	0.685981	0.49962	0.674679	0.478174
Firmicutes
	NC	DSS	DSS+SASP	DSS+TP-L	DSS+TP-M	DSS+TP-H
	0.579635	0.195143	0.390053	0.267191	0.396684	0.239999
	0.498068	0.0311657	0.126666	0.136478	0.172075	0.0808492
	0.541082	0.0533941	0.445477	0.405264	0.576999	0.30167
	0.601549	0.0685167	0.230357	0.192491	0.250172	0.468895
	0.500573	0.0982536	0.0991198	0.405378	0.297251	0.315566
Verrucomicrobia
	NC	DSS	DSS+SASP	DSS+TP-L	DSS+TP-M	DSS+TP-H
	0.00014502	0.287876	0.19822	0.0896518	0.0169003	0.0157521
	0.00017564	0.681105	0.231052	0.0575977	0.0265956	0.0162943
	0.00102882	0.347808	0.0511855	0.0367614	0.0134798	0.0214239
	0.00016697	0.491398	0.121151	0.110235	0.0385858	0.114798
	6.37e-05	0.320335	0.0908974	0.0248697	0.0113634	0.178449
Actinobacteria
	NC	DSS	DSS+SASP	DSS+TP-L	DSS+TP-M	DSS+TP-H
	0.0427997	0.0996361	0.0393329	0.0514355	0.0222883	0.0322218
	0.0361339	0.0881682	0.0251966	0.0740725	0.0597675	0.0234321
	0.0964153	0.0821412	0.0324697	0.0767124	0.0246522	0.0520545
	0.05151	0.0747665	0.0222287	0.0110001	0.0411879	0.0201252
	0.0253791	0.123428	0.00382138	0.0162177	0.0197863	0.0190523
Proteobacteria
	NC	DSS	DSS+SASP	DSS+TP-L	DSS+TP-M	DSS+TP-H
	0.00571025	0.00839432	0.00527606	0.0149867	0.00905551	0.00512347
	0.0116535	0.0128654	0.00400561	0.0121429	0.00606567	0.00883726
	0.00492252	0.0139061	0.00711134	0.00478854	0.00807798	0.0114722
	0.00859892	0.0204688	0.00515369	0.00717389	0.00551953	0.00395855
	0.00811282	0.0256463	0.0200515	0.00958708	0.007153	0.00901284
