# Supplementary material for: Thyme (Thymus vulgaris L.) polyphenols ameliorate DSS-induced ulcerative colitis of mice by mitigating intestinal barrier damage, regulating gut microbiota, and suppressing TLR4/NF-κB-NLRP3 inflammasome pathways
Source: Royal Society of Chemistry journal article supplement (doi:10.1039/d2fo02523j), 2022-12-12
Supplement: d2fo02523j10.xlsx [file d2fo02523j10.xlsx]

## Sheet: Relative Abundance of Genus
Relative Abundance of Genus
	Bacteroides	Akkermansia	Rikenellaceae RC9 gut group	Faecalibaculum	Coriobacteriaceae UCG 002	Parabacteroides	Blautia	Alloprevotella	Romboutsia	Dubosiella	Muribaculum	Clostridium sensu stricto 1	Mucispirillum	Escherichia-Shigella	Lactobacillus	Bifidobacterium	Uncultured bacterium	Others
NC_1	0.0170098	0.000144456	0.0451427	0.234904	0.0182051	0.0563741	0.0141206	5.42e-05	0.0722824	0.00893824	0.00384615	0.0265619	0.000108342	0.00117371	0.0136873	0.00764753	0.211972	0.267827
NC_2	0.0320647	0.000177014	0.0179542	0.0537615	0.00816323	0.0293084	0.0148691	0.00273107	0.00551271	0.00447591	0.00639777	0.00958402	0	0.00189657	0.00886901	0.00361613	0.31425	0.486369
NC_3	0.0925105	0.00102596	0.0299424	0.152443	0.00609265	0.0436903	0.0262016	0.00512982	0.00170468	0.0137219	0.01067	0.0998816	0	0.000284113	0.0158885	0.00375661	0.0930945	0.403962
NC_4	0.0463879	0.000166938	0.0448646	0.0592004	0.00528396	0.0827178	0.100497	8.35e-05	0.00582196	0.00667752	0.00557155	0.0375819	0.000187805	0.000333876	0.00727616	0.00413171	0.11237	0.480846
NC_5	0.102793	6.37e-05	0.0600755	0.111217	0.0116342	0.113021	0.0735931	0.00899754	0.0139419	0.00734233	0.0113955	0.0152364	0.00184619	4.24e-05	0.00403718	0.00396825	0.105573	0.355222
DSS_1	0.16097	0.187559	0.0123553	0.0620525	0.00189032	0.00958803	0.00586585	0.0131543	0.0331878	0.0102311	0.0252173	0.095471	0.000584636	0.00457965	0.000915929	0.000954905	0.349905	0.0255182
DSS_2	0.00201602	0.677049	0.115764	0.00972867	0.000924779	0.00599257	0.000147965	7.4e-05	0.00617752	0.00140566	0.0110912	0.0155672	0.000129469	0.00844389	0.000221947	0.000462389	0.124956	0.019848
DSS_3	0.0146016	0.345508	0.152951	0.012213	0.000982432	0.0249414	0.00400678	0.150928	0.00506627	0.00235013	0.013754	0.0396317	5.78e-05	0.0102096	0.0038912	0.00100169	0.141547	0.0763577
DSS_4	0.0530069	0.489723	0.127114	0.0279517	0.000903174	0.0170824	0.0013859	0.000840886	0.00118347	0.00345698	0.0277996	0.0526021	0.000218007	0.0140487	0.00132362	0.00079417	0.142047	0.0385186
DSS_5	0.00926168	0.118983	0.048901	0.0566951	0.000668536	0.00697887	0.00148383	0.00821811	0.00495695	0.0050874	0.0394763	0.259523	6.52e-05	0.0288775	0.000717454	0.000472867	0.352009	0.0576246
DSS+SASP_1	0.0609537	0.0985155	0.165142	0.0159194	0.000474834	0.0168191	0.085695	2.5e-05	0.022992	0.0236167	0.00449843	0.0356375	0.000624781	0.000174939	0.00149947	0.00237417	0.169691	0.295347
DSS+SASP_2	0.0223251	0.231056	0.318714	0.00752781	0.000627318	0.0731932	0.0209044	1.85e-05	0.00503699	0.0069743	0.00702965	0.0231923	0.000166055	5.54e-05	0.000774922	0.000645768	0.12991	0.151848
DSS+SASP_3	0.0139697	0.0511255	0.144692	0.00317419	0.00107955	0.0696711	0.0348033	0	0.00246524	0.0039476	0.0144208	0.0280199	0.000435042	0.000145014	0.00194963	0.00096676	0.16219	0.466945
DSS+SASP_4	0.12148	0.0112858	0.00965772	0.00442183	0.000148011	0.0281961	0.00153561	0.131508	0.000388529	0.00201665	0.0222572	0.0176318	0.000851064	0.000277521	0.0012951	0.000758557	0.368844	0.277447
DSS+SASP_5	0.0586393	0.0906988	0.0427788	0.000235637	0.00313911	0.0646716	4.28e-05	8.57e-05	0.00659783	0	0.00880425	0.00276338	6.43e-05	0.0126299	0.000814018	0.000235637	0.0742899	0.633509
DSS+TP-L_1	0.136613	0.000968514	0.134659	0.130186	0.00167289	0.0325069	0.022628	0.0111819	0.0344439	0.0166584	0.027136	0.0415052	0.00459604	0.00961471	0.00119744	0.00355709	0.175548	0.215327
DSS+TP-L_2	0.188017	0.00760563	0.135796	0.04	0.000130011	0.0252871	0.00147346	0.108017	0.00255688	0.00827736	0.00884074	0.0681907	0.0121517	0.00056338	0.00145179	0.00127844	0.264724	0.125638
DSS+TP-L_3	0.073587	0.00677699	0.0213677	0.168542	0.000134388	0.0340769	0.00520273	0.0845684	0.0120565	0.0258985	0.0123829	0.0704385	0.0226302	0.00299493	0.00186223	0.00270696	0.229554	0.22522
DSS+TP-L_4	0.186153	0.0102679	0.0478189	0.00503238	0.00187304	0.0167671	0.0648568	0	0.00469388	0.00155711	0.00843996	0.00911696	0.00428768	0.00227924	0.000112834	9.03e-05	0.45885	0.177803
DSS+TP-L_5	0.178545	0.00487614	0.055662	0.0126039	0.00537681	0.0212025	0.156363	0	0.00809787	0.00674823	0.00372241	0.0133441	0.0477435	0.00143672	0.000326527	0.00111019	0.211024	0.271818
DSS+TP-M_1	0.0389207	0.00686284	0.0739118	0.011319	0.00265112	0.0136881	0.184244	0	0.000263232	0.0100028	0.00543386	0.00761493	0.00676883	0.00112814	0.00203065	0.00222215	0.359387	0.273551
DSS+TP-M_2	0.44345	0.026676	0.0161655	0.0667876	0.0029445	0.0531961	0.0828751	0	0.0304785	0.0105495	0.0126165	0.0714091	0.000955501	0.0028665	0.000721501	0.0039	0.141551	0.0328575
DSS+TP-M_3	0.137375	0.0134405	0.0465041	0.0486949	0.00443537	0.0201876	0.203677	6.72e-05	0.0193274	0.00881697	0.00467729	0.01547	0.00329292	0.00118276	0.00141125	0.00422572	0.148827	0.318387
DSS+TP-M_4	0.177337	0.0586193	0.0678895	0.136489	0.00197239	0.0655227	0.0733728	7.89e-05	0.0087574	0.00956608	0.0136884	0.0544181	0.00035503	0.00187377	0.000769231	0.00272189	0.248777	0.0777909
DSS+TP-M_5	0.178548	0.00138351	0.0799634	0.0325126	0.000990895	0.01778	0.0466095	0.056481	0.0195749	0.00983417	0.00706714	0.0057958	0.00882457	0.00228093	0.000467403	0.00193308	0.25036	0.279593
DSS+TP-H_1	0.107721	0.0156772	0.0359935	0.0788112	0.00267952	0.0749247	0.00345938	0.0615289	0.0741049	0.00511908	0.00243956	0.0148373	0.000579896	0.00321942	0.00289948	0.000679878	0.342798	0.172527
DSS+TP-H_2	0.00816791	0.00605104	0.203199	0.120649	0.000379438	0.0349527	0.00169749	0.0434157	0.031503	0.011463	0.00163758	0.0191117	0.000838759	0.00421376	0.000659025	0.00105843	0.457255	0.0537465
DSS+TP-H_3	0.0293757	0.0213582	0.0872508	0.0893757	0.000613363	0.0868018	0.00127054	0.0437459	0.0452355	0.0206353	0.00512596	0.0444469	0.000219058	0.000306681	0.000722892	0.00223439	0.275838	0.245444
DSS+TP-H_4	0.0597204	0.274976	0.0285639	0.365359	0.000231474	0.0489349	0.00157402	9.26e-05	0.0597836	0.0293201	0.00328694	0.0172217	0.000246906	0.00124996	0.000370359	0.00108021	0.0891479	0.0188398
DSS+TP-H_5	0.163157	0.178631	0.0351505	0.187981	0.000261666	0.0216659	0.00973397	5.23e-05	0.065966	0.0210554	0.00864806	0.0158395	0.000313999	0.0021631	0.000261666	0.00148277	0.187824	0.0998125

## Sheet: g_Faecalibaculum
g_Faecalibaculum
Relative abundance	NC	DSS	DSS+SASP	DSS+TP-L	DSS+TP-M	DSS+TP-H
	23.4904	6.20525	1.59194	13.0186	1.1319	7.88112
	5.37615	0.972867	0.752781	4	6.67876	12.0649
	15.2443	1.2213	0.317419	16.8542	4.86949	8.93757
	5.92004	2.79517	0.442183	0.503238	13.6489	36.5359
	11.1217	5.66951	0.0235637	1.26039	3.25126	18.7981

## Sheet: g_Blautia
g_Blautia
Relative abundance	NC	DSS	DSS+SASP	DSS+TP-L	DSS+TP-M	DSS+TP-H
	1.41206	0.586585	8.5695	2.2628	18.4244	0.345938
	1.48691	0.0147965	2.09044	0.147346	8.28751	0.169749
	2.62016	0.400678	3.48033	0.520273	20.3677	0.127054
	10.0497	0.13859	0.153561	6.48568	7.33728	0.157403
	7.35931	0.148383	0.00428	15.6363	4.66095	0.973397

## Sheet: g_Romboutsia
g_Romboutsia
Relative abundance	NC	DSS	DSS+SASP	DSS+TP-L	DSS+TP-M	DSS+TP-H
	4.22824	3.31878	2.2992	3.44439	0.0263232	7.41049
	0.551271	0.617752	0.503699	0.255688	3.04785	3.1503
	0.170468	0.506627	0.246524	1.20565	1.93274	4.52355
	0.582196	0.118347	0.0388529	0.469388	0.87574	5.97836
	1.39419	0.495695	0.659783	0.809787	1.95748	6.5966

## Sheet: g_Coriobacteriaceae UCG 002
g_Coriobacteriaceae UCG 002
Relative abundance	NC	DSS	DSS+SASP	DSS+TP-L	DSS+TP-M	DSS+TP-H
	1.82051	0.189032	0.0474834	0.167289	0.265112	0.267952
	0.816323	0.0924779	0.0627318	0.0130011	0.29445	0.0379438
	0.609265	0.0982432	0.107955	0.0134388	0.443537	0.0613363
	0.528396	0.0903174	0.0148011	0.187304	0.197239	0.0231474
	1.16342	0.0668536	0.313911	0.537681	0.0990895	0.0261666

## Sheet: g_Lactobacillus
g_Lactobacillus
Relative abundance	NC	DSS	DSS+SASP	DSS+TP-L	DSS+TP-M	DSS+TP-H
	1.36873	0.0915929	0.149948	0.119744	0.203065	0.289948
	0.886901	0.0221947	0.0774922	0.145179	0.0721501	0.0659025
	1.58885	0.38912	0.194963	0.186223	0.141125	0.0722892
	0.727616	0.132362	0.12951	0.0112834	0.0769231	0.0370359
	0.403718	0.0717454	0.0814018	0.0326527	0.0467403	0.0261666

## Sheet: g_Bacteroides
g_Bacteroides
Relative abundance	NC	DSS	DSS+SASP	DSS+TP-L	DSS+TP-M	DSS+TP-H
	1.70098	16.097	6.09537	13.6613	3.89207	10.7721
	3.20647	0.201602	2.23251	18.8017	44.345	0.816791
	9.25105	1.46016	1.39697	7.3587	13.7375	2.93757
	4.63879	5.30069	12.148	18.6153	17.7337	5.97204
	10.2793	0.926168	5.86393	17.8545	17.8548	16.3157

## Sheet: g_Mucispirillum
g_Muribaculum
Relative abundance	NC	DSS	DSS+SASP	DSS+TP-L	DSS+TP-M	DSS+TP-H
	0.384615	2.52173	0.449843	2.7136	0.543386	0.243956
	0.639777	1.10912	0.702965	0.884074	1.26165	0.163758
	1.067	1.3754	1.44208	1.23829	0.467729	0.512596
	0.557155	2.77996	2.22572	0.843996	1.36884	0.328694
	1.13955	3.94763	0.880425	0.372241	0.706714	0.864806

## Sheet: g_Parabacteroides
g_Parabacteroides
Relative abundance	NC	DSS	DSS+SASP	DSS+TP-L	DSS+TP-M	DSS+TP-H
	5.63741	0.958803	1.68191	3.25069	1.36881	7.49247
	2.93084	0.599256	7.31932	2.52871	5.31961	3.49527
	4.36903	2.49414	6.96711	3.40769	2.01876	8.68018
	8.27177	1.70824	2.81961	1.67671	6.55227	4.89349
	11.3021	0.697887	6.46716	2.12025	1.778	2.16659

## Sheet: g_Muribaculum
g_Muribaculum
Relative abundance	NC	DSS	DSS+SASP	DSS+TP-L	DSS+TP-M	DSS+TP-H
	0.384615	2.52173	0.449843	2.7136	0.543386	0.243956
	0.639777	1.10912	0.702965	0.884074	1.26165	0.163758
	1.067	1.3754	1.44208	1.23829	0.467729	0.512596
	0.557155	2.77996	2.22572	0.843996	1.36884	0.328694
	1.13955	3.94763	0.880425	0.372241	0.706714	0.864806

[truncated: 5 more sheets: g_Bifidobacterium, g_Akkermansia, g_Escherichia Shigella, Figure 9C, Figure 9D]
