# Supplementary material for: Thyme (Thymus vulgaris L.) polyphenols ameliorate DSS-induced ulcerative colitis of mice by mitigating intestinal barrier damage, regulating gut microbiota, and suppressing TLR4/NF-κB-NLRP3 inflammasome pathways
Source: Royal Society of Chemistry journal article supplement (doi:10.1039/d2fo02523j), 2022-12-12
Supplement: d2fo02523j12.xlsx [file d2fo02523j12.xlsx]

## Sheet: Table S4
Peak no.	Ionization mode	Molecular Formula	Q1(Da)	Q3(Da)	MSn	Signal intensity	Identification
1	Positive	C18H16O7	345.1	315.06	344.09	135000000	Lysionotin
2	Positive	C27H30O14	579.17	271.07	578.16	48400000	Rhoifolin
3	Positive	C16H12O6	301.07	286.05	300.06	49300000	Hispidulin
4	Negative	C7H6O4	153.02	109.03	154.03	90100000	Protocatechuic acid
5	Positive	C28H32O15	609.18	301	608.17	29400000	Diosmin
6	Negative	C24H26O13	521.13	359.08	522.14	50300000	Rosmarinic acid-3-O-glucoside
7	Positive	C16H12O6	301.07	286.05	300.06	22300000	Diosmetin
8	Positive	C30H26O12	579.15	271.06	578.14	45300000	Apigenin-7-O-glucoside
9	Negative	C36H30O16	717.15	519.1	718.15	25500000	Salvianolic acid B
10	Positive	C24H22O14	535.11	287.05	534.1	12100000	Kaempferol-3-O-glucoside
11	Negative	C26H22O10	493.11	298.8	494.12	19400000	Salvianolic acid A
12	Positive	C15H12O5	273.08	153.02	272.07	23200000	Naringenin
13	Positive	C21H18O12	463.09	287.06	462.08	9600000	Scutellarin
14	Negative	C36H30O16	717.15	519	718.15	17200000	Lithospermic acid B
15	Positive	C26H20O8	461.12	285.08	460.12	15400000	Acacetin-7-O-glucuronide
16	Positive	C21H20O12	465.1	303.05	464.1	13100000	Isoquercitrin
17	Positive	C21H18O12	463.09	287.06	462.08	13000000	Luteolin-7-O-glucuronide
18	Negative	C9H8O4	179.03	135.05	180.04	4540000	Caffeic acid
19	Negative	C10H14O	149.1	133.07	150.1	3870000	Thymol
20	Negative	C16H18O9	353.09	191.01	354.09	3580000	Chlorogenic acid
21	Positive	C15H12O6	289.07	153.02	288.06	9510000	Eriodictyol
22	Negative	C9H10O5	197.05	123	198.05	8600000	Syringic acid
23	Positive	C15H10O5	271.06	153.01	270.05	8290000	Apigenin
24	Negative	C16H18O9	353.09	191.05	354.1	3580000	Cryptochlorogenic acid
25	Positive	C18H16O8	361.09	163.04	360.09	3510000	Rosmarinic acid
26	Positive	C24H22O15	551.1	303.05	550.1	3320000	Quercetin-7-O-glucoside
27	Negative	C21H18O12	461.07	285.04	462.08	2500000	Kaempferol-3-O-glucuronide
28	Negative	C10H10O4	193.05	134.01	194.06	2330000	Ferulic acid
29	Positive	C21H18O11	447.09	271.06	446.09	2180000	Apigenin-7-O-glucuronide
30	Negative	C8H8O4	167.03	108.02	168.04	1640000	Vanillic acid
31	Negative	C10H14O	149.1	107.05	150.1	1430000	Carvacrol
32	Negative	C20H16O13	463.05	300.99	464.06	1320000	Ellagic acid-4-O-glucoside
33	Positive	C9H8O3	165.05	119	164.05	1970000	p-Coumaric acid
34	Positive	C27H30O16	611.16	303.05	610.15	1790000	Rutin

## Sheet: Figure S2
Y-axis	shannon	The abscissa data will be found in Figure 8D data
DSS_1	4.61201
DSS_2	2.31727
DSS_3	3.92385
DSS_4	3.47069
DSS_5	4.13056
NC_1	4.74949
NC_2	5.94772
NC_3	5.40386
NC_4	5.89644
NC_5	5.67162
SASP_1	5.30553
SASP_2	4.10309
SASP_3	5.65119
SASP_4	5.18702
SASP_5	3.14523
TP_H_1	5.24086
TP_H_2	4.38691
TP_H_3	5.08097
TP_H_4	3.47464
TP_H_5	4.65076
TP_L_1	4.96771
TP_L_2	4.96213
TP_L_3	5.20884
TP_L_4	5.31834
TP_L_5	5.13576
TP_M_1	5.42003
TP_M_2	4.42891
TP_M_3	5.23268
TP_M_4	5.11083
TP_M_5	5.52313

## Sheet: Figure S3
Figure S3 data is represented in TXT format
