# Supplementary material for: Thyme (Thymus vulgaris L.) polyphenols ameliorate DSS-induced ulcerative colitis of mice by mitigating intestinal barrier damage, regulating gut microbiota, and suppressing TLR4/NF-κB-NLRP3 inflammasome pathways
Source: Royal Society of Chemistry journal article supplement (doi:10.1039/d2fo02523j), 2022-12-12
Supplement: d2fo02523j14.xlsx [file d2fo02523j14.xlsx]

## Sheet: Gallic acid
		Gallic acid
		concentration (ug/ml)	peak area (mAU*min)
	1	20.83	33.145
	2	41.67	71.451
	3	83.3	129.23
	4	166.6	301.62
	5	333.3	534.8
	TP sample (1mg/ml)	13.496	26.49
		14.629	28.33
		13.266	26.12
	standard curve	y = 1.62x+4.60
	Mean&SD	13.8	0.73
	content (ug/mg)	13.8±0.73

## Sheet: Scutellarin
		Scutellarin
		concentration (ug/ml)	peak area (mAU*min)
	SCU-1	20.83	138.24
	SCU-2	41.67	261.71
	SCU-3	83.3	501.503
	SCU-4	166.6	1068.3
	SCU-5	333.3	2033.48
	TP sample (1mg/ml)	161.45	998.444
		158.31	979.256
		162.28	1003.5
	standard curve	y = 6.11x+11.98
	Mean&SD	160.68	2.09
	content (ug/mg)	160.68±2.09

## Sheet: Ferulic acid
		Ferulic acid
		concentration (ug/ml)	peak area (mAU*min)
	1	20.83	81.97
	2	41.67	171.06
	3	83.3	324.28
	4	166.6	683.39
	5	333.3	1326.44
	TP sample (1mg/ml)	11.8	50.1
		12.19	51.65
		12.02	50.98
	standard curve	y = 3.99x+3.01
	Mean&SD	12	0.2
	content (ug/mg)	12.00±0.2

## Sheet: Apigenin-7-O-glucuronide
		Apigenin-7-O-glucuronide
		concentration (ug/ml)	peak area (mAU*min)
	1	20.83	63.12
	2	41.67	172.11
	3	83.3	348.52
	4	166.6	639.61
	5	333.3	1265.29
	TP sample (1mg/ml)	20.41	86.254
		21.77	91.375
		21	88.514
	standard curve	y = 3.79x+8.89
	Mean&SD	21.06	0.68
	content (ug/mg)	21.06±0.68

## Sheet: Rosmarinic acid
		Rosmarinic acid
		concentration (ug/ml)	peak area (mAU*min)
	RA-1	20.83	243.66
	RA-2	41.67	492.37
	RA-3	83.33	978.282
	RA-4	166.67	2223.92
	RA-5	333.33	4123.92
	TP sample (1mg/ml)	78.89	981.02
		79.84	993.57
		82.26	1023.47
	standard curve	y = 12.56x-9.66
	Mean&SD	80.33	1.74
	content (ug/mg)	80.33±1.74

## Sheet: Scutellarein
		Scutellarein
		concentration (ug/ml)	peak area (mAU*min)
	1	20.83	171.8
	2	41.67	324.66
	3	83.3	543.42
	4	166.6	1108.57
	5	333.3	2323.13
	TP sample (1mg/ml)	57.996	405.2
		56.15	392.57
		55.447	387.68
	standard curve	y = 6.87x+6.49
	Mean&SD	56.53	1.32
	content (ug/mg)	56.53±1.32
